# Supplementary material for: A Luminescent MOF Based on Pyrimidine-4,6-dicarboxylate Ligand and Lead(II) with Unprecedented Topology
Source: Preprints.org preprint supplement (doi:10.20944/preprints202309.1818.v1), 2023-09-27
Supplement: Supplementary file 1 [file supplementary]

Archive with 3 entries (3 files):
- ESI/Compound1.cif
- ESI/Compound1.pdf
- ESI/ESI_Crystals_PbPmdc.docx
