# Supplementary material for: A Luminescent MOF Based on Pyrimidine-4,6-dicarboxylate Ligand and Lead(II) with Unprecedented Topology
Source: Preprints.org preprint supplement (doi:10.20944/preprints202309.1818.v1), 2023-09-27
Supplement: Supplementary file 1 [file supplementary › ESI/Compound1.cif]

data_Compound1
_audit_creation_date               2023-06-26
_audit_creation_method
;
Olex2 1.5
(compiled 2023.03.06 svn.rbb2c1857 for OlexSys, GUI svn.r6748)
;
_shelx_SHELXL_version_number       '2018/3'
_audit_contact_author_address      ?
_audit_contact_author_email        ?
_audit_contact_author_name         ''
_audit_contact_author_phone        ?
_publ_contact_author_id_orcid      ?
_publ_section_references
;
Dolomanov, O.V., Bourhis, L.J., Gildea, R.J, Howard, J.A.K. & Puschmann, H.
 (2009), J. Appl. Cryst. 42, 339-341.

Sheldrick, G.M. (2015). Acta Cryst. A71, 3-8.

Sheldrick, G.M. (2015). Acta Cryst. C71, 3-8.
;
_chemical_name_common              ?
_chemical_name_systematic          ?
_chemical_formula_moiety           'C18 H9 N9 O23 Pb5'
_chemical_formula_sum              'C18 H9 N9 O23 Pb5'
_chemical_formula_weight           1755.31
_chemical_melting_point            ?
_chemical_oxdiff_formula           'C216  H108  N108  O276  Pb5'
_chemical_oxdiff_usercomment      
 'PbPmdc_132, PRISMA BLANCO UN POCO OPACO, 100K'
loop_
  _atom_type_symbol
  _atom_type_description
  _atom_type_scat_dispersion_real
  _atom_type_scat_dispersion_imag
  _atom_type_scat_source
 'C' 'C' 0.0033 0.0016 'International Tables Vol C Tables 4.2.6.8 and 6.1.1.4'
 'H' 'H' 0.0000 0.0000 'International Tables Vol C Tables 4.2.6.8 and 6.1.1.4'
 'N' 'N' 0.0061 0.0033 'International Tables Vol C Tables 4.2.6.8 and 6.1.1.4'
 'O' 'O' 0.0106 0.0060 'International Tables Vol C Tables 4.2.6.8 and 6.1.1.4'
 'Pb' 'Pb' -3.3944 10.1111
 'International Tables Vol C Tables 4.2.6.8 and 6.1.1.4'

_shelx_space_group_comment
;
The symmetry employed for this shelxl refinement is uniquely defined
by the following loop, which should always be used as a source of
symmetry information in preference to the above space-group names.
They are only intended as comments.
;
_space_group_crystal_system        'trigonal'
_space_group_IT_number             167
_space_group_name_H-M_alt          'R -3 c'
_space_group_name_Hall             '-R 3 2"c'
loop_
  _space_group_symop_operation_xyz
 'x, y, z'
 '-y, x-y, z'
 '-x+y, -x, z'
 'y, x, -z+1/2'
 'x-y, -y, -z+1/2'
 '-x, -x+y, -z+1/2'
 'x+2/3, y+1/3, z+1/3'
 '-y+2/3, x-y+1/3, z+1/3'
 '-x+y+2/3, -x+1/3, z+1/3'
 'y+2/3, x+1/3, -z+5/6'
 'x-y+2/3, -y+1/3, -z+5/6'
 '-x+2/3, -x+y+1/3, -z+5/6'
 'x+1/3, y+2/3, z+2/3'
 '-y+1/3, x-y+2/3, z+2/3'
 '-x+y+1/3, -x+2/3, z+2/3'
 'y+1/3, x+2/3, -z+7/6'
 'x-y+1/3, -y+2/3, -z+7/6'
 '-x+1/3, -x+y+2/3, -z+7/6'
 '-x, -y, -z'
 'y, -x+y, -z'
 'x-y, x, -z'
 '-y, -x, z-1/2'
 '-x+y, y, z-1/2'
 'x, x-y, z-1/2'
 '-x+2/3, -y+1/3, -z+1/3'
 'y+2/3, -x+y+1/3, -z+1/3'
 'x-y+2/3, x+1/3, -z+1/3'
 '-y+2/3, -x+1/3, z-1/6'
 '-x+y+2/3, y+1/3, z-1/6'
 'x+2/3, x-y+1/3, z-1/6'
 '-x+1/3, -y+2/3, -z+2/3'
 'y+1/3, -x+y+2/3, -z+2/3'
 'x-y+1/3, x+2/3, -z+2/3'
 '-y+1/3, -x+2/3, z+1/6'
 '-x+y+1/3, y+2/3, z+1/6'
 'x+1/3, x-y+2/3, z+1/6'

_cell_length_a                     14.3357(2)
_cell_length_b                     14.3357(2)
_cell_length_c                     53.4365(8)
_cell_angle_alpha                  90
_cell_angle_beta                   90
_cell_angle_gamma                  120
_cell_volume                       9510.6(3)
_cell_formula_units_Z              12
_cell_measurement_reflns_used      11239
_cell_measurement_temperature      99.95(13)
_cell_measurement_theta_max        28.0500
_cell_measurement_theta_min        1.8050
_shelx_estimated_absorpt_T_max     0.132
_shelx_estimated_absorpt_T_min     0.068
_exptl_absorpt_coefficient_mu      26.573
_exptl_absorpt_correction_T_max    0.134
_exptl_absorpt_correction_T_min    0.013
_exptl_absorpt_correction_type     gaussian
_exptl_absorpt_process_details
;
CrysAlisPro 1.171.42.92a (Rigaku Oxford Diffraction, 2023)
Numerical absorption correction based on gaussian integration over
a multifaceted crystal model
Empirical absorption correction using spherical harmonics,
implemented in SCALE3 ABSPACK scaling algorithm.
;
_exptl_absorpt_special_details     ?
_exptl_crystal_colour              'clear red'
_exptl_crystal_colour_lustre       clear
_exptl_crystal_colour_primary      red
_exptl_crystal_density_diffrn      3.640
_exptl_crystal_density_meas        ?
_exptl_crystal_density_method      ?
_exptl_crystal_description         block
_exptl_crystal_F_000               9168
loop_
  _exptl_crystal_face_index_h
  _exptl_crystal_face_index_k
  _exptl_crystal_face_index_l
  _exptl_crystal_face_perp_dist
 12 1 54 0.0504
 -12 -1 -54 0.0775
 13 0 -50 0.1028
 -4 -12 42 0.1152
 4 12 -42 0.0986
 16 -15 -32 0.0997
 -16 15 32 0.0839
 10 -20 2 0.0987
 -10 20 -2 0.1025
 -12 -1 52 0.1065

_exptl_crystal_size_max            0.22
_exptl_crystal_size_mid            0.184
_exptl_crystal_size_min            0.128
loop_
  _exptl_oxdiff_crystal_face_indexfrac_h
  _exptl_oxdiff_crystal_face_indexfrac_k
  _exptl_oxdiff_crystal_face_indexfrac_l
  _exptl_oxdiff_crystal_face_x
  _exptl_oxdiff_crystal_face_y
  _exptl_oxdiff_crystal_face_z
 11.9390 0.5501 53.9744 0.2846 -0.9585 0.0165
 -11.9390 -0.5501 -53.9744 -0.2846 0.9585 -0.0165
 12.8054 0.4336 -50.2561 0.0085 -0.0247 0.9997
 -3.9297 -12.1077 42.2975 0.5578 0.1648 -0.8134
 3.9297 12.1077 -42.2975 -0.5578 -0.1648 0.8134
 16.1529 -15.4886 -32.0868 0.7481 0.2226 0.6252
 -16.1529 15.4886 32.0868 -0.7481 -0.2226 -0.6252
 10.0005 -19.9916 2.0045 0.9458 0.2881 -0.0396
 -10.0005 19.9916 -2.0045 -0.9458 -0.2881 0.0396
 -12.2719 -0.9299 51.5035 0.0221 0.0102 -0.9997

_exptl_transmission_factor_max     ?
_exptl_transmission_factor_min     ?
_diffrn_reflns_av_R_equivalents    0.0549
_diffrn_reflns_av_unetI/netI       0.0226
_diffrn_reflns_Laue_measured_fraction_full  1.000
_diffrn_reflns_Laue_measured_fraction_max  1.000
_diffrn_reflns_limit_h_max         17
_diffrn_reflns_limit_h_min         -16
_diffrn_reflns_limit_k_max         17
_diffrn_reflns_limit_k_min         -16
_diffrn_reflns_limit_l_max         58
_diffrn_reflns_limit_l_min         -64
_diffrn_reflns_number              18124
_diffrn_reflns_point_group_measured_fraction_full  1.000
_diffrn_reflns_point_group_measured_fraction_max  1.000
_diffrn_reflns_theta_full          25.242
_diffrn_reflns_theta_max           25.350
_diffrn_reflns_theta_min           1.809
_diffrn_ambient_environment        N~2~
_diffrn_ambient_temperature        99.95(13)
_diffrn_detector                   'CCD plate'
_diffrn_detector_area_resol_mean   16.2439
_diffrn_detector_type              Eos
_diffrn_measured_fraction_theta_full  1.000
_diffrn_measured_fraction_theta_max  1.000
_diffrn_measurement_details
;
List of Runs (angles in degrees, time in seconds):

  # Type    Start    End  Width  t~exp~   \w     \q     \k     \f   Frames
--------------------------------------------------------------------------
  1  \w    -41.00  43.00   0.75   35.00    --  -26.31  77.00 150.00  112
  2  \w    -93.00 -30.75   0.75   35.00    --  -26.31 -77.00  30.00   83
  3  \w     -6.00  23.25   0.75   35.00    --  -26.31 -99.00-180.00   39
  4  \w     19.00  46.00   0.75   35.00    --  -26.31  57.00 -60.00   36
  5  \w   -100.00 -28.00   0.75   35.00    --  -26.31 -57.00-120.00   96
  6  \w     65.00 100.25   0.75   35.00    --   26.85  57.00 -90.00   47
  7  \w     -4.00  23.00   0.75   35.00    --   26.85  57.00 -90.00   36
  8  \w     51.00 111.00   0.75   35.00    --   26.85 178.00  60.00   80
  9  \w     35.00 110.00   0.75   35.00    --   26.85 178.00-180.00  100
;
_diffrn_measurement_device         'four-circle diffractometer'
_diffrn_measurement_device_type    'SuperNova, Single source at offset/far, Eos'
_diffrn_measurement_method         '\w scans'
_diffrn_orient_matrix_type        
 'CrysAlisPro convention (1999,Acta A55,543-557)'
_diffrn_orient_matrix_UB_11        0.0130321000
_diffrn_orient_matrix_UB_12        -0.0405114000
_diffrn_orient_matrix_UB_13        0.0028023000
_diffrn_orient_matrix_UB_21        -0.0370025000
_diffrn_orient_matrix_UB_22        -0.0338451000
_diffrn_orient_matrix_UB_23        -0.0092289000
_diffrn_orient_matrix_UB_31        0.0415660000
_diffrn_orient_matrix_UB_32        0.0218612000
_diffrn_orient_matrix_UB_33        -0.0091116000
_diffrn_radiation_monochromator    mirror
_diffrn_radiation_probe            x-ray
_diffrn_radiation_type             'Mo K\a'
_diffrn_radiation_wavelength       0.71073
_diffrn_source                     'micro-focus sealed X-ray tube'
_diffrn_source_type                'SuperNova (Mo) X-ray Source'
_reflns_Friedel_coverage           0.000
_reflns_Friedel_fraction_full      .
_reflns_Friedel_fraction_max       .
_reflns_number_gt                  1926
_reflns_number_total               1944
_reflns_special_details
;
 Reflections were merged by SHELXL according to the crystal
 class for the calculation of statistics and refinement.
 
 _reflns_Friedel_fraction is defined as the number of unique
 Friedel pairs measured divided by the number that would be
 possible theoretically, ignoring centric projections and
 systematic absences.
;
_reflns_threshold_expression       'I > 2\s(I)'
_computing_cell_refinement         'CrysAlisPro 1.171.42.92a (Rigaku OD, 2023)'
_computing_data_collection         'CrysAlisPro 1.171.42.92a (Rigaku OD, 2023)'
_computing_data_reduction          'CrysAlisPro 1.171.42.92a (Rigaku OD, 2023)'
_computing_molecular_graphics      'Olex2 1.5 (Dolomanov et al., 2009)'
_computing_publication_material    'Olex2 1.5 (Dolomanov et al., 2009)'
_computing_structure_refinement    'SHELXL 2018/3 (Sheldrick, 2015)'
_computing_structure_solution      'SHELXT 2018/2 (Sheldrick, 2018)'
_refine_diff_density_max           4.290
_refine_diff_density_min           -3.186
_refine_diff_density_rms           0.365
_refine_ls_extinction_coef         .
_refine_ls_extinction_method       none
_refine_ls_goodness_of_fit_ref     1.260
_refine_ls_hydrogen_treatment      constr
_refine_ls_matrix_type             full
_refine_ls_number_parameters       164
_refine_ls_number_reflns           1944
_refine_ls_number_restraints       0
_refine_ls_R_factor_all            0.0524
_refine_ls_R_factor_gt             0.0521
_refine_ls_restrained_S_all        1.260
_refine_ls_shift/su_max            0.001
_refine_ls_shift/su_mean           0.000
_refine_ls_structure_factor_coef   Fsqd
_refine_ls_weighting_details      
 'w=1/[\s^2^(Fo^2^)+(0.0001P)^2^+2663.0154P] where P=(Fo^2^+2Fc^2^)/3'
_refine_ls_weighting_scheme        calc
_refine_ls_wR_factor_gt            0.1169
_refine_ls_wR_factor_ref           0.1170
_refine_special_details            ?
_olex2_refinement_description
;
1. Fixed Uiso
 At 1.2 times of:
  All C(H) groups
 At 1.5 times of:
  All O(H) groups
2.a Riding coordinates:
 O1(H1)
2.b Aromatic/amide H refined with riding coordinates:
 C3(H3), C5(H5)
;
_atom_sites_solution_hydrogens     mixed
_atom_sites_solution_primary       dual
_atom_sites_solution_secondary     ?
loop_
  _atom_site_label
  _atom_site_type_symbol
  _atom_site_fract_x
  _atom_site_fract_y
  _atom_site_fract_z
  _atom_site_U_iso_or_equiv
  _atom_site_adp_type
  _atom_site_occupancy
  _atom_site_site_symmetry_order
  _atom_site_calc_flag
  _atom_site_refinement_flags_posn
  _atom_site_refinement_flags_adp
  _atom_site_refinement_flags_occupancy
  _atom_site_disorder_assembly
  _atom_site_disorder_group
 Pb1 Pb 0.17469(6) 0.49892(6) 0.31172(2) 0.0224(2) Uani 1 1 d . . . . .
 Pb2 Pb 0.79423(6) 0.666667 0.416667 0.0173(2) Uani 1 2 d S T P . .
 Pb3 Pb -0.333333 0.333333 0.333333 0.0187(4) Uani 1 6 d S T P . .
 N11 N 0.5174(13) 0.6019(12) 0.3585(3) 0.022(3) Uani 1 1 d . . . . .
 C12 C 0.6085(14) 0.6408(15) 0.3720(3) 0.021(4) Uani 1 1 d . . . . .
 H12 H 0.669333 0.706400 0.366774 0.025 Uiso 1 1 calc R U . . .
 N13 N 0.6177(12) 0.5918(11) 0.3922(3) 0.017(3) Uani 1 1 d . . . . .
 C14 C 0.5331(14) 0.4986(14) 0.3999(3) 0.018(4) Uani 1 1 d . . . . .
 C15 C 0.4357(14) 0.4546(14) 0.3873(3) 0.016(3) Uani 1 1 d . . . . .
 H15 H 0.374281 0.390475 0.392952 0.019 Uiso 1 1 calc R U . . .
 C16 C 0.4319(14) 0.5080(14) 0.3663(3) 0.019(4) Uani 1 1 d . . . . .
 C17 C 0.3308(15) 0.4676(14) 0.3511(3) 0.019(4) Uani 1 1 d . . . . .
 O171 O 0.3375(11) 0.5211(12) 0.3317(3) 0.037(4) Uani 1 1 d . . . . .
 O172 O 0.2481(10) 0.3883(11) 0.3581(3) 0.031(3) Uani 1 1 d . . . . .
 C18 C 0.5495(14) 0.4461(14) 0.4230(3) 0.015(3) Uani 1 1 d . . . . .
 O181 O 0.6357(10) 0.5018(10) 0.4346(2) 0.021(3) Uani 1 1 d . . . . .
 O182 O 0.4717(10) 0.3546(10) 0.4288(2) 0.022(3) Uani 1 1 d . . . . .
 O1 O 0.333333 0.666667 0.2962(6) 0.043(7) Uani 1 3 d S T P . .
 H1 H 0.333333 0.666667 0.279597 0.065 Uiso 1 3 d R U P . .
 O21 O -0.0136(11) 0.4825(14) 0.2984(3) 0.041(4) Uani 1 1 d . . . . .
 O22 O -0.1221(14) 0.3621(15) 0.3251(3) 0.048(4) Uani 1 1 d . . . . .
 O23 O -0.1877(11) 0.4101(12) 0.2945(3) 0.035(3) Uani 1 1 d . . . . .
 N24 N -0.1084(14) 0.4183(13) 0.3065(3) 0.029(4) Uani 1 1 d . . . . .

loop_
  _atom_site_aniso_label
  _atom_site_aniso_U_11
  _atom_site_aniso_U_22
  _atom_site_aniso_U_33
  _atom_site_aniso_U_23
  _atom_site_aniso_U_13
  _atom_site_aniso_U_12

 Pb1 0.0195(4) 0.0244(4) 0.0258(4) -0.0069(3) -0.0043(3) 0.0129(3)
 Pb2 0.0148(3) 0.0166(5) 0.0212(5) 0.0029(4) 0.00146(18) 0.0083(2)
 Pb3 0.0161(5) 0.0161(5) 0.0239(8) 0.000 0.000 0.0080(2)
 N11 0.030(9) 0.018(8) 0.023(8) 0.005(6) -0.006(7) 0.014(7)
 C12 0.016(9) 0.021(9) 0.025(9) 0.008(7) -0.001(7) 0.008(8)
 N13 0.020(8) 0.007(7) 0.021(7) 0.001(6) -0.006(6) 0.005(6)
 C14 0.014(8) 0.020(9) 0.023(9) 0.001(7) 0.000(7) 0.011(7)
 C15 0.013(8) 0.019(9) 0.023(9) -0.006(7) -0.001(7) 0.013(7)
 C16 0.015(9) 0.019(9) 0.024(9) -0.004(7) -0.003(7) 0.008(8)
 C17 0.025(10) 0.013(8) 0.021(9) -0.007(7) -0.013(8) 0.011(8)
 O171 0.025(8) 0.040(9) 0.040(8) 0.020(7) -0.005(6) 0.013(7)
 O172 0.016(7) 0.017(7) 0.044(8) 0.001(6) -0.005(6) -0.004(6)
 C18 0.017(9) 0.013(8) 0.012(7) 0.001(7) 0.000(7) 0.005(7)
 O181 0.033(7) 0.016(6) 0.017(6) 0.006(5) -0.005(5) 0.015(6)
 O182 0.016(6) 0.020(7) 0.025(7) 0.004(5) 0.001(5) 0.007(5)
 O1 0.023(8) 0.023(8) 0.08(2) 0.000 0.000 0.012(4)
 O21 0.023(8) 0.056(10) 0.037(8) 0.016(8) 0.003(6) 0.016(8)
 O22 0.056(11) 0.061(11) 0.036(9) 0.018(8) 0.012(8) 0.035(10)
 O23 0.024(8) 0.030(8) 0.045(8) 0.002(7) -0.002(7) 0.009(7)
 N24 0.030(9) 0.026(9) 0.031(9) 0.003(7) -0.001(7) 0.014(8)

_geom_special_details
;
 All esds (except the esd in the dihedral angle between two l.s. planes)
 are estimated using the full covariance matrix.  The cell esds are taken
 into account individually in the estimation of esds in distances, angles
 and torsion angles; correlations between esds in cell parameters are only
 used when they are defined by crystal symmetry.  An approximate (isotropic)
 treatment of cell esds is used for estimating esds involving l.s. planes.
;
loop_
  _geom_bond_atom_site_label_1
  _geom_bond_atom_site_label_2
  _geom_bond_distance
  _geom_bond_site_symmetry_2
  _geom_bond_publ_flag
 Pb2 O181 2.509(13) . ?
 Pb2 O181 2.509(12) 11_565 ?
 Pb2 N13 2.559(14) 11_565 ?
 Pb2 N13 2.558(14) . ?
 Pb2 O21 2.690(14) 34_655 ?
 Pb2 O21 2.690(14) 33_655 ?
 Pb3 O23 2.752(14) 3_455 ?
 Pb3 O23 2.752(14) 31_455 ?
 Pb3 O23 2.752(14) 33 ?
 Pb3 O23 2.752(14) . ?
 Pb3 O23 2.752(14) 32_445 ?
 Pb3 O23 2.752(14) 2_565 ?
 Pb1 O182 2.723(12) 30_455 ?
 Pb1 O172 2.759(14) 31 ?
 Pb1 O21 2.685(15) . ?
 Pb1 O1 2.485(11) . ?
 Pb1 O171 2.439(14) . ?
 Pb1 O171 2.522(14) 3_565 ?
 Pb1 N11 2.772(14) 3_565 ?
 O181 C18 1.25(2) . ?
 O182 C18 1.26(2) . ?
 O172 C17 1.22(2) . ?
 O23 N24 1.26(2) . ?
 N13 C12 1.33(2) . ?
 N13 C14 1.34(2) . ?
 O21 N24 1.28(2) . ?
 O1 H1 0.8854 . ?
 O171 C17 1.26(2) . ?
 N24 O22 1.23(2) . ?
 C17 C16 1.50(2) . ?
 N11 C16 1.36(2) . ?
 N11 C12 1.34(2) . ?
 C15 H15 0.9500 . ?
 C15 C16 1.37(2) . ?
 C15 C14 1.38(2) . ?
 C12 H12 0.9500 . ?
 C18 C14 1.52(2) . ?

loop_
  _geom_angle_atom_site_label_1
  _geom_angle_atom_site_label_2
  _geom_angle_atom_site_label_3
  _geom_angle
  _geom_angle_site_symmetry_1
  _geom_angle_site_symmetry_3
  _geom_angle_publ_flag
 O181 Pb2 O181 128.5(5) . 11_565 ?
 O181 Pb2 N13 76.3(4) 11_565 . ?
 O181 Pb2 N13 63.9(4) 11_565 11_565 ?
 O181 Pb2 N13 63.9(4) . . ?
 O181 Pb2 N13 76.3(4) . 11_565 ?
 O181 Pb2 O21 115.6(4) 11_565 34_655 ?
 O181 Pb2 O21 78.4(4) 11_565 33_655 ?
 O181 Pb2 O21 115.6(4) . 33_655 ?
 O181 Pb2 O21 78.4(4) . 34_655 ?
 N13 Pb2 N13 77.6(7) . 11_565 ?
 N13 Pb2 O21 136.1(5) 11_565 33_655 ?
 N13 Pb2 O21 72.1(5) . 33_655 ?
 N13 Pb2 O21 72.1(5) 11_565 34_655 ?
 N13 Pb2 O21 136.1(5) . 34_655 ?
 O21 Pb2 O21 149.2(8) 34_655 33_655 ?
 O23 Pb3 O23 69.4(5) 3_455 . ?
 O23 Pb3 O23 69.4(5) 32_445 33 ?
 O23 Pb3 O23 69.4(5) 32_445 31_455 ?
 O23 Pb3 O23 69.4(5) 3_455 2_565 ?
 O23 Pb3 O23 180.0 . 31_455 ?
 O23 Pb3 O23 69.4(5) . 2_565 ?
 O23 Pb3 O23 110.6(5) 2_565 33 ?
 O23 Pb3 O23 110.6(5) 3_455 32_445 ?
 O23 Pb3 O23 110.6(5) 3_455 31_455 ?
 O23 Pb3 O23 180.0 2_565 32_445 ?
 O23 Pb3 O23 110.6(5) 2_565 31_455 ?
 O23 Pb3 O23 180.0 3_455 33 ?
 O23 Pb3 O23 69.4(5) 33 31_455 ?
 O23 Pb3 O23 110.6(5) . 33 ?
 O23 Pb3 O23 110.6(5) . 32_445 ?
 O182 Pb1 O172 74.3(4) 30_455 31 ?
 O182 Pb1 N11 146.7(4) 30_455 3_565 ?
 O172 Pb1 N11 91.6(4) 31 3_565 ?
 O21 Pb1 O182 70.4(4) . 30_455 ?
 O21 Pb1 O172 90.7(5) . 31 ?
 O21 Pb1 N11 80.0(4) . 3_565 ?
 O1 Pb1 O182 83.5(8) . 30_455 ?
 O1 Pb1 O172 139.9(5) . 31 ?
 O1 Pb1 O21 112.9(5) . . ?
 O1 Pb1 O171 69.2(5) . 3_565 ?
 O1 Pb1 N11 123.1(7) . 3_565 ?
 O171 Pb1 O182 120.6(5) . 30_455 ?
 O171 Pb1 O182 124.4(4) 3_565 30_455 ?
 O171 Pb1 O172 150.4(4) 3_565 31 ?
 O171 Pb1 O172 92.4(5) . 31 ?
 O171 Pb1 O21 77.0(5) 3_565 . ?
 O171 Pb1 O21 169.0(5) . . ?
 O171 Pb1 O1 70.6(5) . . ?
 O171 Pb1 O171 95.3(8) . 3_565 ?
 O171 Pb1 N11 60.0(4) 3_565 3_565 ?
 O171 Pb1 N11 89.4(5) . 3_565 ?
 C18 O181 Pb2 123.6(10) . . ?
 C18 O182 Pb1 101.9(10) . 36 ?
 C17 O172 Pb1 136.6(13) . 31 ?
 N24 O23 Pb3 96.9(11) . . ?
 C12 N13 Pb2 122.1(12) . . ?
 C12 N13 C14 119.6(15) . . ?
 C14 N13 Pb2 118.3(11) . . ?
 Pb1 O21 Pb2 108.1(5) . 32_455 ?
 N24 O21 Pb2 115.8(11) . 32_455 ?
 N24 O21 Pb1 129.3(12) . . ?
 Pb1 O1 Pb1 109.4(7) 3_565 2_665 ?
 Pb1 O1 Pb1 109.4(7) 3_565 . ?
 Pb1 O1 Pb1 109.4(7) . 2_665 ?
 Pb1 O1 H1 109.5 . . ?
 Pb1 O1 H1 109.5 3_565 . ?
 Pb1 O1 H1 109.5 2_665 . ?
 Pb1 O171 Pb1 109.7(5) . 2_665 ?
 C17 O171 Pb1 129.5(12) . 2_665 ?
 C17 O171 Pb1 120.2(12) . . ?
 O23 N24 O21 118.6(16) . . ?
 O22 N24 O23 120.7(18) . . ?
 O22 N24 O21 120.6(17) . . ?
 O172 C17 O171 124.1(17) . . ?
 O172 C17 C16 119.5(16) . . ?
 O171 C17 C16 116.4(17) . . ?
 C16 N11 Pb1 116.7(11) . 2_665 ?
 C12 N11 Pb1 125.0(12) . 2_665 ?
 C12 N11 C16 117.1(15) . . ?
 C16 C15 H15 121.5 . . ?
 C16 C15 C14 117.0(16) . . ?
 C14 C15 H15 121.5 . . ?
 N11 C16 C17 115.7(16) . . ?
 N11 C16 C15 122.4(16) . . ?
 C15 C16 C17 121.8(16) . . ?
 N13 C12 N11 123.2(17) . . ?
 N13 C12 H12 118.4 . . ?
 N11 C12 H12 118.4 . . ?
 O181 C18 O182 128.3(15) . . ?
 O181 C18 C14 115.7(15) . . ?
 O182 C18 C14 115.8(15) . . ?
 N13 C14 C15 120.6(16) . . ?
 N13 C14 C18 116.9(15) . . ?
 C15 C14 C18 122.6(16) . . ?

loop_
  _geom_torsion_atom_site_label_1
  _geom_torsion_atom_site_label_2
  _geom_torsion_atom_site_label_3
  _geom_torsion_atom_site_label_4
  _geom_torsion
  _geom_torsion_site_symmetry_1
  _geom_torsion_site_symmetry_2
  _geom_torsion_site_symmetry_3
  _geom_torsion_site_symmetry_4
  _geom_torsion_publ_flag
 Pb2 O181 C18 O182 169.0(14) . . . . ?
 Pb2 O181 C18 C14 -15(2) . . . . ?
 Pb2 N13 C12 N11 178.6(13) . . . . ?
 Pb2 N13 C14 C15 180.0(12) . . . . ?
 Pb2 N13 C14 C18 1.1(19) . . . . ?
 Pb2 O21 N24 O23 -19(2) 32_455 . . . ?
 Pb2 O21 N24 O22 157.5(15) 32_455 . . . ?
 Pb3 O23 N24 O21 -157.9(15) . . . . ?
 Pb3 O23 N24 O22 25.3(19) . . . . ?
 Pb1 O182 C18 O181 18(2) 36 . . . ?
 Pb1 O182 C18 C14 -157.3(12) 36 . . . ?
 Pb1 O172 C17 O171 99(2) 31 . . . ?
 Pb1 O172 C17 C16 -83(2) 31 . . . ?
 Pb1 O21 N24 O23 -166.6(13) . . . . ?
 Pb1 O21 N24 O22 10(3) . . . . ?
 Pb1 O171 C17 O172 16(3) . . . . ?
 Pb1 O171 C17 O172 -174.0(14) 2_665 . . . ?
 Pb1 O171 C17 C16 -162.8(12) . . . . ?
 Pb1 O171 C17 C16 8(2) 2_665 . . . ?
 Pb1 N11 C16 C17 -12(2) 2_665 . . . ?
 Pb1 N11 C16 C15 170.1(13) 2_665 . . . ?
 Pb1 N11 C12 N13 -167.9(13) 2_665 . . . ?
 O181 C18 C14 N13 9(2) . . . . ?
 O181 C18 C14 C15 -169.9(16) . . . . ?
 O182 C18 C14 N13 -174.9(15) . . . . ?
 O182 C18 C14 C15 6(2) . . . . ?
 O172 C17 C16 N11 -174.0(17) . . . . ?
 O172 C17 C16 C15 4(3) . . . . ?
 O171 C17 C16 N11 4(2) . . . . ?
 O171 C17 C16 C15 -177.9(17) . . . . ?
 C16 N11 C12 N13 0(3) . . . . ?
 C16 C15 C14 N13 3(2) . . . . ?
 C16 C15 C14 C18 -178.3(15) . . . . ?
 C12 N13 C14 C15 -2(2) . . . . ?
 C12 N13 C14 C18 179.3(15) . . . . ?
 C12 N11 C16 C17 179.2(16) . . . . ?
 C12 N11 C16 C15 1(3) . . . . ?
 C14 N13 C12 N11 0(3) . . . . ?
 C14 C15 C16 C17 179.6(15) . . . . ?
 C14 C15 C16 N11 -3(3) . . . . ?

_shelx_res_file
;
TITL pbpmdc_132_a.res in R-3c
    pbpmdc_132.res
    created by SHELXL-2018/3 at 15:59:52 on 08-Aug-2023
REM Old TITL PbPmdc_132 in R-3c
REM SHELXT solution in R-3c: R1 0.080, Rweak 0.007, Alpha 0.027
REM <I/s> 3.382 for 269 systematic absences, Orientation as input
REM Formula found by SHELXT: C24 N7 O18 Pb5
CELL 0.71073 14.3357 14.3357 53.4365 90 90 120
ZERR 12 0.0002 0.0002 0.0008 0 0 0
LATT 3
SYMM -Y,+X-Y,+Z
SYMM +Y-X,-X,+Z
SYMM +Y,+X,0.5-Z
SYMM -Y+X,-Y,0.5-Z
SYMM -X,-X+Y,0.5-Z
SFAC C H N O Pb
UNIT 216 84 108 264 60

L.S. 12 0 0
PLAN  5
SIZE 0.128 0.184 0.22
TEMP -173
CONF
BOND
list 4
MORE -1
BOND $H
fmap 2 53
acta
SHEL 9999 0.83
REM <olex2.extras>
REM <HklSrc "%.\\pbpmdc_132.hkl">
REM </olex2.extras>

WGHT    0.000000 2662.333252
FVAR       0.03160
Pb2   5    0.794227    0.666667    0.416667    10.50000    0.01476    0.01659 =
         0.02116    0.00291    0.00146    0.00830
Pb3   5   -0.333333    0.333333    0.333333    10.16667    0.01606    0.01606 =
         0.02388    0.00000    0.00000    0.00803
PB1   5    0.174693    0.498924    0.311720    11.00000    0.01950    0.02444 =
         0.02583   -0.00689   -0.00431    0.01286
O181  4    0.635731    0.501772    0.434590    11.00000    0.03253    0.01647 =
         0.01684    0.00603   -0.00512    0.01538
O182  4    0.471662    0.354552    0.428788    11.00000    0.01626    0.02047 =
         0.02529    0.00408    0.00063    0.00669
O172  4    0.248118    0.388288    0.358073    11.00000    0.01640    0.01742 =
         0.04369    0.00088   -0.00471   -0.00428
O23   4   -0.187712    0.410122    0.294510    11.00000    0.02382    0.02984 =
         0.04527    0.00191   -0.00174    0.00878
N13   3    0.617712    0.591822    0.392228    11.00000    0.01954    0.00682 =
         0.02124    0.00065   -0.00566    0.00469
O21   4   -0.013561    0.482529    0.298424    11.00000    0.02312    0.05632 =
         0.03681    0.01646    0.00341    0.01551
O1    4    0.333333    0.666667    0.296167    10.33333    0.02343    0.02343 =
         0.08347    0.00000    0.00000    0.01172
AFIX   3
H1    2    0.333333    0.666667    0.279597    10.33333   -1.50000
AFIX   0
O171  4    0.337481    0.521122    0.331742    11.00000    0.02539    0.04007 =
         0.04023    0.02044   -0.00459    0.01344
N24   3   -0.108448    0.418278    0.306550    11.00000    0.02993    0.02553 =
         0.03058    0.00307   -0.00132    0.01423
O22   4   -0.122080    0.362060    0.325141    11.00000    0.05555    0.06069 =
         0.03578    0.01787    0.01241    0.03473
C17   1    0.330795    0.467558    0.351053    11.00000    0.02503    0.01298 =
         0.02149   -0.00744   -0.01348    0.01140
N11   3    0.517354    0.601939    0.358546    11.00000    0.02967    0.01780 =
         0.02254    0.00457   -0.00629    0.01381
C15   1    0.435725    0.454636    0.387314    11.00000    0.01335    0.01871 =
         0.02261   -0.00647   -0.00148    0.01253
AFIX  43
H15   2    0.374281    0.390475    0.392952    11.00000   -1.20000
AFIX   0
C16   1    0.431936    0.507978    0.366329    11.00000    0.01482    0.01858 =
         0.02356   -0.00396   -0.00345    0.00801
C12   1    0.608479    0.640784    0.371975    11.00000    0.01593    0.02100 =
         0.02517    0.00785   -0.00064    0.00815
AFIX  43
H12   2    0.669333    0.706400    0.366774    11.00000   -1.20000
AFIX   0
C18   1    0.549510    0.446137    0.423016    11.00000    0.01738    0.01279 =
         0.01172    0.00083    0.00029    0.00492
C14   1    0.533084    0.498552    0.399880    11.00000    0.01360    0.02003 =
         0.02335    0.00125    0.00021    0.01129
HKLF 4


REM  pbpmdc_132_a.res in R-3c
REM wR2 = 0.1170, GooF = S = 1.260, Restrained GooF = 1.260 for all data
REM R1 = 0.0521 for 1926 Fo > 4sig(Fo) and 0.0524 for all 1944 data
REM 164 parameters refined using 0 restraints

END

WGHT      0.0001   2663.9443

REM Highest difference peak  4.290,  deepest hole -3.186,  1-sigma level  0.365
Q1    1   0.1283  0.4358  0.3198  11.00000  0.05    4.29
Q2    1   0.3333  0.6667  0.3856  10.33333  0.05    2.44
Q3    1   0.4460  0.6667  0.4167  10.50000  0.05    1.74
Q4    1   0.8532  0.6891  0.4132  11.00000  0.05    1.66
Q5    1   0.2290  0.4913  0.3141  11.00000  0.05    1.60
;
_shelx_res_checksum                1877
_shelx_hkl_file
;
   0   0  -6 1293.83   14.63
   0   0  -6 1339.72   20.31
   0   0  -9    3.99    1.38
   0   0  -9    1.81    0.80
   0   0 -12 1785.34   24.25
   0   0 -12 1771.16   33.58
   0   0 -15    2.64    0.52
   0   0 -15    1.45    0.97
   0   0 -15    2.99    1.36
   0   0 -18 9238.87   94.56
   0   0 -18 9211.33   36.36
   0   0 -21    1.51    0.03
   0   0 -21    3.12    0.98
   0   0 -21    1.75    1.02
   0   0 -24  753.88   32.03
   0   0 -24  768.56   22.66
   0   0 -27    2.84    3.46
   0   0 -27    4.21    3.82
   0   0 -30 1455.03   51.24
   0   0 -30 1554.71   35.65
   0   0 -33    1.17    3.50
   0   0 -33    5.32    1.28
   0   0 -36 2469.10   73.97
   0   0 -36 2017.35   44.01
   0   0 -39    3.11    0.83
   0   0 -39    2.28    0.42
   0   0 -42  440.87   30.33
   0   0 -42  390.15   20.62
   0   0 -45   10.07    9.49
   0   0 -45    4.02    4.29
   0   0 -48 3653.98   88.49
   0   0 -48 3935.34   68.84
   0   0 -51    8.48    6.50
   0   0 -51    4.16    3.06
   0   0 -54   39.36    9.75
   0   0 -54   64.37    9.29
   0   0 -57    9.85    6.92
   0   0 -57    5.99    2.74
   0   0 -60   96.39   15.33
   0   0 -60  171.35   15.27
   0   0 -63   -7.35    7.25
   0   0 -63   10.42    4.48
   0   0 -66  893.02   48.93
   0   0 -66  938.36   37.15
   0   0 -69    2.33    1.21
   0  -1 -68   84.14   11.15
   1   0 -68   84.64   10.97
  -1   1 -68   83.74   11.54
  -1   1 -65   -0.95    4.11
   1   0 -65   -8.59    8.19
  -1   1 -65    5.70    4.80
   0  -1 -65    2.75    3.60
   1   0 -65   -3.14    3.85
   1   0 -62  551.37   37.83
  -1   1 -62  575.98   37.26
   0  -1 -62  605.84   29.60
   1   0 -62  613.37   29.38
  -1   1 -62  570.64   27.79
  -1   1 -59    7.20    5.21
   1   0 -59   -5.40    6.00
   0  -1 -59  -12.54   11.43
  -1   1 -59    7.65    3.79
   0  -1 -59    1.29    1.01
   1   0 -59    0.15    3.65
   1   0 -56  193.64   21.87
   0  -1 -56  183.70   20.47
  -1   1 -56  194.28   20.24
   0  -1 -56  184.57   15.81
  -1   1 -56  189.08   15.62
   1   0 -56  179.44   15.45
   0  -1 -53    1.71    0.32
   1   0 -53   -1.10    2.26
  -1   1 -53   -0.50    1.42
  -1   1 -53    0.38    1.21
   0  -1 -53    0.18    1.40
   1   0 -53   -1.52    2.88
  -1   1 -50  137.68   16.83
   1   0 -50  167.88   20.75
   0  -1 -50  128.33   17.67
  -1   1 -50  124.41   12.10
   0  -1 -50  137.57   13.98
   1   0 -50  135.99   12.69
   1   0 -47    4.84    4.67
   0  -1 -47   10.31    4.07
  -1   1 -47    4.31    2.32
   1   0 -47    2.20    0.64
  -1   1 -47    0.01    2.38
   0  -1 -47    4.56    2.12
   0  -1 -44  485.78   33.90
   1   0 -44  622.40   40.70
  -1   1 -44  419.92   27.45
   0  -1 -44  550.33   25.32
   1   0 -44  554.18   25.10
  -1   1 -44  539.49   24.45
   0  -1 -41    6.41    5.20
   1   0 -41   -0.90    2.15
  -1   1 -41    0.42    2.30
  -1   1 -41    3.23    1.66
   0  -1 -41    1.49    0.88
   1   0 -41    0.05    1.92
  -1   1 -38  293.94   22.03
   0  -1 -38  435.68   32.65
   1   0 -38  392.82   29.77
   1   0 -38  339.27   18.53
  -1   1 -38  330.42   17.97
   0  -1 -38  332.40   18.46
   1   0 -35    5.39    3.36
   0  -1 -35    1.46    1.33
  -1   1 -35    0.36    1.56
   0  -1 -35    2.63    1.23
   1   0 -35    0.35    2.18
  -1   1 -35    1.31    2.68
  -1   1 -32  195.93   17.34
   1   0 -32  240.11   20.86
   0  -1 -32  204.36   13.33
   1   0 -32  199.52   12.97
  -1   1 -32  206.88   13.26
   0  -1 -32  229.20    8.84
   0  -1 -29    4.49    1.34
   1   0 -29    3.52    3.40
   0  -1 -29   -0.83    2.78
  -1   1 -29    3.22    3.58
   0  -1 -29    2.95    1.79
   1   0 -29    3.32    1.78
  -1   1 -29    1.68    0.91
   0  -1 -26  864.36   36.30
  -1   1 -26  783.94   31.94
   1   0 -26  853.36   34.78
   1   0 -26  897.85   25.30
   0  -1 -26  862.07   25.37
  -1   1 -26  897.15   24.77
   0  -1 -26  947.60   16.95
   0  -1 -23    1.41    0.85
  -1   1 -23    2.32    2.80
   0  -1 -23    1.11    0.63
   1   0 -23    6.74    3.87
   0  -1 -23    1.73    1.75
  -1   1 -23    2.48    1.22
   1   0 -23    1.52    0.36
  -1   1 -20 2058.13   47.03
   1   0 -20 2095.22   47.11
   0  -1 -20 2122.92   49.18
   0  -1 -20 2137.50   35.07
   1   0 -20 2063.89   33.97
  -1   1 -20 2107.60   33.38
   0  -1 -20 2102.85   23.43
   0  -1 -20 2207.29   33.75
  -1   0  17    5.09    0.97
   0  -1 -17    2.48    0.87
   0  -1 -17    4.40    3.58
  -1   1 -17    4.02    1.70
   1   0 -17    9.80    3.35
  -1   1 -17    2.79    0.85
   0  -1 -17    3.73    1.70
   1   0 -17    1.92    1.26
   0  -1 -17    3.25    0.98
  -1   0  14 3971.75   37.81
   1   0 -14 4124.12   55.10
  -1   1 -14 3929.75   55.42
   0  -1 -14 4080.33   56.48
   0  -1 -14 4188.25   42.34
   1   0 -14 4005.20   40.21
  -1   1 -14 4098.89   38.03
   0  -1 -14 4041.04   31.07
   0  -1 -14 4251.95   40.41
  -1   0  11    2.01    0.95
   0  -1 -11    1.10    0.70
   0  -1 -11    2.05    1.94
  -1   1 -11    0.64    1.72
   1   0 -11    1.95    1.47
  -1   1 -11    1.61    0.09
   1   0 -11    2.10    0.70
   0  -1 -11    1.91    1.31
  -1   0   8  565.60   11.79
   0  -1  -8  538.13   16.15
  -1   1  -8  527.04   15.57
   1   0  -8  574.12   16.05
   1   0  -8  561.76   12.29
   1   0  -8  543.39   12.92
   0  -1  -8  548.29   10.40
   0  -1  -5    1.39    0.47
   1   0  -5    0.83    0.11
  -1   1  -5    0.97    0.66
   1   0  -5    1.91    0.89
  -1   1  -2  297.49    7.21
   1   0  -2  284.84    8.07
   0  -1  -2  286.81    6.60
  -1   1   1    2.02    0.58
   0  -1   1    1.10    0.46
   0  -1   4 2194.12   18.96
   0   1  -4 2173.32   23.76
   0   1  -7    0.94    1.13
  -1   0  -7    2.92    1.54
   1  -1  -7    1.41    0.80
   1  -1  -7    2.14    1.08
   0   1  -7    4.59    1.00
  -1   0  -7    2.27    0.80
  -1   1  10  434.23    8.93
  -1   0 -10  525.19   17.86
   1  -1 -10  388.43   16.10
   0   1 -10  541.43   19.57
   1  -1 -10  436.34   11.83
   0   1 -10  425.94   10.58
  -1   0 -10  431.54   12.21
  -1   0 -10  420.99    9.70
  -1   1  13    2.85    0.55
  -1   0 -13    1.42    0.73
  -1   0 -13    5.17    3.32
   0   1 -13    3.86    2.53
   1  -1 -13    4.73    1.38
   0   1 -13    4.32    1.20
  -1   0 -13    8.47    2.03
  -1   0 -16  981.94   31.21
   1  -1 -16  804.16   27.64
   0   1 -16  950.46   30.68
   1  -1 -16  860.09   20.45
   0   1 -16  877.54   19.30
  -1   0 -16  945.86   21.81
  -1   0 -16  858.58   13.70
  -1   0 -19    2.55    0.97
   1  -1 -19    2.27    2.27
   0   1 -19    0.94    2.52
  -1   0 -19    2.30    0.74
  -1   0 -19    2.41    0.81
   0   1 -19    1.93    1.31
   1  -1 -19    3.11    1.60
   0   1 -22 2606.26   59.47
   1  -1 -22 2267.63   53.54
  -1   0 -22 2666.24   61.29
   1  -1 -22 2148.17   36.92
  -1   0 -22 2228.00   36.59
   0   1 -22 2204.19   36.03
  -1   0 -22 2211.97   22.81
  -1   0 -25    1.89    0.72
  -1   0 -25    3.98    4.23
   0   1 -25   -0.69    2.12
   1  -1 -25    0.69    2.36
  -1   0 -25    5.46    2.23
   1  -1 -25    0.92    1.42
   0   1 -25    3.46    2.37
  -1   0 -28 1409.57   47.15
   1  -1 -28 1396.39   47.17
  -1   0 -28 1274.47   31.01
   0   1 -28 1286.11   30.86
   1  -1 -28 1287.37   31.76
  -1   0 -28 1282.52   17.57
  -1   0 -31    2.15    0.92
  -1   0 -31    4.26    3.24
   0   1 -31    3.65    2.56
   1  -1 -31    4.59    3.20
   1  -1 -31    1.03    1.25
   0   1 -31    2.43    2.73
  -1   0 -31    3.33    1.99
   1  -1 -34 2238.62   66.62
   0   1 -34 2290.19   65.03
  -1   0 -34 2138.99   43.66
   1  -1 -34 2154.14   45.04
   0   1 -34 2143.73   43.59
   0   1 -37    2.45    3.48
   1  -1 -37    3.53    1.16
  -1   0 -37    1.41    2.46
  -1   0 -37    0.86    1.90
   1  -1 -37    1.07    1.85
   0   1 -37    0.78    1.38
   0   1 -40   51.78   10.75
   1  -1 -40   54.77   12.40
  -1   0 -40   40.04    8.47
   0   1 -40   61.47    7.47
  -1   0 -40   62.42    7.92
   1  -1 -40   68.92    8.68
   0   1 -43    0.42    0.26
  -1   0 -43    1.29    2.90
   0   1 -43   -0.47    2.15
  -1   0 -43    4.45    3.15
   1  -1 -43    1.73    1.79
  -1   0 -46   12.28    5.20
   1  -1 -46   20.70    7.89
   0   1 -46   18.55    5.67
   1  -1 -46   14.26    3.36
   0   1 -46   14.32    3.87
  -1   0 -46    9.12    1.34
  -1   0 -49   -0.16    1.28
   0   1 -49   -3.88    3.73
   1  -1 -49   -2.84    6.39
  -1   0 -49    2.04    2.05
   1  -1 -49    1.83    2.17
   0   1 -49    3.48    1.41
   1  -1 -52  452.37   35.04
  -1   0 -52  439.93   30.62
   0   1 -52  442.65   30.07
   1  -1 -52  495.54   25.28
  -1   0 -52  486.79   25.19
   0   1 -52  468.90   24.21
   0   1 -55    5.29    3.99
  -1   0 -55   -1.30    4.07
   1  -1 -55    1.08    2.72
   0   1 -55   -0.59    0.63
  -1   0 -55   -1.68    2.11
   1  -1 -58   27.86    3.56
   0   1 -58   50.59   12.03
  -1   0 -58   57.60   11.14
   0   1 -58   67.03    9.72
   1  -1 -58   67.99    9.52
  -1   0 -58   59.63    9.19
   0   1 -61    5.53    6.68
  -1   0 -61   -1.20    2.99
  -1   0 -61    2.26    2.82
   0   1 -61    3.26    1.79
   1  -1 -61    4.34    2.02
  -1   0 -64   11.54    3.78
   0   1 -64   19.72    5.19
   1  -1 -64   35.51    7.57
   0   1 -64   25.63    5.17
  -1   0 -64   27.89    5.53
   0   1 -67   -3.61    5.62
   1  -1 -67   -0.40    3.17
  -1   0 -67    0.09    2.64
   0   1 -67    2.77    2.73
  -2   1   0   69.20    3.69
  -1   2   0   76.03    4.48
   1   1   0   73.40    4.33
   1  -2   0   69.02    3.82
  -1  -1   0   67.84    4.02
  -2   1  -3   48.43    3.25
   2  -1  -3   63.78    4.34
  -1   2  -3   48.83    3.87
  -1   2   3   46.30    3.62
   1   1  -3   54.99    3.64
   1  -2  -3   51.74    2.85
   1   1   3   53.34    3.61
   2  -1  -3   47.92    3.40
   1   1  -3   46.85    3.58
   2  -1  -3   50.13    4.69
  -2   1  -3   53.49    3.72
   1  -2  -3   48.01    2.70
  -1  -1   3   50.26    3.50
  -1  -1  -3   43.68    3.52
   1  -2   3   47.28    3.07
   1  -2  -3   44.90    3.19
  -1  -1  -6 1678.93   22.66
   1   1  -6 1867.42   26.11
  -2   1  -6 1871.29   25.82
  -1   2  -6 1765.14   27.18
   2  -1  -6 1699.21   26.46
   1  -2  -6 1756.43   20.51
   2  -1  -6 1790.41   23.08
   1   1  -6 1720.86   24.33
   1   1  -6 1716.71   22.16
  -1  -1  -6 1687.09   23.04
   1  -2  -6 1663.34   20.46
  -2   1  -6 1750.90   23.27
  -1  -1   9 1382.69   21.94
  -1   2  -9 1278.61   26.70
   1   1  -9 1425.06   27.03
  -1  -1  -9 1329.27   24.49
  -2   1  -9 1345.64   26.12
   2  -1  -9 1431.86   22.62
  -1   2  -9 1404.39   16.17
   2  -1  -9 1366.89   24.56
   1  -2  -9 1465.97   21.46
   1   1  -9 1428.41   22.30
   1  -2  -9 1383.37   14.75
  -2   1  -9 1474.27   24.26
   1  -2  -9 1381.72   19.54
  -1  -1  -9 1338.85   20.79
  -1  -1 -12    7.34    1.39
  -1  -1  12    7.74    2.19
   1  -2 -12    9.04    1.71
   1   1  12   12.12    2.88
  -1   2 -12    7.71    2.56
   1   1 -12    7.68    2.25
  -2   1 -12    7.28    2.55
  -1  -1 -12    8.81    2.71
  -1   2 -12    8.80    1.57
   1   1 -12    8.75    1.99
   2  -1 -12    9.06    2.06
   2  -1 -12   10.48    1.93
   1  -2 -12    8.83    2.25
  -2   1 -12    9.00    2.30
   1  -2 -12   11.49    2.20
  -1  -1 -12    7.94    1.20
   1   1  15  228.99   10.82
  -1  -1  15  232.41   10.55
  -2   1  15  240.59    9.69
  -1   2 -15  233.23   14.96
   1   1 -15  232.55   13.61
  -1  -1 -15  233.03   13.89
  -2   1 -15  217.51   13.04
   2  -1 -15  206.67   14.43
   2  -1 -15  232.40   10.65
   1  -2 -15  240.41   10.89
   1   1 -15  251.64   10.85
   2  -1 -15  227.91   11.03
  -1   2 -15  254.71    9.68
   1  -2 -15  250.33    9.45
   1  -2 -15  234.80    8.61
  -1  -1 -15  240.05    9.06
  -1   2  18  296.31    9.87
   1   1  18  293.27   13.53
  -2   1  18  280.82   11.01
  -1  -1  18  275.84   11.94
  -1   2 -18  250.89   15.68
   1   1 -18  281.10   16.52
  -1  -1 -18  275.54   16.67
  -2   1 -18  240.59   14.57
   2  -1 -18  255.97   17.07
   1  -2 -18  278.69   12.61
   1   1 -18  276.43   11.85
  -1   2 -18  295.19   11.44
   2  -1 -18  278.22   12.32
   1  -2 -18  303.98   11.16
   1  -2 -18  293.46    9.98
  -1  -1 -18  336.74   15.20
  -1  -1 -18  278.52    9.87
  -2   1  21  355.63   13.23
   2  -1 -21  310.14   20.13
  -2   1 -21  306.39   17.69
   1   1 -21  355.77   19.83
  -1   2 -21  295.62   18.24
  -1  -1 -21  376.01   21.51
   1  -2 -21  368.58   15.56
   1   1 -21  344.22   14.16
  -1   2 -21  368.54   14.15
   2  -1 -21  357.70   14.96
   1  -2 -21  379.19   13.34
  -1  -1 -21  360.38   11.45
   1  -2 -21  380.30   12.07
  -1  -1 -21  391.92   16.39
  -2   1 -21  419.42   11.98
  -2   1 -24   36.19    6.25
   1  -2 -24   30.48    4.06
  -1  -1 -24   36.75    6.85
   2  -1 -24   38.11    7.46
  -1   2 -24   30.92    6.32
   1   1 -24   40.88    7.25
  -1   2 -24   35.55    4.91
   1   1 -24   36.57    4.99
  -2   1 -24   33.82    4.66
   1  -2 -24   36.00    5.18
   2  -1 -24   31.95    4.99
  -1  -1 -24   33.76    5.16
  -1  -1 -24   33.09    3.60
  -2   1 -24   36.65    3.30
   1  -2 -24   35.52    3.86
  -1  -1 -24   34.30    5.02
   1  -2 -27  253.48   10.32
   2  -1 -27  219.77   18.80
   1   1 -27  241.10   18.59
  -1  -1 -27  281.06   22.22
  -1   2 -27  221.38   17.14
   1  -2 -27  224.14   19.08
  -2   1 -27  197.27   15.66
  -1  -1 -27  231.51   13.51
  -2   1 -27  209.03   12.12
   1  -2 -27  228.94   13.46
   2  -1 -27  209.53   12.60
  -1   2 -27  229.60   12.53
   1   1 -27  221.85   12.65
  -1  -1 -27  243.70   13.51
  -2   1 -27  240.84    7.76
  -1  -1 -27  232.12    9.36
  -1   2 -30  175.32   15.61
   2  -1 -30  186.97   18.27
  -2   1 -30  166.33   14.84
   1   1 -30  211.37   18.44
   1  -2 -30  188.48   18.60
  -1  -1 -30  249.70   22.74
  -1  -1 -30  207.74   13.22
  -1   2 -30  200.80   12.48
   2  -1 -30  189.57   12.46
  -2   1 -30  203.43   12.54
   1  -2 -30  197.32   13.09
   1   1 -30  188.60   12.14
  -2   1 -30  213.35    7.08
  -1  -1 -30  204.04    8.76
  -1  -1 -33   48.49   10.31
  -2   1 -33   37.51    6.89
   1  -2 -33   42.72    7.70
   2  -1 -33   42.67    9.44
   1   1 -33   50.14    9.80
  -1   2 -33   43.80    7.69
  -1  -1 -33   54.26    7.13
  -1   2 -33   48.52    6.61
   1   1 -33   50.59    6.83
   2  -1 -33   41.93    6.16
   1  -2 -33   47.49    6.89
  -2   1 -33   45.75    6.20
  -1  -1 -33   51.40    4.40
   1  -2 -36   13.15    4.42
   2  -1 -36    7.21    3.14
   1   1 -36   10.37    3.37
  -1   2 -36    8.47    2.66
  -2   1 -36   10.46    3.34
  -1  -1 -36   10.12    3.74
  -1  -1 -36    5.10    5.15
   1   1 -36    2.84    2.56
  -1   2 -36    7.45    4.12
   1  -2 -36    0.51    7.84
   2  -1 -36   12.44    8.90
  -2   1 -36    4.12    4.54
   1   1 -39  419.91   20.62
  -1  -1 -39  441.64   21.53
  -2   1 -39  434.31   20.67
  -1   2 -39  430.12   20.53
   1  -2 -39  440.92   21.67
   2  -1 -39  425.86   20.87
   1   1 -39  475.50   32.46
   2  -1 -39  435.73   31.29
   1  -2 -39  431.63   32.18
  -1  -1 -39  396.20   27.62
  -2   1 -39  351.41   23.53
  -1   2 -39  340.35   23.62
  -2   1 -42  529.72   23.47
  -1   2 -42  542.28   23.78
   1  -2 -42  543.63   24.90
   2  -1 -42  530.86   24.05
  -1  -1 -42  545.65   24.63
   1   1 -42  551.22   24.29
  -1  -1 -42  499.49   31.52
   2  -1 -42  611.61   38.81
   1  -2 -42  607.15   41.08
  -2   1 -42  455.53   27.94
   1   1 -42  673.66   40.21
  -1   2 -42  466.23   27.98
   1  -2 -45   66.81    8.89
  -1   2 -45   60.88    7.95
  -1  -1 -45   68.91    8.89
   1   1 -45   75.40    9.03
  -2   1 -45   57.86    7.81
   2  -1 -45   63.34    8.79
  -1   2 -45   65.64   11.47
  -2   1 -45   50.08    9.95
   1   1 -45   76.04   13.41
   1  -2 -45   89.80   12.32
   2  -1 -45   66.81   13.14
  -1  -1 -45   66.12   12.36
   2  -1 -48   53.24    8.30
  -1  -1 -48   46.45    7.12
   1  -2 -48   56.58    8.63
   1   1 -48   57.44    8.32
  -2   1 -48   45.89    7.18
  -1   2 -48   52.01    7.89
  -1  -1 -48   49.57    9.78
   2  -1 -48   59.10   12.42
  -2   1 -48   45.26    9.35
   1   1 -48   47.45   11.33
  -1   2 -48   50.10   10.11
   2  -1 -51   14.77    3.35
   1   1 -51   13.62    3.55
  -2   1 -51   15.74    5.18
  -1   2 -51   12.42    4.57
   1  -2 -51   15.46    3.13
  -1  -1 -51   15.16    5.28
  -1   2 -51   12.41    5.64
   1   1 -51    8.34    4.13
  -2   1 -51   12.92    5.59
   2  -1 -51   -5.65   12.32
  -1  -1 -51   14.90    5.08
  -2   1 -54  186.29   15.56
  -1   2 -54  190.20   15.26
   1   1 -54  209.90   16.27
  -1  -1 -54  207.31   16.73
   2  -1 -54  201.38   16.43
   1  -2 -54  200.79   16.60
  -1   2 -54  163.46   18.38
   1   1 -54  203.79   21.50
  -2   1 -54  183.41   19.14
   2  -1 -54  205.30   23.99
  -1  -1 -54  171.20   19.79
  -2   1 -57  136.04   13.38
  -1   2 -57  137.70   13.08
  -1  -1 -57  141.81   14.15
   1   1 -57  138.73   13.55
   2  -1 -57  136.11   13.74
   1  -2 -57  142.03   13.73
   1   1 -57  122.13   16.72
  -2   1 -57  131.69   17.06
  -1   2 -57  141.14   17.46
  -1  -1 -57  114.73   15.90
  -2   1 -60    0.50    2.39
   2  -1 -60    6.58    3.14
   1  -2 -60    5.04    1.68
  -1   2 -60    4.63    2.74
   1   1 -60    4.63    1.51
  -1  -1 -60   -1.02    4.56
   1   1 -60    5.86    6.73
  -1   2 -60    0.54    1.71
  -1  -1 -60   -3.31    8.22
  -2   1 -60    6.48    6.02
  -1   2 -63    6.57    2.71
  -2   1 -63    8.49    1.85
   2  -1 -63    5.44    2.72
  -1  -1 -63    6.67    1.62
   1  -2 -63    1.55    2.10
   1   1 -63    5.71    0.78
  -1   2 -63    7.37    5.06
  -2   1 -63    6.11    5.14
   1   1 -63   -3.02    5.97
  -1   2 -66   17.20    4.08
   1   1 -66   19.03    5.03
   1  -2 -66   23.76    6.32
  -2   1 -66   19.03    4.31
   2  -1 -66   23.22    6.43
  -1  -1 -66   14.25    2.92
  -2   1 -66   23.15    7.16
   1   1 -66   10.42    3.39
  -1   2 -66   10.26    6.75
  -2   1 -69   18.59    5.57
   1   1 -69   10.60    1.65
   0  -2 -67    3.58    0.64
  -2   2 -67    3.71    2.00
   2   0 -67    1.23    2.89
  -2   2 -67    3.71    4.85
   2   0 -64  222.96   18.30
  -2   2 -64  205.74   16.56
   0  -2 -64  212.35   18.08
  -2   2 -64  202.68   23.19
   2   0 -61    3.69    1.45
  -2   2 -61    3.99    3.21
   0  -2 -61    7.93    5.63
  -2   2 -61   -1.97    3.07
   0  -2 -58  139.01   14.24
   2   0 -58  134.97   13.82
  -2   2 -58  113.12   11.50
  -2   2 -58  124.80   16.04
   2   0 -58  118.82   16.56
   0  -2 -55    1.76    2.47
  -2   2 -55    3.45    2.90
   2   0 -55    0.86    1.94
   2   0 -55    0.55    6.28
  -2   2 -55    1.39    2.89
  -2   2 -52  503.89   24.38
   2   0 -52  514.46   26.26
   0  -2 -52  520.93   26.73
   0  -2 -49    1.84    2.26
  -2   2 -49    1.85    1.07
   2   0 -49    3.49    0.90
  -2   2 -49    1.14    1.69
   0  -2 -49   -5.59   10.55
   2   0 -49   -1.14    5.14
   2   0 -46   88.83   10.15
   0  -2 -46   92.93   10.87
  -2   2 -46   83.90    9.40
   2   0 -46   81.56   14.23
  -2   2 -46   67.84   11.05
   0  -2 -46   67.75   10.94
   0  -2 -43    0.25    1.88
  -2   2 -43    4.23    2.14
   2   0 -43    3.53    2.75
   0  -2 -43    1.43    7.43
   2   0 -43    7.76    5.16
  -2   2 -43    2.99    3.98
   2   0 -40 1209.81   36.03
   0  -2 -40 1230.38   36.64
  -2   2 -40 1194.10   34.16
  -2   2 -40 1024.03   40.83
   2   0 -40 1369.45   54.33
   0  -2 -40 1387.02   63.13
   0   2  37    2.86    2.22
  -2   2 -37    2.16    0.56
   0  -2 -37   -3.70    5.53
   2   0 -37    2.33    1.58
   2   0 -37    2.60    1.53
   0  -2 -37    0.40    2.41
  -2   2 -37    3.21    1.75
   0   2  34  326.00   15.82
   2   0 -34  344.68   24.71
   0  -2 -34  329.29   27.42
   0  -2 -34  369.02   18.84
  -2   2 -34  362.08   17.49
   2   0 -34  355.38   18.01
   0  -2 -34  369.66   12.99
   0  -2 -31    2.05    0.36
   0   2  31    2.89    2.14
   2   0 -31    5.71    4.56
  -2   2 -31    2.84    1.90
   0  -2 -31    1.14    4.92
  -2   2 -31    1.45    0.53
   2   0 -31    2.06    0.37
   0  -2 -31    3.18    1.82
   0   2  28 1657.12   31.95
   2   0 -28 1806.79   51.76
  -2   2 -28 1566.83   44.89
   0  -2 -28 1791.23   57.20
   2   0 -28 1714.31   36.51
   0  -2 -28 1772.97   38.66
  -2   2 -28 1716.07   34.51
  -2   2 -28 1698.66   14.54
   0  -2 -28 1760.36   27.50
   0  -2 -28 1823.22   35.15
  -2   0  25    1.36    0.86
   0   2  25    3.88    1.39
  -2   2 -25    4.22    0.97
   0  -2 -25    1.52    0.72
   0  -2 -25   -1.82    4.81
   2   0 -25    6.34    4.19
  -2   2 -25    3.04    2.37
  -2   2 -25    1.76    1.15
   0  -2 -25    2.80    0.46
   2   0 -25    4.32    1.99
   0  -2 -25    0.94    1.27
  -2   0  22 1277.15   27.96
   0   2  22 1146.61   25.19
   0  -2 -22 1082.40   39.60
  -2   2 -22 1039.15   34.14
   2   0 -22 1214.65   37.96
   2   0 -22 1204.28   28.13
  -2   2 -22 1290.09   26.55
   0  -2 -22 1264.04   29.90
   0  -2 -22 1259.21   22.34
   0  -2 -22 1412.36   29.94
   0   2  19    4.00    2.48
   0  -2 -19    0.44    0.70
  -2   0  19    2.54    1.41
  -2   2 -19    2.62    0.69
   0  -2 -19    0.40    4.61
   2   0 -19    2.49    2.22
  -2   2 -19    4.43    0.90
   0  -2 -19    5.21    1.52
   2   0 -19    4.48    1.81
   0  -2 -19    5.66    1.71
  -2   0  16 2038.71   31.97
   2   0 -16 2003.64   42.39
  -2   2 -16 1985.13   43.40
  -2   2 -16 1999.64   27.94
   2   0 -16 2033.87   32.90
   0  -2 -16 2027.10   28.15
   0  -2 -13    0.95    0.40
  -2   0  13    1.75    0.26
   2   0 -13    1.19    0.50
  -2   2 -13    3.92    0.66
   2   0 -13    1.47    1.22
   2   0 -13    3.49    0.88
   0  -2 -13    4.96    1.36
  -2   2 -10  300.50   13.69
   2   0 -10  319.45   14.20
   2   0 -10  309.19   11.58
   2   0 -10  299.19   12.62
   0  -2 -10  301.92   10.31
   0  -2  -7    2.42    1.09
  -2   2  -7    0.10    0.61
   2   0  -7    1.58    1.40
   2   0  -7    3.40    1.21
   2   0  -7    1.73    1.04
   0   2   4 1697.93   20.62
  -2   2  -4 1679.35   24.20
  -2   0   4 1676.51   20.17
  -2   2  -1    0.93    0.77
   0   2   1    1.29    0.83
   0  -2  -1    2.05    0.87
   0  -2  -1    1.94    0.37
   0   2  -2  436.67   10.82
  -2   2   2  416.03   11.72
   0  -2   2  442.90    9.59
   2   0   2  487.61   15.83
   2  -2  -2  459.66    8.93
   0  -2   2  459.50   10.86
   0  -2   5    0.98    0.84
   2   0   5    3.67    1.38
   0  -2   5    2.16    0.89
   0   2  -5    2.10    0.69
  -2   0  -5    2.59    0.94
   2  -2  -5    4.39    1.16
   2  -2  -5    1.93    0.84
   2   0   8 3835.14   44.40
   0  -2   8 3462.03   33.69
  -2   0  -8 3625.01   37.54
   0   2  -8 3492.83   42.97
   0   2  -8 3827.35   31.09
   2  -2  -8 3553.59   36.59
   2  -2  -8 3556.17   33.87
  -2   0  -8 3590.34   40.92
   0  -2   8 3674.53   26.83
   0  -2  11    2.54    0.77
   0   2 -11    3.28    2.12
  -2   0 -11    2.89    1.29
   0   2 -11    7.13    1.64
   2  -2 -11    3.53    1.36
  -2   0 -11    1.99    1.21
   2  -2 -11    3.60    1.75
  -2   2  14  610.06   13.04
  -2   0 -14  603.42   20.63
   0   2 -14  638.94   24.35
   0   2 -14  619.50   15.16
   2  -2 -14  599.16   16.86
   2  -2 -14  589.68   16.06
   0  -2  14  589.58    8.58
  -2   0 -17    3.21    0.71
  -2   2  17    2.42    1.12
   0   2 -17    2.27    1.23
  -2   0 -17    1.38    1.55
   2  -2 -17    4.46    1.63
   0   2 -17    3.46    1.09
  -2   0 -17    2.01    1.01
  -2   2  20 1733.83   24.84
   0   2 -20 2191.84   52.78
  -2   0 -20 1840.49   42.94
   2  -2 -20 1816.91   33.69
   0   2 -20 1803.22   30.20
  -2   0 -20 2045.45   29.64
  -2   0 -20 1968.95   36.93
  -2   0 -23    3.88    0.97
  -2   0 -23    4.14    0.99
   0   2 -23    6.84    3.70
   0   2 -23    4.27    1.47
   2  -2 -23    2.57    1.51
   0   2 -26  698.87   32.86
   0   2 -26  665.18   20.90
   2  -2 -26  619.00   22.06
  -2   0 -26  667.90   22.91
  -2   0 -26  668.96   15.96
  -2   0 -29    2.01    1.03
  -2   0 -29    1.42    2.56
   0   2 -29    2.00    1.07
   2  -2 -29    2.94    0.55
  -2   0 -29    4.28    1.86
   0   2 -29    2.15    1.01
  -2   0 -32  472.89   25.88
   0   2 -32  528.37   30.01
   0   2 -32  525.26   20.68
   2  -2 -32  531.12   21.81
  -2   0 -32  537.49   21.74
  -2   0 -32  561.23   14.22
  -2   0 -35    1.32    0.95
   0   2 -35    0.52    1.31
   2  -2 -35    2.78    2.15
  -2   0 -35    5.02    4.29
   0   2 -35    4.35    4.29
   2  -2 -38  281.69   16.94
  -2   0 -38  284.59   16.95
   0   2 -38  291.74   16.84
   0   2 -38  241.67   20.61
  -2   0 -38  226.67   18.81
   0   2 -41    4.60    1.33
  -2   0 -41    2.25    2.65
   2  -2 -41    1.74    1.72
   0   2 -41    5.37    1.75
  -2   0 -41   -0.73    0.91
   0   2 -44  901.25   31.64
   2  -2 -44  858.61   31.79
  -2   0 -44  881.41   31.84
  -2   0 -44  712.63   35.39
   0   2 -44  756.56   37.66
   0   2 -47    1.64    0.28
   2  -2 -47   -0.49    2.26
  -2   0 -47   -0.60    1.26
  -2   0 -47    0.26    1.19
   0   2 -47    1.65    3.12
   2  -2 -50   61.22    9.22
   0   2 -50   51.47    7.65
  -2   0 -50   57.54    8.51
   0   2 -50   41.72    9.76
  -2   0 -50   50.46   10.10
  -2   0 -53    0.32    1.22
   2  -2 -53   -0.69    2.82
   0   2 -53    5.51    3.39
  -2   0 -53   -0.85    3.54
   0   2 -53    2.54    2.37
  -2   0 -56  458.18   25.29
   0   2 -56  468.26   24.75
   2  -2 -56  447.20   24.76
   0   2 -56  378.17   28.76
  -2   0 -56  378.10   29.07
   2  -2 -59    5.46    2.94
  -2   0 -59   -1.71    2.07
   0   2 -59    2.62    1.83
   0   2 -59    4.10    3.69
  -2   0 -59   -0.24    4.24
   2  -2 -62   46.14    7.71
  -2   0 -62   53.61    8.81
   0   2 -62   50.37    7.41
  -2   0 -62   41.79   10.09
   0   2 -62   47.67   11.27
   2  -2 -65    0.61    1.45
   0   2 -65   -2.13    1.36
  -2   0 -65    0.32    1.89
   0   2 -65    7.15    6.29
  -2   0 -65   -0.63    7.03
  -2   0 -68  194.52   17.08
   0   2 -68  206.35   17.30
  -2   0 -68  176.56   20.18
   2   1 -68   14.22    2.80
  -3   2 -65   19.53    5.23
  -1  -2 -65   20.83    6.07
   3  -1 -65   26.90    5.81
   2   1 -65   18.76    4.58
   1  -3 -65   22.54    5.52
  -2   3 -65   21.76    6.44
  -3   2 -65   27.30    9.43
   2   1 -65   15.33    6.12
   1  -3 -62    6.01    2.96
   3  -1 -62    1.12    1.17
  -1  -2 -62    3.54    2.03
   2   1 -62    7.70    2.92
  -3   2 -62   -2.95    3.77
  -3   2 -62    6.56    7.96
  -2   3 -62   -1.32    3.05
   2   1 -62   -3.52    5.90
  -1  -2 -59   14.74    4.85
   3  -1 -59   15.28    4.55
   2   1 -59   18.97    5.45
  -3   2 -59   12.69    3.43
   1  -3 -59   12.93    4.80
  -2   3 -59   12.87    3.78
  -3   2 -59    9.16    5.79
   2   1 -59    4.20    2.46
  -2   3 -59    6.23    3.68
  -2   3 -56   20.63    5.03
   2   1 -56   26.63    5.43
   3  -1 -56   16.76    5.08
  -1  -2 -56   21.29    5.25
  -3   2 -56   15.23    4.05
   1  -3 -56   21.96    5.70
  -3   2 -56   18.90    6.16
  -2   3 -56   14.31    3.99
   2   1 -56   29.76   10.56
   1  -3 -53  434.68   24.63
   3  -1 -53  424.65   24.17
   2   1 -53  448.63   24.69
  -1  -2 -53  455.86   25.55
  -3   2 -53  420.85   22.50
  -2   3 -53  414.70   22.11
  -3   2 -53  368.94   27.34
   2   1 -53  483.98   37.23
  -2   3 -53  378.31   27.73
  -2   3 -50  100.60   10.51
  -1  -2 -50  106.74   12.09
   1  -3 -50  101.46   11.71
   3  -1 -50   91.34   10.78
   2   1 -50  100.54   11.70
  -3   2 -50  101.28   10.65
  -3   2 -50   77.27   11.84
  -1  -2 -50   74.89    9.65
   2   1 -50  105.03   17.11
  -2   3 -50   70.27   11.82
  -3   2 -47   78.34    9.56
   3  -1 -47   86.77   10.22
  -1  -2 -47   93.12   11.31
   1  -3 -47   87.37   10.39
   2   1 -47   90.67   10.40
  -2   3 -47   75.02    8.96
  -2   3 -47   80.86   11.68
  -1  -2 -47   66.59    8.84
   2   1 -47  114.50   17.77
   3  -1 -47   90.36   13.62
  -3   2 -47   79.82   12.33
   2   1 -44  102.35   11.08
   1  -3 -44  105.73   11.19
  -2   3 -44   96.23    9.75
  -3   2 -44   94.81    9.91
  -1  -2 -44  106.81   11.49
   3  -1 -44   96.44   10.72
   3  -1 -44   91.52   13.43
  -1  -2 -44   81.17   12.11
   2   1 -44  107.59   15.26
  -2   3 -44   85.27   12.55
  -3   2 -44   81.83   11.86
   1   2  41  171.08   13.40
   2   1 -41  154.08   12.98
  -3   2 -41  140.47   11.61
   1  -3 -41  154.32   13.44
   3  -1 -41  139.10   12.40
  -2   3 -41  142.83   12.03
  -1  -2 -41  153.95   13.19
   2   1 -41  168.67   19.75
  -3   2 -41  138.12   15.64
  -2   3 -41  160.79   16.67
   3  -1 -41  163.61   19.29
  -1  -2 -41  146.91   17.22
   1   2  38 1021.17   31.11
  -1  -2 -38 1032.95   49.32
   2   1 -38 1137.78   46.97
  -3   2 -38  876.34   37.46
   3  -1 -38 1063.42   48.29
  -2   3 -38  886.44   37.82
  -1  -2 -38 1070.40   34.39
   3  -1 -38 1009.68   32.35
  -2   3 -38 1050.35   31.28
   2   1 -38 1054.59   32.88
  -3   2 -38  998.28   30.19
   1  -3 -38 1073.77   34.11
   1  -3 -35  948.13   23.46
  -1   3  35  774.24   23.15
   1   2  35  750.17   25.73
   2   1 -35  808.32   38.33
   3  -1 -35  775.56   39.97
  -3   2 -35  689.04   32.23
  -1  -2 -35  938.03   48.40
  -2   3 -35  680.34   32.39
   3  -1 -35  803.50   27.96
   1  -3 -35  874.75   29.67
  -2   3 -35  858.19   27.37
   2   1 -35  819.21   28.20
  -3   2 -35  828.69   26.65
  -1  -2 -35  872.02   30.09
  -1  -2 -35  858.38   20.83
  -1  -2 -35  944.00   29.85
   1   2  32  133.89   10.37
  -1   3  32  148.12    9.82
  -2   3 -32  121.66   13.16
   2   1 -32  161.72   16.06
  -1  -2 -32  161.51   19.06
   3  -1 -32  164.84   17.39
  -3   2 -32  131.66   13.93
  -3   2 -32  132.12   10.31
   2   1 -32  142.51   11.37
  -2   3 -32  146.20   10.75
   1  -3 -32  142.90   11.84
  -1  -2 -32  137.45   11.50
   3  -1 -32  137.47   11.15
  -1  -2 -32  152.41   12.15
  -1  -2 -32  139.30    8.29
   1  -3 -32  148.70    9.12
  -1   3  29  607.85   21.13
   1   2  29  451.93   18.57
  -3   1  29  519.28   19.42
   3  -1 -29  481.52   28.99
   2   1 -29  512.53   27.45
  -2   3 -29  439.53   24.88
  -3   2 -29  441.05   24.33
  -1  -2 -29  571.04   33.22
  -1  -2 -29  564.28   22.90
   3  -1 -29  514.34   20.82
  -2   3 -29  559.89   20.17
  -3   2 -29  523.28   19.50
   2   1 -29  522.66   20.87
   1  -3 -29  550.68   21.85
  -3   2 -29  581.14   14.02
   1  -3 -29  556.71   18.83
  -1  -2 -29  553.75   16.74
   1  -3 -29  560.81   17.01
  -1  -2 -29  673.21   25.41
   1   2  26  316.88   14.89
  -2  -1  26  361.21   16.81
  -3   1  26  355.77   15.54
  -1   3  26  448.09   17.93
   2   1 -26  366.26   21.91
  -1  -2 -26  374.15   25.37
   3  -1 -26  355.18   24.23
  -2   3 -26  316.90   20.16
  -3   2 -26  321.11   20.26
   3  -1 -26  342.57   16.22
   1  -3 -26  357.45   17.07
  -3   2 -26  340.76   15.14
  -2   3 -26  371.19   15.44
   2   1 -26  352.26   16.34
   1  -3 -26  346.88   13.05
  -1  -2 -26  343.70   13.15
  -1  -2 -26  465.91   21.52
   1  -3 -26  367.64   14.94
  -3   1  23 1855.66   34.12
  -2  -1  23 1896.48   36.88
   1   2  23 1819.65   36.75
   2   1 -23 1846.91   46.18
  -2   3 -23 1788.28   46.68
  -1  -2 -23 1879.25   52.40
   3  -1 -23 1822.50   52.26
  -3   2 -23 1753.59   45.78
  -2   3 -23 1908.10   32.61
   3  -1 -23 1781.66   35.78
   1  -3 -23 1883.95   37.42
   2   1 -23 1843.55   36.26
  -1  -2 -23 2081.47   40.95
   1  -3 -23 1864.01   30.27
   1  -3 -23 2047.29   34.61
  -1  -2 -23 1834.66   30.04
  -2  -1  20  669.88   21.10
  -3   1  20  694.96   20.29
   2   1 -20  627.56   25.24
  -2   3 -20  650.84   27.60
  -1  -2 -20  617.03   27.96
   3  -1 -20  597.78   28.15
  -3   2 -20  688.60   29.03
   1  -3 -20  682.25   21.11
   2   1 -20  697.49   21.56
  -2   3 -20  720.09   18.40
   3  -1 -20  689.08   23.93
   3  -1 -20  659.20   20.98
  -1  -2 -20  680.39   18.35
   1  -3 -20  694.66   18.10
  -1  -2 -20  702.24   22.35
  -1  -2 -17    8.92    2.36
   1  -3 -17   12.04    2.56
  -2  -1  17    7.89    2.20
   1   2  17    9.63    2.12
  -1  -2 -17    0.87    3.79
  -2   3 -17    5.69    2.91
  -3   2 -17   15.05    3.21
   2   1 -17    6.32    2.73
   1  -3 -17   12.99    2.79
   3  -1 -17    6.96    2.37
   3  -1 -17    8.45    2.71
  -2   3 -17    9.91    2.08
   2   1 -17   10.97    2.53
   1  -3 -17    9.92    2.35
  -1  -2 -17    9.24    2.57
  -2  -1  14   19.64    3.22
  -2   3 -14   21.58    4.30
  -3   2 -14   18.84    4.06
   2   1 -14   20.71    4.40
   3  -1 -14   25.09    4.10
   1  -3 -14   19.97    3.37
   3  -1 -14   17.08    3.59
  -2   3 -14   18.70    2.36
   2   1 -14   25.62    3.77
   1  -3 -14   21.95    3.23
  -1  -2 -14   22.58    3.42
  -2   3 -11   56.64    6.45
   2   1 -11   52.37    5.65
  -3   2 -11   59.18    6.37
   1  -3 -11   67.91    5.26
   3  -1 -11   58.31    6.31
   3  -1 -11   66.92    5.86
   2   1 -11   68.84    5.94
  -2   3 -11   73.90    3.89
   2   1 -11   58.30    6.09
  -1  -2 -11   60.79    5.38
   1  -3 -11   66.87    5.21
  -3   2  -8   22.70    3.82
   2   1  -8   23.95    3.43
  -2   3  -8   22.11    4.04
   3  -1  -8   25.59    4.43
   2   1  -8   21.17    3.26
   3  -1  -8   28.83    3.64
   1   2   8   27.11    2.81
  -1  -2  -8   27.31    3.64
  -3   1   8   24.06    2.36
   1  -3  -8   24.23    3.11
  -2   3  -5 2902.28   37.29
  -1   3   5 2888.60   34.80
  -3   2  -5 2940.99   33.91
   1   2   5 2896.31   24.96
   2   1  -5 2948.15   31.01
   3  -1  -5 2861.82   41.81
   3  -1  -5 2898.37   34.46
   1   2   5 3016.78   28.37
   2   1  -5 2845.75   37.17
   1  -3  -5 2897.19   32.24
  -1  -2  -5 2791.73   34.31
  -2  -1   5 2888.84   33.05
  -1   3   2  494.82   13.49
   1   2   2  490.06    9.33
   3  -1  -2  574.75   17.30
  -2   3  -2  484.64   14.26
  -3   2  -2  481.56   12.92
   2   1  -2  514.26    9.92
   1   2   2  484.43   11.35
   3  -1  -2  525.55   18.04
   2   1  -2  463.11   14.81
   1  -3  -2  478.69   11.85
  -1  -2  -2  464.04   13.65
  -2  -1   2  453.60   12.96
   1  -3  -2  469.73   12.55
  -3   2  -2  526.54   12.22
  -1   3  -1  400.82   12.34
  -2   3   1  389.91   12.58
  -3   1  -1  374.17    9.10
  -3   2   1  379.58   11.48
   1   2  -1  391.26    9.10
   1   2  -1  403.11   11.21
   2   1   1  399.40   13.90
   2  -3  -1  439.65    8.13
  -1  -2   1  387.69   12.21
   1  -3   1  417.38   11.51
  -1  -2   1  411.44   12.71
  -3   2   1  457.59    9.45
  -2   3   4  654.05   17.54
  -3   1  -4  684.55   13.31
   3  -1   4  730.59   19.73
  -1   3  -4  675.47   17.30
   1   2  -4  682.95   15.84
   3  -2  -4  683.15   14.71
   3  -2  -4  733.42   20.26
   2   1   4  725.58   18.55
   2  -3  -4  725.05   12.91
  -1  -2   4  643.74   15.43
  -1  -2   4  670.22   15.92
   2  -3  -4  686.69   11.34
  -3   1  -4  680.60   17.44
   1  -3   4  668.37   14.03
   2  -3  -7  155.51    7.87
   3  -2  -7  188.45    7.57
  -1  -2   7  148.30    7.68
  -1   3  -7  140.69    8.59
  -3   1  -7  150.54    8.06
   1   2  -7  177.51   10.31
  -2  -1  -7  143.03    6.31
   2  -3  -7  158.21    7.05
   2  -3  -7  146.98    6.67
   3  -2  -7  136.84    8.90
   3  -2  -7  145.41    7.46
  -3   1  -7  204.49   11.77
  -1  -2   7  137.86    6.85
   1  -3   7  144.28    6.22
   2   1  10  620.85   22.26
  -1  -2  10  529.81   15.32
   2  -3 -10  584.73   15.48
  -3   1 -10  528.92   17.50
   1   2 -10  574.26   19.90
  -2  -1 -10  536.78   16.12
  -1   3 -10  499.55   17.98
   1   2 -10  559.88   15.41
   2  -3 -10  556.53   14.74
   3  -2 -10  509.98   17.29
   2  -3 -10  549.60   13.32
  -1   3 -10  570.64   11.06
   3  -2 -10  552.79   15.63
  -3   1 -10  619.80   19.30
   1  -3  10  530.26   11.39
  -1  -2  10  497.60   12.54
  -2  -1 -10  568.47   18.00
   1  -3  13 1508.63   18.99
   2  -3 -13 1575.57   26.21
  -2   3  13 1550.47   15.27
  -1  -2  13 1451.11   26.91
  -2  -1 -13 1586.87   33.32
  -1   3 -13 1422.62   33.82
   1   2 -13 1638.51   36.45
  -3   1 -13 1448.53   33.10
   2  -3 -13 1543.68   22.91
   3  -2 -13 1439.95   29.46
   2  -3 -13 1532.68   26.78
   1   2 -13 1523.56   26.80
  -1   3 -13 1474.48   20.22
   3  -2 -13 1427.44   26.68
  -1  -2  13 1376.82   19.83
  -2  -1 -13 1517.39   32.38
  -2  -1 -13 1590.59   30.52
  -3   1 -13 1530.10   30.06
  -1  -2  16  313.60   13.22
   2  -3 -16  328.18   12.34
   2   1  16  284.19   13.98
   1   2 -16  314.43   17.31
  -3   1 -16  300.03   16.34
  -1   3 -16  287.04   16.60
  -2  -1 -16  326.10   17.38
  -1   3 -16  311.69   10.53
   1   2 -16  315.56   12.76
   3  -2 -16  305.40   14.18
   3  -2 -16  305.89   13.10
   2  -3 -16  308.43   13.15
   2  -3 -16  332.94   10.34
  -3   1 -16  330.32   14.75
  -1  -2  16  284.90    8.52
  -2  -1 -16  295.19   13.95
  -2  -1 -16  325.51   13.40
  -1  -2  19 1137.72   26.66
  -3   2  19 1154.95   23.54
   2   1  19 1001.35   25.78
  -2  -1 -19 1331.27   39.13
   1   2 -19 1205.65   36.19
  -1   3 -19 1140.05   36.12
  -3   1 -19 1046.56   31.03
   2  -3 -19 1155.80   27.03
   3  -2 -19 1177.82   29.16
   1   2 -19 1139.19   25.35
  -1   3 -19 1147.28   22.26
   3  -2 -19 1087.88   25.97
  -2  -1 -19 1223.15   30.38
   2  -3 -19 1200.02   20.84
  -1  -2  19 1007.09   14.84
  -3   1 -19 1184.23   28.93
  -2  -1 -19 1142.56   24.62
   2   1  22  386.05   16.60
  -3   2  22  441.02   14.97
  -2  -1 -22  511.33   27.00
   1   2 -22  479.86   24.27
  -3   1 -22  383.01   19.78
  -1   3 -22  402.04   21.25
   3  -2 -22  409.87   16.73
   2  -3 -22  448.40   17.92
  -1   3 -22  455.79   15.38
   1   2 -22  459.50   17.09
  -3   1 -22  439.16   18.35
  -2  -1 -22  449.75   15.33
  -2  -1 -22  554.37   22.69
   2  -3 -22  466.91   14.06
  -1  -2  22  375.73    7.98
  -2   3  25 1111.44   22.76
   2   1  25  765.90   24.29
  -3   2  25  855.56   21.69
  -2  -1 -25  999.51   39.44
  -3   1 -25  750.41   29.30
   1   2 -25  902.97   35.30
  -1   3 -25  747.66   30.25
   3  -2 -25  865.79   25.38
   2  -3 -25  893.66   26.65
  -1   3 -25  892.12   23.19
   1   2 -25  878.35   24.71
  -3   1 -25  833.40   19.25
  -2  -1 -25 1191.56   35.17
  -2  -1 -25  896.99   21.46
  -3   2  28  168.53   10.05
  -2   3  28  205.85   10.09
   2   1  28  160.97   11.70
  -3   1 -28  157.38   14.04
  -2  -1 -28  175.00   16.57
   1   2 -28  164.91   16.16
  -1   3 -28  145.66   14.27
   3  -2 -28  175.38   11.82
  -1   3 -28  177.74   11.08
   1   2 -28  168.10   11.23
   2  -3 -28  183.92   12.53
  -3   1 -28  223.56   10.95
  -2  -1 -28  177.56    9.32
  -2  -1 -28  220.14   15.23
  -2   3  31  131.01    7.98
   2   1  31  124.73   10.64
  -3   1 -31  109.47   12.46
  -2  -1 -31  116.29   13.01
  -1   3 -31  105.27   12.50
   1   2 -31  141.83   15.72
   3  -2 -31  110.04   10.64
   1   2 -31  113.14    9.37
  -2  -1 -31  119.93   11.12
   2  -3 -31  121.56   10.52
  -3   1 -31  119.55   10.13
  -1   3 -31  110.42    9.05
  -2  -1 -31  127.78   11.55
  -2  -1 -31  117.34    7.67
  -3   1 -31  140.70    8.19
   2   1  34   15.12    4.02
  -2  -1 -34   12.35    2.49
  -1   3 -34   18.53    7.78
  -2  -1 -34   11.50    5.44
  -3   1 -34    9.43    3.98
   1   2 -34   21.08    9.27
  -2  -1 -34   13.50    3.48
   1   2 -34   11.62    3.06
   3  -2 -34   10.71    1.98
   2  -3 -34   12.65    3.66
  -3   1 -34   11.38    3.83
  -1   3 -34   10.46    2.86
  -2  -1 -34   10.60    2.74
   2   1  37  215.27   15.28
   2  -3 -37  190.82   14.02
  -2  -1 -37  204.48   14.92
  -1   3 -37  190.57   13.14
   3  -2 -37  178.31   13.32
   1   2 -37  209.36   14.33
  -3   1 -37  182.43   13.43
  -3   1 -37  167.64   16.01
  -2  -1 -37  167.50   16.71
  -1   3 -37  177.52   16.74
   1   2 -37  225.80   21.58
   2   1  40   81.01    9.52
  -3   1 -40   95.56    9.92
   3  -2 -40   91.20    9.94
  -1   3 -40  100.32    9.77
  -2  -1 -40  103.35   10.75
   2  -3 -40   98.80   10.56
   1   2 -40   98.14   10.33
  -2  -1 -40   53.90   10.13
  -3   1 -40   67.14   10.80
  -1   3 -40   66.57   10.52
   1   2 -40   87.46   14.32
   2   1  43 1023.45   34.73
  -3   1 -43  818.09   37.10
  -2  -1 -43  830.66   39.12
   1   2 -43 1077.71   49.71
  -1   3 -43  788.44   37.48
   2  -3 -43 1001.33   34.43
  -2  -1 -43 1032.60   35.26
  -1   3 -43 1001.69   32.43
  -3   1 -43  982.94   32.86
   1   2 -43 1029.59   34.27
   3  -2 -43  967.33   33.17
  -3   1 -46  258.40   21.76
   1   2 -46  301.70   26.51
  -1   3 -46  232.94   20.41
  -2  -1 -46  256.94   22.55
  -1   3 -46  263.88   17.17
   3  -2 -46  274.49   18.11
  -3   1 -46  270.58   17.71
  -2  -1 -46  270.06   18.49
   2  -3 -46  270.86   18.57
   1   2 -46  260.63   17.98
   1   2 -49   50.45   10.90
  -3   1 -49   48.09   10.09
  -2  -1 -49   50.96   10.96
  -1   3 -49   49.97   10.42
  -2  -1 -49   85.22   10.63
  -3   1 -49   82.02    9.90
   1   2 -49   84.07   10.66
   2  -3 -49   83.18   10.42
   3  -2 -49   79.03   10.63
  -1   3 -49   82.47    9.88
  -2  -1 -52   93.13   14.67
   1   2 -52   94.04   14.86
  -1   3 -52   80.50   12.56
  -3   1 -52   97.88   14.13
  -1   3 -52   90.99   10.43
  -2  -1 -52   96.68   11.02
  -3   1 -52   98.66   10.83
   2  -3 -52   93.25   11.25
   3  -2 -52   94.26   11.18
   1   2 -52   97.64   11.08
  -2  -1 -55   17.15    6.24
  -3   1 -55   13.87    6.48
  -1   3 -55   12.98    5.73
   1   2 -55   16.88    6.29
  -2  -1 -55   31.48    7.77
  -3   1 -55   29.44    6.81
   2  -3 -55   25.96    6.77
   1   2 -55   28.14    6.31
   3  -2 -55   26.85    5.90
  -1   3 -55   25.35    6.13
  -2  -1 -58  266.66   25.05
  -1   3 -58  295.45   25.24
   1   2 -58  312.86   27.08
  -3   1 -58  307.14   26.36
  -3   1 -58  350.49   21.92
   2  -3 -58  341.68   22.51
   1   2 -58  347.92   22.34
  -1   3 -58  345.42   20.86
  -2  -1 -58  351.22   23.19
   3  -2 -58  329.78   21.68
   1   2 -61  340.43   28.80
  -3   1 -61  335.29   28.97
  -2  -1 -61  287.74   25.61
  -1   3 -61  318.14   26.52
  -1   3 -61  321.58   20.45
  -3   1 -61  321.64   21.67
  -2  -1 -61  352.48   23.48
   2  -3 -61  347.17   22.80
   1   2 -61  344.55   21.93
   3  -2 -61  335.17   22.23
  -1   3 -64    9.23    1.98
  -3   1 -64   16.17    7.10
   1   2 -64   12.67    5.45
   3  -2 -64   15.36    5.06
   2  -3 -64   18.69    4.77
  -3   1 -64   18.14    5.14
  -2  -1 -64   16.37    5.43
   1   2 -64   23.98    6.25
  -3   1 -67   68.01   14.64
   1   2 -67   70.69   10.40
  -2  -1 -67   62.96    9.95
  -3   1 -67   66.17   10.07
  -3   3 -66  193.76   22.91
   0  -3 -66  196.23   18.37
   3   0 -66  189.76   17.67
   0  -3 -63    7.33    3.66
   3   0 -63    4.98    1.07
  -3   3 -60   42.44    9.95
   3   0 -60   36.14    6.22
  -3   3 -60   34.16    5.50
   0  -3 -60   37.88    7.52
  -3   3 -57    3.85    4.47
   3   0 -57   -8.39   13.92
  -3   3 -57   -1.90    1.83
   3   0 -57    0.11    1.88
   0  -3 -57   -0.15    4.76
  -3   3 -54   62.95   12.23
   3   0 -54   76.39   12.82
   0  -3 -54   60.87    9.57
   3   0 -54   72.33   10.07
  -3   3 -54   65.57    8.53
   3   0 -51   -2.45    8.27
  -3   3 -51    4.58    0.83
  -3   3 -51    0.97    3.05
   3   0 -51    2.30    2.43
   0  -3 -51   -0.45    4.35
  -3   3 -48   60.08   11.36
   3   0 -48   73.73   12.56
   0  -3 -48   76.15   10.09
  -3   3 -48   67.33    8.08
   3   0 -48   69.61   10.00
   3   0 -45    1.01    2.10
  -3   3 -45    1.25    1.60
  -3   3 -45    1.75    1.69
   0  -3 -45   -2.73    3.41
   3   0 -45    4.19    3.95
   3   0 -42   31.70    8.72
  -3   3 -42   13.55    5.82
   3   0 -42   24.85    4.93
  -3   3 -42   21.28    4.77
   0  -3 -42   20.23    4.61
  -3   3 -39   -1.38    3.05
   3   0 -39    0.98    4.55
   3   0 -39    2.96    1.09
   0  -3 -39    1.54    0.67
  -3   3 -39    3.31    1.87
   0  -3 -36   22.33    3.44
   0   3  36   18.73    3.86
  -3   3 -36   17.72    4.99
   3   0 -36   26.60    6.79
  -3   3 -36   22.73    4.02
   3   0 -36   27.12    5.96
   0  -3 -36   20.91    4.94
   0  -3 -36   28.33    5.54
   0   3  33    4.49    2.22
  -3   0  33    0.92    2.00
   0  -3 -33    2.27    1.58
   3   0 -33    1.34    1.75
  -3   3 -33    0.88    3.34
   3   0 -33    5.33    2.81
  -3   3 -33    7.33    2.03
   0  -3 -33    3.43    2.77
   0  -3 -33    2.05    1.00
  -3   0  30  430.24   19.09
   0   3  30  454.40   19.79
  -3   3 -30  368.48   23.68
   3   0 -30  411.56   25.83
  -3   3 -30  420.09   17.25
   3   0 -30  402.74   18.83
   0  -3 -30  424.37   19.55
   0  -3 -30  426.39   15.34
   0  -3 -27    2.06    1.73
   0   3  27    2.80    1.22
  -3   0  27    5.48    2.18
   3   0 -27    4.15    3.54
  -3   3 -27    1.69    1.48
   3   0 -27    1.75    0.88
   0  -3 -27    0.58    1.06
  -3   3 -27    0.89    0.74
   0  -3 -27    1.64    1.45
  -3   0  24  411.60   17.59
   3   0 -24  425.47   23.91
  -3   3 -24  415.49   24.20
   3   0 -24  405.82   17.72
  -3   3 -24  395.36   14.90
   0  -3 -24  392.53   17.58
   0  -3 -24  414.93   17.29
   0  -3 -24  384.44   14.24
   0  -3 -21    2.16    0.93
  -3   3 -21    2.01    0.29
   3   0 -21    1.37    1.94
  -3   3 -21    3.02    1.44
   3   0 -21    4.78    2.40
   0  -3 -21    2.28    1.44
  -3   0  18 2257.90   38.60
  -3   3 -18 2110.86   48.12
   3   0 -18 2182.08   48.44
   3   0 -18 2250.01   43.84
   3   0 -18 2249.94   39.35
   0  -3 -18 2306.10   39.48
   0  -3 -18 2183.92   33.98
   0  -3 -15    1.14    0.89
  -3   3 -15    3.05    2.52
   3   0 -15    0.11    0.49
   3   0 -15    1.03    1.54
  -3   3 -12  170.56   11.69
   3   0 -12  185.11   12.38
   3   0 -12  182.27   10.15
   3   0 -12  164.24   11.07
   0  -3 -12  168.98    9.14
   0  -3  -9    2.61    0.59
  -3   3  -9    1.88    1.46
  -3   3  -9    0.34    1.40
   3   0  -9    3.85    1.58
  -3   0   9    3.05    1.52
  -3   3  -6  391.60   14.42
   0   3   6  400.06   12.24
   3   0  -6  393.29   16.15
   0  -3  -6  427.06   14.18
  -3   0   6  414.42   12.38
   0   3   3    1.76    0.45
  -3   3  -3    1.39    1.40
   0  -3  -3    2.04    1.46
   0  -3  -3    1.98    1.26
   3   0  -3    2.09    1.53
   0   3   0  983.73   18.02
  -3   3   0  956.49   20.53
   0  -3   0  983.70   15.48
   3  -3   0  966.80   13.73
   3   0   0 1045.33   26.06
   0  -3   0 1047.79   21.03
   0  -3   0  973.94   19.94
   0  -3   3    2.86    1.37
   0  -3   3    0.48    0.49
   3   0   3    2.50    1.65
   0   3  -3    5.26    1.36
  -3   3   3    2.00    1.32
   0   3  -3    1.73    0.96
   3  -3  -3    2.47    1.25
   0  -3   6  690.74   16.05
   0   3  -6  664.83   17.83
  -3   0  -6  712.72   14.28
   3  -3  -6  722.29   15.39
   0  -3   6  716.36   16.17
   0  -3   9    1.87    0.29
   0  -3   9    1.80    0.67
   3   0   9    2.44    0.94
   0   3  -9    2.99    2.94
  -3   0  -9    5.15    1.70
   3  -3  -9    5.52    1.99
  -3   0  -9    2.00    0.33
   3  -3  -9    3.83    1.90
   0  -3  12  239.72   10.83
   3   0  12  198.98   11.47
   0   3 -12  210.47   12.68
  -3   0 -12  192.12   10.16
   0   3 -12  231.57    9.30
   3  -3 -12  214.89   10.76
   3  -3 -12  237.95   10.47
   0  -3  12  233.10    8.15
  -3   0 -12  231.18   12.12
   0  -3  15    0.83    0.44
   3   0  15    3.90    1.52
  -3   0 -15    1.75    1.63
   0   3 -15    4.04    1.95
   3  -3 -15    1.79    0.72
  -3   0 -15    1.78    1.64
   3  -3 -15    1.86    0.86
  -3   3  18 1177.55   20.71
   3   0  18 1156.06   30.07
  -3   0 -18 1105.58   29.75
   0   3 -18 1177.38   35.22
   3  -3 -18 1120.12   26.20
   3  -3 -18 1181.02   26.64
   0   3 -18 1148.99   23.24
   0  -3  18 1104.56   15.28
  -3   3  21    2.04    1.13
  -3   0 -21    5.12    1.35
   0  -3  21    2.77    0.67
  -3   0 -21    1.93    1.09
   0   3 -21   -0.11    1.63
   0   3 -21    5.90    1.81
   3  -3 -21    2.35    2.41
   3  -3 -21    6.09    2.51
  -3   0 -21    5.75    3.05
  -3   3  24 1199.70   22.54
  -3   0 -24 1110.68   34.16
   0   3 -24 1317.54   41.63
   0   3 -24 1264.76   27.98
   3  -3 -24 1241.72   30.54
  -3   0 -24 1512.40   38.88
  -3   0 -24 1562.22   33.72
  -3   0 -27    2.84    1.02
   0   3 -27    1.82    2.87
  -3   0 -27    2.87    0.60
   3  -3 -27    3.67    1.71
   0   3 -27    7.10    2.13
  -3   0 -27    4.95    2.48
  -3   0 -30  436.50   23.38
   0   3 -30  533.27   28.89
   0   3 -30  586.22   21.31
   3  -3 -30  571.25   22.44
  -3   0 -30  667.69   20.03
  -3   0 -30  665.34   26.29
  -3   0 -33    2.66    0.75
   0   3 -33    4.24    1.56
   3  -3 -33   -0.13    1.99
  -3   0 -33    3.50    2.11
   0   3 -33    3.50    2.69
   0   3 -36   49.23    6.22
   3  -3 -36   44.69    6.77
  -3   0 -36   48.78    7.59
  -3   0 -36   28.23    6.38
   0   3 -36   41.79    9.09
  -3   0 -39    4.42    2.33
   0   3 -39    6.79    3.81
   3  -3 -39    2.38    0.92
   0   3 -39   -0.01    1.09
  -3   0 -39    6.51    0.92
   0   3 -42   28.00    4.95
  -3   0 -42   30.83    6.21
   3  -3 -42   29.10    5.32
  -3   0 -42   35.68    8.03
   0   3 -42   25.62    7.13
  -3   0 -45    3.23    2.95
   3  -3 -45    4.39    2.70
   0   3 -45    4.93    1.98
   0   3 -45    4.13    0.74
  -3   0 -45   -0.19    1.51
   3   0  48   43.85    7.07
  -3   0 -48   43.65    9.18
   0   3 -48   41.40    8.48
  -3   0 -48   48.84    7.75
   3  -3 -48   38.05    5.71
   0   3 -48   46.40    8.30
   0   3 -51    0.58    3.68
  -3   0 -51    0.58    1.98
  -3   0 -51   -0.98    1.22
   0   3 -51    1.81    1.68
   3  -3 -51   -0.92    3.35
  -3   0 -54    2.91    2.54
   0   3 -54    1.00    3.48
   0   3 -54    3.11    3.08
  -3   0 -54    0.72    3.46
   3  -3 -54    7.07    3.32
  -3   0 -57    3.00    3.96
   0   3 -57    4.89    2.45
   3  -3 -57    2.52    1.66
  -3   0 -57   -2.72    0.62
   0   3 -57    1.36    2.45
   0   3 -60    9.95    4.25
  -3   0 -60   13.92    3.71
   3  -3 -60   15.74    4.06
   0   3 -60   11.52    3.55
  -3   0 -60   14.78    2.86
  -3   0 -63   -2.86    1.80
   0   3 -63    0.24    3.47
   3  -3 -63   -1.05    4.12
   0   3 -63    4.02    3.85
  -3   0 -63    2.74    2.66
  -3   0 -66  121.27   17.32
  -3   0 -66  128.64   13.86
   4  -2   0  104.56    8.04
  -4   2   0   68.90    5.23
  -2   4   0   83.33    6.51
   2   2   0   69.55    3.23
   2  -4   0   90.40    3.74
   2   2   0   74.56    6.02
   2  -4   0   80.86    5.93
  -2  -2   0   78.19    6.80
  -4   2   0  118.84    7.60
   2  -4   3 1054.87   20.82
  -2   4  -3 1077.27   24.11
  -4   2   3 1046.08   22.23
  -2   4   3 1062.91   23.51
  -4   2  -3 1084.83   20.28
   2   2   3 1036.58   11.89
   2   2  -3 1112.03   17.69
   2   2   3 1095.12   23.12
   2   2  -3 1062.28   22.97
   2  -4  -3 1119.06   15.75
   4  -2  -3 1189.96   29.72
   2  -4  -3 1059.18   18.34
  -2  -2  -3 1013.49   24.75
  -2  -2   3 1075.67   23.49
   2  -4  -3 1032.17   21.47
  -4   2  -3 1219.70   24.30
  -2   4   6 2360.67   37.43
  -2   4  -6 2346.24   37.75
  -4   2  -6 2377.86   32.12
   2  -4   6 2413.16   31.84
   2   2   6 2337.00   20.23
   2   2  -6 2369.98   30.95
   2   2  -6 2351.63   36.48
   2  -4  -6 2398.80   27.02
   4  -2  -6 2385.72   33.69
   4  -2  -6 2383.07   43.18
   2   2   6 2426.77   34.56
  -2  -2  -6 2453.21   39.90
   2  -4  -6 2390.94   33.14
   2  -4  -6 2212.20   25.75
  -2  -2   6 2315.96   34.06
  -4   2  -6 2574.48   35.82
  -2   4  -9 4318.42   55.13
  -4   2  -9 4428.11   51.72
   2   2  -9 4338.59   48.42
   2   2   9 4432.66   45.52
   4  -2  -9 4308.47   47.43
   2   2  -9 4260.43   51.80
   2  -4  -9 4444.77   33.55
   2  -4  -9 4339.44   40.41
   4  -2  -9 4250.27   57.10
  -2  -2  -9 4420.91   53.56
  -4   2  -9 4454.14   49.36
   2  -4  -9 4243.18   45.05
  -2  -2  12  908.05   23.18
  -2   4 -12  919.85   27.32
  -4   2 -12  960.51   26.76
   2   2 -12  938.47   24.95
   4  -2 -12  946.51   23.73
   2  -4 -12  974.00   15.85
   2  -4 -12  920.72   20.48
   4  -2 -12  880.48   26.30
  -2   4 -12  902.03   12.87
  -2  -2 -12  936.21   24.71
   2  -4 -12  886.16   21.07
  -4   2 -12  952.31   24.23
  -4   2  12 1023.02   15.07
  -2  -2  15 3705.51   48.76
   2   2 -15 3735.83   54.14
  -4   2 -15 3859.77   58.96
  -2   4 -15 3602.66   58.03
   2  -4 -15 3585.39   29.66
   2   2 -15 3884.21   49.16
   4  -2 -15 3492.68   52.96
  -2   4 -15 3642.48   30.83
   2  -4 -15 3624.89   44.33
   4  -2 -15 3715.68   48.72
  -2  -2 -15 3696.94   48.61
   2  -4 -15 3686.11   43.67
  -4   2 -15 3728.60   49.96
  -2  -2 -18   15.20    3.14
  -2  -2  18   16.18    2.67
   2   2  18   17.65    4.45
   2  -4 -18   18.42    3.35
  -4   2 -18   17.87    4.83
   2   2 -18   19.33    4.33
  -2   4 -18   13.05    3.89
  -2  -2 -18   12.29    2.21
   4  -2 -18   16.63    3.38
   2  -4 -18   18.80    3.30
   4  -2 -18   15.86    3.78
  -2   4 -18   16.99    2.62
   2   2 -18   16.81    3.68
   2  -4 -18   16.25    2.95
  -4   2 -18   17.09    3.83
  -2  -2 -18   17.42    3.27
   2   2  21  297.22   18.89
  -2  -2  21  251.76   13.77
  -4   2 -21  263.27   18.40
   2   2 -21  213.77   15.11
  -2  -2 -21  247.43   18.17
  -2   4 -21  218.67   16.61
   2   2 -21  256.06   13.44
   2  -4 -21  247.23   13.16
  -2   4 -21  271.41   11.12
   4  -2 -21  255.64   13.71
   4  -2 -21  247.39   15.24
   2  -4 -21  268.45   12.29
  -2  -2 -21  243.67   13.75
  -2  -2 -21  258.69   12.82
  -4   2  24 4232.30   53.35
   2   2  24 3874.37   59.15
  -2  -2  24 4279.86   59.82
   2  -4 -24 4230.92   49.82
   2   2 -24 4183.35   70.93
  -2  -2 -24 4533.11   84.81
  -4   2 -24 4119.14   73.04
  -2   4 -24 4190.71   76.76
  -2   4 -24 4175.50   47.37
   2   2 -24 4180.54   56.48
   2  -4 -24 4042.26   56.26
   4  -2 -24 4382.05   65.70
   4  -2 -24 4115.12   56.89
  -2  -2 -24 3983.63   56.72
  -2  -2 -24 4168.72   51.66
   2  -4 -24 4646.70   49.90
   2   2  27  383.84   18.11
  -2  -2  27  446.69   19.71
  -4   2  27  409.95   16.82
   2  -4 -27  436.07   16.46
  -2   4 -27  413.39   23.81
  -2  -2 -27  507.88   30.92
  -4   2 -27  424.15   24.13
   2   2 -27  446.17   24.50
   4  -2 -27  416.13   18.83
  -2   4 -27  414.49   16.05
   2   2 -27  416.57   18.51
   2  -4 -27  411.47   18.76
  -2  -2 -27  361.66   16.83
   2  -4 -27  447.98   15.77
  -2  -2 -27  405.95   15.96
   2   2  30   25.54    5.15
  -2  -2 -30   30.92    4.23
  -4   2  30   26.39    4.39
   2  -4 -30   31.42    4.61
  -2   4 -30   26.36    6.37
   2   2 -30   30.32    7.40
  -4   2 -30   27.10    6.55
  -2  -2 -30   34.34    8.52
   2  -4 -30   32.26    6.48
   4  -2 -30   31.93    6.63
  -2   4 -30   26.82    4.26
   2   2 -30   28.92    4.91
  -2  -2 -30   26.70    4.69
   2  -4 -30   33.40    4.38
  -4   2  33 1693.82   35.92
   2   2  33 1564.92   37.86
  -2   4 -33 1595.01   48.79
  -2  -2 -33 1766.10   60.11
  -4   2 -33 1668.98   50.31
   2   2 -33 1837.94   54.58
  -2   4 -33 1757.90   37.18
   4  -2 -33 1673.28   40.03
  -4   2 -33 1738.24   39.66
   2   2 -33 1753.31   40.75
   2  -4 -33 1792.34   42.05
  -2  -2 -33 1826.28   33.63
  -2  -2 -33 1703.48   38.91
   2   2  36  638.33   24.97
  -4   2 -36  645.78   32.23
  -2  -2 -36  647.56   35.04
  -2   4 -36  576.90   30.58
   2   2 -36  735.66   36.12
   2   2 -36  761.89   27.75
   4  -2 -36  731.35   27.33
  -2  -2 -36  832.48   31.73
  -4   2 -36  739.05   26.40
  -2   4 -36  784.33   26.01
   2  -4 -36  770.20   28.66
  -2  -2 -36  821.02   29.27
  -2  -2 -36  809.49   22.39
   2   2  39  923.97   31.31
   2   2 -39 1084.23   45.62
  -2   4 -39  867.80   37.79
  -2  -2 -39  862.32   40.91
  -4   2 -39  895.32   38.87
   2  -4 -39 1050.59   34.59
   2   2 -39 1017.53   33.42
  -2  -2 -39 1117.49   37.33
  -4   2 -39  989.34   31.36
  -2   4 -39 1048.63   31.11
   4  -2 -39 1001.25   33.09
  -2  -2 -39 1247.33   38.59
   2   2  42  811.42   30.52
  -4   2 -42  748.93   36.48
  -2  -2 -42  673.31   36.48
  -2   4 -42  713.13   34.83
   2   2 -42  915.93   43.92
  -2  -2 -42  854.62   33.51
  -4   2 -42  797.72   29.03
  -2   4 -42  819.62   28.47
   4  -2 -42  797.77   30.52
   2  -4 -42  823.97   31.58
   2   2 -42  813.44   30.78
  -2   4 -45   43.46    8.59
  -2  -2 -45   47.96    8.38
  -4   2 -45   51.88   10.10
   2   2 -45   60.64   12.38
  -2   4 -45   90.18    9.54
   2   2 -45   92.55   10.96
   2  -4 -45   92.88   10.81
  -2  -2 -45   92.12   10.67
   4  -2 -45   92.63   10.85
  -4   2 -45   98.20   10.29
  -2  -2 -48   -1.41    7.36
  -2   4 -48    5.99    3.95
  -4   2 -48    6.42    2.70
   2   2 -48    2.84    0.70
   2  -4 -48   -1.41    3.74
  -2  -2 -48    6.15    1.98
   2   2 -48    6.59    1.71
   4  -2 -48    4.22    1.97
  -4   2 -48    6.97    2.94
  -2   4 -48    4.91    1.38
  -2  -2 -51  167.53   18.10
  -4   2 -51  233.89   21.56
  -2   4 -51  226.54   21.10
  -2  -2 -51  241.96   18.71
   2  -4 -51  228.07   17.95
  -4   2 -51  207.88   15.91
   2   2 -51  252.30   18.71
   4  -2 -51  224.42   17.74
  -2   4 -51  215.04   16.03
   2   2 -54  255.30   26.95
  -2   4 -54  179.33   19.14
  -4   2 -54  188.70   20.16
   2  -4 -54  240.86   18.85
  -2  -2 -54  261.04   20.11
   2   2 -54  255.36   19.00
  -2   4 -54  249.24   17.29
   4  -2 -54  248.03   18.47
  -4   2 -54  251.50   18.33
   2   2 -57  691.23   42.60
  -2   4 -57  547.37   33.76
  -4   2 -57  603.73   36.59
  -2  -2 -57  660.29   32.74
  -4   2 -57  588.51   27.97
   2   2 -57  624.29   30.21
   2  -4 -57  598.05   29.77
   4  -2 -57  617.23   30.15
  -2   4 -60  402.43   29.90
  -4   2 -60  433.21   32.78
   2   2 -60  453.99   35.40
   4  -2 -60  437.69   25.74
   2   2 -60  457.08   26.25
  -4   2 -60  430.87   24.27
  -2  -2 -60  480.91   28.27
   2  -4 -60  438.10   25.96
  -4   2 -63  223.46   23.94
   2   2 -63  185.98   22.93
  -2   4 -63  196.44   21.15
   2  -4 -63  225.85   19.02
  -2  -2 -63  254.06   21.44
   2   2 -63  238.53   18.77
  -4   2 -63  242.30   18.68
   4  -2 -63  234.93   19.26
  -4   2 -66   18.89    8.88
  -2  -2 -66   16.85    5.39
   2   2 -66   20.11    4.41
   2   2 -69   22.79    6.31
   3   1 -67  407.16   25.63
  -4   3 -64    2.34    2.02
  -3   4 -64    3.62    1.53
  -1  -3 -64    6.29    4.98
   3   1 -64    6.24    5.23
   1  -4 -64    4.14    2.65
   4  -1 -64    1.34    1.76
  -4   3 -61   29.09    8.16
   3   1 -61   24.07    4.66
  -3   4 -61   33.61    8.88
   1  -4 -61   29.90    5.78
  -1  -3 -61   35.56    7.12
   4  -1 -61   32.63    7.29
   3   1 -61   30.33    6.93
   3   1 -58  402.76   35.33
  -3   4 -58  313.90   26.99
  -4   3 -58  330.06   27.49
   3   1 -58  365.38   23.10
  -1  -3 -58  374.39   25.02
   4  -1 -58  360.06   22.95
   1  -4 -58  353.72   23.23
  -4   3 -58  327.66   20.16
  -4   3 -55   82.23   13.89
   3   1 -55   86.45   17.76
  -3   4 -55   67.16   11.67
   1  -4 -55   72.74   10.73
   4  -1 -55   68.85    9.74
  -1  -3 -55   79.89   11.66
  -4   3 -55   64.52    8.88
   3   1 -55   77.03   10.03
  -3   4 -52  183.98   19.11
  -4   3 -52  155.20   18.36
   3   1 -52  209.67   24.25
  -3   4 -52  180.96   14.34
  -4   3 -52  166.90   13.64
  -1  -3 -52  200.03   17.51
   1  -4 -52  180.92   15.86
   4  -1 -52  176.78   15.25
   3   1 -52  189.88   16.20
  -3   4 -49  517.07   31.87
   3   1 -49  597.54   39.09
  -4   3 -49  509.65   32.57
  -4   3 -49  555.59   24.57
  -1  -3 -49  625.02   29.94
  -3   4 -49  574.96   24.99
   4  -1 -49  602.89   28.29
   1  -4 -49  616.20   29.23
   3   1 -49  600.15   28.29
   3   1 -46  659.63   39.02
  -4   3 -46  544.33   32.89
  -3   4 -46  522.92   31.44
  -4   3 -46  549.13   23.66
   1  -4 -46  591.11   27.83
  -1  -3 -46  607.89   28.84
  -3   4 -46  559.50   23.90
   3   1 -46  576.17   27.26
   4  -1 -46  566.13   26.71
   3   1 -43  140.54   17.08
  -4   3 -43  107.25   14.10
  -3   4 -43  105.27   14.05
   4  -1 -43  111.50   11.50
  -4   3 -43  110.60   10.55
   1  -4 -43  119.90   12.12
  -1  -3 -43  122.40   12.65
   3   1 -43  118.40   11.68
  -3   4 -43  115.50   10.39
  -3   4 -40    4.34    4.82
  -4   3 -40    9.88    3.38
   3   1 -40    3.58    3.74
   3   1 -40    8.93    3.56
   4  -1 -40    8.27    2.90
  -1  -3 -40    7.57    3.31
  -3   4 -40   10.41    3.47
   1  -4 -40    5.42    0.97
  -4   3 -40    4.43    1.13
  -1  -3 -40   12.51    4.31
  -4   1  37 1079.95   31.79
   1   3  37 1068.16   31.87
   3   1 -37 1205.23   46.96
  -3   4 -37 1060.46   41.93
  -4   3 -37 1098.12   43.73
  -3   4 -37 1070.07   30.64
  -1  -3 -37 1139.24   35.96
  -4   3 -37 1025.37   29.86
   1  -4 -37 1112.38   34.36
   3   1 -37 1099.32   34.16
   4  -1 -37 1073.24   33.76
   1  -4 -37 1212.06   31.68
  -1  -3 -37 1126.61   26.79
  -1  -3 -37 1243.68   35.42
   1  -4 -37 1201.44   27.99
  -4   1  34   28.36    5.11
   1  -4 -34   27.41    4.15
   1   3  34   25.14    4.87
  -3  -1  34   24.97    4.72
  -1  -3 -34   24.77    3.72
   3   1 -34   20.17    4.08
  -3   4 -34   24.60    6.93
  -4   3 -34   28.18    6.11
  -3   4 -34   29.33    5.09
   4  -1 -34   27.11    5.43
   3   1 -34   22.43    5.01
  -1  -3 -34   26.49    5.66
  -4   3 -34   28.77    5.04
   1  -4 -34   22.83    4.39
  -1  -3 -34   21.84    4.21
   1  -4 -34   29.96    4.78
   1   3  31  562.85   23.12
  -4   1  31  632.58   23.32
  -3  -1  31  669.88   25.54
   3   1 -31  610.85   30.46
  -3   4 -31  577.53   29.51
  -4   3 -31  580.66   30.22
   3   1 -31  646.42   24.80
  -3   4 -31  676.93   22.25
   4  -1 -31  621.93   24.04
   1  -4 -31  641.15   24.23
  -1  -3 -31  678.21   25.98
  -4   3 -31  625.19   21.54
   1  -4 -31  771.25   25.40
  -1  -3 -31  670.18   20.47
   1  -4 -31  676.98   20.68
  -1  -3 -31  585.85   21.03
   1   3  28  651.49   27.98
  -3  -1  28  547.42   22.34
  -4   1  28  544.21   21.02
  -4   3 -28  537.00   28.36
   3   1 -28  568.17   28.20
  -3   4 -28  523.43   28.42
   3   1 -28  539.80   22.15
   4  -1 -28  519.01   21.44
   1  -4 -28  516.15   21.22
  -4   3 -28  509.46   18.81
  -3   4 -28  571.85   19.24
  -1  -3 -28  484.40   19.23
   1  -4 -28  697.80   24.44
   1  -4 -28  538.94   18.51
  -1  -3 -28  546.61   18.53
  -3  -1  25   76.57    8.40
  -4   1  25   69.72    7.39
   3   1 -25   55.99    8.19
  -3   4 -25   62.32    9.47
  -4   3 -25   69.88   10.14
   1  -4 -25   72.46    7.69
   3   1 -25   79.97    8.19
  -3   4 -25   81.55    6.78
   4  -1 -25   73.22    8.08
   1  -4 -25   72.62    6.72
  -1  -3 -25   72.47    6.72
  -1  -3 -25   71.51    7.69
   1  -4 -25   76.47    7.26
  -4   1  22   84.76    7.89
  -3  -1  22   81.41    7.74
   3   1 -22   80.23    9.72
  -4   3 -22   93.43   11.04
  -3   4 -22   82.76   10.62
   3   1 -22   85.03    8.69
   4  -1 -22   79.27    9.12
  -3   4 -22   83.13    6.27
   1  -4 -22   83.21    7.77
   4  -1 -22   86.89    8.29
  -1  -3 -22   79.24    7.71
  -1  -3 -22   81.80    7.20
   1  -4 -22   85.25    7.10
   1  -4 -22   93.87    7.39
  -3  -1  19 3032.75   47.89
  -4   3 -19 3098.71   60.17
  -3   4 -19 2953.11   58.77
   3   1 -19 3037.92   55.11
   4  -1 -19 2986.48   53.24
  -3   4 -19 3068.07   35.27
   1  -4 -19 2923.93   43.98
   4  -1 -19 3002.85   47.88
   3   1 -19 3053.31   47.93
  -1  -3 -19 2878.61   42.33
   1  -4 -19 3428.38   48.31
   1  -4 -19 2963.07   41.58
  -1  -3 -19 3281.00   53.42
  -3  -1  16  124.93    9.20
  -3   4 -16  130.19   11.62
   3   1 -16  126.43   10.56
  -4   3 -16  133.62   11.76
   4  -1 -16  126.77    9.32
   4  -1 -16  111.13    9.99
   3   1 -16  130.46    9.54
   3   1 -16  121.60   10.50
  -3   4 -16  120.81    6.17
  -1  -3 -16  115.86    8.36
   1  -4 -16  118.36    8.19
   1  -4 -13   19.95    3.47
  -1  -3 -13   18.74    3.51
   3   1 -13   10.70    2.57
  -3   4 -13   17.02    5.08
  -4   3 -13   14.42    3.27
   3   1 -13   15.55    2.90
   3   1 -13   14.17    3.35
  -3   4 -13   21.51    2.17
   4  -1 -13   17.16    3.59
  -4   1  13   17.65    2.51
   4  -1 -13   11.12    3.15
  -4   3 -10 2634.04   41.79
  -3   4 -10 2667.58   44.13
   3   1 -10 2723.12   41.29
  -3   4 -10 2668.84   44.99
  -4   3 -10 2741.59   44.09
  -3   4 -10 2797.70   19.30
   3   1 -10 2566.55   43.31
   4  -1 -10 2507.35   45.22
   4  -1 -10 2714.66   40.42
   1   3  10 2938.03   28.46
  -4   1  10 2742.37   31.27
  -3  -1  10 2571.41   35.77
   1  -4 -10 2644.38   37.31
  -1  -3 -10 2615.67   39.18
   1   3   7  251.54    9.13
  -1   4   7  257.19   11.88
  -4   3  -7  244.07   11.84
  -3   4  -7  246.18   12.73
   3   1  -7  248.29   11.06
   4  -1  -7  234.32   13.92
   3   1  -7  227.10   12.61
   1   3   7  243.21    7.82
  -3  -1   7  236.76   10.89
  -1  -3  -7  221.92   11.20
   1  -4  -7  229.89   10.78
   1   3   4  827.96   15.30
  -3   4  -4  799.65   21.55
  -1   4   4  806.27   19.82
  -4   3  -4  806.07   20.17
   3   1  -4  773.50   16.79
   1   3   4  794.45   14.82
   4  -1  -4  831.92   25.88
   3   1  -4  759.02   22.91
   1  -4  -4  772.90   18.01
   1  -4  -4  778.71   19.53
  -3  -1   4  766.87   19.67
  -1  -3  -4  780.63   20.86
  -1   4   1 2303.80   33.14
   4  -1  -1 2576.23   42.89
  -4   3  -1 2307.51   32.95
  -4   1   1 2251.42   26.49
  -3   4  -1 2290.64   35.44
   1   3   1 2296.00   25.98
   1   3   1 2320.68   28.05
   3  -4   1 2298.06   17.97
   3   1  -1 2303.94   39.95
   4  -1  -1 2532.62   45.80
  -1  -3  -1 2281.90   35.24
   1  -4  -1 2247.85   30.72
   1  -4  -1 2265.82   32.53
  -1  -3  -1 2271.06   34.62
  -1   4  -2 1347.92   26.10
  -3   4   2 1308.19   27.27
  -4   3   2 1330.63   25.75
  -4   1  -2 1378.33   19.01
   1   3  -2 1347.78   20.81
   3  -4  -2 1368.07   17.51
   3   1   2 1413.78   30.96
  -1  -3   2 1330.16   26.17
  -1  -3   2 1363.91   26.76
   1  -4   2 1330.57   24.17
  -4   1  -5   50.55    3.80
  -3   4   5   49.79    5.50
   4  -1   5   71.80    8.26
  -4   3   5   48.34    5.41
  -1  -3   5   45.72    4.17
   1   3  -5   46.56    4.67
  -1   4  -5   49.62    5.30
   4  -3  -5   63.42    4.87
   3  -4  -5   53.35    4.06
   3   1   5   54.82    6.20
   4  -3  -5   59.68    6.90
  -1  -3   5   48.15    4.94
   1  -4   5   48.12    4.50
  -1  -3   5   48.72    4.95
  -4   1  -5   50.11    5.81
  -1  -3   8  533.81   15.97
  -3   4   8  538.08   19.78
   4  -1   8  504.36   18.20
   1   3  -8  576.90   19.07
  -1   4  -8  548.45   18.72
  -4   1  -8  604.41   17.23
  -3  -1  -8  605.44   13.94
   4  -3  -8  571.36   16.30
   3  -4  -8  575.97   14.93
   4  -3  -8  566.85   20.17
  -1  -3   8  540.78   15.89
  -4   1  -8  509.94   17.64
   1  -4   8  532.89   14.35
   3   1  11 1555.89   38.60
   4  -1  11 1333.68   30.75
  -1  -3  11 1355.01   26.92
  -4   1 -11 1444.55   30.46
   1   3 -11 1709.76   39.04
  -1   4 -11 1374.45   31.81
  -3  -1 -11 1639.56   30.03
   3  -4 -11 1401.49   25.18
   4  -3 -11 1354.41   31.16
   3  -4 -11 1432.14   25.96
   4  -3 -11 1381.43   26.72
  -1  -3  11 1343.24   24.17
   1  -4  11 1384.33   22.42
  -4   1 -11 1514.86   33.82
   3   1  14  343.72   19.89
  -1  -3  14  271.73   12.72
  -4   1 -14  281.64   14.74
   1   3 -14  308.98   17.27
  -1   4 -14  248.35   14.62
  -3  -1 -14  340.25   16.63
   4  -3 -14  270.71   12.60
   1   3 -14  295.13   12.79
   4  -3 -14  267.92   13.93
   3  -4 -14  281.05   11.68
  -1   4 -14  277.56    9.67
   3  -4 -14  284.00   12.40
   3  -4 -14  335.13    9.93
  -3  -1 -14  288.80   15.82
   1  -4  14  273.60    9.65
  -4   1 -14  379.55   19.72
  -1  -3  14  271.67   10.34
  -3  -1 -14  288.99   14.96
  -1  -3  17 1508.02   31.71
   3   1  17 1506.11   36.80
  -3  -1 -17 1816.95   42.74
  -1   4 -17 1471.93   38.87
   1   3 -17 1727.39   43.31
  -4   1 -17 1682.52   40.57
   3  -4 -17 1525.75   30.84
   1   3 -17 1551.43   29.93
   4  -3 -17 1495.08   33.68
  -1   4 -17 1454.17   23.87
   3  -4 -17 1535.89   27.56
   4  -3 -17 1497.36   30.93
  -1  -3  17 1455.11   22.63
   3  -4 -17 1690.11   21.87
   1  -4  17 1471.93   21.54
  -3  -1 -17 1352.19   32.19
  -4   1 -17 1819.67   41.44
  -3  -1 -17 1773.65   39.05
   3   1  20  569.93   21.42
  -3   4  20  638.95   12.75
  -1  -3  20  685.74   22.40
  -1   4 -20  671.44   28.32
  -4   1 -20  621.90   25.18
  -3  -1 -20  700.43   27.23
   1   3 -20  783.24   30.64
  -1   4 -20  643.42   16.97
   1   3 -20  672.86   20.34
   4  -3 -20  678.14   21.79
   3  -4 -20  659.53   18.34
   3  -4 -20  696.27   22.01
   4  -3 -20  699.21   23.75
  -3  -1 -20  876.32   28.46
  -1  -3  20  627.71   13.83
  -3  -1 -20  610.55   22.00
   3  -4 -20  746.44   15.46
  -4   1 -20  787.81   27.24
  -4   3  23  114.74    7.93
   3   1  23   98.33    8.93
  -1   4 -23  118.40   12.27
   1   3 -23  161.91   14.88
  -4   1 -23  117.72   11.57
  -3  -1 -23  109.32   11.04
   4  -3 -23  124.93   10.62
  -1   4 -23  113.34    7.69
   3  -4 -23  108.22    9.17
   1   3 -23  119.57    8.95
   4  -3 -23  119.30    9.66
  -4   1 -23  128.75   11.40
  -3  -1 -23  142.57   10.98
  -1  -3  23  102.17    5.03
  -3  -1 -23   94.76    8.84
  -4   3  26  156.08    9.27
   3   1  26  150.75   11.39
  -3  -1 -26  163.77   14.31
  -4   1 -26  164.79   13.92
   1   3 -26  199.66   17.37
  -1   4 -26  152.89   13.94
   3  -4 -26  169.81   12.09
   1   3 -26  156.38   10.81
  -1   4 -26  161.27    9.94
   4  -3 -26  159.77   11.44
  -4   1 -26  179.21   13.47
  -3  -1 -26  188.99   12.35
  -1  -3  26  143.29    5.36
  -3  -1 -26  147.30   10.96
   3   1  29 1998.45   42.99
  -4   3  29 2217.27   36.35
  -3  -1 -29 1998.41   50.82
   1   3 -29 2665.61   66.30
  -1   4 -29 2039.72   52.43
  -4   1 -29 2054.78   51.39
   3  -4 -29 2465.30   47.15
   4  -3 -29 2280.53   44.28
  -1   4 -29 2341.85   40.45
   1   3 -29 2266.77   42.50
  -3  -1 -29 2169.48   43.41
  -4   1 -29 2516.74   50.48
  -3  -1 -29 2678.26   44.16
  -4   1 -29 2005.67   32.48
  -4   3  32   49.69    5.25
   3   1  32   53.87    7.83
  -1   4 -32   50.96    8.36
  -4   1 -32   50.23    8.52
  -3  -1 -32   55.43    8.78
   1   3 -32   63.82   11.19
  -1   4 -32   49.90    6.36
   1   3 -32   49.07    6.56
   3  -4 -32   57.20    7.41
   4  -3 -32   55.05    7.46
  -3  -1 -32   56.55    7.76
  -3  -1 -32   63.42    6.99
  -4   1 -32   54.47    5.67
  -3  -1 -35    8.27    2.52
   3   1  35    6.01    2.74
  -4   1 -35    1.66    0.80
   1   3 -35    8.87    5.31
  -1   4 -35    6.40    1.98
  -3  -1 -35    3.99    2.21
  -1   4 -35    6.06    1.06
   3  -4 -35    7.73    1.46
   1   3 -35    8.35    2.78
   4  -3 -35    7.33    3.57
  -3  -1 -35    5.44    2.94
   3   1  38  943.76   32.76
  -4   1 -38  850.11   36.42
   1   3 -38 1132.32   49.18
  -1   4 -38  815.48   35.91
  -3  -1 -38  800.19   35.40
   3  -4 -38  929.76   31.75
  -3  -1 -38 1043.88   36.71
  -1   4 -38  946.43   29.76
   4  -3 -38  905.17   30.87
  -4   1 -38  976.62   33.27
   1   3 -38  943.31   31.11
  -3  -1 -38 1129.78   37.95
   3   1  41   15.69    4.01
  -1   4 -41   14.90    3.91
   1   3 -41   12.44    4.23
   3  -4 -41   14.43    3.92
   4  -3 -41   16.68    5.01
  -3  -1 -41   18.58    5.31
  -4   1 -41   15.32    3.46
  -4   1 -41   10.35    4.31
   1   3 -41    7.74    2.96
  -1   4 -41   12.22    4.50
  -3  -1 -41   11.06    5.14
   3   1  44  111.11   11.76
   1   3 -44  104.15   11.17
   3  -4 -44  105.50   11.21
  -3  -1 -44  111.45   12.07
  -1   4 -44  111.49   10.89
   4  -3 -44  100.93   10.96
  -4   1 -44  101.41   11.03
  -3  -1 -44   85.37   12.74
   1   3 -44  105.82   14.88
  -4   1 -44   94.05   12.82
  -1   4 -44   92.70   13.38
   3   1  47  668.77   30.56
   1   3 -47  622.14   37.01
  -1   4 -47  499.48   30.09
  -3  -1 -47  525.45   31.80
  -4   1 -47  548.80   32.00
   4  -3 -47  600.10   27.48
  -4   1 -47  622.56   28.41
   3  -4 -47  602.48   27.93
  -3  -1 -47  644.80   30.26
   1   3 -47  626.79   28.07
  -1   4 -47  632.61   27.00
   1   3 -50  204.07   21.01
  -3  -1 -50  164.05   18.00
  -1   4 -50  174.96   17.75
  -4   1 -50  182.54   18.96
   3  -4 -50  220.97   16.94
  -3  -1 -50  250.20   19.08
  -4   1 -50  238.92   17.55
   4  -3 -50  215.41   16.85
   1   3 -50  235.23   17.35
  -1   4 -50  240.08   16.98
  -4   1 -53   15.93    5.67
  -3  -1 -53   13.27    4.71
   1   3 -53   23.34    5.63
  -1   4 -53   15.40    5.08
  -1   4 -53   16.51    3.76
   3  -4 -53   14.08    4.43
  -4   1 -53   18.85    5.24
   1   3 -53   16.97    5.66
   4  -3 -53   19.14    4.90
  -3  -1 -53   17.83    4.02
  -4   1 -56   78.45   12.96
  -3  -1 -56   57.48   10.63
  -1   4 -56   61.03   10.86
   1   3 -56   62.95   11.37
  -4   1 -56   64.27    9.16
  -1   4 -56   65.29    9.44
   4  -3 -56   68.71    9.88
  -3  -1 -56   76.69   10.33
   1   3 -56   69.95    9.73
   3  -4 -56   75.24   10.43
  -3  -1 -59  155.02   18.88
   1   3 -59  132.78   17.42
  -1   4 -59  141.12   17.05
  -4   1 -59  163.45   19.44
  -3  -1 -59  203.34   18.23
   4  -3 -59  185.05   16.51
   1   3 -59  186.34   16.51
  -4   1 -59  198.82   17.14
   3  -4 -59  185.00   16.16
  -4   1 -62    8.57    5.53
  -1   4 -62    4.38    2.58
   1   3 -62    3.12    1.89
   1   3 -62    6.94    3.91
   3  -4 -62    5.90    4.05
   4  -3 -62    3.37    1.74
  -4   1 -62    3.65    2.40
  -3  -1 -62    4.73    2.31
  -4   1 -65  193.46   22.47
  -4   1 -65  201.10   18.42
  -3  -1 -65  199.59   18.69
   3  -4 -65  185.96   17.23
   4  -3 -65  181.16   16.67
  -4   1 -68   26.32    9.21
  -4   1 -68   21.84    4.61
  -4   4 -65   -4.64    5.85
   4   0 -65   -0.25    3.28
  -4   4 -62   39.02    9.79
   4   0 -62   39.68    7.97
   0  -4 -62   41.88    8.42
  -4   4 -59   -3.22    4.26
   0  -4 -59    1.54    1.21
   4   0 -59    0.58    2.33
  -4   4 -56   55.34   12.13
   0  -4 -56   65.86    9.18
   4   0 -56   65.24    9.91
  -4   4 -53    2.49    4.43
   0  -4 -53   -0.90    4.61
   4   0 -53    0.59    2.40
  -4   4 -50   87.05   13.65
   4   0 -50  106.42   14.72
   0  -4 -50  118.72   12.97
   4   0 -50  116.35   13.20
  -4   4 -50  105.70   10.60
  -4   4 -47    2.16    3.60
   4   0 -47   -2.92    2.72
   0  -4 -47   -0.72    3.13
  -4   4 -47    4.69    1.72
  -4   4 -44  330.47   25.66
   4   0 -44  379.62   30.10
  -4   4 -44  316.83   17.20
   0  -4 -44  356.69   20.96
   4   0 -44  333.14   20.50
  -4   4 -41    7.54    2.15
   4   0 -41   -2.48    7.05
   0  -4 -41    1.94    2.23
  -4   4 -41    5.23    3.16
   4   0 -41    3.11    2.86
   0  -4 -41    3.21    2.32
   0  -4 -38   33.13    4.62
  -4   0  38   25.41    6.09
   4   0 -38   17.25    5.67
  -4   4 -38   21.78    6.60
  -4   4 -38   29.94    4.78
   0  -4 -38   27.66    5.47
   4   0 -38   22.73    5.14
   0  -4 -38   35.24    6.30
   0  -4 -35    0.89    1.19
  -4   0  35    5.16    3.02
   4   0 -35    2.87    2.47
  -4   4 -35    1.38    3.03
   4   0 -35    5.53    2.66
  -4   4 -35    3.17    1.68
   0  -4 -35   -0.56    3.04
   0  -4 -35    1.33    1.68
  -4   0  32 1510.00   38.92
  -4   4 -32 1471.04   48.87
   4   0 -32 1595.66   53.41
  -4   4 -32 1435.53   31.89
   0  -4 -32 1450.92   37.68
   4   0 -32 1448.44   38.21
   0  -4 -32 1484.24   31.56
   0  -4 -32 1319.55   31.13
  -4   0  29    0.89    1.36
   0  -4 -29    1.22    0.71
   4   0 -29    1.58    1.89
  -4   4 -29    1.60    2.69
  -4   4 -29    2.63    0.80
   0  -4 -29    0.60    0.95
   4   0 -29    2.09    1.45
   0  -4 -29    2.74    1.07
  -4   0  26   78.04    8.37
   4   0 -26   79.42   11.35
  -4   4 -26   77.90   10.43
   0  -4 -26   76.71    8.02
  -4   4 -26   71.45    6.38
   4   0 -26   75.42    8.31
   0  -4 -26   80.50    7.20
   0  -4 -26   77.60    7.64
   0  -4 -23    0.34    0.57
  -4   0  23    0.79    2.10
   4   0 -23    3.19    3.42
  -4   4 -23    2.25    1.85
  -4   4 -23    0.31    0.55
   4   0 -23    8.46    2.63
   0  -4 -23    7.21    1.36
   4   0 -20 2017.16   51.45
  -4   4 -20 2041.89   50.29
   4   0 -20 2049.35   46.84
   4   0 -20 2174.37   42.54
   0  -4 -20 2121.78   37.59
   0  -4 -17    1.94    1.29
   4   0 -17    0.50    3.86
  -4   4 -17    4.15    1.50
   4   0 -17    4.38    0.81
   4   0 -17    4.23    0.90
  -4   4 -14  368.42   18.66
   4   0 -14  357.68   17.97
   4   0 -14  394.51   17.05
  -4   0  14  368.26   13.45
   0  -4 -14  365.38   15.38
  -4   4 -11    1.55    1.21
  -4   4 -11    2.68    2.49
   0  -4 -11    1.84    0.89
   4   0 -11    3.73    2.34
  -4   0  11    4.04    1.76
  -4   4  -8 1414.73   31.25
   0   4   8 1418.96   26.61
  -4   0   8 1407.54   26.70
   0  -4  -8 1452.64   29.81
  -4   4  -5    4.52    1.96
   0   4   5    1.75    0.94
   0  -4  -5    1.75    0.60
   0  -4  -5    2.44    2.08
   4   0  -5    6.16    2.31
  -4   4  -2  920.71   23.25
   0  -4  -2  994.69   16.95
   0   4   2  945.44   20.19
   4   0  -2  961.09   28.94
   0  -4  -2  952.06   22.82
   0  -4   1    2.58    1.34
   0  -4   1    2.40    1.33
  -4   0  -1    2.17    0.66
   0   4  -1    2.49    1.06
  -4   4   1    2.21    1.49
   4  -4  -1    4.45    1.95
   0  -4   1    1.78    1.46
   4   0   1    2.08    1.31
   0  -4   4  964.06   19.77
  -4   4   4  997.34   25.23
   0   4  -4  972.38   22.30
   0   4  -4  978.31   21.74
   4  -4  -4  962.50   18.18
   0  -4   4  993.26   22.85
   0  -4   7    3.06    1.25
   4   0   7    0.85    1.06
   0  -4   7    2.93    1.19
   0   4  -7    3.31    1.58
  -4   0  -7    4.79    0.93
  -4   4   7    2.66    1.50
   4  -4  -7    5.81    1.60
   0  -4  10   64.57    6.01
   0   4 -10   64.02    6.90
  -4   0 -10   72.90    6.26
   4  -4 -10   67.72    5.72
   4  -4 -10   70.13    6.69
  -4   0 -10   60.10    6.96
   0  -4  10   71.53    5.60
   4   0  13    0.59    0.65
   0  -4  13    1.84    1.41
   0  -4  13    1.10    0.80
   0   4 -13    4.83    2.14
  -4   0 -13    1.28    0.81
   4  -4 -13    1.11    1.00
   4  -4 -13    4.23    1.83
  -4   0 -13    3.29    1.69
   4   0  16 2158.50   40.83
   0   4 -16 2653.24   51.63
  -4   0 -16 2401.04   40.87
   0   4 -16 2571.06   35.62
   4  -4 -16 2515.28   39.20
   4  -4 -16 2607.59   41.78
   0  -4  16 2520.17   30.54
  -4   0 -16 2308.90   42.68
   0  -4  19    2.21    1.09
   4   0  19    2.36    2.16
   0   4 -19    5.34    2.39
  -4   0 -19    5.12    2.10
   4  -4 -19    4.43    1.87
   0   4 -19    3.30    1.89
  -4   0 -19    4.09    2.17
   4  -4 -19    4.95    2.49
  -4   4  22   33.67    3.76
   4   0  22   33.61    5.79
   0   4 -22   33.05    5.91
  -4   0 -22   33.23    5.37
   4  -4 -22   34.54    5.17
   4  -4 -22   34.70    5.27
   0   4 -22   36.40    4.67
   0  -4  22   31.91    3.19
  -4   0 -22   36.39    5.47
   0  -4  25    2.38    0.77
  -4   0 -25    2.29    1.47
  -4   4  25    0.39    1.22
   4   0  25    3.97    2.43
  -4   0 -25    3.05    0.60
   0   4 -25    2.42    2.72
   4  -4 -25    0.64    1.27
   4  -4 -25    1.04    1.56
   0   4 -25    3.25    1.34
  -4   0 -25    2.68    1.47
   4   0  28  557.76   23.93
  -4   4  28  579.49   16.40
   0   4 -28  553.65   27.98
   4  -4 -28  598.84   22.51
   0   4 -28  607.99   20.63
  -4   0 -28  587.11   20.06
  -4   0 -28  647.34   24.98
   4   0  31    1.24    1.48
  -4   0 -31    1.59    0.94
   0   4 -31    1.24    0.53
  -4   0 -31    0.07    0.38
   4  -4 -31    1.93    1.75
   0   4 -31    1.72    1.74
  -4   0 -31    0.25    1.51
   4   0  34  211.66   15.52
   0   4 -34  210.05   17.74
  -4   0 -34  175.02   15.39
   0   4 -34  204.96   13.26
   4  -4 -34  197.44   13.76
  -4   0 -34  237.67   17.30
  -4   0 -34  219.76   12.65
   4   0  37    4.47    1.35
  -4   0 -37    7.01    4.48
   0   4 -37   -0.44    2.36
   4  -4 -37    2.56    1.63
   0   4 -37    2.99    0.83
  -4   0 -37    6.20    4.27
   4   0  40  506.57   25.33
   4  -4 -40  470.94   22.83
   0   4 -40  523.73   23.54
  -4   0 -40  592.13   28.63
  -4   0 -40  419.34   25.56
   0   4 -40  441.07   27.07
   4   0  43    0.64    0.70
  -4   0 -43    3.74    3.51
   4  -4 -43    2.93    1.95
   0   4 -43    2.98    1.84
   0   4 -43   -2.06    2.47
  -4   0 -43    2.28    1.56
   4   0  46  152.21   14.15
   0   4 -46  190.27   15.10
  -4   0 -46  193.89   16.63
   4  -4 -46  166.83   14.42
   0   4 -46  119.24   15.15
  -4   0 -46  123.72   14.83
   4   0  49    2.34    2.48
  -4   0 -49   -0.52    3.29
   0   4 -49   -0.24    2.15
   4  -4 -49    1.49    1.26
   0   4 -49   -1.15    2.20
  -4   0 -49    1.70    3.32
  -4   0 -52  309.04   24.98
   0   4 -52  290.53   23.50
  -4   0 -52  390.93   24.43
   0   4 -52  353.59   21.60
   4  -4 -52  331.60   21.14
   0   4 -55    1.65    2.12
  -4   0 -55    3.44    4.23
   4  -4 -55    1.28    2.07
  -4   0 -55    4.98    2.88
   0   4 -55    3.25    1.23
   0   4 -58   23.53    5.89
  -4   0 -58   27.40    8.49
   4  -4 -58   35.48    6.79
  -4   0 -58   50.20    8.81
  -4   0 -61    1.54    2.89
   0   4 -61    4.29    4.24
   4  -4 -61   -2.58    2.66
  -4   0 -61    2.42    4.00
  -4   0 -64  176.31   21.06
   0   4 -64  198.41   20.80
  -4   0 -64  254.95   20.96
   4  -4 -64  224.66   19.10
  -4   0 -67   -7.73    8.25
  -4   0 -67    1.98    1.88
  -5   3 -65   33.69    9.88
   3   2 -65   42.99    8.45
  -5   3 -62    7.01    4.51
   3   2 -62    5.40    4.48
  -3   5 -62   10.44    3.49
  -2  -3 -62   11.45    5.03
   5  -2 -62    2.74    1.30
   2  -5 -62    7.67    1.75
   3   2 -62    5.84    1.47
   3   2 -59    9.88    6.68
  -5   3 -59   -0.98    5.45
  -3   5 -59    5.51    2.51
  -2  -3 -59    9.02    4.66
   5  -2 -59    8.30    3.19
   2  -5 -59    5.64    1.86
   3   2 -59    8.22    1.58
  -3   5 -56    8.28    3.65
  -5   3 -56    4.91    3.14
   5  -2 -56   10.75    3.93
  -2  -3 -56    6.89    1.06
   3   2 -56    9.33    2.41
   2  -5 -56    7.61    0.84
  -5   3 -56   10.06    2.98
   3   2 -53  466.30   35.00
  -5   3 -53  372.56   28.79
  -3   5 -53  364.60   27.96
  -5   3 -53  369.99   21.20
   3   2 -53  412.86   24.42
   5  -2 -53  401.77   23.78
  -2  -3 -53  429.17   26.68
   2  -5 -53  383.55   23.82
  -3   5 -50    6.05    2.69
  -5   3 -50   11.72    5.30
   3   2 -50    6.96    4.50
   2  -5 -50    9.08    2.15
   3   2 -50   10.81    3.91
  -5   3 -50   13.63    3.13
   5  -2 -50   17.42    4.58
  -2  -3 -50   10.72    4.06
  -3   5 -47  231.37   21.48
  -5   3 -47  221.05   21.66
   3   2 -47  293.68   25.77
  -5   3 -47  215.24   15.33
   2  -5 -47  219.43   17.05
   5  -2 -47  221.08   16.94
   3   2 -47  242.23   17.91
  -2  -3 -47  241.31   19.23
  -5   3 -44  179.00   19.11
   3   2 -44  206.63   21.26
  -3   5 -44  179.56   18.84
   5  -2 -44  198.55   15.70
  -2  -3 -44  217.02   17.57
   3   2 -44  193.54   15.58
  -3   5 -44  184.57   13.32
  -5   3 -44  188.07   13.84
   2  -5 -44  197.31   15.68
  -2  -3 -44  165.17   12.37
   2   3  41  133.59   12.14
  -3   5 -41  131.35   15.11
  -5   3 -41  144.50   17.05
   3   2 -41  167.27   18.35
   3   2 -41  130.99   12.43
  -5   3 -41  119.94   10.95
  -2  -3 -41  134.87   13.71
   2  -5 -41  134.98   12.79
   5  -2 -41  129.08   12.52
  -3   5 -41  125.14   10.87
  -2  -3 -41  105.78    9.43
   2   3  38  495.05   22.36
  -5   2  38  586.07   23.37
   3   2 -38  630.92   33.63
  -3   5 -38  561.31   31.57
  -5   3 -38  572.74   32.63
  -3   5 -38  590.10   22.54
   2  -5 -38  575.86   24.95
  -5   3 -38  561.06   23.22
  -2  -3 -38  640.75   28.74
   5  -2 -38  555.62   24.91
   3   2 -38  609.38   26.29
  -2  -3 -38  636.67   21.92
  -2  -3 -38  460.50   19.25
  -5   2  35  500.13   21.29
   2   3  35  411.78   20.13
   2  -5 -35  543.22   19.92
  -3  -2  35  532.69   24.86
  -5   3 -35  501.00   29.49
  -3   5 -35  458.00   27.93
   3   2 -35  502.36   28.96
   5  -2 -35  498.84   22.73
  -5   3 -35  493.21   21.39
   3   2 -35  527.33   23.83
   2  -5 -35  512.07   22.73
  -3   5 -35  524.60   20.32
  -2  -3 -35  384.20   17.13
  -2  -3 -35  535.49   19.99
   2  -5 -35  590.33   21.10
   2  -5 -32  491.42   18.80
  -3  -2  32  527.45   24.03
   2   3  32  448.27   21.35
  -5   2  32  489.14   20.68
  -5   3 -32  502.18   29.13
   3   2 -32  516.03   28.54
  -3   5 -32  492.20   28.47
  -3   5 -32  497.29   18.88
   3   2 -32  495.25   22.31
   5  -2 -32  458.04   21.31
   2  -5 -32  474.42   21.17
  -2  -3 -32  484.10   19.13
   2  -5 -32  584.95   21.12
  -2  -3 -32  415.92   18.34
  -5   2  29  732.05   24.75
  -3  -2  29  739.55   27.71
  -5   3 -29  750.23   34.67
  -3   5 -29  778.39   35.68
   3   2 -29  761.89   32.16
   2  -5 -29  709.17   24.97
  -3   5 -29  719.91   21.44
   3   2 -29  742.08   26.26
   5  -2 -29  699.54   25.71
  -2  -3 -29  729.81   23.54
   2  -5 -29  728.63   22.57
  -2  -3 -29  658.80   23.85
  -3  -2  26  168.24   12.55
  -5   2  26  169.20   11.99
   3   2 -26  167.59   14.56
  -3   5 -26  170.93   16.26
  -5   3 -26  171.66   16.42
   5  -2 -26  159.69   14.14
   2  -5 -26  157.40   11.35
   5  -2 -26  160.58   12.04
  -3   5 -26  169.82    9.70
   3   2 -26  178.20   12.48
  -2  -3 -26  160.25   11.95
   2  -5 -26  177.53   10.75
   2  -5 -26  161.91   10.49
  -2  -3 -26  156.22   10.97
  -3  -2  23 2045.20   42.91
  -5   3 -23 2125.11   53.70
  -3   5 -23 2043.15   52.77
   3   2 -23 2056.97   47.76
   3   2 -23 2008.01   41.26
   5  -2 -23 1994.22   46.94
  -3   5 -23 1951.35   30.01
   2  -5 -23 1944.89   38.36
   5  -2 -23 1993.88   41.36
   2  -5 -23 2022.38   33.79
  -2  -3 -23 1946.37   42.65
  -2  -3 -23 1890.44   37.89
   2  -5 -23 1954.45   36.34
  -3  -2  20  168.38   12.00
   3   2 -20  163.14   12.65
  -3   5 -20  163.28   14.29
  -5   3 -20  166.32   14.47
   2  -5 -20  158.93   10.50
   3   2 -20  167.72   11.59
  -3   5 -20  163.35    7.66
   5  -2 -20  150.47   12.54
   5  -2 -20  173.46   12.12
  -2  -3 -20  162.28   11.15
  -2  -3 -20  171.49   12.84
   2  -5 -20  167.34   10.59
  -3  -2  17   24.08    4.65
  -2  -3 -17   19.24    3.67
   2  -5 -17   22.59    3.91
  -3   5 -17   29.40    6.92
   3   2 -17   19.32    4.23
  -5   3 -17   18.77    5.82
   3   2 -17   20.24    4.76
  -3   5 -17   25.60    2.75
   2  -5 -17   21.19    3.80
   5  -2 -17   22.93    4.46
   5  -2 -17   17.06    4.59
  -5   2  17   25.05    3.30
  -3   5 -14   94.00    9.87
  -5   3 -14  101.01    9.79
   3   2 -14  105.81    8.87
   3   2 -14   97.04    9.42
   2  -5 -14   91.87    6.99
   5  -2 -14   93.77    9.49
  -3   5 -14   91.52    3.93
   2   3  14  103.60    6.94
   5  -2 -14   98.59    8.45
  -2  -3 -14   94.80    8.43
   2  -5 -14   89.65    7.68
  -5   2  14   96.85    5.69
  -2   5  11  511.33   19.92
  -3   5 -11  482.10   20.58
  -5   3 -11  516.10   19.86
   3   2 -11  514.32   17.92
  -3   5 -11  497.80   20.46
   5  -2 -11  489.85   21.43
   2   3  11  572.49   16.68
   2  -5 -11  519.25   15.74
   5  -2 -11  480.51   17.85
   3   2 -11  519.05   20.66
   2  -5 -11  535.89   10.50
  -2  -3 -11  485.57   19.13
  -5   3 -11  497.16   17.82
  -3  -2  11  497.73   17.47
   2  -5 -11  521.78   18.10
  -2  -3  -8    9.19    2.47
   2  -5  -8   12.72    2.60
   3   2  -8    8.59    2.41
  -2   5   8    7.91    2.49
   2   3   8    8.35    1.44
  -3   5  -8    7.40    2.74
  -5   3  -8    8.06    2.10
   2  -5  -8   10.25    2.12
   3   2  -8    8.31    2.70
   2   3   8    9.65    2.24
  -3  -2   8   11.89    2.53
  -5   3  -8   10.18    2.48
   5  -2  -8   11.22    3.24
   2   3   5 2768.78   25.54
  -5   3  -5 2769.73   38.60
  -3   5  -5 2679.55   43.89
  -2   5   5 2736.17   41.52
   3   2  -5 2815.80   32.41
   2   3   5 2721.73   35.47
   5  -2  -5 2889.89   52.93
   3   2  -5 2644.94   42.79
  -5   3  -5 2758.79   37.85
   2  -5  -5 2643.17   39.36
   2  -5  -5 2630.29   33.76
  -2  -3  -5 2544.18   43.22
  -3  -2   5 2682.59   41.41
  -5   3  -2  457.61   15.43
  -2   5   2  480.44   17.22
   2   3   2  463.43   10.65
  -5   2   2  438.65   14.70
  -3   5  -2  484.24   17.84
   2   3   2  450.62    9.55
   3   2  -2  503.57   10.93
   3   2  -2  470.26   17.77
   5  -2  -2  491.25   21.35
   3  -5   2  485.03    7.76
   2   3   2  476.08   15.00
  -2  -3  -2  448.59   17.82
  -5   3  -2  500.76   14.82
   2  -5  -2  462.10   16.23
   2  -5  -2  445.70   14.15
  -5   3   1  522.86   16.57
  -5   2  -1  523.36   14.49
  -2   5  -1  564.20   18.80
  -3   5   1  551.16   18.89
   2   3  -1  588.40   13.54
   3  -5  -1  556.21   10.91
   2   3  -1  549.77   16.83
   3   2   1  584.47   20.03
   2  -5   1  527.28   16.88
  -5   2  -1  493.61   16.35
  -2  -3   1  515.18   19.05
  -2  -3   1  537.87   18.73
  -5   3   1  551.74   14.07
  -3   5   4  703.20   21.74
  -5   2  -4  722.52   17.49
   5  -2   4  668.94   21.51
  -5   3   4  711.72   20.98
  -2   5  -4  702.85   21.64
   2   3  -4  628.84   15.09
   3   2   4  740.58   23.06
   2   3  -4  698.98   20.35
   5  -3  -4  779.94   26.52
   3  -5  -4  687.30   14.09
  -2  -3   4  663.88   21.30
   3  -5  -4  693.85   15.63
  -2  -3   4  649.81   20.12
  -5   2  -4  681.44   20.85
   2  -5   4  634.07   18.15
  -5   3   4  759.26   15.11
  -3   5   7   63.03    6.92
   5  -3  -7   81.79    7.27
  -5   2  -7   54.20    5.32
   3  -5  -7   57.06    5.81
   5  -2   7   60.90    6.83
  -2   5  -7   55.73    6.45
   2   3  -7   54.78    5.34
   5  -3  -7   55.56    5.30
   2   3  -7   55.21    6.26
   3   2   7   57.29    6.32
   5  -3  -7   57.85    7.47
   3  -5  -7   55.53    4.64
   2  -5   7   53.50    5.34
  -3  -2  -7   63.10    7.66
  -2  -3   7   51.32    5.77
  -2  -3   7   52.41    5.85
  -5   2  -7   72.01    7.86
   3  -5  -7   56.73    4.20
  -5   3   7   64.37    3.96
  -3   5  10 1981.14   40.14
   3  -5 -10 1916.58   33.92
  -2  -3  10 1891.87   34.55
  -5   2 -10 1989.26   35.93
   2   3 -10 1943.30   35.01
  -2   5 -10 1918.45   39.24
   5  -3 -10 1946.22   42.09
   3  -5 -10 1942.48   29.16
   5  -3 -10 1895.56   33.42
   3   2  10 1939.72   35.55
   2  -5  10 1932.67   30.57
  -2  -3  10 1841.06   33.81
  -2  -3  13 2463.80   40.51
   2  -5  13 2441.70   34.12
   3  -5 -13 2505.17   39.34
  -2   5 -13 2506.55   47.88
   2   3 -13 2621.96   44.43
  -5   2 -13 2591.68   45.97
   5  -3 -13 2528.64   47.77
   3  -5 -13 2590.53   32.73
   5  -3 -13 2546.34   41.05
   3  -5 -13 2465.99   35.56
  -5   2 -13 2820.88   48.67
  -2  -3  13 2371.96   37.48
  -3  -2 -13 2947.73   54.82
  -2  -3  16  660.08   21.88
   3  -5 -16  666.80   20.69
  -2   5 -16  671.90   26.20
  -5   2 -16  719.15   26.34
   2   3 -16  709.21   25.05
  -2   5 -16  645.58   13.73
   5  -3 -16  680.58   21.99
   3  -5 -16  695.02   16.78
   3  -5 -16  673.25   19.89
   5  -3 -16  672.21   24.46
  -5   2 -16  735.99   25.32
  -5   3  16  754.21   12.04
  -2  -3  16  637.55   18.81
  -3  -2 -16  791.31   28.02
  -2  -3  19 1042.74   28.78
  -3  -2 -19 1180.71   37.00
  -5   2 -19 1130.83   35.80
  -2   5 -19 1072.82   35.34
   2   3 -19 1156.96   34.16
   3  -5 -19 1013.00   19.97
   5  -3 -19 1057.09   28.24
   5  -3 -19 1068.64   32.00
   2   3 -19 1134.06   29.20
  -2   5 -19 1011.72   18.91
   3  -5 -19 1028.47   26.17
  -5   2 -19 1148.95   32.57
  -3  -2 -19 1160.62   35.40
  -3  -2 -19 1237.99   34.54
   3  -5 -19 1164.59   22.08
  -2  -3  19 1024.40   22.87
  -3  -2 -22   31.48    5.23
   3   2  22   25.12    5.29
  -2  -3  22   27.89    5.08
  -5   2 -22   28.87    4.92
  -2   5 -22   25.69    5.67
   2   3 -22   25.84    6.24
  -3  -2 -22   27.88    6.45
   5  -3 -22   30.53    4.98
   3  -5 -22   27.23    4.79
   5  -3 -22   26.05    4.96
   2   3 -22   28.66    4.60
  -2   5 -22   28.05    3.42
  -3  -2 -22   26.70    4.74
   3  -5 -22   38.12    4.99
  -5   2 -22   34.77    5.94
  -2  -3  22   26.40    3.64
   3   2  25  945.18   30.82
  -2  -3  25 1110.36   31.93
   2   3 -25 1124.73   37.78
  -2   5 -25 1095.89   39.33
  -5   2 -25 1090.52   38.38
  -3  -2 -25 1284.34   47.45
   5  -3 -25 1093.36   34.28
   5  -3 -25 1046.84   29.73
   2   3 -25 1031.14   28.92
   3  -5 -25 1031.08   28.81
  -2   5 -25  973.32   22.21
  -2  -3  25  971.57   20.00
  -3  -2 -25  972.60   29.76
  -5   2 -25 1084.98   32.38
   3  -5 -25 1174.94   23.71
  -3  -2 -25 1175.96   32.57
  -2  -3  28  108.33   10.22
   3   2  28  103.04    9.85
  -5   3  28  117.93    9.22
  -2   5 -28  125.81   13.83
  -3  -2 -28  125.70   14.74
   2   3 -28  119.80   13.17
  -5   2 -28  124.09   13.11
   3  -5 -28  116.34    9.97
  -2   5 -28  112.67    8.24
   2   3 -28  113.48    9.84
   5  -3 -28  109.58   10.05
   5  -3 -28  105.59   11.54
   3  -5 -28  127.35    8.04
  -3  -2 -28  104.85    9.57
  -2  -3  28  100.48    5.83
  -3  -2 -28  131.60   10.77
  -5   3  31  101.07    8.58
   3   2  31   86.66    9.17
  -5   2 -31  103.70   12.33
   2   3 -31  125.12   14.10
  -2   5 -31  102.19   12.03
  -3  -2 -31   94.48   13.14
   2   3 -31  103.82    9.45
   3  -5 -31   96.09    9.58
   5  -3 -31  105.68   10.05
  -2   5 -31  105.51    8.57
  -3  -2 -31   89.08    8.49
  -3  -2 -31  118.26   10.11
   3   2  34   40.36    6.46
  -5   3  34   40.58    5.38
  -2   5 -34   36.24    7.21
  -3  -2 -34   38.46    7.76
  -5   2 -34   48.56    9.20
   2   3 -34   35.16    7.99
   2   3 -34   37.24    5.96
  -2   5 -34   36.28    5.29
   3  -5 -34   41.37    6.40
   5  -3 -34   43.72    6.28
  -3  -2 -34   42.87    5.96
  -3  -2 -34   28.66    5.13
   3   2  37  375.78   20.11
  -5   3  37  393.69   17.47
  -2   5 -37  404.91   25.53
  -5   2 -37  409.72   26.26
   2   3 -37  472.84   29.14
  -3  -2 -37  358.44   24.73
   3  -5 -37  399.63   20.61
  -2   5 -37  424.16   19.19
   5  -3 -37  409.64   21.01
   2   3 -37  419.84   20.96
  -3  -2 -37  305.55   16.12
  -3  -2 -37  471.22   19.38
   3   2  40    7.30    2.39
  -5   2 -40    4.91    1.54
   2   3 -40    9.03    5.26
  -2   5 -40    6.27    2.41
  -3  -2 -40    4.70    1.69
  -3  -2 -40    8.44    2.42
  -2   5 -40    7.35    2.99
  -5   2 -40   10.09    3.90
   2   3 -40    9.39    3.59
   3  -5 -40   12.32    2.59
   5  -3 -40    6.52    2.87
  -3  -2 -40    5.65    1.12
   3   2  43  827.89   31.96
  -2   5 -43  738.94   35.92
  -5   2 -43  791.52   38.03
  -3  -2 -43  642.75   34.41
   2   3 -43  949.26   44.54
   2   3 -43  867.00   32.69
   5  -3 -43  794.95   30.98
  -2   5 -43  857.11   29.60
  -5   2 -43  846.49   31.97
  -3  -2 -43  958.01   38.67
   3  -5 -43  821.36   31.61
  -3  -2 -43  666.53   24.40
  -2   5 -46  305.04   23.19
   2   3 -46  399.36   30.06
  -5   2 -46  316.48   24.45
  -3  -2 -46  259.74   22.22
   3  -5 -46  325.90   20.59
  -3  -2 -46  378.61   24.61
   2   3 -46  352.61   21.28
  -2   5 -46  345.46   19.48
  -5   2 -46  334.54   20.53
   5  -3 -46  326.16   20.33
  -2   5 -49   20.92    4.89
   2   3 -49   31.13    8.92
  -3  -2 -49    3.54    7.56
  -5   2 -49   18.75    7.47
   2   3 -49   21.41    5.12
  -5   2 -49   24.76    4.44
   5  -3 -49   25.36    5.64
   3  -5 -49   26.06    5.70
  -3  -2 -49   22.86    5.73
  -5   2 -52  183.55   19.78
  -2   5 -52  167.54   18.17
   2   3 -52  218.57   23.57
  -3  -2 -52  131.94   14.57
   2   3 -52  195.19   16.29
   3  -5 -52  189.31   16.26
  -3  -2 -52  217.76   18.99
  -5   2 -52  188.24   15.64
   5  -3 -52  192.24   16.41
  -5   2 -55   24.93    7.68
  -2   5 -55   16.80    6.28
   2   3 -55   19.58    6.48
  -5   2 -55   25.48    6.40
   3  -5 -55   21.24    5.63
   2   3 -55   17.40    4.07
   5  -3 -55   19.87    6.40
  -3  -2 -55   22.76    5.60
   2   3 -58  164.99   20.38
  -2   5 -58  174.81   19.46
  -5   2 -58  146.58   18.47
   3  -5 -58  176.84   16.45
  -5   2 -58  170.73   15.62
   5  -3 -58  180.70   16.62
  -3  -2 -58  199.24   17.92
   2   3 -58  187.81   16.84
  -2   5 -61  350.65   27.33
   2   3 -61  347.82   29.08
  -5   2 -61  351.06   28.81
   2   3 -61  390.77   24.34
   5  -3 -61  367.63   23.61
  -3  -2 -61  414.28   27.98
   3  -5 -61  360.40   23.30
  -5   2 -61  378.02   23.80
  -2   5 -64   20.31    6.48
  -5   2 -64   33.01    8.67
   2   3 -64   32.87    9.30
   5  -3 -64   26.69    6.20
   3  -5 -64   33.09    7.18
   2   3 -64   41.66    8.21
  -5   2 -64   33.90    7.42
  -3  -2 -64   48.00   10.39
  -5   2 -67   92.29   16.05
   4   1 -66   27.42    6.03
  -4   5 -63  155.65   20.28
  -5   4 -63  142.13   18.27
   5  -1 -63  145.71   15.25
  -1  -4 -63  161.93   17.24
   4   1 -63  142.66   14.67
   1  -5 -63  149.36   15.75
  -4   5 -60    5.96    1.62
  -5   4 -60    5.61    3.86
   5  -1 -60    7.18    3.05
   4   1 -60    7.03    1.41
   1  -5 -60    9.61    4.74
  -1  -4 -60   11.46    4.85
  -4   5 -57    8.36    3.29
   4   1 -57   -2.21    8.68
  -5   4 -57   -1.07    2.78
   5  -1 -57    7.16    1.37
   4   1 -57    8.99    2.75
   1  -5 -57   11.67    0.92
  -1  -4 -57   15.29    5.13
  -4   5 -54  160.86   18.65
  -5   4 -54  147.55   18.53
   4   1 -54  142.32   18.72
   1  -5 -54  164.29   15.35
   5  -1 -54  165.94   15.38
  -1  -4 -54  184.35   16.83
   4   1 -54  175.47   16.07
  -5   4 -51  228.69   22.91
  -4   5 -51  212.79   20.93
   4   1 -51  243.69   24.38
   4   1 -51  222.63   18.12
   1  -5 -51  223.47   17.63
  -1  -4 -51  223.95   18.35
  -5   4 -51  192.51   14.32
   5  -1 -51  211.68   16.86
  -5   4 -48   17.17    1.59
  -4   5 -48   30.21    7.78
   4   1 -48   40.17    9.30
   5  -1 -48   26.33    5.12
  -1  -4 -48   25.12    6.11
   4   1 -48   25.05    4.37
   1  -5 -48   27.54    5.48
  -5   4 -48   29.57    5.83
  -4   5 -45  138.00   16.92
   4   1 -45  162.76   19.23
  -5   4 -45  147.16   17.24
   4   1 -45  173.97   15.23
  -1  -4 -45  175.63   15.56
  -5   4 -45  152.05   12.01
   1  -5 -45  158.33   14.27
   5  -1 -45  159.31   14.14
  -4   5 -45  157.44   12.33
  -1  -4 -45  138.33   11.13
  -5   1  42  157.85   13.31
  -4   5 -42  156.72   17.56
   4   1 -42  176.72   18.84
  -5   4 -42  154.10   18.04
  -4   5 -42  159.38   12.15
  -5   4 -42  148.65   11.66
   1  -5 -42  153.27   13.34
   4   1 -42  153.77   13.85
  -1  -4 -42  169.08   14.67
   5  -1 -42  158.65   13.94
  -1  -4 -42  140.70   10.96
   1  -5 -42  198.05   14.41
  -1  -4 -39    2.69    0.98
  -5   1  39    5.16    1.96
   1  -5 -39    3.48    1.00
  -4  -1  39    0.85    3.20
  -4   5 -39    3.89    0.81
   4   1 -39    7.73    6.42
  -5   4 -39    2.10    3.60
   5  -1 -39    3.67    2.41
  -5   4 -39    2.16    1.58
  -4   5 -39    0.98    0.49
  -1  -4 -39    2.47    2.17
   1  -5 -39   -0.32    2.33
   4   1 -39    3.57    2.47
  -1  -4 -39    3.79    1.66
   1  -5 -39    2.79    0.19
   1  -5 -36   21.06    4.19
  -5   1  36   16.92    3.79
  -1  -4 -36   21.16    4.09
  -4  -1  36   14.91    2.71
  -4   5 -36   12.14    5.55
  -5   4 -36   11.27    2.83
   4   1 -36   13.98    6.75
  -1  -4 -36   19.10    5.03
   5  -1 -36   15.23    4.08
  -4   5 -36   22.13    4.17
   1  -5 -36   20.71    4.10
  -5   4 -36   18.00    4.14
   4   1 -36   19.46    4.70
   1  -5 -36   20.10    3.65
  -1  -4 -36   15.81    3.68
  -5   1  33  673.28   26.05
  -4  -1  33  695.07   28.18
  -4   5 -33  711.83   34.95
   4   1 -33  745.19   35.36
  -5   4 -33  712.90   35.41
  -4   5 -33  652.53   21.88
   1  -5 -33  636.78   25.20
  -5   4 -33  610.19   21.43
   4   1 -33  683.47   27.28
   5  -1 -33  644.92   26.04
   1  -5 -33  683.44   22.78
   1  -5 -33  653.70   21.80
  -1  -4 -33  573.51   21.33
  -1  -4 -33  696.10   22.91
  -5   1  30   74.00    8.89
  -4  -1  30   80.55    9.05
   4   1 -30   86.72   11.81
  -5   4 -30   83.93   11.90
  -4   5 -30   73.17   11.17
   5  -1 -30   71.19    8.40
   4   1 -30   77.75    8.70
  -4   5 -30   70.21    6.77
   1  -5 -30   73.53    8.13
  -5   4 -30   68.08    6.73
  -1  -4 -30   71.15    7.79
   1  -5 -30   73.92    7.36
   1  -5 -30   69.40    7.07
  -1  -4 -30   69.82    7.43
  -5   1  27   97.04    9.67
  -4  -1  27  106.37   10.19
  -4   5 -27   82.20   11.86
  -5   4 -27   80.72   11.60
   4   1 -27   75.15   10.29
   1  -5 -27   89.90    8.97
   5  -1 -27   95.77    9.61
   4   1 -27  100.35   10.29
   5  -1 -27   95.17   11.49
  -4   5 -27  107.65    8.08
   1  -5 -27  104.48    8.61
   1  -5 -27   90.46    7.96
  -1  -4 -27   99.47    8.73
  -1  -4 -27   90.85    9.10
  -4  -1  24  119.48   10.81
   4   1 -24   84.49   10.87
  -5   4 -24  107.61   12.85
  -4   5 -24  106.52   12.93
   1  -5 -24  120.43    9.71
   5  -1 -24  105.38   11.53
   4   1 -24  114.35   10.57
  -4   5 -24  141.06    8.56
   5  -1 -24  125.00   10.97
   1  -5 -24  133.44    9.85
  -1  -4 -24  116.92    9.58
  -1  -4 -24  129.16   11.10
   1  -5 -24  121.42    9.33
  -4  -1  21   60.99    7.38
   4   1 -21   68.06    9.03
  -5   4 -21   70.87    9.32
  -4   5 -21   66.49    9.54
   5  -1 -21   62.11    8.29
   4   1 -21   66.89    8.99
   5  -1 -21   74.10    8.24
   1  -5 -21   64.56    6.72
   4   1 -21   66.48    7.81
  -4   5 -21   63.44    5.19
  -1  -4 -21   63.53    6.91
   1  -5 -21   61.90    6.61
  -5   4 -18  202.75   15.48
  -4   5 -18  189.08   15.31
   4   1 -18  217.26   15.14
   4   1 -18  217.40   13.88
   5  -1 -18  193.79   12.75
   5  -1 -18  184.00   13.91
   1   4  18  212.69    7.76
  -4   5 -18  194.29    8.18
   4   1 -18  205.91   14.77
   1  -5 -18  184.72   11.31
  -5   1  18  196.96    9.73
  -1  -4 -18  186.55   11.71
  -4   5 -15 1224.58   35.94
   4   1 -15 1311.98   34.78
  -5   4 -15 1265.71   35.53
   4   1 -15 1241.13   34.45
   5  -1 -15 1268.00   31.84
   5  -1 -15 1200.24   34.42
  -4   5 -15 1261.43   17.66
   1   4  15 1383.61   18.65
  -5   1  15 1316.58   25.57
  -1  -4 -15 1192.67   29.62
   1  -5 -15 1241.37   29.08
  -4  -1  15 1185.08   26.78
  -1   5  12  148.20   10.39
  -5   4 -12  128.30   10.57
   4   1 -12  146.73   10.67
  -4   5 -12  144.21   11.74
  -5   4 -12  145.17   11.19
  -4   5 -12  148.58   11.20
   4   1 -12  144.91   11.58
   1   4  12  150.62    5.73
   5  -1 -12  158.54   11.02
   5  -1 -12  142.73   11.94
  -1  -4 -12  134.30    9.81
   1  -5 -12  147.68   10.00
  -5   1  12  151.32    8.58
  -4  -1  12  139.58    9.24
   1   4   9   34.83    4.14
  -4   5  -9   39.79    5.88
  -1   5   9   38.37    4.90
   4   1  -9   31.35    3.90
  -5   4  -9   32.87    4.83
   1   4   9   38.95    3.09
   4   1  -9   35.03    5.53
   5  -1  -9   38.00    6.44
   1  -5  -9   52.10    5.79
  -4  -1   9   51.14    6.08
  -1  -4  -9   54.03    6.25
   1   4   6 1192.31   21.62
  -1   5   6 1177.37   26.60
  -5   4  -6 1129.32   27.71
  -4   5  -6 1130.98   29.50
   1   4   6 1197.57   19.06
   5  -1  -6 1166.60   34.55
   4   1  -6 1116.05   31.09
  -4  -1   6 1162.55   27.29
  -1  -4  -6 1188.98   29.08
   1  -5  -6 1230.42   28.04
  -5   4  -3  237.35   12.36
  -1   5   3  245.24   12.00
  -4   5  -3  254.87   13.31
   1   4   3  250.27    9.76
   5  -1  -3  256.35   16.25
   4   1  -3  237.64   14.38
   1  -5  -3  226.57   11.82
   1  -5  -3  217.85   10.78
  -1  -4  -3  233.42   12.87
  -4   5   0  358.99   15.82
  -5   4   0  338.86   14.45
  -5   1   0  349.39   10.50
  -1   5   0  372.83   14.85
   1   4   0  364.48   12.20
   4   1   0  388.54   18.69
   4  -5   0  381.94    9.20
   5  -1   0  390.81   19.68
   1  -5   0  413.62   15.63
  -1  -4   0  384.70   15.71
   1  -5   0  371.75   14.33
  -1  -4   0  415.63   16.92
  -4   5   3  832.62   24.59
  -5   4   3  849.09   23.77
  -1  -4   3  859.12   20.20
  -5   1  -3  897.28   16.32
  -1   5  -3  870.07   23.22
   1   4  -3  855.72   19.34
   5  -4  -3  879.58   19.06
   4   1   3  893.41   27.91
   4  -5  -3  863.02   16.16
  -1  -4   3  895.74   24.34
   1  -5   3  872.84   22.28
  -1  -4   3  873.05   23.32
  -5   1  -6  547.16   13.53
  -4   5   6  550.04   20.65
  -5   4   6  531.60   19.75
  -1  -4   6  532.89   16.68
  -1   5  -6  531.29   18.88
   1   4  -6  511.24   16.90
  -1   5  -6  529.84   18.49
   5  -4  -6  521.90   15.59
   4  -5  -6  570.15   14.86
   4   1   6  540.19   21.33
  -5   1  -6  505.96   19.65
   1  -5   6  561.89   17.32
  -1  -4   6  557.60   18.84
  -1  -4   6  570.04   18.99
  -1  -4   9   11.93    3.01
   1  -5   9   13.71    2.62
   5  -1   9   11.40    3.64
  -1  -4   9    8.79    1.43
  -5   1  -9    9.37    2.33
  -1   5  -9   11.05    2.74
   1   4  -9   10.19    3.00
  -4  -1  -9   12.91    2.19
  -4   5   9    8.21    2.53
   4  -5  -9   12.14    2.43
   5  -4  -9   10.95    2.29
   5  -4  -9   10.77    3.60
  -5   1  -9    9.88    2.92
   5  -1  12   25.64    4.43
   5  -4 -12   46.25    4.32
  -1  -4  12   25.33    3.81
   4   1  12   37.11    6.45
  -1   5 -12   31.33    5.32
   1   4 -12   37.67    6.02
  -4  -1 -12   34.92    4.30
  -5   1 -12   34.15    5.09
   4  -5 -12   29.82    3.91
   5  -4 -12   30.95    4.34
   4  -5 -12   30.06    4.54
  -1  -4  12   26.85    4.02
   5  -4 -12   23.52    4.70
   1  -5  12   28.52    3.79
  -5   1 -12   24.26    4.49
  -1  -4  15 1373.08   30.87
   4   1  15 1786.30   48.13
   5  -1  15 1229.29   31.45
   1   4 -15 1701.58   43.00
  -4  -1 -15 1414.32   30.60
  -5   1 -15 1517.92   36.03
  -1   5 -15 1396.46   37.04
   4  -5 -15 1428.16   29.32
   4  -5 -15 1430.05   29.68
   5  -4 -15 1412.86   34.73
   5  -4 -15 1391.35   30.24
   1  -5  15 1384.27   25.20
  -1  -4  15 1373.95   26.53
  -5   1 -15 1305.11   33.00
  -4  -1 -15 1386.87   36.98
   5  -1  18  117.62   10.03
   4   1  18  129.85   11.47
  -1  -4  18  127.44    9.88
  -4  -1 -18  132.92   10.19
  -5   1 -18  149.92   12.48
  -1   5 -18  131.31   12.27
   1   4 -18  146.56   12.93
  -1   5 -18  125.34    7.41
   4  -5 -18  126.60    9.29
   4  -5 -18  130.12    8.96
   5  -4 -18  124.03   10.39
   5  -4 -18  122.86    9.44
   1  -5  18  126.75    7.48
   4  -5 -18  143.04    5.77
  -5   1 -18  109.03    9.62
  -4  -1 -18  111.94    9.46
  -1  -4  18  118.04    7.46
  -4  -1 -18  114.02   10.25
   4   1  21  115.31   10.15
  -1  -4  21  151.73   11.31
   5  -1  21  145.75   12.14
  -4   5  21  149.74    6.59
   1   4 -21  170.24   14.73
  -4  -1 -21  124.00   10.55
  -5   1 -21  143.19   12.54
  -1   5 -21  143.72   13.47
   1   4 -21  142.59    9.90
   4  -5 -21  147.84   10.52
   5  -4 -21  157.55   12.12
  -1   5 -21  143.22    8.35
   4  -5 -21  150.81    9.70
   5  -4 -21  152.64   10.78
   1  -5  21  158.71    8.05
  -1  -4  21  141.81    7.56
  -4  -1 -21  134.81   10.46
   4  -5 -21  171.02    6.84
  -5   1 -21  146.82   11.47
  -4  -1 -21  130.50   10.93
   4   1  24   78.34    8.38
  -4   5  24  114.79    5.92
   5  -1  24  117.46   11.59
  -1   5 -24   99.15   12.05
   1   4 -24  103.26   12.42
  -5   1 -24   90.85   10.44
  -4  -1 -24   85.87    9.27
  -1   5 -24  106.58    7.58
   5  -4 -24  100.28    9.86
   1   4 -24  107.95    8.80
   4  -5 -24  124.82   10.25
   5  -4 -24  129.53   10.45
   4  -5 -24  102.72    8.12
  -4  -1 -24  110.58   10.00
  -5   1 -24  138.34   11.87
  -1  -4  24  103.11    6.03
  -4  -1 -24  116.35   10.03
  -1  -4  27   14.74    2.17
   5  -1  27   19.31    5.22
  -5   4  27   21.12    3.80
  -4  -1 -27   14.52    2.98
   4   1  27   15.21    4.35
   1   4 -27   15.41    5.17
  -4  -1 -27   14.95    3.87
  -5   1 -27   20.24    4.84
  -1   5 -27   14.96    4.67
   5  -4 -27   16.51    4.31
   5  -4 -27   17.87    3.14
   1   4 -27   19.17    3.71
   4  -5 -27   19.96    4.19
  -1   5 -27   15.47    2.80
  -5   1 -27   22.39    4.87
  -4  -1 -27   14.40    2.81
   4   1  30  141.45   11.71
  -5   4  30  156.33    9.47
   1   4 -30  207.16   18.83
  -4  -1 -30  139.78   13.00
  -1   5 -30  155.52   14.67
  -5   1 -30  163.71   14.70
   4  -5 -30  158.88   12.10
  -1   5 -30  153.52    9.90
   5  -4 -30  160.58   12.20
   1   4 -30  151.91   11.01
  -5   1 -30  149.00   10.03
  -4  -1 -30  162.62   11.71
  -4  -1 -30  129.44   10.30
  -5   1 -30  186.26   15.67
   4   1  33  784.61   28.96
  -5   4  33  840.06   23.16
  -5   1 -33  836.34   34.55
   1   4 -33 1037.26   43.28
  -4  -1 -33  721.95   30.71
  -1   5 -33  810.07   34.33
   4  -5 -33  902.21   30.10
  -1   5 -33  872.45   25.49
   1   4 -33  848.47   27.25
   5  -4 -33  891.88   29.52
  -4  -1 -33  684.02   23.91
  -5   1 -33 1123.93   39.09
  -4  -1 -33 1022.58   30.02
  -5   1 -33  785.36   22.64
   4   1  36    9.55    3.76
  -5   4  36   11.47    3.37
  -4  -1 -36   12.75    3.31
  -4  -1 -36    8.96    3.47
   1   4 -36   20.04    6.84
  -1   5 -36   10.22    4.30
  -5   1 -36    7.61    3.97
   4  -5 -36    9.95    3.82
  -1   5 -36   12.08    3.31
   1   4 -36   10.62    1.68
   5  -4 -36   11.35    3.10
  -4  -1 -36    8.15    2.41
   4   1  39    1.36    2.00
   5  -1  39    3.36    3.70
   1   4 -39    5.02    0.68
  -1   5 -39    1.74    1.83
  -4  -1 -39    2.69    3.55
  -5   1 -39    2.87    1.22
   4  -5 -39    4.20    1.06
   1   4 -39    1.79    1.35
  -1   5 -39    4.29    2.84
   5  -4 -39    2.23    2.76
  -4  -1 -39    2.99    1.60
   4   1  42  421.75   23.08
   5  -1  42  497.10   27.39
  -1   5 -42  354.72   24.81
  -4  -1 -42  366.10   24.45
   1   4 -42  457.96   30.15
  -5   1 -42  375.21   25.05
  -4  -1 -42  554.30   30.02
   4  -5 -42  452.18   23.29
  -1   5 -42  458.99   21.54
  -5   1 -42  535.58   27.70
   1   4 -42  470.01   23.04
   5  -4 -42  437.41   22.75
  -4  -1 -42  375.98   18.56
   4   1  45  121.46   12.74
   5  -1  45  124.64   13.42
   4  -5 -45  125.35   12.55
   1   4 -45  123.65   11.93
  -5   1 -45  140.15   14.02
  -4  -1 -45  141.17   15.21
   5  -4 -45  121.46   12.15
  -1   5 -45  120.47   11.79
  -1   5 -45   93.15   12.53
  -4  -1 -45  112.55   14.18
   1   4 -45  106.34   14.55
  -5   1 -45  113.57   14.17
   4   1  48   15.10    5.13
   5  -1  48   15.68    4.46
  -1   5 -48   18.98    5.10
  -4  -1 -48   21.59    5.69
  -5   1 -48   14.93    3.98
   4  -5 -48   20.96    5.17
   5  -4 -48   10.79    1.74
   1   4 -48   17.45    3.40
  -1   5 -48   11.10    5.22
  -4  -1 -48   10.45    5.56
  -5   1 -48   12.01    5.89
   1   4 -48    9.65    5.06
   5  -1  51  373.58   23.88
   4  -5 -51  303.42   20.30
   1   4 -51  336.04   21.39
  -5   1 -51  361.42   22.85
  -4  -1 -51  373.45   25.19
   5  -4 -51  316.53   20.51
  -1   5 -51  260.27   21.94
  -4  -1 -51  251.22   22.40
  -5   1 -51  292.45   23.72
   1   4 -51  303.09   24.67
   5  -1  54   76.09   10.99
  -4  -1 -54   58.33   11.11
   1   4 -54   61.62   11.23
  -1   5 -54   45.03    8.87
  -5   1 -54   60.61   11.55
   1   4 -54   89.73   11.73
   4  -5 -54   67.90   10.07
  -5   1 -54   82.54   10.90
  -4  -1 -54   95.59   12.81
   5  -4 -54   83.67   10.71
  -5   1 -57    3.92    0.81
   1   4 -57   11.30    4.62
  -1   5 -57    6.05    4.35
  -4  -1 -57    2.09    5.25
   1   4 -57   11.43    3.66
   4  -5 -57    6.25    1.52
   5  -4 -57    6.38    1.34
  -4  -1 -57    6.71    0.70
  -5   1 -57    7.25    1.54
   1   4 -60   -5.19    5.98
  -4  -1 -60   -5.82    9.71
  -1   5 -60    6.15    5.92
  -5   1 -60    3.67    3.24
  -4  -1 -60    3.04    3.77
  -5   1 -60    0.43    0.66
   5  -4 -60    3.54    2.62
   4  -5 -60    1.59    2.65
  -1   5 -63   79.95   12.77
  -4  -1 -63   60.25    7.38
   1   4 -63   88.52   14.22
  -5   1 -63   88.67   15.21
   4  -5 -63   97.80   11.69
   5  -4 -63   95.07   11.65
  -5   1 -63  106.28   13.46
  -4  -1 -63  112.79   14.40
  -5   1 -66   27.02    9.53
  -5   1 -66   32.50    8.55
  -5   5 -64   17.48    7.84
   5   0 -64   22.75    7.24
  -5   5 -61    1.45    2.26
   5   0 -61   -3.16    4.09
   0  -5 -61    0.36    3.99
  -5   5 -58  150.76   18.79
   0  -5 -58  167.31   16.20
   5   0 -58  163.89   16.35
  -5   5 -55   -0.72    2.88
   5   0 -55    5.44    2.11
   0  -5 -55   -0.52    1.96
  -5   5 -52  128.00   17.01
   0  -5 -52  129.86   13.61
   5   0 -52  133.04   13.94
  -5   5 -49    0.58    4.61
   0  -5 -49   -0.38    2.28
   5   0 -49    3.85    1.82
  -5   5 -46   71.11   11.74
   0  -5 -46   48.37    7.86
   5   0 -46   48.19    8.09
   0  -5 -46   46.08    6.87
  -5   0  43   -4.34    3.97
  -5   5 -43   -2.27    1.92
  -5   5 -43   -1.35    1.18
   5   0 -43    1.44    3.00
   0  -5 -43   -1.20    2.66
   0  -5 -43    0.58    1.06
  -5   0  40  395.73   22.17
   5   0 -40  332.44   26.39
  -5   5 -40  352.42   25.96
   0  -5 -40  376.89   21.37
  -5   5 -40  380.80   18.03
   5   0 -40  377.30   21.70
   0  -5 -40  328.55   16.24
   0  -5 -40  418.26   18.37
  -5   0  37    3.32    1.25
   0  -5 -37    2.26    1.33
  -5   5 -37    5.32    3.36
  -5   5 -37    0.43    1.58
   5   0 -37    2.94    1.32
   0  -5 -37    4.51    3.17
   0  -5 -37    3.85    1.76
  -5   0  34  989.40   33.46
   5   0 -34  920.24   42.94
  -5   5 -34  969.33   42.95
   5   0 -34  987.05   33.58
  -5   5 -34  956.12   26.07
   0  -5 -34  976.23   32.52
   0  -5 -34  861.39   26.08
   0  -5 -34 1024.66   28.57
  -5   0  31    1.16    2.05
   0  -5 -31    2.40    0.93
  -5   5 -31    4.84    4.54
   5   0 -31   -1.29    6.16
   5   0 -31    0.68    0.42
   0  -5 -31    4.44    1.23
  -5   5 -31    1.91    1.09
   0  -5 -31    2.33    0.64
  -5   0  28 1735.46   41.92
  -5   5 -28 1820.54   54.08
   5   0 -28 1779.85   55.49
  -5   5 -28 1618.84   30.47
   5   0 -28 1828.01   43.97
   0  -5 -28 1728.99   36.53
   0  -5 -28 1696.15   37.79
  -5   0  25    4.73    3.85
   0  -5 -25    4.94    1.91
  -5   5 -25    2.75    1.75
   5   0 -25    0.89    1.74
  -5   5 -25    1.89    0.31
   5   0 -25    3.37    3.44
   0  -5 -25    4.44    1.69
  -5   5 -22  264.75   19.22
   5   0 -22  255.05   17.93
   5   0 -22  282.74   16.32
   0  -5 -22  249.72   14.01
   0  -5 -19    2.46    1.82
  -5   5 -19    2.35    2.61
   5   0 -19    0.82    1.40
   5   0 -19    2.40    1.70
  -5   0  19    1.61    1.65
  -5   5 -16   92.96   10.57
   5   0 -16   85.87    9.63
   5   0 -16  100.56    9.83
  -5   0  16  116.89    8.54
   0   5  13    3.74    2.33
  -5   5 -13    2.20    2.01
  -5   5 -13    2.95    0.86
   0  -5 -13    1.98    1.07
   5   0 -13    4.03    2.84
  -5   0  13    0.41    0.63
   0   5  10  388.46   15.35
  -5   5 -10  372.38   18.29
   5   0 -10  370.79   19.33
  -5   0  10  404.54   15.81
   0  -5 -10  434.25   18.37
   0   5   7    0.31    1.02
  -5   5  -7    0.93    0.53
   0  -5  -7    2.66    0.87
   0  -5  -7    0.21    1.44
   5   0  -7   -0.22    1.01
   0  -5  -4  823.27   16.56
  -5   5  -4  753.24   23.69
   0   5   4  791.08   20.51
   5   0  -4  753.30   28.58
   0  -5  -4  775.19   22.55
  -5   5  -1    1.59    1.44
   0   5   1    1.99    1.46
   0  -5  -1    1.01    0.30
   0  -5  -1    1.69    1.67
   0  -5  -1    6.33    2.03
   5   0  -1    2.24    1.89
   0  -5   2    7.09    2.58
   0  -5   2    7.81    1.97
  -5   5   2    3.74    1.63
  -5   0  -2    6.19    1.06
   0   5  -2    7.52    2.69
   5  -5  -2    5.62    1.29
   0  -5   2    7.00    2.57
   5   0   2    3.12    1.97
   0  -5   5    2.23    1.02
   0  -5   5    1.32    0.21
   0   5  -5    1.09    1.31
  -5   5   5    4.61    1.91
   0   5  -5    3.78    1.89
   5  -5  -5    3.45    1.38
   5   0   5    1.95    0.67
   0  -5   5    1.17    1.87
   0  -5   8 2797.44   39.81
  -5   5   8 2918.89   49.93
   5   0   8 3107.68   59.39
   0   5  -8 2748.58   44.00
  -5   0  -8 2973.98   34.80
   5  -5  -8 2778.68   36.60
   0  -5   8 2817.72   41.79
   0  -5  11    0.28    1.13
   0  -5  11    2.35    1.54
   5   0  11    2.04    0.82
   0   5 -11    3.73    2.61
  -5   0 -11    1.50    0.62
   5  -5 -11    4.01    1.61
   5  -5 -11    2.14    1.58
  -5   0 -11    0.07    1.55
   5   0  14 1228.54   34.50
  -5   0 -14 1361.90   29.17
   0   5 -14 1313.22   35.45
   5  -5 -14 1270.46   31.99
   5  -5 -14 1418.00   29.92
  -5   0 -14 1240.30   34.02
   0  -5  14 1349.53   26.76
   0  -5  17    1.70    1.14
   5   0  17    2.17    2.36
   0   5 -17    2.13    2.47
  -5   0 -17    3.15    2.01
   5  -5 -17    1.69    1.45
   5  -5 -17    4.96    2.46
  -5   0 -17    3.67    2.80
   0   5 -20 2418.49   55.64
  -5   0 -20 2152.41   42.91
   5  -5 -20 2310.94   43.49
   5  -5 -20 2352.40   42.34
  -5   0 -20 2149.41   44.46
   0  -5  20 2282.32   31.94
   5   0  23   -0.89    2.38
   0  -5  23    1.78    0.82
   0   5 -23    4.23    2.72
  -5   0 -23    1.27    1.93
   5  -5 -23    2.74    1.48
   5  -5 -23    1.35    1.62
   0   5 -23    2.46    1.53
  -5   0 -23    3.03    2.62
   5   0  26   24.36    5.49
  -5   0 -26   29.24    4.93
  -5   5  26   36.67    4.31
  -5   0 -26   30.45    5.64
   0   5 -26   29.53    7.29
   5  -5 -26   41.47    6.00
   5  -5 -26   30.43    5.57
   0   5 -26   33.16    5.12
   0  -5  26   41.72    4.13
  -5   0 -26   37.12    5.72
  -5   5  29    2.14    0.89
   5   0  29    4.04    2.44
  -5   0 -29    1.60    0.10
  -5   0 -29    3.37    1.78
   0   5 -29    0.71    0.63
   5  -5 -29    0.16    2.06
   5  -5 -29    1.97    1.14
  -5   0 -29    0.82    1.53
   5   0  32   50.87    7.57
  -5   5  32   47.65    4.66
   0   5 -32   49.81    8.88
  -5   0 -32   38.24    6.66
   5  -5 -32   45.66    6.63
   0   5 -32   54.30    6.80
  -5   0 -32   47.40    6.05
  -5   0 -32   38.48    5.94
  -5   0 -35    2.19    1.42
   5   0  35    4.81    2.81
  -5   0 -35   -0.28    2.43
   0   5 -35    4.51    2.69
   5  -5 -35    4.62    1.73
   0   5 -35    1.14    0.69
  -5   0 -35   -1.24    1.89
   5   0  38  213.35   16.62
   0   5 -38  193.34   17.51
  -5   0 -38  184.85   16.13
   0   5 -38  225.39   14.35
   5  -5 -38  225.05   16.00
  -5   0 -38  182.05   13.30
   5   0  41    6.18    3.92
   0   5 -41    1.00    2.54
   5  -5 -41    1.38    0.82
  -5   0 -41    2.70    3.70
   0   5 -41   -0.31    3.68
   5   0  44   68.47   10.00
   0   5 -44   89.45    9.61
   5  -5 -44   89.54   10.47
   0   5 -44   53.69    9.89
  -5   0 -44   50.66    8.52
   5   0  47    2.90    2.56
   5  -5 -47    4.90    2.70
   0   5 -47    1.69    1.97
  -5   0 -47    1.57    0.28
  -5   0 -47   -1.95    4.32
   0   5 -47    4.96    5.08
   5   0  50   15.06    3.86
   0   5 -50   14.42    5.52
  -5   0 -50   11.35    3.00
   5  -5 -50   25.61    5.47
  -5   0 -50   31.31    6.17
   0   5 -53   -1.14    1.00
  -5   0 -53    0.91    3.28
   5  -5 -53    5.78    3.33
  -5   0 -53   -2.63    2.18
   0   5 -56  258.07   22.02
  -5   0 -56  272.02   24.00
   5  -5 -56  283.70   20.69
   0   5 -59   -0.51    2.45
  -5   0 -59    7.53    3.75
   5  -5 -59    2.24    3.56
  -5   0 -59    3.32    3.08
  -5   0 -62  214.35   22.32
   0   5 -62  219.41   21.26
  -5   0 -62  293.79   23.01
   5  -5 -62  264.75   20.18
  -5   0 -65   -6.90    4.39
   3  -6   0  756.47   22.23
  -6   3   0  715.61   19.94
  -3   6   0  744.39   23.44
   3   3   0  710.59   12.27
   3  -6   0  798.57   13.45
   3   3   0  750.15   22.43
  -3  -3   0  782.51   27.01
  -6   3  -3  721.65   20.12
   6  -3   3  742.09   23.34
  -6   3   3  727.64   21.36
  -3   6   3  723.15   23.51
   3  -6   3  748.42   22.05
   3  -6  -3  764.54   22.51
  -3   6  -3  733.88   23.84
   3   3  -3  733.33   15.40
   3  -6   3  808.90   10.66
   3   3  -3  727.61   22.40
   3  -6  -3  785.62   15.56
   6  -3  -3  720.56   28.02
   3   3   3  748.14   22.37
  -3  -3   3  721.49   25.59
  -6   3  -3  884.93   24.59
   3  -6  -3  755.30   19.15
  -3  -3   3  752.71   24.01
  -3  -3  -3  814.12   28.52
  -6   3   3  888.02   22.29
   3   3   6  101.25    4.23
   3  -6  -6   96.02    8.08
  -6   3  -6  108.26    8.03
  -6   3   6  103.17    8.53
  -3   6   6  107.34    9.18
   6  -3  -6  131.14   10.29
  -3   6  -6  102.27    9.17
   3   3  -6  108.48    6.99
   3   3  -6  106.54    8.77
   3   3   6  110.74    8.64
   3  -6  -6  105.45    6.44
   6  -3  -6  107.23   10.93
  -3  -3  -6  108.80   10.58
  -6   3  -6  108.16    8.65
  -6   3   6  106.18    6.72
  -3  -3   6  106.77    8.94
  -3  -3   6  101.12    9.55
   3  -6  -6   98.95    6.77
  -3   6   9 1471.51   36.02
  -6   3  -9 1341.33   30.05
   3   3   9 1395.33   17.53
   3  -6  -9 1248.68   29.54
   3   3  -9 1382.85   27.89
  -3   6  -9 1352.00   34.59
   3  -6  -9 1331.15   24.35
   6  -3  -9 1363.46   30.88
   6  -3  -9 1356.58   38.48
   3   3  -9 1379.51   33.44
   3   3   9 1506.72   32.17
  -6   3  -9 1350.86   31.65
  -3  -3  -9 1398.00   38.25
  -3  -3   9 1226.53   32.00
  -3  -3   9 1277.30   30.39
  -3   6  12   75.62    8.43
   3  -6 -12   95.29    8.39
  -3   6 -12   67.09    8.17
   3   3 -12   79.37    7.22
  -6   3 -12   74.31    7.61
   3  -6 -12   88.20    6.88
   3  -6 -12   69.11    5.05
   3   3 -12   85.74    8.85
   6  -3 -12   82.43    7.59
   6  -3 -12   70.57    9.36
   3   3  12   85.63    7.62
  -3  -3 -12  101.10   10.08
  -3  -3  12   82.34    7.77
  -3  -3  12   76.72    7.55
  -6   3 -12  104.64    9.39
   3  -6 -15  965.47   26.41
  -3  -3  15  886.48   27.39
  -3   6 -15  840.31   30.24
   3   3 -15  831.91   25.76
  -6   3 -15  843.94   28.47
   3  -6 -15  903.67   23.45
   6  -3 -15  921.36   27.10
   3   3  15  806.85   22.79
   3  -6 -15  936.80   17.98
   6  -3 -15  814.75   29.45
  -3  -3 -15 1012.70   32.27
  -3  -3  15  781.16   24.11
  -6   3 -15 1007.97   29.72
   3  -6 -18  983.22   26.92
  -3  -3  18  979.79   29.42
   3   3 -18 1044.34   30.79
  -6   3 -18 1009.21   33.04
  -3   6 -18  977.43   34.23
  -3   6 -18  924.49   15.29
   6  -3 -18  989.34   32.51
   3  -6 -18  977.05   16.36
   3  -6 -18  984.58   25.70
   6  -3 -18 1019.29   29.11
  -3  -3  18  877.64   24.84
  -3  -3 -18 1090.68   33.31
  -6   3 -18 1011.89   29.93
   3  -6 -21  411.00   17.58
  -3  -3  21  413.46   19.63
  -3   6 -21  429.30   23.62
   3   3 -21  447.25   21.56
  -6   3 -21  448.61   23.81
   6  -3 -21  425.11   19.33
   3  -6 -21  412.18   17.44
   6  -3 -21  390.34   21.23
  -3   6 -21  373.00   10.87
  -3  -3 -21  417.23   21.15
  -3  -3 -21  424.53   20.88
  -3  -3  21  362.16   15.46
  -6   3  21  465.07   12.37
  -3  -3  24  264.50   16.16
   3  -6 -24  264.76   14.20
  -3   6 -24  260.35   19.40
   3   3 -24  253.12   16.97
  -6   3 -24  272.15   19.64
   6  -3 -24  237.92   17.08
   3  -6 -24  235.17   13.97
   3   3 -24  272.78   15.65
   6  -3 -24  247.52   15.68
  -3   6 -24  235.67    9.54
  -3  -3 -24  262.61   16.17
   3  -6 -24  267.52   12.00
  -3  -3  24  217.58   11.58
  -3  -3 -24  267.98   17.09
  -3  -3  27  758.29   28.54
   3  -6 -27  753.95   24.33
  -3   6 -27  777.51   34.21
   3   3 -27  749.90   30.62
  -6   3 -27  826.45   36.79
   6  -3 -27  749.21   30.75
   3  -6 -27  737.07   25.37
   3   3 -27  753.91   26.40
   6  -3 -27  712.81   26.38
  -3   6 -27  691.82   18.37
  -3  -3  27  686.35   20.41
  -3  -3 -27  805.47   28.43
  -3  -3 -27  726.71   27.72
  -3  -3  30  995.79   33.62
  -6   3  30  911.25   27.74
  -6   3 -30  942.09   39.08
   3   3 -30  942.36   36.09
  -3   6 -30  953.09   39.74
   3   3 -30  879.94   28.88
   6  -3 -30  961.28   35.73
   6  -3 -30  902.56   30.28
  -3   6 -30  859.35   22.33
   3  -6 -30  889.43   28.80
  -3  -3 -30  998.13   31.00
  -3  -3 -30  867.99   29.97
  -3  -3  33  150.37   13.41
  -6   3  33  146.59   11.18
  -6   3 -33  134.35   14.93
   3   3 -33  123.13   13.97
  -3   6 -33  127.23   15.19
   3   3 -33  139.60   12.10
   3  -6 -33  149.04   12.34
   6  -3 -33  152.60   12.91
  -3   6 -33  155.50   10.26
  -3  -3 -33  124.94   10.92
   3  -6 -33  182.64   11.31
  -3  -3 -33  170.52   12.82
  -3  -3 -36   19.24    4.66
  -6   3  36   15.64    3.88
   3   3 -36   19.08    5.88
  -3   6 -36   19.86    6.85
  -6   3 -36   18.20    5.90
   6  -3 -36   14.36    4.19
   3  -6 -36   15.99    4.13
  -3   6 -36   19.11    4.20
   3   3 -36   17.56    4.29
  -3  -3 -36   14.33    3.09
  -6   3  39  269.86   15.67
  -6   3 -39  292.05   23.49
  -3   6 -39  279.40   22.41
   3   3 -39  307.85   23.57
   3  -6 -39  254.50   17.00
   6  -3 -39  274.71   17.97
   3   3 -39  286.01   17.97
  -3  -3 -39  210.35   13.26
  -6   3  42   31.82    5.32
   3   3 -42   34.47    8.15
  -6   3 -42   30.78    6.93
  -3   6 -42   29.08    7.11
  -3  -3 -42   41.25    7.72
   6  -3 -42   32.36    6.05
   3  -6 -42   28.39    5.54
   3   3 -42   29.58    5.74
  -6   3 -42   40.92    7.48
  -3  -3 -42   24.52    4.59
  -6   3 -45  251.86   22.63
   3   3 -45  258.09   22.76
  -3   6 -45  237.73   21.16
   3   3 -45  273.27   18.83
   3  -6 -45  269.07   18.20
  -6   3 -45  283.22   18.56
   6  -3 -45  256.26   18.20
  -3  -3 -45  207.70   13.14
  -6   3 -48  159.04   17.82
   3   3 -48  182.54   19.86
  -3   6 -48  163.85   17.88
   3  -6 -48  174.42   15.13
   3   3 -48  181.62   15.86
  -3  -3 -48  210.36   19.27
  -6   3 -48  179.85   14.84
   6  -3 -48  165.87   15.07
  -3  -3 -48  125.68   10.32
  -3   6 -51   87.17   13.23
   3   3 -51   92.06   14.55
  -6   3 -51   71.28   12.34
   3   3 -51   94.18   11.48
  -6   3 -51   88.69   10.42
  -3  -3 -51  101.74   13.08
   6  -3 -51   85.47   10.80
   3  -6 -51   83.95   10.83
  -3   6 -54   62.22   11.45
   3   3 -54   63.94   11.66
  -6   3 -54   50.02   10.54
   6  -3 -54   48.98    7.68
   3   3 -54   54.79    8.78
   3  -6 -54   54.00    7.93
  -3  -3 -54   59.75    9.91
  -6   3 -54   49.97    7.31
  -3   6 -57  201.14   20.44
  -6   3 -57  192.22   20.06
   3   3 -57  220.42   23.47
   3  -6 -57  189.79   16.98
  -6   3 -57  192.49   16.55
  -3  -3 -57  229.41   21.07
   3   3 -57  224.60   18.55
   6  -3 -57  192.24   17.12
  -6   3 -60    2.44    3.29
   3   3 -60   13.87    7.82
  -3   6 -60    2.78    4.68
   6  -3 -60    5.70    2.39
   3  -6 -60   10.11    5.73
   3   3 -60    3.70    2.26
  -3  -3 -60    4.39    3.55
  -6   3 -63   73.75   14.08
   3   3 -63   79.77   15.89
  -3  -3 -63  109.25   15.49
   3   3 -63   92.43   12.42
   6  -3 -63   85.55   11.96
  -6   3 -66  272.76   25.59
  -6   4 -64   80.88   13.50
   4   2 -64   83.96   12.43
   4   2 -61    0.01    7.70
  -4   6 -61    3.67    5.10
  -6   4 -61    7.80    4.72
   6  -2 -61    9.25    4.13
   4   2 -61    6.78    3.77
   2  -6 -61   -0.74    5.13
  -2  -4 -61    8.37    2.37
  -4   6 -58    8.15    3.27
   4   2 -58    9.99    3.71
  -6   4 -58    2.04    2.69
   6  -2 -58   16.08    6.38
   2  -6 -58   10.40    3.75
  -2  -4 -58    9.82    2.26
   4   2 -58   12.68    4.39
  -4   6 -55   21.34    6.08
  -6   4 -55   17.08    4.37
   4   2 -55   30.98   10.02
   4   2 -55   27.47    6.58
  -2  -4 -55   35.14    7.98
   6  -2 -55   28.26    7.30
   2  -6 -55   25.93    5.44
  -4   6 -52  146.13   17.39
   4   2 -52  161.60   19.80
  -6   4 -52  117.32   16.29
   4   2 -52  139.34   13.98
   6  -2 -52  136.56   14.00
  -2  -4 -52  158.30   16.21
   2  -6 -52  136.53   13.73
  -6   4 -49   14.87    5.65
   4   2 -49   12.15    5.14
  -4   6 -49    9.35    3.04
  -6   4 -49   11.07    3.48
   2  -6 -49    7.73    3.37
  -2  -4 -49    9.06    2.58
   6  -2 -49   11.55    2.74
   4   2 -49   11.04    4.48
  -2  -4 -49    7.26    2.13
   4   2 -46   39.31    8.71
  -4   6 -46   30.53    7.97
  -6   4 -46   37.88    9.34
   6  -2 -46   36.98    7.06
   2  -6 -46   42.23    7.41
  -2  -4 -46   47.68    7.94
  -6   4 -46   46.88    7.20
   4   2 -46   45.76    7.56
  -2  -4 -46   32.46    5.32
  -6   2  43   15.92    3.47
  -4   6 -43   15.61    5.82
   4   2 -43   18.96    6.29
  -6   4 -43   17.95    4.19
   6  -2 -43   25.55    5.46
   2  -6 -43   21.32    5.05
   4   2 -43   18.15    3.93
  -2  -4 -43   25.17    5.68
  -6   4 -43   24.50    5.13
  -2  -4 -43   16.26    4.20
   2  -6 -40  460.45   19.66
  -4  -2  40  445.13   24.90
  -6   2  40  407.73   20.80
   4   2 -40  427.88   28.55
  -4   6 -40  402.61   28.16
  -6   4 -40  423.22   28.78
   4   2 -40  427.19   23.17
   6  -2 -40  388.08   21.72
  -6   4 -40  402.10   19.64
   2  -6 -40  394.83   21.16
  -2  -4 -40  441.50   25.23
  -4  -2  37  163.98   14.06
  -6   2  37  149.57   12.26
   2  -6 -37  169.78   11.68
  -6   4 -37  136.64   16.29
  -4   6 -37  119.16   14.68
   4   2 -37  140.43   15.62
   4   2 -37  151.17   13.46
   6  -2 -37  152.72   13.39
   2  -6 -37  152.79   12.84
  -6   4 -37  159.54   12.14
  -2  -4 -37  122.81   10.09
   2  -6 -37  201.60   13.92
  -2  -4 -37  165.70   12.15
  -2  -4 -34    7.43    2.91
   2  -6 -34    5.05    2.73
  -6   2  34    5.11    9.69
  -4  -2  34    2.16    1.31
  -4   6 -34    2.88    1.93
   4   2 -34    3.50    3.35
  -6   4 -34    5.06    3.14
   2  -6 -34    3.82    2.80
  -4   6 -34    6.10    2.27
   4   2 -34    5.50    2.46
   6  -2 -34    4.29    2.08
   2  -6 -34    3.03    0.56
  -2  -4 -34    5.39    2.35
   2  -6 -31   20.43    4.08
  -4  -2  31   19.98    5.36
  -2  -4 -31   20.83    4.74
  -6   2  31   20.41    4.56
  -4   6 -31   17.43    5.30
  -6   4 -31   16.80    5.83
   4   2 -31   24.45    6.17
  -4   6 -31   26.04    3.74
   4   2 -31   23.44    4.81
   6  -2 -31   19.90    4.75
   2  -6 -31   21.77    4.39
   6  -2 -31   19.36    3.44
   2  -6 -31   18.63    3.62
  -2  -4 -31   15.25    3.96
  -6   2  28  353.40   18.31
  -4  -2  28  361.51   20.22
  -6   4 -28  356.75   24.06
  -4   6 -28  345.66   24.16
   4   2 -28  357.61   22.29
  -4   6 -28  381.91   14.51
   6  -2 -28  365.99   22.72
   2  -6 -28  350.42   17.89
   4   2 -28  353.71   18.99
   6  -2 -28  359.01   19.12
   2  -6 -28  369.19   15.85
  -2  -4 -28  345.31   18.75
   2  -6 -28  360.88   16.98
  -2  -4 -28  369.85   18.05
  -4  -2  25  118.24   10.84
  -4   6 -25  121.74   13.71
  -6   4 -25  121.77   13.78
   4   2 -25  123.67   12.44
  -4   6 -25  105.54    6.83
   4   2 -25  133.98   11.40
   2  -6 -25  114.66    9.90
   6  -2 -25  116.55   10.57
   6  -2 -25  117.61   12.20
  -2  -4 -25  112.00   10.06
   2  -6 -25  123.17    9.20
  -2  -4 -25  130.80   12.27
   2  -6 -25  118.76    9.78
  -4  -2  22   40.43    6.83
   4   2 -22   33.88    6.40
  -6   4 -22   37.18    7.55
  -4   6 -22   36.86    7.32
  -4   6 -22   39.30    3.51
   6  -2 -22   31.80    6.36
   2  -6 -22   39.49    5.45
   4   2 -22   42.95    6.24
   6  -2 -22   40.81    6.36
  -6   2  22   38.86    4.36
  -2  -4 -22   38.10    5.88
   2  -6 -22   41.96    5.72
  -4  -2  19   40.25    6.21
  -6   4 -19   30.85    6.31
   4   2 -19   23.88    5.18
  -4   6 -19   25.79    5.30
   2  -6 -19   43.44    5.77
   6  -2 -19   36.53    5.73
  -4   6 -19   40.48    3.18
   6  -2 -19   30.02    5.80
   2   4  19   22.71    3.41
  -6   2  19   41.65    4.46
   2  -6 -19   49.60    6.25
  -2  -4 -19   43.12    6.22
  -6   4 -16  444.94   22.16
  -4   6 -16  456.24   22.68
   4   2 -16  488.07   20.89
   2   4  16  527.27   15.58
   6  -2 -16  490.49   20.50
   2  -6 -16  469.11   17.50
  -4   6 -16  426.16    8.13
   6  -2 -16  451.65   22.22
   4   2 -16  481.33   22.77
  -2  -4 -16  470.18   20.46
  -4  -2  16  460.31   18.34
   2  -6 -16  480.37   19.26
   2   4  13   25.13    3.28
  -6   4 -13   32.41    5.85
   4   2 -13   29.74    4.96
  -4   6 -13   30.51    6.03
  -2   6  13   28.91    5.50
   6  -2 -13   36.31    5.43
   2  -6 -13   53.34    5.92
   4   2 -13   35.35    6.09
   2   4  13   34.61    4.14
  -2  -4 -13   47.15    6.41
  -4  -2  13   42.76    5.83
   2  -6 -13   53.20    6.54
   6  -2 -13   38.59    6.54
  -2  -4 -10   20.98    4.20
   2  -6 -10   26.27    4.58
  -2   6  10   15.74    2.98
  -6   4 -10   13.94    2.99
   2   4  10   14.80    2.57
  -4   6 -10   16.72    4.13
   4   2 -10   16.42    3.40
   4   2 -10   14.06    3.93
   2   4  10   17.06    2.75
   6  -2 -10   13.77    4.37
  -4  -2  10   22.66    4.41
   2   4   7   67.58    4.73
  -6   4  -7   55.52    6.68
  -2   6   7   72.84    7.36
  -4   6  -7   65.61    7.74
   4   2  -7   65.46    5.69
   6  -2  -7   67.72    9.05
   2   4   7   69.55    5.64
   4   2  -7   68.33    7.92
  -2  -4  -7   77.34    8.09
   2  -6  -7   67.13    5.79
   2  -6  -7   84.62    7.82
  -4  -2   7   80.87    7.58
  -6   4  -4 1162.75   27.96
  -4   6  -4 1131.30   30.67
  -2   6   4 1178.75   29.37
  -6   2   4 1125.17   25.04
   2   4   4 1148.12   19.41
   4   2  -4 1103.93   19.91
   2   4   4 1161.22   23.53
   6  -2  -4 1201.21   36.90
   4   2  -4 1188.65   31.65
   2  -6  -4 1162.23   28.64
  -2  -4  -4 1107.50   30.28
   2  -6  -4 1105.63   24.78
  -2  -4  -1    6.57    2.56
   6  -2  -1   11.11    3.89
   2  -6  -1    7.83    2.91
   2   4   1    6.14    1.54
  -6   4  -1    6.26    1.98
   2   4   1    5.18    0.88
  -6   2   1    9.62    2.99
  -4   6  -1    6.45    2.08
  -2   6   1    7.03    2.32
   2   4   1    6.09    1.68
   4  -6   1    8.69    1.19
   6  -2  -1    6.26    2.42
   2  -6  -1    8.11    2.69
   4   2  -1    8.79    2.74
  -6   2  -2  174.18    8.87
  -4   6   2  185.60   12.21
   6  -2   2  274.04   17.96
  -2   6  -2  193.91   12.10
  -6   4   2  164.10   10.74
   2   4  -2  204.21    9.34
   2   4  -2  210.04   11.27
   4  -6  -2  230.38    7.98
   4   2   2  208.78   13.86
  -2  -4   2  219.09   13.26
   2  -6   2  244.70   12.90
  -6   2  -2  215.94   12.77
  -2  -4   2  208.97   12.58
  -2   6  -5   31.95    5.20
   6  -4  -5   48.31    6.09
  -6   2  -5   30.75    3.83
   6  -2   5   35.32    5.28
   2   4  -5   30.15    3.76
  -4   6   5   28.82    5.21
  -6   4   5   27.80    5.06
   4  -6  -5   40.11    3.70
   4   2   5   36.38    5.88
  -2  -4   5   37.56    5.33
   4  -6  -5   34.06    3.72
  -6   2  -5   30.64    4.51
   2  -6   5   39.32    5.14
  -2  -4   5   34.03    4.75
   6  -4  -5   32.04    5.69
  -6   4   8  695.53   24.48
  -2  -4   8  724.59   22.35
   6  -2   8  656.18   22.40
  -4   6   8  786.50   26.72
   2   4  -8  732.26   21.16
  -6   2  -8  752.19   19.46
  -2   6  -8  724.84   24.57
  -2   6  -8  735.15   24.75
   4  -6  -8  740.70   17.83
   6  -4  -8  729.68   20.83
   6  -4  -8  788.22   28.49
   4   2   8  752.18   25.33
   2  -6   8  713.88   21.20
  -2  -4   8  716.78   23.22
  -2  -4   8  731.02   23.21
  -6   2  -8  684.37   22.95
   4  -6  -8  764.09   16.07
   6  -2  11  266.33   14.57
  -2  -4  11  305.44   15.01
  -4   6  11  304.91   17.18
  -6   2 -11  295.84   14.43
   2   4 -11  285.03   14.28
  -2   6 -11  302.92   16.69
   6  -4 -11  292.96   17.50
   4  -6 -11  329.07   13.02
   6  -4 -11  317.48   14.58
   4   2  11  281.65   15.16
  -2  -4  11  330.17   15.74
  -6   2 -11  330.73   16.95
   2  -6  11  341.74   14.46
  -2  -4  11  321.46   15.24
  -4  -2 -11  306.43   17.67
  -2  -4  14   53.80    6.24
  -4   6  14   49.91    6.84
   6  -2  14   49.95    6.71
  -2   6 -14   52.69    7.82
  -6   2 -14   48.99    6.48
   2   4 -14   48.71    6.23
   4  -6 -14   59.16    5.74
   6  -4 -14   54.99    6.23
   4  -6 -14   51.20    5.24
   6  -4 -14   51.92    7.39
  -4  -2 -14   56.35    7.41
   2  -6  14   63.33    6.10
  -6   2 -14   65.11    8.55
  -2  -4  14   52.55    6.10
   6  -2  17  121.75   11.60
  -2  -4  17  114.97   10.06
   2  -6  17  113.09    8.04
   2   4 -17  103.46    9.68
  -2   6 -17  106.45   10.85
  -6   2 -17  115.19   10.94
   4  -6 -17  108.22    8.39
   4  -6 -17  109.95    7.75
   6  -4 -17  118.40    9.52
   6  -4 -17  105.51   10.53
  -2  -4  17  113.00    8.56
  -6   2 -17  131.66   11.59
  -4  -2 -17  113.51   11.03
  -2  -4  20  994.83   29.63
  -2   6 -20  991.25   35.19
  -6   2 -20 1019.25   34.45
  -4  -2 -20 1222.44   38.92
   2   4 -20  972.45   31.90
  -2   6 -20  926.79   19.02
   6  -4 -20  982.89   31.53
   4  -6 -20 1014.42   23.07
   6  -4 -20 1018.12   28.88
   4  -6 -20  972.02   26.41
  -6   2 -20 1221.71   37.76
  -4  -2 -20 1102.88   35.70
  -4  -2 -20 1043.92   33.39
   4  -6 -20 1132.03   20.99
  -2  -4  20  963.61   24.24
  -2  -4  23   58.65    7.14
  -4  -2 -23   72.19    9.75
   2   4 -23   61.64    8.48
  -6   2 -23   67.27    9.18
  -2   6 -23   61.01    8.78
  -2   6 -23   65.44    5.41
   4  -6 -23   56.64    6.51
   6  -4 -23   57.30    7.08
   6  -4 -23   67.52    8.55
   4  -6 -23   58.46    5.39
  -4  -2 -23   60.57    7.97
  -2  -4  23   57.34    5.73
  -6   2 -23   76.43    9.64
  -4  -2 -23   57.98    7.71
   4  -6 -23   82.53    6.24
  -2  -4  26   17.74    4.47
  -4  -2 -26   20.70    4.49
   4   2  26   11.93    3.17
  -2  -4  26   18.23    2.70
  -6   2 -26   20.40    4.82
  -4  -2 -26   19.67    5.85
   2   4 -26   19.20    5.05
  -2   6 -26   20.01    5.58
   6  -4 -26   21.14    4.21
   2   4 -26   24.38    4.25
   4  -6 -26   21.21    4.21
   6  -4 -26   16.40    3.72
  -2   6 -26   17.82    2.87
  -4  -2 -26   14.95    4.40
   4  -6 -26   22.42    3.04
  -6   2 -26   24.36    5.45
  -2  -4  29   14.28    4.05
  -6   4  29   12.86    2.30
  -4  -2 -29   15.22    3.65
   4   2  29    6.83    2.73
  -6   2 -29    9.02    3.24
  -2   6 -29    9.40    5.09
  -4  -2 -29    6.72    3.54
   2   4 -29   11.47    3.59
   6  -4 -29   12.14    3.58
   2   4 -29    8.06    0.37
   6  -4 -29   11.92    4.08
   4  -6 -29    9.29    1.28
  -2   6 -29   14.36    2.80
  -4  -2 -29   11.47    3.83
  -6   2 -29   15.00    5.13
   4   2  32  371.71   19.67
  -6   4  32  446.96   18.18
   2   4 -32  463.72   26.46
  -4  -2 -32  407.02   24.17
  -6   2 -32  440.46   25.84
  -2   6 -32  452.12   26.59
   6  -4 -32  477.86   24.63
   4  -6 -32  444.15   20.60
   2   4 -32  441.39   19.93
  -2   6 -32  431.27   16.61
   6  -4 -32  453.74   21.45
  -4  -2 -32  544.38   23.97
  -4  -2 -32  407.20   19.72
  -6   4  35   39.12    5.25
   4   2  35   27.14    5.82
  -2   6 -35   31.76    6.99
  -4  -2 -35   29.22    6.33
  -6   2 -35   31.59    6.63
   2   4 -35   30.46    6.76
   6  -4 -35   42.55    7.20
   2   4 -35   42.37    6.76
   4  -6 -35   45.68    6.71
  -2   6 -35   45.38    5.53
  -4  -2 -35   38.83    5.72
  -4  -2 -35   58.27    7.83
   4   2  38    9.00    1.32
  -6   4  38   13.26    1.84
  -4  -2 -38    5.89    2.43
  -6   2 -38   16.46    5.56
   2   4 -38   12.89    4.99
  -2   6 -38   10.55    3.04
  -2   6 -38   17.72    4.32
   4  -6 -38   15.02    3.59
   2   4 -38   17.61    3.43
   6  -4 -38   15.82    2.97
  -4  -2 -38   12.81    3.23
   4   2  41   45.26    7.46
  -2   6 -41   49.39    9.12
  -4  -2 -41   38.41    7.11
  -6   2 -41   46.55    9.53
   2   4 -41   47.62    8.89
   2   4 -41   56.96    8.07
   6  -4 -41   49.75    7.70
   4  -6 -41   49.46    8.11
  -4  -2 -41   38.97    5.75
   4   2  44  337.06   20.92
  -2   6 -44  321.85   23.51
   2   4 -44  347.72   26.88
  -4  -2 -44  276.78   22.12
  -6   2 -44  335.94   24.86
   4  -6 -44  330.67   19.97
   2   4 -44  350.38   20.62
   6  -4 -44  324.25   20.04
  -6   2 -44  410.01   25.07
  -4  -2 -44  241.30   14.70
   4   2  47    8.63    3.78
  -6   2 -47    6.49    2.60
   2   4 -47    9.19    3.10
  -2   6 -47    8.42    3.37
  -4  -2 -47    2.88    6.82
  -4  -2 -47    8.23    1.81
   2   4 -47   12.48    4.79
  -6   2 -47   13.53    5.14
   4  -6 -47    6.80    1.58
   6  -4 -47   12.99    3.34
  -4  -2 -47    7.26    2.68
   6  -2  50   11.92    4.18
   6  -4 -50   16.86    4.82
   4  -6 -50   13.26    4.95
  -4  -2 -50   16.32    3.88
   2   4 -50   12.23    3.50
  -6   2 -50   15.87    5.16
  -2   6 -50    7.65    3.75
  -4  -2 -50    0.36    6.80
   2   4 -50   10.85    5.97
   6  -2  53   31.93    6.52
   6  -4 -53   22.72    3.92
  -6   2 -53   30.07    5.81
   4  -6 -53   27.20    5.32
  -4  -2 -53   36.76    7.64
   2   4 -53   33.22    6.59
  -6   2 -53   32.59    7.98
   2   4 -53   37.15    8.79
  -2   6 -53   32.15    7.30
   6  -2  56  110.16   12.95
  -2   6 -56   87.36   12.95
  -6   2 -56   95.25   13.82
   2   4 -56  103.30   14.97
   6  -4 -56   99.23   12.25
  -6   2 -56  112.05   12.92
   4  -6 -56   88.41   10.89
   2   4 -56  115.30   13.07
  -4  -2 -56  111.80   13.08
   2   4 -59   30.93    8.02
  -6   2 -59   29.87    8.71
  -2   6 -59   27.52    6.99
   6  -4 -59   36.93    7.54
   4  -6 -59   40.22    7.91
  -6   2 -59   44.05    8.13
  -4  -2 -59   40.46    7.70
  -6   2 -62    8.78    2.54
   2   4 -62   13.94    4.31
   6  -4 -62   23.07    5.91
   4  -6 -62   16.41    4.43
  -4  -2 -62   23.11    6.25
  -6   2 -62   22.66    5.56
  -6   2 -65    1.17    3.16
  -5   6 -62  605.75   38.37
  -6   5 -62  602.00   38.49
   1  -6 -62  577.23   31.05
  -1  -5 -62  633.03   34.19
   6  -1 -62  604.55   31.37
   5   1 -62  625.10   32.29
  -6   5 -59  190.02   21.61
  -5   6 -59  197.27   21.76
   1  -6 -59  168.34   16.85
  -1  -5 -59  190.18   18.46
   5   1 -59  186.46   17.97
   6  -1 -59  185.67   17.61
  -6   5 -56  143.07   18.54
  -5   6 -56  141.66   18.46
   1  -6 -56  113.94   13.46
   5   1 -56  138.21   15.00
  -1  -5 -56  122.67   13.88
   6  -1 -56  119.02   13.66
  -5   6 -53  111.03   15.82
   5   1 -53   95.73   13.79
  -6   5 -53  114.92   16.96
   6  -1 -53  115.01   12.64
   1  -6 -53  113.20   13.14
  -1  -5 -53  124.91   14.57
   5   1 -53  115.09   12.99
  -6   5 -50  131.34   17.07
  -5   6 -50  127.52   17.05
   5   1 -50  137.07   17.15
   5   1 -50  128.47   13.53
   1  -6 -50  122.22   12.78
  -1  -5 -50  129.55   14.15
   6  -1 -50  121.00   13.04
  -1  -5 -50  100.81    9.35
   5   1 -47  138.97   17.83
  -6   5 -47  154.60   18.29
  -5   6 -47  145.70   17.37
   5   1 -47  130.17   13.43
   1  -6 -47  118.83   12.67
  -1  -5 -47  127.90   13.99
   6  -1 -47  128.09   13.23
  -1  -5 -47  104.99    9.54
  -6   1  44  446.55   23.28
  -6   5 -44  431.10   30.09
  -5   6 -44  411.05   29.75
   5   1 -44  418.05   30.31
  -1  -5 -44  475.46   25.72
   5   1 -44  446.93   24.39
   1  -6 -44  438.81   23.32
   6  -1 -44  431.14   23.84
  -1  -5 -44  337.58   16.70
  -5  -1  41  388.46   22.72
  -6   1  41  373.46   20.97
  -6   5 -41  379.59   27.43
   5   1 -41  374.92   28.57
  -5   6 -41  346.26   26.64
   5   1 -41  380.57   22.19
  -1  -5 -41  390.69   22.99
  -6   5 -41  334.33   17.04
   6  -1 -41  365.26   21.54
   1  -6 -41  346.85   20.22
   1  -6 -41  337.64   16.49
  -1  -5 -41  274.23   14.77
   1  -6 -41  400.62   18.42
  -6   1  38   62.17    8.89
  -5  -1  38   63.67    8.37
  -5   6 -38   55.98   11.84
   5   1 -38   62.99    9.96
  -6   5 -38   63.91   10.75
  -1  -5 -38   63.33    9.44
   6  -1 -38   59.38    8.96
   5   1 -38   66.83    9.26
  -6   5 -38   54.33    6.63
   1  -6 -38   58.50    8.24
   1  -6 -38   52.59    6.06
  -1  -5 -38   50.44    6.45
  -1  -5 -38   70.27    8.16
   1  -6 -38   69.10    7.47
  -6   1  35  148.05   12.76
  -5  -1  35  156.84   14.36
   5   1 -35  163.47   17.75
  -6   5 -35  166.40   17.56
  -5   6 -35  162.05   18.19
   1  -6 -35  153.71   13.16
   5   1 -35  152.47   13.33
  -6   5 -35  140.22   10.34
   6  -1 -35  143.88   13.09
   1  -6 -35  164.49   11.86
   1  -6 -35  141.27   10.16
  -1  -5 -35  139.97   11.06
  -1  -5 -35  157.30   11.67
  -5  -1  32  278.78   17.81
  -6   1  32  261.11   16.61
  -5   6 -32  294.48   23.25
   5   1 -32  309.02   23.73
  -6   5 -32  299.48   23.68
  -6   5 -32  248.97   13.36
   5   1 -32  273.85   17.74
  -5   6 -32  269.36   13.34
   1  -6 -32  254.61   15.99
   6  -1 -32  271.67   17.49
  -1  -5 -32  267.43   15.48
  -1  -5 -32  258.78   15.58
   1  -6 -32  261.43   15.01
   1  -6 -32  269.02   14.71
  -6   1  29  475.74   22.26
  -5  -1  29  475.59   23.08
  -6   5 -29  498.24   28.71
   5   1 -29  519.95   29.22
  -5   6 -29  514.92   29.04
   5   1 -29  495.96   23.12
   1  -6 -29  461.52   20.99
  -5   6 -29  504.18   17.27
   6  -1 -29  501.78   23.52
   6  -1 -29  494.95   27.27
  -1  -5 -29  484.46   20.76
   1  -6 -29  485.43   19.78
   1  -6 -29  485.55   20.39
  -1  -5 -29  469.80   21.39
  -5  -1  26  468.15   22.31
  -5   6 -26  473.61   27.42
  -6   5 -26  479.04   27.18
   5   1 -26  468.82   26.80
   6  -1 -26  459.77   25.48
  -5   6 -26  507.59   16.15
   1  -6 -26  494.81   21.21
   5   1 -26  490.71   22.68
   6  -1 -26  507.99   23.55
   1  -6 -26  500.31   20.63
   1  -6 -26  549.47   22.46
  -1  -5 -26  488.08   20.64
  -1  -5 -26  512.19   23.68
  -5  -1  23  645.42   25.72
  -6   5 -23  660.04   30.23
  -5   6 -23  649.96   30.49
   5   1 -23  684.71   31.25
   5   1 -23  705.82   30.47
   5   1 -23  733.01   27.94
  -5   6 -23  727.02   17.70
   6  -1 -23  716.85   27.33
   6  -1 -23  648.76   28.62
   1  -6 -23  704.39   24.41
  -6   1  23  703.99   20.57
  -1  -5 -23  662.07   23.98
  -5   6 -20  532.95   26.46
   5   1 -20  524.42   25.82
  -6   5 -20  536.63   26.22
   5   1 -20  539.74   25.96
   6  -1 -20  547.43   23.39
   6  -1 -20  482.37   24.46
  -5   6 -20  574.52   14.13
   1  -6 -20  551.21   21.37
  -1  -5 -20  523.30   21.28
  -6   1  20  568.98   18.45
  -5  -1  20  513.42   19.46
   5   1 -17  224.76   15.55
  -6   5 -17  219.68   16.12
  -5   6 -17  223.53   16.32
   1   5  17  232.11    5.92
   5   1 -17  215.35   15.60
   6  -1 -17  220.20   14.66
  -5   6 -17  209.81    7.41
   6  -1 -17  205.19   15.65
  -6   1  17  224.72   11.64
  -1  -5 -17  204.04   13.21
  -5  -1  17  203.44   12.00
   1  -6 -17  219.26   13.48
  -1   6  14 4000.33   57.24
   1   5  14 3826.56   47.82
  -6   5 -14 3894.06   63.46
  -5   6 -14 3846.94   64.63
   5   1 -14 3707.22   63.56
   6  -1 -14 3747.82   65.29
  -1  -5 -14 3879.67   57.88
  -5  -1  14 3899.34   53.65
   1  -6 -14 4000.46   56.96
  -1   6  11  936.69   26.58
   1   5  11  883.99   21.72
  -6   5 -11  911.60   28.71
  -5   6 -11  904.12   29.77
   5   1 -11  911.98   30.89
   6  -1 -11  922.98   32.65
  -1  -5 -11  936.15   28.31
   1  -6 -11  937.37   27.44
  -5  -1  11  973.43   27.30
  -1   6   8  668.08   21.63
  -6   5  -8  634.30   23.42
  -5   6  -8  636.93   24.39
   1   5   8  659.47   18.03
   6  -1  -8  654.21   27.98
   5   1  -8  634.87   25.89
  -1  -5  -8  645.32   23.47
   1  -6  -8  665.83   22.84
   1   5   5  347.05   12.95
  -6   5  -5  335.98   16.42
  -1   6   5  349.36   15.44
  -5   6  -5  340.18   17.08
   6  -1  -5  352.82   20.56
   5   1  -5  329.10   18.89
   1  -6  -5  342.86   15.01
  -1  -5  -5  368.67   17.60
   1  -6  -5  381.68   17.20
  -6   5  -2  355.47   16.78
  -1   6   2  386.42   16.09
  -5   6  -2  366.77   17.71
   1   5   2  380.43   13.60
  -6   1   2  389.02   13.04
   6  -1  -2  396.16   21.65
   5   1  -2  382.05   20.64
   1  -6  -2  385.23   16.97
  -1  -5  -2  395.35   17.46
  -1  -5  -2  394.00   18.07
   1  -6  -2  361.12   15.28
  -6   5   1  792.41   24.60
  -5   6   1  806.83   25.67
  -6   1  -1  814.25   16.48
  -1  -5   1  757.23   19.91
  -1   6  -1  811.02   23.77
   1   5  -1  782.29   19.17
   1   5  -1  778.14   19.94
   5   1   1  832.21   29.68
   5  -6  -1  775.53   15.30
   6  -1   1  866.31   31.48
   1  -6   1  764.84   23.44
  -1  -5   1  815.18   25.53
  -1  -5   1  793.33   24.37
   1  -6   1  767.11   22.64
  -1   6  -4 2437.61   42.24
  -1  -5   4 2314.04   36.15
  -6   5   4 2417.44   44.10
  -6   1  -4 2436.39   28.37
  -5   6   4 2445.20   45.48
   6  -1   4 2606.22   53.92
   1   5  -4 2367.19   36.12
   6  -5  -4 2406.48   34.30
   5   1   4 2395.40   50.04
   6  -1   4 2428.40   50.45
   5  -6  -4 2418.67   30.01
   1  -6   4 2444.37   40.83
  -1  -5   4 2517.39   44.38
  -1  -5   4 2377.70   41.86
  -1  -5   7 1309.26   28.31
  -6   5   7 1357.90   34.75
  -5   6   7 1314.64   36.03
   1   5  -7 1274.66   29.12
  -1   6  -7 1306.95   31.85
  -1   6  -7 1303.76   31.38
   6  -5  -7 1321.65   26.39
   5   1   7 1343.81   36.26
   5  -6  -7 1449.50   25.73
   1  -6   7 1364.37   29.99
  -1  -5   7 1430.60   32.94
  -6   1  -7 1239.77   33.45
  -1  -5   7 1369.43   32.66
   6  -1  10  141.83   11.89
  -6   5  10  149.57   12.18
  -1  -5  10  153.50   10.16
  -5   6  10  144.65   12.63
  -5  -1 -10  155.72    6.83
   1   5 -10  154.19   11.24
  -6   1 -10  164.32    9.98
  -1   6 -10  153.74   11.53
   5   1  10  155.36   12.11
   6  -5 -10  164.07   10.00
   5  -6 -10  175.72    9.82
   6  -5 -10  159.68   12.54
   1  -6  10  165.27   10.12
  -1  -5  10  165.99   11.07
  -6   1 -10  149.41   12.13
  -1  -5  13  110.53    9.32
   6  -1  13   91.80    9.17
  -5   6  13  120.94   11.40
  -1   6 -13  120.48   10.79
  -6   1 -13  122.84    9.48
   1   5 -13  124.58   10.89
  -5  -1 -13  115.09    7.18
   5  -6 -13  122.12    8.56
   6  -5 -13  115.93   10.66
   5  -6 -13  123.68    9.53
   6  -5 -13  115.55    8.73
  -6   1 -13   95.45    9.24
  -1  -5  13  113.48    8.74
   1  -6  13  124.51    8.72
   6  -1  16  274.38   15.26
  -1  -5  16  362.12   16.96
   5   1  16  392.83   23.83
  -5  -1 -16  312.61   13.62
  -6   1 -16  355.23   17.78
  -1   6 -16  320.25   18.50
   1   5 -16  396.50   21.61
   6  -5 -16  325.22   17.76
   5  -6 -16  326.54   15.47
   6  -5 -16  381.76   16.71
   5  -6 -16  368.16   15.55
   1  -6  16  377.06   14.76
  -5  -1 -16  362.18   19.99
  -6   1 -16  348.09   18.12
  -1  -5  16  364.61   15.06
  -1  -5  19  610.88   22.51
   6  -1  19  506.99   21.87
   5   1  19  548.93   24.53
  -5  -1 -19  535.99   19.50
  -1   6 -19  610.80   27.07
  -6   1 -19  676.01   26.73
   1   5 -19  727.17   30.28
   5  -6 -19  586.12   20.26
   6  -5 -19  625.97   24.71
   5  -6 -19  637.09   21.71
   6  -5 -19  617.82   21.89
   5  -6 -19  659.19   10.85
  -6   1 -19  518.90   21.73
  -5  -1 -19  588.61   24.94
   1  -6  19  619.33   18.73
  -1  -5  19  588.56   18.23
   6  -1  22 1482.70   38.76
   5   1  22 1351.08   36.62
  -1  -5  22 1664.44   38.80
  -1   6 -22 1680.08   46.37
  -5  -1 -22 1424.12   34.34
  -6   1 -22 1725.95   43.32
   1   5 -22 2028.77   52.48
   5  -6 -22 1577.38   34.65
   6  -5 -22 1688.37   40.63
   6  -5 -22 1666.77   37.30
   5  -6 -22 1705.99   35.49
  -6   1 -22 1337.85   34.42
  -5  -1 -22 1508.95   39.60
  -5  -1 -22 1493.02   36.86
   1  -6  22 1700.55   30.06
  -1  -5  22 1503.00   27.87
   5   1  25  372.13   18.99
  -5   6  25  496.09   12.84
   6  -1  25  433.55   22.03
  -1   6 -25  537.44   27.79
  -5  -1 -25  409.70   19.80
  -6   1 -25  475.77   23.68
   1   5 -25  570.03   28.90
   5  -6 -25  493.32   18.72
   6  -5 -25  500.97   22.47
   1   5 -25  505.84   19.78
  -1   6 -25  458.39   16.09
   6  -5 -25  535.39   22.11
   5  -6 -25  494.37   20.14
   1  -6  25  531.96   16.24
  -5  -1 -25  446.96   20.09
  -1  -5  25  464.21   14.60
  -5  -1 -25  478.80   22.35
  -6   1 -25  410.42   18.90
  -6   5  28  582.81   18.86
   6  -1  28  549.98   25.54
   5   1  28  491.04   22.37
  -1   6 -28  603.90   29.38
   1   5 -28  684.62   32.81
  -6   1 -28  592.89   27.52
  -5  -1 -28  493.84   23.01
   5  -6 -28  552.99   21.93
   5  -6 -28  558.63   20.07
   6  -5 -28  594.61   25.08
  -1   6 -28  526.72   17.87
   1   5 -28  570.68   21.01
   6  -5 -28  595.24   23.62
  -5  -1 -28  517.14   21.62
  -5  -1 -28  494.99   22.12
  -6   1 -28  456.99   20.24
  -6   5  31   74.89    6.82
   6  -1  31   67.22    8.60
   5   1  31   71.88    8.92
   1   5 -31   90.79   12.22
  -6   1 -31   70.30   10.08
  -1   6 -31   75.15   10.13
  -5  -1 -31   67.58    8.25
   6  -5 -31   72.83    8.85
   5  -6 -31   65.53    8.01
   1   5 -31   64.22    7.36
  -1   6 -31   65.75    6.64
   6  -5 -31   79.64    9.32
  -5  -1 -31   64.25    7.37
  -5  -1 -31   64.21    7.86
  -6   1 -31   57.31    7.59
   6  -1  34 1303.30   41.32
   5   1  34 1134.91   35.79
  -6   1 -34 1204.11   41.45
  -1   6 -34 1207.23   42.65
   1   5 -34 1512.53   51.86
  -5  -1 -34 1066.14   36.86
   5  -6 -34 1277.86   35.56
   6  -5 -34 1321.06   37.42
   1   5 -34 1228.85   32.58
  -1   6 -34 1210.51   29.63
  -6   1 -34 1081.66   32.23
  -5  -1 -34 1197.41   31.43
  -5  -1 -34  995.23   29.57
  -6   1 -34 1247.48   30.89
   6  -1  37  555.79   27.64
   5   1  37  488.75   24.34
  -5  -1 -37  439.14   24.42
   1   5 -37  631.27   34.19
  -6   1 -37  491.87   27.29
  -1   6 -37  508.73   28.30
   5  -6 -37  532.34   23.79
   1   5 -37  528.27   22.07
   6  -5 -37  546.57   24.68
  -1   6 -37  523.24   20.58
  -6   1 -37  460.33   21.34
  -5  -1 -37  513.23   20.30
  -5  -1 -37  393.05   18.82
   6  -1  40   84.29   11.33
   5   1  40   80.67   10.32
   1   5 -40   81.00   12.90
  -6   1 -40   68.16   10.29
  -5  -1 -40   72.73    9.90
  -1   6 -40   73.18   10.87
   1   5 -40   93.13    9.33
  -1   6 -40   97.19    8.98
   5  -6 -40   96.59   10.48
   6  -5 -40   98.47   10.63
  -5  -1 -40   74.51    8.06
   5   1  43  255.20   18.72
   6  -1  43  249.87   19.14
  -1   6 -43  235.43   19.91
   1   5 -43  254.48   22.16
  -5  -1 -43  201.39   17.82
  -6   1 -43  233.57   19.47
   5  -6 -43  244.58   16.88
   1   5 -43  258.80   16.79
   6  -5 -43  247.93   17.54
  -5  -1 -43  177.68   12.86
   6  -1  46   16.41    4.80
   5   1  46   17.79    5.51
  -6   1 -46   15.78    5.76
   1   5 -46   18.31    4.90
  -5  -1 -46   16.41    5.46
  -1   6 -46   12.86    5.08
  -6   1 -46   25.39    5.66
   6  -5 -46   27.82    5.38
   1   5 -46   25.78    5.45
   5  -6 -46   19.36    4.05
  -5  -1 -46   20.79    4.51
   6  -1  49   79.25   11.06
   5   1  49   98.57   12.27
   1   5 -49   77.45    9.65
   6  -5 -49   83.80   10.74
  -5  -1 -49   78.40   10.21
  -6   1 -49   78.30   10.19
   5  -6 -49   79.25   10.09
  -6   1 -49   69.63   11.16
  -1   6 -49   79.11   11.53
  -5  -1 -49   66.75   11.19
   1   5 -49   74.90   10.68
   6  -1  52  378.30   25.15
  -5  -1 -52  315.87   21.25
  -6   1 -52  320.19   21.34
   6  -5 -52  330.75   21.69
   5  -6 -52  314.02   20.80
  -6   1 -52  301.25   23.69
  -1   6 -52  283.60   23.25
   1   5 -52  308.46   24.64
   6  -1  55  314.35   23.25
  -1   6 -55  222.59   20.37
   1   5 -55  241.60   21.82
  -6   1 -55  235.88   21.85
  -5  -1 -55  263.52   19.66
  -6   1 -55  275.96   19.96
   6  -5 -55  284.24   20.30
   5  -6 -55  282.47   20.00
  -6   1 -58   22.27    8.06
   1   5 -58   26.99    7.27
  -1   6 -58   20.00    6.97
   6  -5 -58   31.60    6.72
   5  -6 -58   30.23    6.44
  -6   1 -58   29.70    6.78
  -5  -1 -58   22.20    5.82
  -1   6 -61   25.68    7.85
   1   5 -61   26.75    6.50
   5  -6 -61   33.78    7.26
   6  -5 -61   28.71    7.30
  -6   1 -61   26.74    5.94
  -5  -1 -61   28.02    7.06
  -5  -1 -64   44.81    8.51
  -6   1 -64   37.62    7.68
   6   0 -63   -2.47    3.20
  -6   6 -60   59.76   11.79
   0  -6 -60   90.94   11.84
   6   0 -60   88.78   12.13
  -6   6 -57    0.28    4.02
   6   0 -57    1.35    1.39
   0  -6 -57   -0.97    4.39
  -6   6 -54  102.75   15.74
   6   0 -54  123.75   13.81
   0  -6 -54  124.08   13.84
  -6   6 -51   -1.40    1.95
   0  -6 -51    1.20    1.86
   6   0 -51    3.29    1.65
  -6   6 -48 1974.78   65.60
   0  -6 -48 1820.22   50.82
   6   0 -48 1846.08   51.31
  -6   0  45    4.30    4.09
  -6   6 -45   -1.74    2.28
   6   0 -45    4.46    4.39
   0  -6 -45    1.99    3.56
   0  -6 -45    2.63    1.39
  -6   0  42  674.57   29.68
  -6   6 -42  736.12   39.42
   6   0 -42  652.01   29.35
   0  -6 -42  643.08   28.92
  -6   0  39   -1.54    0.72
   0  -6 -39    0.88    1.40
  -6   6 -39    2.49    3.61
   6   0 -39    2.88    2.40
   0  -6 -39    3.33    2.66
   0  -6 -39   -0.93    2.13
  -6   0  36  466.14   23.53
   6   0 -36  478.69   24.38
   0  -6 -36  450.81   23.08
   0  -6 -36  436.50   19.89
   0  -6 -36  470.13   20.76
   0  -6 -33    1.43    0.42
  -6   0  33    3.23    2.27
  -6   6 -33    2.42    2.85
   0  -6 -33   -1.15    2.75
   6   0 -33    0.52    0.55
  -6   6 -33    1.54    1.04
   0  -6 -33   -0.18    1.83
  -6   0  30  439.01   22.38
  -6   6 -30  406.16   26.78
  -6   6 -30  438.58   15.99
   6   0 -30  454.34   22.90
   0  -6 -30  464.00   20.43
   0  -6 -30  429.00   20.34
  -6   0  27   -0.14    2.17
   0  -6 -27    0.56    0.84
  -6   6 -27    0.93    1.14
   6   0 -27    5.51    3.35
  -6   6 -27    1.02    0.56
   6   0 -27    2.67    2.56
   0  -6 -27    1.31    1.36
  -6   6 -24  752.17   33.12
   6   0 -24  708.09   31.33
   6   0 -24  798.75   29.84
  -6   0  24  719.56   22.83
   0  -6 -24  719.62   25.44
   0  -6 -21    0.06    1.18
  -6   6 -21    2.72    1.46
   6   0 -21    3.31    2.50
   6   0 -21    2.34    1.83
  -6   0  21    4.42    2.19
   0   6  18 1677.78   36.02
  -6   6 -18 1768.63   47.28
   6   0 -18 1645.12   44.87
   0  -6 -18 1742.97   39.93
  -6   0  18 1810.07   36.04
   0  -6 -15   -0.93    2.26
   6   0 -15    1.17    1.35
  -6   0  15    0.61    0.51
   0  -6 -12  671.25   13.95
   0   6  12  585.00   20.01
  -6   6 -12  587.35   24.54
   6   0 -12  548.85   25.95
   0  -6 -12  643.35   24.11
   0   6   9    3.67    1.66
  -6   6  -9    2.15    0.23
   0  -6  -9    3.70    1.19
   0  -6  -9    3.02    1.88
   6   0  -9    2.16    1.92
   0  -6  -6 1836.53   26.38
   0   6   6 1835.11   33.80
  -6   6  -6 1780.11   40.16
   6   0  -6 1755.51   46.43
   0  -6  -6 1856.90   40.37
  -6   6  -3    4.04    0.68
   0   6   3    1.91    0.67
   0  -6  -3    2.25    2.01
   0  -6  -3    2.96    2.25
   0  -6  -3    3.59    1.58
   6   0  -3    5.59    1.76
   0  -6   0 9596.33   68.53
   0   6   0 9628.90   78.87
  -6   6   0 9308.44   88.70
  -6   0   0 9275.63   49.60
   6   0   0 9655.58  106.83
   0  -6   0 9999.00   92.03
   0  -6   0 9064.82   82.57
   0  -6   3    4.03    3.23
   0  -6   3    2.29    2.63
  -6   0  -3    3.98    0.82
  -6   6   3    3.38    1.69
   0   6  -3    2.47    1.47
   6  -6  -3    5.62    2.32
   0  -6   3    6.93    2.62
   6   0   3    0.85    1.05
  -6   6   6 1738.43   41.16
   0  -6   6 1676.03   32.00
   0   6  -6 1700.14   34.63
  -6   0  -6 1740.06   24.13
   6   0   6 1811.55   44.36
   6  -6  -6 1689.64   28.36
   0  -6   6 1727.74   37.52
   0  -6   6 1728.22   37.09
   0  -6   9    1.81    0.71
   0  -6   9    1.18    1.35
  -6   6   9    2.77    1.01
  -6   0  -9    5.73    1.15
   0   6  -9    4.32    1.58
   6  -6  -9    3.68    0.84
   6  -6  -9    3.69    0.87
   6   0   9    2.87    0.85
   0  -6  12  587.67   20.45
   6   0  12  685.81   31.24
  -6   6  12  564.66   24.59
  -6   0 -12  680.81   20.15
   0   6 -12  557.02   22.39
   6  -6 -12  614.78   19.83
   6  -6 -12  585.25   23.20
   0  -6  12  598.51   20.38
  -6   0 -12  548.06   24.43
   6   0  15    0.75    2.40
   0  -6  15    1.65    1.03
  -6   0 -15    0.15    1.83
   0   6 -15    5.26    2.57
   6  -6 -15    3.85    1.27
  -6   0 -15    0.78    1.90
   6  -6 -15    0.72    1.06
  -6   0 -18 1175.83   29.72
   0   6 -18 1240.73   37.65
   6  -6 -18 1229.62   33.56
   6  -6 -18 1313.15   31.81
   0  -6  18 1180.35   26.66
  -6   0 -18 1104.60   34.04
   6   0  21   -0.46    2.48
   0  -6  21    2.62    1.33
   0   6 -21    0.62    2.35
  -6   0 -21    1.47    1.55
   6  -6 -21    0.85    2.02
  -6   0 -21   -0.88    1.83
   6  -6 -21    5.16    2.84
   6   0  24  751.63   27.46
   0   6 -24  987.40   36.77
  -6   0 -24  852.59   28.72
   6  -6 -24  957.86   29.81
   6  -6 -24  974.36   29.07
  -6   0 -24  791.70   28.60
   0  -6  24  937.02   22.35
   6   0  27    2.16    1.01
   0   6 -27    1.32    2.97
  -6   0 -27    1.70    1.26
   6  -6 -27    2.68    2.49
   6  -6 -27    1.71    1.06
  -6   0 -27    0.13    1.86
   6   0  30  584.83   25.97
  -6   0 -30  616.41   26.43
   0   6 -30  707.10   31.91
   6  -6 -30  731.87   26.43
   0   6 -30  641.74   21.61
   6  -6 -30  772.08   27.41
  -6   0 -30  567.78   22.61
  -6   0 -30  672.12   24.60
  -6   0 -33    0.80    1.44
   6   0  33    2.76    1.27
   0   6 -33   -0.20    1.25
  -6   0 -33   -0.38    2.34
   6  -6 -33    1.94    1.05
   0   6 -33    0.68    1.53
  -6   0 -33    5.64    1.70
   6   0  36  336.99   21.14
  -6   0 -36  280.50   19.45
   0   6 -36  346.82   23.64
   0   6 -36  314.88   16.06
   6  -6 -36  326.16   19.10
  -6   0 -36  313.73   16.15
   6   0  39    2.17    2.35
  -6   0 -39   -0.87    1.74
   0   6 -39    0.03    2.08
   6  -6 -39   -0.53    2.20
   0   6 -39    1.90    0.85
  -6   0 -39    1.99    1.01
   6   0  42  949.71   36.75
   0   6 -42  865.18   38.36
   6  -6 -42  856.33   32.49
   6   0  45    0.29    3.59
   6  -6 -45    0.03    1.73
   0   6 -45    1.59    2.52
  -6   0 -45    5.77    3.84
  -6   0 -48 1507.69   42.86
  -6   0 -48 1569.96   51.31
   0   6 -48 1644.91   53.85
   6   0  51   -1.51    3.68
   0   6 -51   -0.22    2.10
   6  -6 -51   -2.42    4.53
  -6   0 -51    1.98    1.95
   0   6 -54  139.18   16.04
  -6   0 -54  152.83   13.69
   6  -6 -54  183.75   16.00
   0   6 -57   -3.24    3.97
   6  -6 -57   -1.06    3.23
  -6   0 -57   -0.75    2.15
   0   6 -60   17.66    5.34
   6  -6 -60   37.92    8.20
  -6   0 -60   33.33    6.52
  -6   0 -63    0.58    3.04
  -7   4 -65  114.74   17.11
   4   3 -65  139.64   14.87
  -7   4 -62    7.91    3.17
   4   3 -62    3.04    5.55
   4   3 -62    6.08    3.42
  -7   4 -59   67.47   12.62
  -4   7 -59   66.44   11.99
   4   3 -59   64.60   13.10
   3  -7 -59   83.69   11.55
  -3  -4 -59   87.13   12.69
   7  -3 -59   89.63   11.88
   4   3 -59   91.33   12.09
  -4   7 -56    6.46    5.54
   4   3 -56    8.52    6.13
  -7   4 -56    5.50    3.11
   4   3 -56    4.58    3.80
   3  -7 -56   10.00    3.45
  -3  -4 -56    9.09    3.52
   7  -3 -56   13.73    4.79
  -4   7 -53   47.39   10.02
   4   3 -53   45.39   10.27
  -7   4 -53   51.19   10.69
   3  -7 -53   56.90    8.40
   4   3 -53   63.55    9.27
  -3  -4 -53   70.54   11.22
   7  -3 -53   55.55    8.63
  -3  -4 -53   36.72    5.15
   4   3 -50   41.72   10.54
  -7   4 -50   40.45    9.75
  -4   7 -50   30.11    7.38
   3  -7 -50   42.01    7.60
   4   3 -50   44.98    8.07
  -3  -4 -50   63.23   10.37
   7  -3 -50   42.41    7.63
  -3  -4 -50   33.46    5.26
  -7   4 -47  360.24   27.15
   4   3 -47  379.14   28.07
  -4   7 -47  381.56   27.74
   3  -7 -47  357.33   21.36
   4   3 -47  391.01   23.15
  -7   4 -47  394.97   22.28
  -3  -4 -47  427.74   27.44
   7  -3 -47  382.89   22.63
  -7   3  44  281.39   17.17
   4   3 -44  277.50   22.90
  -4   7 -44  260.70   22.61
  -7   4 -44  272.17   23.78
   4   3 -44  286.75   19.02
   3  -7 -44  272.54   18.37
  -7   4 -44  306.79   19.16
   7  -3 -44  284.29   19.23
  -3  -4 -44  322.11   23.16
  -3  -4 -44  212.75   13.80
  -7   3  41    8.83    3.96
  -7   4 -41    7.23    3.40
   4   3 -41    9.19    4.63
  -7   4 -41   11.31    3.46
   4   3 -41    6.43    3.50
   3  -7 -41   11.52    5.10
   7  -3 -41   11.56    4.32
  -3  -4 -41    5.35    2.52
  -7   3  38  318.22   17.88
  -4  -3  38  368.84   22.68
  -4   7 -38  359.08   25.64
  -7   4 -38  329.55   25.14
   4   3 -38  337.04   23.95
   3  -7 -38  314.52   18.74
   7  -3 -38  312.93   19.55
   4   3 -38  322.27   19.36
  -3  -4 -38  378.71   20.19
  -3  -4 -38  286.92   16.74
  -3  -4 -35   12.66    3.47
  -7   3  35   11.77    3.31
  -4  -3  35   14.76    4.85
  -7   4 -35   11.64    4.08
   4   3 -35   13.42    2.76
  -4   7 -35   13.31    4.26
   4   3 -35   10.42    1.29
   3  -7 -35   13.73    4.13
   7  -3 -35   13.26    4.01
  -3  -4 -35   12.93    3.46
   3  -7 -32  146.66   11.52
  -7   3  32  142.15   11.63
  -4  -3  32  153.93   14.26
  -4   7 -32  160.53   17.26
   4   3 -32  151.48   15.43
  -7   4 -32  161.10   17.07
   7  -3 -32  146.82   15.03
   3  -7 -32  142.32   11.84
   4   3 -32  142.99   12.33
   7  -3 -32  136.18   12.46
  -3  -4 -32  137.87   12.55
  -3  -4 -32  150.66   13.06
  -4  -3  29 1120.43   37.04
   3  -7 -29 1189.01   32.22
  -4   7 -29 1079.04   42.18
  -7   4 -29 1068.27   41.58
   4   3 -29 1043.06   37.71
   7  -3 -29 1043.75   38.48
   4   3 -29 1065.03   34.14
   3  -7 -29 1058.80   31.77
   7  -3 -29 1055.54   33.85
  -3  -4 -29 1210.71   36.24
  -3  -4 -29 1047.84   34.42
   3  -7 -29 1135.14   27.27
  -4  -3  29  952.55   26.59
  -3  -4 -26   14.29    4.51
   3  -7 -26   10.73    3.16
  -4  -3  26   10.00    1.54
   4   3 -26    4.75    3.19
  -4   7 -26    7.88    3.89
  -7   4 -26    9.29    4.28
   7  -3 -26    8.92    2.88
   3  -7 -26   11.25    3.15
   7  -3 -26    8.21    3.46
   3  -7 -26   10.09    2.69
  -3  -4 -26    7.11    1.30
  -4  -3  23  262.97   16.89
  -4   7 -23  246.56   19.21
  -7   4 -23  248.67   18.44
   4   3 -23  257.38   16.86
   3   4  23  252.37   12.77
   7  -3 -23  258.17   16.21
   3  -7 -23  259.86   14.36
   7  -3 -23  243.49   17.78
  -4   7 -23  221.49    8.01
  -7   3  23  263.84   10.28
  -3  -4 -23  283.22   17.75
   3  -7 -23  283.56   15.62
  -4  -3  20  132.67   12.12
  -4   7 -20  126.62   13.13
  -7   4 -20  132.80   12.73
   4   3 -20  130.05   11.39
   7  -3 -20  142.95   11.84
  -4   7 -20  131.68    5.36
   7  -3 -20  127.25   12.37
   3  -7 -20  147.74   10.74
   3   4  20  133.01    9.26
  -3  -4 -20  154.46   13.31
   3  -7 -20  167.01   11.96
  -4  -3  17  569.41   23.80
  -3   7  17  598.72   25.11
  -4   7 -17  603.87   27.22
  -7   4 -17  585.04   25.17
   4   3 -17  665.72   24.26
   3  -7 -17  605.55   10.87
   3   4  17  674.19   20.63
   7  -3 -17  622.38   23.88
   3  -7 -17  617.16   20.72
   7  -3 -17  605.61   27.13
  -3  -4 -17  628.13   26.84
  -4  -3  17  590.63   22.15
   3  -7 -17  640.47   23.36
  -3  -4 -14   12.44    3.16
   3  -7 -14   14.35    3.39
  -7   4 -14   13.57    4.26
  -4   7 -14   10.34    2.68
   4   3 -14   10.31    2.01
  -3   7  14   10.39    3.88
   3   4  14    7.52    1.70
   3  -7 -14   11.10    3.10
   4   3 -14    8.03    3.01
  -4  -3  14   13.73    2.97
   7  -3 -14    7.61    2.79
   3   4  14    8.10    2.63
   3  -7 -14    9.11    1.62
  -3   7  11  584.15   24.06
   3   4  11  546.40   13.04
   4   3 -11  568.91   19.23
  -7   4 -11  544.30   21.14
  -4   7 -11  553.10   24.25
  -4   7 -11  547.76   23.82
   4   3 -11  554.06   23.83
   7  -3 -11  533.31   26.50
   3  -7 -11  582.14   17.85
   3   4  11  594.49   19.45
  -3  -4 -11  606.40   25.68
   3  -7 -11  596.15   22.19
  -4  -3  11  555.01   21.35
  -7   4 -11  600.03   21.74
  -4   7  -8   66.54    8.31
   3   4   8   67.10    4.27
  -3   7   8   60.72    7.26
  -7   4  -8   68.55    7.32
   4   3  -8   72.58    6.16
   3   4   8   73.81    6.70
   4   3  -8   61.94    7.51
   7  -3  -8   64.64    9.55
   3  -7  -8   65.20    5.61
  -3  -4  -8   63.75    8.32
  -7   4  -8   69.48    7.00
  -4  -3   8   64.48    7.66
   3  -7  -8   65.26    7.27
   3  -7  -8   59.23    5.46
  -7   3   5  272.00   14.02
  -3   7   5  291.07   16.09
  -7   4  -5  277.17   14.29
   3   4   5  282.55    8.67
  -4   7  -5  290.29   16.81
   7  -3  -5  335.40   17.74
   4   3  -5  294.31   10.78
   3   4   5  275.53    7.62
   4   3  -5  280.14   15.74
   3   4   5  286.00   13.65
   7  -3  -5  287.54   19.09
   3  -7  -5  327.80   11.64
  -7   4  -5  340.92   15.25
  -3  -4  -5  318.34   18.32
  -7   3   5  273.92   12.43
  -4  -3   5  307.42   16.67
   3  -7  -5  337.26   16.36
   3  -7  -5  290.33   13.17
   7  -4   2  711.01   24.76
  -7   4  -2  604.62   20.46
  -4   7  -2  623.95   23.70
  -7   3   2  605.01   19.68
   7  -3  -2  819.72   30.14
  -3   7   2  628.10   23.17
   4   3  -2  640.15   12.83
   7  -3  -2  637.29   27.62
   3   4   2  629.26   20.39
   4   3  -2  626.49   23.25
   4  -7   2  632.36   10.20
   3  -7  -2  696.02   15.38
  -7   3   2  554.76   18.09
  -4  -3   2  716.44   30.57
   3  -7  -2  658.08   22.53
  -7   4  -2  663.90   20.38
   3  -7  -2  618.94   19.09
  -3  -4  -2  633.89   25.77
  -7   4   1 1960.06   37.18
   7  -4  -1 2098.41   39.61
  -7   3  -1 1947.36   33.73
  -4   7   1 1972.00   42.18
  -3   7  -1 2001.01   41.75
   4  -7  -1 2153.59   24.05
   3   4  -1 2055.78   37.87
   4   3   1 2100.32   42.18
  -4  -3  -1 2470.20   57.66
  -7   3  -1 2034.22   37.83
  -7   4   1 2238.75   34.59
   3  -7   1 2093.36   40.26
  -3  -4   1 2053.35   45.55
  -3   7  -4  817.48   27.27
   7  -3   4  762.56   25.00
  -7   4   4  798.16   25.28
  -7   3  -4  830.83   22.25
  -4   7   4  827.63   27.54
   3   4  -4  735.20   16.86
   3   4  -4  846.17   25.67
   4   3   4  842.61   27.14
   7  -4  -4  844.36   31.77
   4  -7  -4  837.34   17.33
   4  -7  -4  829.63   20.38
  -3  -4   4  804.89   28.32
  -3  -4   4  819.18   26.79
   3  -7   4  832.42   24.83
  -4  -3  -4  991.67   37.01
  -7   4   4  865.21   19.86
  -7   3  -4  895.63   27.44
  -7   3  -7   41.33    5.26
  -3   7  -7   46.43    6.92
  -4  -3  -7   42.09    7.62
   7  -4  -7   59.96    7.75
  -7   4   7   39.03    6.14
  -4   7   7   41.20    6.27
   3  -7   7   39.62    5.46
   7  -3   7   38.33    5.44
   3   4  -7   39.83    4.62
   3   4  -7   47.31    6.42
   4  -7  -7   44.22    4.37
   7  -4  -7   43.39    7.72
   4   3   7   42.21    6.27
   4  -7  -7   48.56    4.65
  -3  -4   7   40.65    5.92
  -7   4   7   41.66    3.94
  -3  -4   7   41.43    6.34
  -7   3  -7   42.21    6.88
   4   3  10  342.97    7.01
  -4   7  10  392.64   20.38
   3  -7  10  383.45   16.63
   7  -3  10  339.66   17.57
   7  -4 -10  471.89   19.25
  -3   7 -10  366.30   19.05
   3   4 -10  341.96   14.23
  -7   3 -10  366.73   15.63
  -3   7 -10  363.79   19.06
   4   3  10  391.36   18.40
   4  -7 -10  375.06   13.76
   7  -4 -10  354.22   16.42
   7  -4 -10  349.54   20.71
  -4  -3 -10  465.72   26.29
  -3  -4  10  339.17   17.85
  -7   3 -10  465.01   22.50
  -3  -4  10  361.87   17.43
  -7   4  10  424.01   11.78
  -4  -3 -13   41.63    8.06
  -3  -4  13   32.87    5.19
  -3  -4  13   31.18    5.83
   4   3  13   33.40    2.81
   7  -3  13   37.92    6.91
  -4   7  13   36.46    6.19
   3   4 -13   36.36    5.04
  -7   3 -13   36.35    5.59
  -3   7 -13   34.02    5.71
   4  -7 -13   40.26    4.58
   4   3  13   39.55    5.91
   4  -7 -13   39.95    5.00
   7  -4 -13   34.94    5.36
  -7   4  13   41.84    3.27
  -7   3 -13   49.68    7.34
   7  -4 -13   33.78    6.22
  -3  -4  13   37.15    5.78
  -4   7  16  209.76   15.72
  -3  -4  16  220.19   14.41
   3   4 -16  216.69   13.38
  -3   7 -16  215.36   16.07
  -7   3 -16  222.90   14.84
   7  -4 -16  212.87   16.52
   4  -7 -16  231.57   10.59
   4  -7 -16  215.81   11.82
   7  -4 -16  217.06   13.41
   4   3  16  233.95   13.63
  -7   3 -16  261.54   17.34
  -3  -4  16  217.84   13.78
  -4  -3 -16  273.34   19.58
  -3  -4  16  220.97   13.82
  -3  -4  19 1273.79   35.35
   3   4 -19 1239.27   34.28
  -3   7 -19 1280.88   40.24
  -7   3 -19 1239.54   37.52
   4  -7 -19 1308.45   30.74
   4   3  19 1220.58   30.88
   4  -7 -19 1311.90   24.09
   7  -4 -19 1335.43   34.33
   7  -4 -19 1235.14   38.33
  -4  -3 -19 1578.68   46.93
  -7   3 -19 1550.17   42.75
  -3  -4  19 1231.94   32.09
  -4  -3 -22    6.18    3.06
  -3  -4  22    3.36    1.61
  -3  -4  22    6.57    2.17
  -3   7 -22    2.95    1.62
  -7   3 -22    9.14    2.85
   3   4 -22    4.48    1.85
   7  -4 -22    2.52    1.10
   4  -7 -22    5.90    1.65
   4  -7 -22    4.85    2.36
  -4  -3 -22    5.76    3.54
   7  -4 -22    3.02    2.17
  -7   3 -22    7.15    2.59
  -3  -4  25  124.97   13.18
   3   4 -25   98.58   10.75
  -3   7 -25   99.70   12.44
  -7   3 -25  108.95   12.15
  -3   7 -25   98.71    6.38
   4  -7 -25  123.23   10.18
   7  -4 -25  104.04   11.34
   7  -4 -25  115.38   10.66
  -7   3 -25  147.40   13.57
  -4  -3 -25  122.30   12.22
  -4  -3 -25  149.79   13.96
  -3  -4  25  108.93    8.79
   4  -7 -25  129.36    8.26
  -4  -3 -28   44.75    7.59
  -3  -4  28   35.96    6.93
  -7   3 -28   30.22    6.16
   3   4 -28   33.10    6.33
  -3   7 -28   36.98    7.68
   7  -4 -28   33.47    6.35
   4  -7 -28   40.01    5.52
   7  -4 -28   39.15    7.29
  -3  -4  28   36.73    4.72
  -4  -3 -28   39.96    6.58
  -7   4  31  223.66   14.24
  -3  -4  31  249.79   17.78
   3   4 -31  194.57   16.32
  -3   7 -31  222.91   19.63
  -7   3 -31  207.84   18.06
   7  -4 -31  206.52   17.31
   4  -7 -31  236.15   15.20
   3   4 -31  213.05   14.79
   7  -4 -31  238.32   15.94
  -4  -3 -31  226.13   16.45
  -3  -4  34    6.30    2.49
  -4  -3 -34    7.87    3.97
  -7   4  34    8.19    3.48
  -3   7 -34    3.72    2.76
  -7   3 -34    5.18    3.59
   3   4 -34    9.81    2.32
   4  -7 -34    2.73    2.62
   7  -4 -34    6.84    3.71
   7  -4 -34    4.86    2.99
   3   4 -34    8.73    1.95
  -4  -3 -34    3.57    1.22
  -7   4  37  528.00   21.43
   3   4 -37  544.28   29.15
  -3   7 -37  513.89   30.33
  -7   3 -37  554.02   30.78
   4  -7 -37  516.66   23.92
   3   4 -37  507.03   23.06
   7  -4 -37  547.14   25.34
  -4  -3 -37  452.64   21.31
  -7   4  40   13.39    1.54
  -3   7 -40   12.08    4.72
  -7   3 -40    9.73    4.11
   3   4 -40   16.50    5.22
   7  -4 -40   17.18    4.54
   3   4 -40    9.83    1.71
   4  -7 -40   11.58    3.44
  -4  -3 -40    8.59    2.77
  -7   3 -43  129.05   15.19
   3   4 -43  120.42   14.62
  -3   7 -43  127.17   15.43
   4  -7 -43  126.85   12.17
   3   4 -43  125.79   12.17
   7  -4 -43  131.54   12.59
  -4  -3 -43  102.66    9.46
   3   4 -46  216.68   20.56
  -7   3 -46  200.06   19.76
  -3   7 -46  208.29   20.31
   4  -7 -46  194.59   15.65
  -7   3 -46  228.05   17.92
   3   4 -46  208.89   16.35
  -4  -3 -46  182.68   15.60
   7  -4 -46  201.11   16.28
  -4  -3 -46  155.50   11.82
  -3   7 -49  316.79   25.51
  -7   3 -49  335.23   25.83
   3   4 -49  336.61   26.03
   4  -7 -49  377.54   21.98
   3   4 -49  388.40   22.81
  -4  -3 -49  366.49   23.19
  -7   3 -49  465.09   25.69
   7  -4 -49  380.27   23.11
  -4  -3 -49  268.66   15.47
   4  -7 -52  183.53   15.48
  -4  -3 -52  194.33   16.62
  -7   3 -52  227.04   18.31
   3   4 -52  213.00   17.73
   7  -4 -52  205.98   17.39
   3   4 -52  203.55   21.35
  -3   7 -52  196.88   20.39
  -7   3 -52  189.66   19.47
   7  -3  55   24.36    5.11
   7  -4 -55   15.67    3.74
   4  -7 -55   21.68    7.10
  -7   3 -55   24.37    5.30
  -4  -3 -55   16.46    4.17
   3   4 -55   22.38    6.46
  -3   7 -55    9.19    5.28
   3   4 -55   15.29    4.46
  -7   3 -55   19.00    5.82
   7  -3  58  153.41   17.32
  -3   7 -58  118.21   15.75
  -7   3 -58  116.57   14.98
   3   4 -58  132.04   17.59
   4  -7 -58  120.70   13.07
  -4  -3 -58  120.77   13.55
   3   4 -58  125.03   13.92
   7  -4 -58  115.73   12.92
  -7   3 -61   29.60    5.27
   3   4 -61   40.05   10.17
  -3   7 -61   32.84    7.38
   7  -4 -61   28.46    6.41
   4  -7 -61   25.71    5.97
  -4  -3 -61   24.77    6.17
  -7   3 -64   16.49    5.54
  -7   5 -63    0.71    4.51
   5   2 -63    3.01    1.49
  -7   5 -60    5.56    2.63
  -5   7 -60   10.25    6.11
   2  -7 -60    7.56    1.19
   5   2 -60    5.67    2.30
  -2  -5 -60    7.25    3.06
   7  -2 -60    7.55    3.83
  -5   7 -57   89.26   14.93
   5   2 -57   84.35   12.37
  -7   5 -57   84.63   13.95
   2  -7 -57  100.40   11.34
   7  -2 -57  108.20   12.98
  -2  -5 -57  117.15   14.70
   5   2 -57  106.30   12.50
   5   2 -54    6.98    5.32
  -5   7 -54    9.15    5.30
  -7   5 -54    9.99    5.83
   5   2 -54    9.45    4.73
   2  -7 -54    5.31    1.58
  -2  -5 -54   15.22    5.34
   7  -2 -54    3.53    1.00
  -7   5 -51   28.99    7.98
   5   2 -51   41.70    8.10
  -5   7 -51   41.06    9.41
   2  -7 -51   39.97    7.31
  -2  -5 -51   42.18    8.31
   5   2 -51   33.56    6.73
   7  -2 -51   40.43    7.79
  -2  -5 -51   26.01    4.99
  -7   2  48  133.75   12.35
  -7   5 -48  155.35   18.62
   5   2 -48  159.05   19.65
  -5   7 -48  154.44   19.02
   2  -7 -48  147.17   13.76
  -2  -5 -48  158.89   15.69
   7  -2 -48  138.90   13.85
   5   2 -48  142.98   14.28
  -2  -5 -48  110.32    9.98
  -7   2  45   68.11    8.87
   5   2 -45   77.48   13.69
  -7   5 -45   73.66   11.84
  -5   7 -45   69.96   11.90
   2  -7 -45   72.31    9.27
   7  -2 -45   77.37   10.19
   5   2 -45   70.87   10.09
  -2  -5 -45   63.94    9.33
  -2  -5 -45   55.26    6.95
  -7   2  42  143.50   12.99
  -5  -2  42  150.16   14.29
   2  -7 -42  155.43   11.76
  -7   5 -42  137.48   16.89
  -5   7 -42  138.29   16.50
   5   2 -42  154.67   18.21
   5   2 -42  145.23   14.22
   7  -2 -42  139.11   13.22
   2  -7 -42  129.17   12.46
  -2  -5 -42  159.07   15.73
  -2  -5 -42  119.41   10.06
   2  -7 -39   34.03    5.18
  -5  -2  39   27.02    6.24
  -7   2  39   29.93    5.64
  -2  -5 -39   34.65    5.62
  -5   7 -39   22.74    6.96
  -7   5 -39   37.84    8.54
   5   2 -39   35.86    8.07
   5   2 -39   33.76    6.58
  -7   5 -39   32.46    4.82
   2  -7 -39   32.33    5.99
   7  -2 -39   34.62    7.00
  -2  -5 -39   29.65    5.73
  -5  -2  36  398.18   22.98
  -7   2  36  386.74   20.90
  -7   5 -36  414.75   27.95
   5   2 -36  420.06   27.68
  -5   7 -36  425.79   29.01
   2  -7 -36  361.57   19.40
   5   2 -36  407.90   22.13
   7  -2 -36  385.94   21.62
  -2  -5 -36  384.53   20.25
   2  -7 -36  406.17   19.29
  -2  -5 -36  421.04   20.84
  -7   2  33  153.37   13.06
  -5  -2  33  158.79   14.46
  -7   5 -33  166.84   17.50
   5   2 -33  177.42   17.26
  -5   7 -33  161.01   18.22
   7  -2 -33  159.27   16.10
   2  -7 -33  162.76   12.72
   5   2 -33  178.39   14.53
   7  -2 -33  172.42   14.54
  -2  -5 -33  165.64   13.25
  -2  -5 -33  181.40   13.53
   2  -7 -33  163.72   11.38
   2  -7 -33  171.88   12.36
   2  -7 -30    3.58    1.29
  -5  -2  30    5.28    2.21
  -7   2  30    2.76    0.18
  -2  -5 -30    4.67    0.27
   5   2 -30    3.79    3.12
  -5   7 -30    3.43    3.02
  -7   5 -30    4.27    0.70
   7  -2 -30    5.21    3.29
   7  -2 -30    2.09    1.58
   5   2 -30    3.82    1.71
   2  -7 -30    2.80    1.38
   2  -7 -30    1.23    1.88
  -2  -5 -30    3.29    2.63
  -5  -2  27  328.91   19.56
  -7   5 -27  327.45   22.74
   5   2 -27  375.47   23.28
  -5   7 -27  341.76   23.66
   5   2 -27  357.10   20.36
   7  -2 -27  326.68   21.98
   2  -7 -27  328.99   17.36
   7  -2 -27  342.88   19.48
  -7   2  27  365.07   14.65
   2  -7 -27  358.05   18.13
  -2  -5 -27  341.84   20.06
   2  -7 -27  383.01   18.45
  -2  -5 -27  338.16   18.35
  -5  -2  24   50.24    7.81
   5   2 -24   61.06    9.52
  -7   5 -24   51.29    8.38
  -5   7 -24   60.84   11.07
   7  -2 -24   55.80    7.76
   2  -7 -24   44.03    6.22
   7  -2 -24   45.35    7.69
   2  -7 -24   56.70    7.32
  -2  -5 -24   55.18    7.28
  -7   2  24   54.92    5.44
  -5  -2  21   16.58    3.39
  -2  -5 -21   17.15    3.99
   2  -7 -21   17.89    4.18
   5   2 -21   18.97    5.41
  -5   7 -21   18.50    5.32
  -7   5 -21   15.15    4.90
   2  -7 -21   17.95    3.66
  -5   7 -21   16.01    1.92
   7  -2 -21   25.61    5.92
   5   2 -21   21.00    5.71
  -7   2  21   20.25    3.58
   7  -2 -21   18.92    5.20
  -5  -2  21   16.95    2.66
  -2   7  18  167.67   12.76
  -7   5 -18  184.40   15.18
   5   2 -18  199.04   14.60
  -5   7 -18  175.82   14.92
   5   2 -18  188.86   15.26
   7  -2 -18  164.00   14.66
   7  -2 -18  204.89   15.18
   2   5  18  205.13    8.70
  -5   7 -18  151.00    4.53
   2  -7 -18  174.83   11.27
  -2  -5 -18  182.97   13.55
   2  -7 -18  188.20   13.10
  -5  -2  18  169.40   11.81
   2  -7 -15    4.51    2.05
  -2  -5 -15    6.59    2.16
  -7   5 -15    2.95    3.28
  -5   7 -15    5.46    3.27
   2   5  15    4.33    1.68
   5   2 -15    5.05    3.26
  -2   7  15    3.05    2.14
   5   2 -15    3.95    1.02
   2   5  15    4.28    1.02
  -5  -2  15    5.42    1.51
   7  -2 -15    3.81    1.47
   2   5  12  112.39    7.23
  -2   7  12  125.94   10.70
  -7   5 -12  117.94   10.74
  -5   7 -12  103.95   11.31
   5   2 -12  110.61    9.29
  -5   7 -12  111.79   11.73
   2   5  12  120.58    6.90
   5   2 -12  104.09   10.92
   7  -2 -12  105.10   11.67
   2  -7 -12  116.20   10.22
  -5  -2  12  107.36    9.78
  -2  -5 -12  105.35   10.14
  -7   5  -9 1181.82   32.53
   2   5   9 1196.15   22.84
  -5   7  -9 1186.47   35.01
  -2   7   9 1199.19   32.15
   7  -2  -9 1201.67   40.42
   2   5   9 1267.58   23.59
   5   2  -9 1189.19   35.30
  -5  -2   9 1263.54   33.47
  -2  -5  -9 1203.83   34.29
   2  -7  -9 1269.32   33.34
   2   5   6   30.74    3.63
  -2  -5  -6   30.70    5.75
   2  -7  -6   31.66    5.06
  -2   7   6   28.09    5.01
  -7   5  -6   31.53    5.25
  -5   7  -6   25.65    5.40
   2   5   6   33.34    4.01
   2  -7  -6   29.07    4.64
   5   2  -6   26.02    5.55
   7  -2  -6   29.97    6.64
   2   5   3  260.31   10.56
  -7   5  -3  240.74   14.31
  -7   2   3  278.80   13.22
  -5   7  -3  262.39   15.64
  -2   7   3  273.64   15.07
   7  -2  -3  278.47   19.01
   5   2  -3  272.94   17.11
  -2  -5  -3  286.75   16.60
   2  -7  -3  307.89   16.03
   2  -7  -3  255.56   13.11
  -2   7   0  966.49   28.20
  -7   5   0  949.91   27.74
   7  -2   0 1096.40   34.56
  -5   7   0  965.02   30.02
  -7   2   0  986.07   22.19
   2   5   0  962.38   20.34
   7  -2   0 1010.39   35.31
   5  -7   0  926.04   15.13
   5   2   0 1051.81   33.40
  -2  -5   0  954.27   30.12
  -2  -5   0  978.72   29.46
   2  -7   0  910.02   24.99
   2  -7   0  963.80   27.90
  -2   7  -3  187.16   12.78
   7  -2   3  235.31   17.12
  -5   7   3  175.80   13.09
  -7   5   3  172.36   12.20
  -7   2  -3  182.66    9.35
   2   5  -3  198.34   10.54
   5   2   3  187.51   14.31
   7  -2   3  173.39   14.52
   5  -7  -3  194.78    8.01
  -2  -5   3  203.92   13.83
  -2  -5   3  199.14   12.99
   2  -7   3  214.71   12.99
  -7   2  -3  197.29   13.34
  -5   7   6  292.49   17.49
  -7   5   6  307.75   17.12
   7  -2   6  307.61   18.20
  -2  -5   6  301.60   14.91
  -7   2  -6  310.08   12.46
  -2   7  -6  305.79   16.61
   2   5  -6  277.45   12.57
   5   2   6  312.65   18.07
   7  -5  -6  328.21   19.84
   5  -7  -6  310.13   11.32
   5  -7  -6  325.81   11.59
   2  -7   6  316.59   15.46
  -2  -5   6  312.82   16.91
  -2  -5   6  298.30   15.68
  -7   2  -6  264.25   14.76
   7  -2   9  173.38   12.34
  -5   7   9  220.85   15.61
  -7   5   9  197.07   14.15
  -2  -5   9  199.71   12.19
  -2   7  -9  205.51   13.79
  -7   2  -9  202.76   10.17
  -2   7  -9  204.91   13.83
   2   5  -9  197.29   11.17
   5   2   9  203.25   14.43
   7  -5  -9  210.50   16.04
   7  -5  -9  205.15   11.70
   5  -7  -9  208.97   10.08
   2  -7   9  205.41   12.34
  -7   2  -9  171.51   12.30
   5  -7  -9  232.31    9.16
  -2  -5   9  199.81   13.08
  -2  -5   9  206.12   13.41
   7  -2  12  263.35   15.01
  -5   7  12  320.43   19.38
  -2  -5  12  317.14   15.82
  -2   7 -12  313.06   17.87
   2   5 -12  341.05   16.23
  -7   2 -12  313.48   15.11
   5  -7 -12  335.23   15.79
   7  -5 -12  319.91   19.47
   7  -5 -12  325.88   15.12
   5   2  12  323.46   17.48
   5  -7 -12  314.10   13.30
  -2  -5  12  345.49   17.42
  -2  -5  12  323.36   16.79
   2  -7  12  331.15   15.60
  -7   2 -12  295.29   16.45
  -5   7  15  287.62   18.92
   7  -2  15  250.30   15.16
  -2  -5  15  300.95   16.02
  -2   7 -15  299.82   18.20
  -7   2 -15  299.78   16.15
   2   5 -15  304.50   16.26
   5  -7 -15  315.26   13.93
   7  -5 -15  298.74   18.61
   5   2  15  277.11   15.80
   5  -7 -15  306.70   14.42
   7  -5 -15  320.19   15.71
  -5  -2 -15  286.51   17.49
   2  -7  15  331.43   15.33
  -7   2 -15  286.10   16.23
  -2  -5  15  315.38   16.06
  -2  -5  18  119.87   10.59
   7  -2  18   97.52   10.03
   2   5 -18  103.47   10.27
  -2   7 -18  111.07   11.55
  -7   2 -18  117.97   10.87
   5  -7 -18  119.34    9.06
   7  -5 -18  129.34   10.41
   7  -5 -18  107.31   10.94
   5  -7 -18  110.28    8.64
  -7   2 -18  110.31    9.87
   2  -7  18  142.69   10.00
  -5  -2 -18  106.54   10.38
  -2  -5  18  121.64    9.80
  -2  -5  21  378.00   19.41
   2  -7  21  417.88   16.55
   7  -2  21  346.81   19.38
  -5  -2 -21  457.09   23.71
  -2   7 -21  370.52   22.16
   2   5 -21  355.40   19.56
  -7   2 -21  357.04   20.60
   5  -7 -21  375.05   16.76
   7  -5 -21  380.42   20.89
   7  -5 -21  391.29   18.57
   5  -7 -21  386.40   15.89
  -2  -5  21  362.98   16.10
  -5  -2 -21  352.87   19.48
  -5  -2 -21  402.01   22.86
  -7   2 -21  335.65   17.60
   7  -2  24   37.59    6.77
  -2  -5  24   30.96    4.96
  -5  -2 -24   36.15    6.05
  -7   2 -24   40.45    7.17
   2   5 -24   34.08    6.54
  -2   7 -24   38.39    7.13
  -5  -2 -24   35.11    5.95
   5  -7 -24   36.61    4.83
   5  -7 -24   37.56    5.45
   7  -5 -24   37.15    5.61
  -2  -5  24   31.73    4.76
  -7   2 -24   34.30    5.78
   7  -5 -24   35.19    6.15
  -5  -2 -24   31.46    6.12
  -5  -2 -27   16.77    3.78
  -2  -5  27   19.69    4.52
   7  -2  27   22.10    6.13
  -2  -5  27   17.05    3.24
  -5  -2 -27   19.36    4.21
  -7   2 -27   21.39    4.87
  -2   7 -27   21.35    5.26
   2   5 -27   20.82    5.05
  -2   7 -27   17.14    2.61
   7  -5 -27   21.79    4.70
   5  -7 -27   22.28    4.53
   7  -5 -27   18.33    4.57
  -7   2 -27   18.50    3.81
  -5  -2 -27   15.41    4.19
   7  -2  30   65.70    9.99
   5   2  30   45.51    6.58
   2   5 -30   58.58    8.68
  -2   7 -30   63.34    9.60
  -7   2 -30   57.56    8.47
  -5  -2 -30   55.27    7.89
   5  -7 -30   65.11    7.89
   7  -5 -30   65.83    9.29
   7  -5 -30   66.29    8.08
  -5  -2 -30   51.25    6.99
  -7   2 -30   53.79    7.34
  -5  -2 -30   57.23    8.19
  -7   5  33   24.55    3.96
   7  -2  33   24.65    6.14
   5   2  33   19.99    5.12
  -5  -2 -33   21.08    4.71
  -2   7 -33   29.33    5.27
   2   5 -33   23.71    4.69
  -7   2 -33   25.71    6.99
  -5  -2 -33   24.69    6.13
   7  -5 -33   23.92    5.54
   2   5 -33   24.27    4.57
   5  -7 -33   24.57    5.19
   7  -5 -33   25.60    5.57
  -7   2 -33   24.95    5.21
  -5  -2 -33   20.64    4.85
   7  -2  36  181.30   16.20
   5   2  36  145.21   12.75
  -7   2 -36  172.06   16.64
   2   5 -36  169.55   16.33
  -2   7 -36  162.50   16.53
  -5  -2 -36  138.73   14.02
   5  -7 -36  141.67   12.04
   2   5 -36  143.40   11.95
   7  -5 -36  153.32   13.14
  -5  -2 -36  118.22   10.94
  -5  -2 -36  138.98   11.26
   5   2  39  258.93   17.45
   7  -2  39  329.95   22.71
  -7   2 -39  269.64   20.92
   2   5 -39  309.05   22.80
  -2   7 -39  291.00   22.01
   2   5 -39  287.54   16.90
   7  -5 -39  303.70   18.88
   5  -7 -39  287.54   17.73
  -5  -2 -39  228.21   14.74
   7  -2  42   21.11    5.05
   5   2  42   24.00    4.53
   2   5 -42   20.50    6.31
  -2   7 -42   19.21    6.08
  -7   2 -42   22.23    6.46
   5  -7 -42   17.52    4.05
   2   5 -42   17.59    4.15
   7  -5 -42   16.67    4.14
  -5  -2 -42   12.33    2.95
   7  -2  45   24.95    6.17
   5   2  45   20.50    4.84
   2   5 -45   28.04    7.63
  -2   7 -45   22.95    5.81
  -7   2 -45   17.09    4.08
   7  -5 -45   35.17    7.29
   5  -7 -45   27.58    5.43
   2   5 -45   31.20    6.48
  -5  -2 -45   21.21    4.64
   5   2  48  398.19   24.08
   7  -2  48  432.93   26.73
  -2   7 -48  384.83   26.61
   2   5 -48  428.61   28.86
  -7   2 -48  367.29   25.46
   5  -7 -48  363.39   21.38
  -5  -2 -48  299.53   19.39
   2   5 -48  390.95   21.91
  -7   2 -48  328.74   19.46
   7  -5 -48  388.76   22.92
  -5  -2 -48  265.36   15.64
   7  -2  51   21.22    5.36
  -5  -2 -51   24.81    5.24
   2   5 -51   23.40    4.80
   7  -5 -51   23.10    5.05
   5  -7 -51   30.84    5.99
  -7   2 -51   27.83    5.52
  -2   7 -51   11.84    3.89
   2   5 -51   15.50    5.55
  -7   2 -51   14.13    6.57
   7  -2  54   40.13    8.48
   7  -5 -54   37.45    7.59
   5  -7 -54   34.75    6.56
  -7   2 -54   27.15    5.65
  -5  -2 -54   32.74    6.49
  -2   7 -54   35.61    7.84
   2   5 -54   34.65    9.54
  -7   2 -54   29.90    7.11
   7  -2  57  124.71   13.97
   2   5 -57  104.66   15.79
  -2   7 -57   78.81   12.37
  -5  -2 -57   72.06    9.95
   7  -5 -57   88.16   11.87
  -7   2 -57   76.40    9.83
   5  -7 -57   85.43   10.61
   2   5 -60   47.36   11.13
  -2   7 -60   38.42    8.19
   7  -5 -60   50.57    8.79
   5  -7 -60   46.31    7.31
  -5  -2 -60   42.50    7.57
  -7   2 -60   48.20    8.22
  -6   7 -61    9.50    1.06
  -7   6 -61   13.73    5.21
   7  -1 -61    9.66    3.36
  -7   6 -58   30.48    8.51
  -6   7 -58   30.32    8.30
  -1  -6 -58   26.02    4.32
   6   1 -58   23.46    5.34
   7  -1 -58   24.16    5.60
   1  -7 -58   29.38    5.91
  -6   7 -55  168.42   19.17
  -7   6 -55  162.53   18.64
   1  -7 -55  160.97   15.39
  -1  -6 -55  173.79   17.09
   6   1 -55  172.45   15.88
   7  -1 -55  165.60   15.82
  -7   6 -52  384.59   30.23
  -6   7 -52  393.81   30.55
   1  -7 -52  342.16   22.58
  -1  -6 -52  379.94   25.11
   6   1 -52  366.62   23.18
   7  -1 -52  347.30   22.93
  -7   1  49  124.46   13.41
  -6   7 -49  128.24   17.17
  -7   6 -49  127.19   16.83
   6   1 -49  127.32   13.61
   1  -7 -49  111.31   12.83
  -1  -6 -49  125.93   13.75
   7  -1 -49  116.46   12.83
  -1  -6 -49   96.34    9.23
  -6  -1  46   35.95    7.84
  -7   1  46   35.93    6.15
  -6   7 -46   25.97    7.20
  -7   6 -46   32.28    8.52
   1  -7 -46   30.20    5.92
   6   1 -46   31.37    5.28
   7  -1 -46   36.96    7.08
  -1  -6 -46   34.31    5.23
  -1  -6 -46   25.51    4.38
  -6  -1  43  165.07   15.03
  -7   1  43  154.18   13.99
  -6   7 -43  162.64   18.25
  -7   6 -43  160.29   18.08
   1  -7 -43  151.35   13.80
   6   1 -43  150.93   13.96
   7  -1 -43  151.89   14.26
  -1  -6 -43  164.11   15.63
  -1  -6 -43  131.32   10.61
  -6  -1  40   41.37    6.98
  -1  -6 -40   46.46    6.66
  -7   1  40   43.41    7.71
   1  -7 -40   45.04    6.77
  -6   7 -40   37.20    8.36
  -7   6 -40   40.06    8.91
   7  -1 -40   43.76    7.35
   1  -7 -40   42.61    6.54
   6   1 -40   35.43    6.66
  -1  -6 -40   44.52    8.35
  -1  -6 -40   36.92    5.85
  -7   1  37  285.91   18.45
  -6  -1  37  294.49   19.98
  -7   6 -37  311.71   25.40
  -6   7 -37  312.03   25.21
   6   1 -37  300.68   24.44
   7  -1 -37  298.64   19.28
   6   1 -37  308.86   19.78
  -1  -6 -37  312.07   20.61
   1  -7 -37  287.43   18.04
  -1  -6 -37  318.91   17.69
   1  -7 -37  328.13   17.82
   1  -7 -37  279.29   15.86
  -1  -6 -37  289.40   17.46
  -6  -1  34 1217.08   39.39
  -7   1  34 1180.69   37.27
  -6   7 -34 1340.64   49.83
  -7   6 -34 1340.90   49.54
   6   1 -34 1379.26   51.97
   6   1 -34 1270.72   39.89
   1  -7 -34 1169.42   35.94
   7  -1 -34 1236.24   39.15
  -1  -6 -34 1250.18   35.38
   1  -7 -34 1254.99   33.92
   1  -7 -34 1240.92   34.71
  -1  -6 -34 1209.29   36.02
  -6  -1  31  111.38   11.92
  -7   1  31  108.79   10.64
  -6   7 -31  126.07   15.47
  -7   6 -31  114.45   13.62
   7  -1 -31  122.98   12.47
   7  -1 -31  116.58   13.69
   1  -7 -31  114.40   11.03
   6   1 -31  126.42   12.66
  -7   1  31  115.97    9.06
   1  -7 -31  118.89   10.94
   1  -7 -31  120.08   10.17
  -1  -6 -31  123.42   11.11
  -1  -6 -31  121.46   11.46
  -6  -1  28 1128.57   36.87
  -6   7 -28 1268.69   46.20
  -7   6 -28 1238.13   45.12
   7  -1 -28 1304.91   39.61
   7  -1 -28 1236.08   43.51
   6   1 -28 1317.77   40.16
   1  -7 -28 1147.35   34.11
  -7   1  28 1248.19   29.78
  -6  -1  28 1157.74   31.33
   1  -7 -28 1189.46   33.73
  -1  -6 -28 1252.51   37.13
  -1  -6 -28 1185.74   34.48
   1  -7 -28 1281.65   35.29
  -6  -1  25  218.78   15.71
  -6   7 -25  244.99   19.52
  -7   6 -25  234.80   18.52
   6   1 -25  250.19   19.17
   7  -1 -25  232.63   18.70
   7  -1 -25  277.44   18.15
  -6  -1  25  244.78   14.01
  -1  -6 -25  262.52   16.30
   1  -7 -25  260.14   15.85
  -7   1  25  253.75   13.21
  -7   6 -22  846.38   34.45
  -6   7 -22  863.43   35.03
   6   1 -22  838.19   34.22
   7  -1 -22  891.69   32.12
   7  -1 -22  801.34   33.32
  -1  -6 -22  776.82   27.76
  -7   1  22  844.42   24.22
   1  -7 -22  791.47   27.55
  -6  -1  22  825.43   26.01
  -1   7  19  154.57   11.97
   1   6  19  154.31   10.71
  -6   7 -19  163.61   15.20
  -7   6 -19  168.20   14.81
   6   1 -19  164.23   14.65
  -6   7 -19  174.74    6.94
   7  -1 -19  169.48   15.02
  -1  -6 -19  170.81   13.06
   1  -7 -19  172.30   12.61
  -7   1  19  178.80   10.93
  -6  -1  19  172.70   11.69
   1   6  16  106.88    8.59
  -1   7  16  122.78   10.60
  -7   6 -16  102.47   11.63
  -6   7 -16  115.20   11.99
   6   1 -16  108.20   11.77
   7  -1 -16  108.70   11.84
   1  -7 -16  130.13   11.00
  -6  -1  16  122.36   10.62
  -1  -6 -16  114.18   10.66
   1   6  13  174.56   10.32
  -1   7  13  182.54   12.31
  -7   6 -13  175.30   14.12
  -6   7 -13  184.55   15.15
  -6   7 -13  176.46   14.33
   6   1 -13  170.91   14.61
   7  -1 -13  174.91   15.21
   1  -7 -13  178.77   12.95
  -1  -6 -13  172.40   13.08
  -6  -1  13  187.01   12.93
  -1   7  10  679.84   23.21
  -7   6 -10  683.20   26.42
   1   6  10  666.23   19.85
  -6   7 -10  664.31   26.65
   6   1 -10  662.84   28.23
   7  -1 -10  666.43   30.05
   1  -7 -10  632.78   24.28
  -1  -6 -10  633.53   25.09
  -1   7   7  747.05   24.12
  -6   7  -7  735.58   27.38
   1   6   7  729.89   20.36
  -7   6  -7  746.20   26.61
   7  -1  -7  762.33   32.76
   6   1  -7  754.86   30.13
  -1  -6  -7  792.00   28.31
   1  -7  -7  800.52   27.26
  -6   7  -4 1356.18   35.99
   1   6   4 1363.11   28.05
  -1  -6  -4 1373.82   27.28
  -1   7   4 1381.48   32.40
  -7   6  -4 1318.58   34.41
   7  -1  -4 1374.69   43.80
   6   1  -4 1403.75   41.37
  -1  -6  -4 1384.40   37.06
   1  -7  -4 1327.66   32.40
   1  -7  -4 1357.01   34.83
  -1   7   1  189.73   12.09
  -7   1   1  181.63    8.66
  -1  -6  -1  186.80   10.38
  -6   7  -1  176.13   13.03
  -7   6  -1  185.30   12.98
   1   6   1  184.92   10.51
   6   1  -1  184.13   15.15
   7  -1  -1  184.40   16.14
   1  -7  -1  189.61   12.91
   1  -7  -1  165.59   11.17
  -1  -6  -1  195.03   12.98
  -1  -6  -1  191.49   13.63
   1  -7   2   17.60    4.20
  -1  -6   2   18.29    4.60
  -1  -6   2   16.26    3.50
   1   6  -2   16.77    3.16
   1   6  -2   14.51    3.10
  -7   6   2   11.69    3.30
  -1   7  -2   15.29    3.21
  -6   7   2   14.99    4.04
  -7   1  -2   14.56    2.27
   6  -7  -2   16.89    2.63
   1  -7   2   13.62    2.43
   6   1   2   11.89    3.78
   7  -1   2   13.64    4.14
  -1  -6   2   16.72    3.69
  -7   6   5  225.81   15.22
  -1  -6   5  234.07   12.44
  -7   1  -5  233.88    9.15
  -6   7   5  242.27   15.85
   1   6  -5  236.48   12.64
  -1   7  -5  233.39   14.00
   6   1   5  224.64   16.05
   7  -1   5  230.06   16.51
   6  -7  -5  230.13    9.96
  -1  -6   5  250.43   14.91
  -1  -6   5  267.48   15.86
   1  -7   5  239.41   14.06
   1  -7   5  250.04   14.37
  -1  -6   8  430.44   17.45
  -7   6   8  480.65   22.39
  -6   7   8  500.59   23.45
   7  -1   8  557.12   28.06
  -1   7  -8  471.83   20.27
  -7   1  -8  462.50   15.40
   1   6  -8  461.70   18.91
   6   1   8  463.41   22.40
   7  -6  -8  460.08   16.59
   7  -6  -8  524.31   24.98
   6  -7  -8  440.59   15.02
  -1  -6   8  478.48   21.04
  -7   1  -8  411.78   20.76
  -1  -6   8  473.53   20.65
   1  -7   8  449.16   18.52
   6  -7  -8  573.01   13.36
  -6   7  11  551.85   24.92
   7  -1  11  488.47   22.76
  -7   6  11  525.57   23.94
  -1  -6  11  535.12   20.21
  -7   1 -11  518.17   17.94
   1   6 -11  574.70   22.90
  -1   7 -11  534.55   22.63
  -6  -1 -11  505.58   11.69
   7  -6 -11  558.40   19.18
   6   1  11  535.49   23.80
   6  -7 -11  580.99   23.37
   6  -7 -11  559.64   17.93
   7  -6 -11  554.91   24.97
  -1  -6  11  562.15   22.16
   1  -7  11  535.29   20.06
  -7   1 -11  501.83   22.63
  -1  -6  11  582.14   23.03
  -6   7  14 3338.40   63.02
  -1  -6  14 3157.01   51.15
  -7   6  14 3308.79   62.68
  -1   7 -14 3255.14   58.18
  -6  -1 -14 3043.79   35.54
   1   6 -14 3617.76   61.32
  -7   1 -14 3251.47   49.70
   6   1  14 3398.17   59.96
   7  -6 -14 3322.19   59.91
   7  -6 -14 3239.39   49.00
   6  -7 -14 3473.13   54.88
   6  -7 -14 3277.19   45.91
   1  -7  14 3197.35   47.95
  -1  -6  14 3267.29   51.04
  -7   1 -14 2840.09   54.20
   7  -1  17   71.94    8.20
  -1  -6  17   83.19    8.59
  -6   7  17   84.90   10.42
  -1   7 -17   84.37    9.66
  -6  -1 -17   81.24    6.80
  -7   1 -17   97.10    9.42
   1   6 -17  106.45   11.30
   7  -6 -17   87.10    9.77
   6  -7 -17   84.20    8.41
   6  -7 -17   81.85    7.80
   7  -6 -17   86.51    8.20
  -6  -1 -17   89.88   10.58
   1  -7  17   79.64    7.49
  -1  -6  17   84.84    8.06
  -7   1 -17   71.54    8.69
   7  -1  20  736.66   27.04
   6   1  20  775.47   29.74
  -1  -6  20  895.05   28.78
  -1   7 -20  905.74   34.15
  -6  -1 -20  794.66   23.18
  -7   1 -20  940.81   30.56
   1   6 -20 1070.07   37.47
   6  -7 -20  918.27   27.92
   7  -6 -20  929.04   28.29
   7  -6 -20  913.85   31.34
   6  -7 -20  859.35   25.54
  -1  -6  20  821.95   23.43
   1  -7  20  894.40   24.73
  -7   1 -20  747.48   27.77
  -6  -1 -20  842.67   31.63
   6   1  23  345.46   18.84
   7  -1  23  367.45   19.61
  -6  -1 -23  393.83   17.84
  -1   7 -23  459.69   25.13
   1   6 -23  523.97   27.26
  -7   1 -23  452.70   22.01
   7  -6 -23  498.81   21.59
   7  -6 -23  469.43   22.68
   6  -7 -23  481.94   20.25
   6  -7 -23  450.14   19.32
  -6  -1 -23  433.05   22.64
  -6  -1 -23  441.49   21.48
  -1  -6  23  432.34   16.32
  -7   1 -23  393.70   19.74
   1  -7  23  521.91   18.72
   6   1  26  219.09   15.01
   7  -1  26  247.67   16.61
  -1   7 -26  293.82   20.92
  -6  -1 -26  247.89   15.20
   1   6 -26  333.87   22.45
  -7   1 -26  293.27   18.21
   6  -7 -26  282.55   15.19
   7  -6 -26  294.34   18.02
   7  -6 -26  311.25   17.57
   6  -7 -26  286.37   15.77
  -6  -1 -26  263.07   16.31
  -7   1 -26  241.77   15.01
  -6  -1 -26  287.11   18.45
  -1  -6  26  274.72   12.59
   7  -1  29  257.34   17.33
   6   1  29  224.82   15.42
  -7   1 -29  274.02   18.56
  -6  -1 -29  235.88   15.46
   1   6 -29  337.83   23.08
  -1   7 -29  281.02   20.64
   6  -7 -29  279.79   14.99
   7  -6 -29  291.11   17.95
   7  -6 -29  286.60   17.14
   6  -7 -29  264.02   15.48
  -6  -1 -29  246.83   16.83
  -6  -1 -29  255.40   16.27
  -7   1 -29  200.56   13.45
   7  -1  32  277.80   19.15
   6   1  32  249.05   16.69
  -7   1 -32  276.08   18.93
   1   6 -32  352.45   24.34
  -1   7 -32  284.77   20.54
  -6  -1 -32  237.71   16.36
   7  -6 -32  292.75   18.21
   7  -6 -32  287.86   17.61
   6  -7 -32  261.05   15.90
  -7   1 -32  194.59   13.53
  -6  -1 -32  260.50   15.90
  -6  -1 -32  240.36   16.02
   7  -1  35   94.98   11.17
   6   1  35   86.38   10.01
  -7   1 -35   86.10   10.67
   1   6 -35  106.21   13.54
  -1   7 -35   85.07   11.52
   7  -6 -35   90.89   10.38
   1   6 -35   86.29    8.81
   7  -6 -35   95.14   10.03
   6  -7 -35   94.92    9.79
  -7   1 -35  103.03    9.68
  -6  -1 -35   70.86    8.36
  -6  -1 -35   88.20    9.05
  -7   1 -35   67.30    7.73
   7  -1  38  251.57   19.27
   6   1  38  222.49   16.79
   1   6 -38  286.17   23.17
  -7   1 -38  205.98   17.13
  -1   7 -38  234.77   19.53
   1   6 -38  217.50   14.15
   7  -6 -38  237.13   16.64
   6  -7 -38  219.51   15.40
  -7   1 -38  159.45   12.35
  -6  -1 -38  167.80   12.78
   7  -1  41  259.00   19.53
   6   1  41  216.55   16.64
   1   6 -41  273.67   22.80
  -7   1 -41  208.76   17.14
  -1   7 -41  227.83   19.57
   7  -6 -41  260.53   17.82
   1   6 -41  227.63   14.65
   6  -7 -41  250.22   17.17
  -7   1 -41  185.11   12.89
  -6  -1 -41  186.79   13.44
   6   1  44  241.44   18.40
   7  -1  44  262.30   20.57
   1   6 -44  268.30   22.52
  -7   1 -44  206.92   18.06
  -1   7 -44  224.03   19.40
   6  -7 -44  232.80   16.64
   7  -6 -44  246.03   17.62
  -6  -1 -44  178.72   13.01
   7  -1  47   54.34    8.97
   6   1  47   45.05    8.36
  -1   7 -47   41.90    8.33
   1   6 -47   52.21   10.32
   7  -6 -47   43.32    6.45
   6  -7 -47   42.63    6.64
  -6  -1 -47   28.68    5.26
   7  -1  50  124.14   14.45
   6   1  50  126.85   14.19
  -7   1 -50   83.62    9.48
  -6  -1 -50   80.94    9.52
   7  -6 -50  106.40   11.72
   6  -7 -50  105.18   11.71
  -1   7 -50  103.53   13.59
   1   6 -50  112.79   14.90
   7  -1  53   46.34    8.59
   7  -6 -53   40.17    7.52
   6  -7 -53   35.89    6.42
  -7   1 -53   33.59    5.76
  -6  -1 -53   32.14    6.29
   1   6 -53   38.07    8.65
  -1   7 -53   32.37    7.08
  -7   1 -56  127.66   12.11
  -6  -1 -56  128.10   12.34
   7  -6 -56  185.36   16.79
   6  -7 -56  166.13   15.38
  -1   7 -56  169.03   18.17
   1   6 -56  160.21   17.43
  -7   1 -59   76.09    9.99
   7  -6 -59  104.08   13.21
   6  -7 -59   91.43   11.99
  -6  -1 -59   73.52    9.56
  -1   7 -59   89.80   13.27
   1   6 -59  106.46   14.65
  -7   1 -62  393.03   21.72
  -6  -1 -62  389.95   22.16
   0  -7 -59   -1.46    2.11
   7   0 -59    1.32    3.19
   0  -7 -56  555.68   30.35
   7   0 -56  569.00   30.24
   7   0 -53   -1.63    1.54
   0  -7 -53    0.34    1.53
  -7   7 -53    1.60    3.14
  -7   0  50    4.66    3.32
   7   0 -50   12.11    4.14
   0  -7 -50    7.22    1.21
  -7   7 -50    4.66    5.45
  -7   0  47    6.41    2.67
   7   0 -47   -0.08    2.80
   0  -7 -47    4.15    2.96
  -7   7 -47    3.67    2.14
  -7   0  44    1.99    2.46
   7   0 -44    5.51    0.64
   0  -7 -44    4.83    1.84
  -7   0  41    2.90    3.66
   0  -7 -41    0.82    2.10
  -7   7 -41    0.46    3.44
   7   0 -41   -1.07    1.09
   0  -7 -41    0.13    4.24
   0  -7 -41    1.41    1.99
  -7   0  38  626.98   28.83
   0  -7 -38  603.24   27.86
   7   0 -38  664.55   29.66
   0  -7 -38  624.35   25.53
   0  -7 -38  648.02   25.87
   0  -7 -35    1.96    2.43
  -7   0  35    1.62    1.03
  -7   7 -35   -1.76    2.56
   0  -7 -35    1.68    1.75
   7   0 -35   -0.13    1.96
   0  -7 -35    1.89    1.19
   0  -7 -32   37.10    5.80
  -7   0  32   42.24    6.67
  -7   7 -32   40.90    9.22
   7   0 -32   40.40    7.61
   0  -7 -32   37.44    5.91
  -7   0  32   41.82    6.09
   0  -7 -29    4.18    2.02
  -7   0  29    1.91    2.26
  -7   7 -29   -1.73    3.60
   7   0 -29    0.66    1.39
   7   0 -29    1.10    3.30
  -7   0  29   -1.69    2.19
   0  -7 -29    2.34    1.32
   0  -7 -26   42.61    6.49
  -7   7 -26   27.11    6.54
   7   0 -26   23.87    6.27
  -7   0  26   36.65    5.77
   0  -7 -23    2.26    2.78
   0   7  23    2.32    0.59
  -7   7 -23    4.40    3.42
   7   0 -23    0.38    2.39
  -7   0  23    2.42    1.28
   0   7  20 2280.27   43.76
  -7   7 -20 2453.58   57.86
   7   0 -20 2347.21   56.80
   0  -7 -20 2328.59   49.07
  -7   0  20 2517.32   45.96
  -7   7 -17    0.07    2.01
   0   7  17    1.24    0.85
   0  -7 -17    1.96    1.59
   7   0 -17   -0.08    1.73
  -7   0  17    3.40    1.16
   0   7  14 1179.19   29.78
  -7   7 -14 1202.96   38.46
  -7   7 -14 1243.21   37.80
   7   0 -14 1192.20   39.88
   0  -7 -14 1133.63   34.63
   0   7  11    1.79    0.58
  -7   7 -11    1.08    0.57
   0  -7 -11    2.27    2.21
   0  -7 -11    0.38    0.91
   7   0 -11    0.87    1.88
  -7   7  -8 2006.16   46.59
   0  -7  -8 2023.07   29.52
   0   7   8 1948.80   37.52
   7   0  -8 1949.08   51.76
   0  -7  -8 1861.59   44.18
  -7   7  -5    1.17    1.18
   0   7   5    1.23    0.74
   0  -7  -5    2.11    0.98
   0  -7  -5    1.39    0.22
   7   0  -5    4.26    1.32
   0  -7  -2  451.98   15.66
  -7   0   2  442.64   12.95
  -7   7  -2  417.81   20.23
   0   7   2  454.40   18.28
   7   0  -2  427.22   24.58
   0  -7  -2  479.41   21.93
   0  -7  -2  429.53   19.51
  -7   0  -1    2.66    0.84
  -7   7   1   -0.44    2.05
   0   7  -1    3.24    1.54
   0  -7   1    1.68    1.20
   0  -7   1    1.75    2.46
   0  -7   1   -0.02    0.48
  -7   7   4  303.58   17.86
   0  -7   4  298.72   13.93
  -7   0  -4  271.77    7.03
   0   7  -4  292.48   14.89
   0   7  -4  297.53   15.16
   7  -7  -4  308.69   12.54
   7   0   4  286.51   19.52
   0  -7   4  297.60   16.86
   0  -7   4  296.65   16.23
   0  -7   7    2.90    1.80
   0  -7   7    2.40    2.20
  -7   0  -7    2.64    0.90
   0   7  -7    2.55    1.32
  -7   7   7    0.68    1.72
   7  -7  -7    3.98    1.17
   7   0   7    3.35    3.37
   0  -7   7    0.81    2.21
  -7   7  10 1924.91   47.48
   0  -7  10 1860.24   37.48
   0   7 -10 1905.89   41.46
  -7   0 -10 2012.28   30.80
   7   0  10 1866.82   46.83
   7  -7 -10 2164.20   49.10
   7  -7 -10 1873.14   33.64
   7  -7 -10 2060.77   19.10
   0  -7  10 1864.02   40.24
   0  -7  13    2.22    1.51
  -7   0 -13    2.48    1.25
  -7   7  13    0.72    0.80
   0   7 -13    2.96    2.32
   7  -7 -13    2.67    1.89
   7  -7 -13    2.20    1.48
  -7   0 -13    1.31    2.58
   0  -7  16   30.36    4.97
   7   0  16   29.26    5.72
  -7   0 -16   29.27    4.24
  -7   7  16   27.69    6.17
   0   7 -16   30.93    6.19
   7  -7 -16   36.32    5.35
  -7   0 -16   31.63    5.79
   7  -7 -16   33.13    5.82
   7   0  19    1.38    1.61
   0  -7  19    1.29    0.57
  -7   0 -19    1.66    1.72
   0   7 -19    2.09    1.40
   7  -7 -19    2.34    1.94
   7  -7 -19    2.32    1.71
  -7   0 -19    3.13    2.41
   7   0  22   28.40    5.77
  -7   0 -22   30.67    5.05
   0   7 -22   40.73    7.69
   7  -7 -22   34.79    5.48
   0  -7  22   38.54    5.15
   7  -7 -22   37.66    6.20
  -7   0 -22   34.10    6.20
   0  -7  25    1.67    0.73
   7   0  25    3.87    2.18
   0   7 -25    2.52    2.01
  -7   0 -25    2.45    2.78
   7  -7 -25    5.55    3.37
   7  -7 -25    5.00    1.95
  -7   0 -25    3.75    1.75
   7   0  28 1910.92   46.26
   0   7 -28 2383.82   58.53
   7  -7 -28 2412.95   49.49
   7  -7 -28 2221.02   46.20
  -7   0 -28 1910.50   46.21
   7   0  31    6.71    2.68
  -7   0 -31    2.61    2.67
   0   7 -31    1.29    1.49
   7  -7 -31    2.80    3.27
   7  -7 -31    3.26    1.10
  -7   0 -31    3.05    2.47
   7   0  34  560.40   26.85
   0   7 -34  605.92   30.96
   7  -7 -34  588.75   24.94
  -7   0 -34  666.45   26.58
   7   0  37    3.03    1.43
   0   7 -37    3.78    2.90
   7  -7 -37    1.45    2.11
  -7   0 -37    2.25    2.53
   7   0  40  280.54   20.00
   0   7 -40  293.32   21.93
   7  -7 -40  267.91   17.74
   7   0  43    3.43    1.16
   0   7 -43   -3.34    4.06
   7  -7 -43    3.27    0.27
  -7   0 -43   -1.54    1.99
   7   0  46  327.33   22.90
   0   7 -46  284.91   22.23
   7  -7 -46  278.40   18.70
   7   0  49   -0.21    1.32
   0   7 -49   -1.40    0.71
   7   0  52  156.11   16.23
   7  -7 -52  117.29   12.81
   0   7 -52  121.26   15.29
   7  -7 -55    2.15    1.07
  -7   0 -55    3.13    2.11
   0   7 -58  265.64   22.59
   7  -7 -58  286.53   20.77
  -7   0 -61    1.20    1.60
   8  -4   0  165.52   12.49
  -8   4   0  139.39   10.65
  -4   8   0  151.41   12.31
   4  -8   0  153.35   11.62
   4   4   0  172.42    6.41
   4  -8   0  169.38    6.94
   4   4   0  160.61   11.71
  -4  -4   0  168.65   15.25
  -8   4   0  170.32   11.55
   4  -8  -3   87.17    8.79
  -8   4  -3   91.89    8.05
  -8   4   3   91.57    8.35
   8  -4  -3  136.39   12.73
  -4   8   3   92.58    9.58
  -4   8  -3   87.40    9.44
   8  -4   3   90.59    8.64
   4   4  -3  104.11    5.96
   4  -8  -3  107.35    6.31
   4   4  -3   99.07    9.15
   8  -4  -3   86.52   11.31
   4   4   3  100.26    9.03
   4  -8   3   98.34    4.23
  -4  -4   3  107.66   12.09
  -4  -4  -3  102.28   12.38
  -8   4  -3   99.34    9.10
  -8   4   3  110.30    9.00
   4  -8  -3   89.88    7.58
   8  -4   6  321.56   16.64
  -8   4  -6  354.23   16.68
  -4   8  -6  376.59   19.87
   4  -8  -6  402.41   19.03
   8  -4  -6  455.06   21.95
  -4   8   6  372.77   19.73
  -8   4   6  358.22   17.82
   4   4  -6  381.84   13.49
   4   4  -6  364.29   18.32
   4  -8  -6  412.14   13.58
   4   4   6  376.32   17.40
   8  -4  -6  363.76   22.72
  -4  -4   6  382.51   22.07
  -8   4  -6  441.46   19.68
  -4  -4  -6  419.99   24.32
   4  -8  -6  376.15   15.34
  -8   4   6  501.47   19.13
  -4  -4   6  377.19   19.22
  -8   4  -9 2634.24   46.05
   4  -8  -9 2507.50   47.77
  -8   4   9 2407.29   48.57
  -4   8   9 2622.14   53.37
  -4   8  -9 2566.06   53.19
   8  -4   9 2457.19   50.03
   4   4  -9 2696.51   40.06
   4   4  -9 2606.44   50.83
   4  -8  -9 2628.81   37.15
   8  -4  -9 2638.33   59.85
   4   4   9 2767.61   47.47
  -4  -4   9 2498.22   54.57
  -8   4   9 2766.16   38.85
  -8   4  -9 2735.93   51.16
  -4  -4  -9 2839.05   63.87
  -4  -4   9 2532.33   49.28
   4  -8  -9 2685.48   39.88
  -4   8  12  132.05   12.20
   4  -8 -12  121.82   10.61
  -4   8 -12  129.84   12.36
  -8   4 -12  122.48    9.86
  -4   8 -12  124.37   12.15
   4   4 -12  141.37   10.13
  -8   4 -12  120.39   10.86
   4   4 -12  141.23   12.46
   8  -4 -12  124.17   13.29
   4  -8 -12  132.20    9.08
   4   4  12  138.51   10.71
  -8   4 -12  135.34   11.58
  -4  -4  12  127.56   12.29
  -4  -4 -12  142.86   14.99
  -8   4  12  118.13    6.78
  -4  -4  12  132.55   11.10
  -4   8  15 1198.10   37.54
   4  -8 -15 1178.07   33.03
  -4  -4  15 1143.40   34.52
  -4   8 -15 1172.40   38.07
   4   4 -15 1251.93   32.17
  -8   4 -15 1167.47   34.62
   8  -4 -15 1132.90   39.99
   4   4  15 1287.05   32.72
   4  -8 -15 1205.85   28.48
   8  -4 -15 1193.32   33.28
   4  -8 -15 1217.53   23.70
  -4  -4  15 1091.32   34.82
  -8   4 -15 1273.26   36.63
  -4  -4 -15 1381.33   44.96
  -4  -4  15 1141.05   32.90
  -4  -4  18  383.93   20.33
  -4   8  18  412.84   22.21
   4  -8 -18  397.01   19.26
   4   4 -18  438.48   20.17
  -4   8 -18  417.06   23.59
  -8   4 -18  397.35   21.20
   4   4  18  447.53   18.89
   4  -8 -18  398.07   17.27
   8  -4 -18  404.33   19.86
   4  -8 -18  428.04   12.94
   8  -4 -18  418.12   23.99
  -4  -4  18  379.90   20.33
  -8   4 -18  409.56   21.07
  -4  -4 -18  445.68   26.07
  -4  -4  18  392.29   19.45
  -4  -4  21  407.04   21.45
  -4   8  21  389.82   22.21
   4  -8 -21  438.21   20.29
  -4   8 -21  403.12   23.94
  -8   4 -21  395.94   21.47
   4   4 -21  402.31   20.42
   8  -4 -21  383.25   22.65
   4  -8 -21  424.15   18.66
   4   4  21  446.86   18.60
   8  -4 -21  413.38   20.24
  -4  -4  21  389.86   19.96
  -4  -4  21  419.94   20.63
  -4  -4  24 1797.10   45.85
  -4   8 -24 1838.90   52.86
  -8   4 -24 1712.12   48.09
   4   4 -24 1821.18   45.33
   4  -8 -24 1802.81   39.87
   8  -4 -24 1832.77   49.28
   8  -4 -24 1805.94   43.27
  -4  -4  24 1730.84   41.02
  -4  -4  27  533.44   25.51
  -4   8 -27  564.79   30.39
  -8   4 -27  533.95   27.22
   4   4 -27  531.97   25.76
   4  -8 -27  502.24   21.72
   8  -4 -27  533.40   27.06
   8  -4 -27  504.45   23.42
  -4  -4 -27  611.35   30.16
  -4  -4  27  498.31   21.18
  -4  -4 -27  549.24   27.84
  -4  -4  30  249.52   18.57
  -4   8 -30  252.31   21.02
  -8   4 -30  248.96   20.19
   4   4 -30  258.87   18.49
   4  -8 -30  241.63   15.55
   8  -4 -30  249.07   18.87
   8  -4 -30  242.99   16.74
  -4  -4 -30  240.78   17.17
  -4  -4 -30  314.04   21.33
  -8   4  33  861.70   29.62
  -4  -4  33  924.44   35.65
  -8   4 -33  892.23   39.18
  -4   8 -33  951.15   41.37
   4   4 -33  896.29   35.98
   8  -4 -33  875.26   31.91
   8  -4 -33  927.88   37.71
   4  -8 -33  858.93   30.00
  -4  -4 -33  879.26   33.32
  -4  -4  36   33.23    7.30
  -4  -4 -36   42.04    7.51
  -8   4  36   32.43    6.38
  -4   8 -36   20.93    6.43
   4   4 -36   17.70    5.40
  -8   4 -36   30.17    7.76
   4  -8 -36   28.41    6.42
   8  -4 -36   30.57    6.14
   8  -4 -36   26.50    6.89
  -4  -4 -36   30.87    6.14
  -8   4  39 1098.53   33.59
  -4  -4  39 1212.52   43.31
   4   4 -39 1058.09   41.10
  -8   4 -39 1042.32   43.66
  -4   8 -39 1116.51   46.60
   4  -8 -39 1061.87   35.09
   8  -4 -39 1064.31   36.59
   4   4 -39 1070.17   35.77
  -4  -4 -39 1011.03   33.80
  -8   4 -42  224.77   20.50
  -4   8 -42  251.64   22.33
   4   4 -42  238.34   20.05
   4  -8 -42  227.56   16.37
   4   4 -42  239.78   17.14
   8  -4 -42  237.55   17.61
  -4  -4 -42  202.66   14.68
  -4   8 -45   12.70    4.55
   4   4 -45   13.04    5.82
  -8   4 -45    7.53    2.30
  -8   4 -45   21.61    4.43
   4   4 -45   19.04    5.90
   4  -8 -45   18.37    5.70
   8  -4 -45   14.38    2.48
  -4  -4 -45   16.82    3.95
  -4   8 -48   24.31    5.65
  -8   4 -48   17.65    3.57
   4   4 -48   15.92    6.79
  -4  -4 -48   18.27    5.02
   4  -8 -48   20.18    4.82
   4   4 -48   20.81    4.55
   8  -4 -48   22.35    5.47
  -4  -4 -48   14.88    3.41
  -8   4 -51  106.02   14.40
   4   4 -51  113.41   15.40
  -4   8 -51  129.34   16.77
   4  -8 -51   92.49   11.03
   8  -4 -51  107.22   12.05
   4   4 -51  107.45   12.10
  -4  -4 -51   81.16   10.43
  -4  -4 -51   81.49    8.49
   4   4 -54   14.71    6.25
  -8   4 -54   13.12    4.75
  -4   8 -54   18.98    6.44
   4  -8 -54   16.69    4.42
   4   4 -54   18.77    6.52
  -4  -4 -54   17.80    4.08
   8  -4 -54   23.61    6.11
  -4  -4 -54   14.41    3.84
   8  -4  57  739.37   40.46
   4  -8 -57  537.40   27.79
   8  -4 -57  576.67   29.88
   4   4 -57  623.15   30.80
  -4  -4 -57  440.65   24.44
  -4   8 -57  611.40   36.68
   4   4 -57  600.12   36.84
  -8   4 -57  534.73   32.86
  -4  -4 -60  106.86   12.45
   4   4 -60  142.86   18.47
  -8   4 -60  116.35   15.69
   8  -4  63  135.41   17.01
  -8   4 -63   93.25   14.24
   5   3 -61  434.42   32.15
  -8   5 -61  410.24   31.22
   5   3 -61  454.66   27.55
   5   3 -58  252.34   24.03
  -8   5 -58  280.44   25.36
  -5   8 -58  289.74   26.05
   3  -8 -58  257.18   19.72
  -3  -5 -58  252.54   19.78
   5   3 -58  295.32   22.42
   8  -3 -58  283.67   21.45
  -8   5 -55   34.10    8.95
  -5   8 -55   29.89    8.28
   5   3 -55   21.27    6.24
  -3  -5 -55   39.52    7.56
   3  -8 -55   39.05    6.79
   5   3 -55   43.29    8.56
   8  -3 -55   35.44    7.30
  -3  -5 -55   31.00    5.92
  -5   8 -52   44.37    9.26
  -8   5 -52   48.41    8.96
   5   3 -52   49.14   10.12
   3  -8 -52   39.80    7.46
   5   3 -52   42.48    8.08
   8  -3 -52   41.49    8.00
  -3  -5 -52   37.66    7.04
  -3  -5 -52   30.91    5.47
  -5   8 -49   53.02   10.77
   5   3 -49   52.72   10.95
  -8   5 -49   47.47   10.81
   3  -8 -49   50.12    9.00
   5   3 -49   52.25    8.54
   8  -3 -49   53.34    8.99
  -3  -5 -49   40.73    8.12
  -3  -5 -49   38.96    6.08
   5   3 -46  253.92   22.40
  -8   5 -46  242.65   22.37
  -5   8 -46  239.01   21.90
   3  -8 -46  197.93   16.03
   5   3 -46  217.05   17.63
  -3  -5 -46  188.27   16.60
   8  -3 -46  207.71   17.05
  -3  -5 -46  171.58   12.89
  -5  -3  43 1234.16   44.20
  -8   3  43 1139.96   36.33
  -8   5 -43 1190.99   48.63
   5   3 -43 1268.88   49.79
  -5   8 -43 1208.84   49.75
   3  -8 -43 1108.83   37.05
   8  -3 -43 1138.14   38.92
   5   3 -43 1179.33   39.49
  -3  -5 -43 1008.71   32.46
  -8   3  40  194.02   14.75
  -5  -3  40  215.65   17.78
   5   3 -40  183.72   18.36
  -8   5 -40  181.64   18.69
  -5   8 -40  162.43   18.83
   3  -8 -40  193.57   15.24
   5   3 -40  189.06   15.81
   8  -3 -40  196.11   16.29
  -3  -5 -40  247.65   17.62
  -3  -5 -40  173.02   13.69
  -8   3  37   15.75    3.94
   3  -8 -37   24.67    4.82
  -3  -5 -37   22.50    5.49
  -5  -3  37   18.26    5.25
   5   3 -37   11.58    4.67
  -5   8 -37   10.87    5.64
  -8   5 -37   15.08    4.42
   5   3 -37   17.61    4.23
   8  -3 -37   12.20    3.73
   3  -8 -37   19.80    4.45
   8  -3 -37   21.57    5.71
  -3  -5 -37   19.24    4.97
   3  -8 -34    6.42    2.76
  -5  -3  34   12.56    7.83
  -8   3  34    7.73    3.60
  -3  -5 -34    6.54    0.71
  -8   5 -34    5.36    2.34
  -5   8 -34    9.65    4.35
   5   3 -34    6.66    1.54
   8  -3 -34    7.97    3.95
   3  -8 -34    7.72    2.25
   8  -3 -34   11.76    4.31
  -3  -5 -34    8.20    2.97
  -5  -3  31  751.83   31.24
   3  -8 -31  770.22   27.64
  -8   5 -31  752.58   35.01
  -5   8 -31  809.37   38.15
   5   3 -31  839.08   35.80
   8  -3 -31  742.24   29.65
   8  -3 -31  808.13   34.90
   3  -8 -31  718.62   26.85
  -3  -5 -31  810.34   31.46
  -3  -5 -31  741.58   30.02
  -5  -3  28  185.49   15.20
   5   3 -28  221.80   17.66
  -5   8 -28  197.75   18.55
  -8   5 -28  189.77   17.32
   8  -3 -28  178.71   16.06
   3  -8 -28  192.42   13.43
   8  -3 -28  184.05   14.54
   3  -8 -28  231.43   13.87
  -3  -5 -28  197.65   15.42
  -3  -5 -28  190.79   15.43
   3  -8 -28  192.36   13.77
  -5  -3  25 1300.81   39.39
   5   3 -25 1452.89   43.88
  -5   8 -25 1339.03   46.32
  -8   5 -25 1318.65   43.34
   8  -3 -25 1341.36   43.36
   3  -8 -25 1372.08   35.07
   8  -3 -25 1382.11   39.11
  -5  -3  25 1338.32   36.26
  -3  -5 -25 1428.77   41.67
   3  -8 -25 1421.28   37.72
  -3   8  22  740.39   29.64
  -5  -3  22  788.56   30.14
  -5   8 -22  797.45   34.21
  -8   5 -22  749.81   31.47
   5   3 -22  833.88   31.54
   8  -3 -22  838.40   30.39
   3  -8 -22  817.11   26.51
   8  -3 -22  763.74   32.49
   3  -8 -22  875.14   29.43
  -5  -3  22  796.51   27.62
  -3  -5 -22  889.05   33.05
   3   5  19  112.28    7.45
  -3   8  19  113.71   11.48
  -5  -3  19   96.02   10.26
  -5   8 -19  111.27   12.71
  -8   5 -19  105.97   11.82
   5   3 -19  130.76   11.58
   5   3 -19  119.52   12.69
   3  -8 -19  105.66    9.05
   8  -3 -19  119.89   11.19
   8  -3 -19  109.34   12.41
  -3  -5 -19  123.12   12.50
   3  -8 -19  123.33   10.96
  -5  -3  19  101.28    9.97
   3   5  16   91.67    6.43
  -3   8  16   95.16   10.36
  -8   5 -16   93.93    9.95
  -5   8 -16  101.92   11.96
   5   3 -16   99.41    9.64
   5   3 -16   96.88   10.79
   3   5  16  104.69    7.68
   3  -8 -16  110.70    9.00
   8  -3 -16  100.39   12.17
  -3  -5 -16  113.80   12.12
   3  -8 -16  120.57   10.77
  -5  -3  16  105.00    9.94
   3   5  13 2970.59   34.60
  -3   8  13 3048.13   57.51
   5   3 -13 3129.42   49.25
  -5   8 -13 2977.40   60.01
  -8   5 -13 2988.40   53.39
  -5   8 -13 2968.51   59.34
  -8   5 -13 3013.83   56.32
   8  -3 -13 3007.57   65.89
   5   3 -13 2972.25   59.19
   3   5  13 3159.64   42.01
   3  -8 -13 3003.91   44.62
  -5  -3  13 2960.99   53.42
  -3  -5 -13 2897.80   59.32
   3  -8 -13 3001.32   53.94
   3   5  10 1512.07   23.58
  -5   8 -10 1534.79   41.78
  -8   5 -10 1491.17   37.73
  -3   8  10 1546.21   39.75
   5   3 -10 1542.40   31.29
   8  -3 -10 1488.40   46.67
   5   3 -10 1445.70   39.88
   3   5  10 1558.81   30.14
   3  -8 -10 1600.00   30.79
   3  -8 -10 1555.14   38.64
  -5  -3  10 1553.19   39.35
  -3  -5 -10 1482.28   42.05
   3   5   7  612.66   14.76
  -5   8  -7  602.58   26.30
  -8   5  -7  600.71   23.39
  -8   3   7  560.58   21.91
  -3   8   7  629.58   25.08
   5   3  -7  583.29   16.95
   3   5   7  644.14   19.85
   5   3  -7  606.02   25.39
   8  -3  -7  593.01   29.32
   3  -8  -7  691.11   19.10
  -3  -5  -7  609.27   26.57
   3  -8  -7  649.55   24.65
   3  -8  -7  631.14   21.28
   3  -8  -4   29.12    5.09
  -3  -5  -4   23.79    5.23
   3   5   4   27.90    3.00
  -8   5  -4   19.21    4.52
  -5   8  -4   30.45    5.75
  -8   3   4   27.04    5.05
  -3   8   4   31.42    5.04
   3   5   4   25.81    4.07
   3  -8  -4   27.02    4.52
   5   3  -4   27.22    5.59
   8  -3  -4   23.27    5.61
  -8   3   4   18.78    3.64
  -8   5  -1   35.82    5.57
   8  -3  -1   55.54    8.17
  -8   3   1   42.82    5.30
  -5   8  -1   40.08    6.81
  -3   8   1   48.36    6.62
   3   5   1   32.31    2.98
   3   5   1   48.25    5.97
   5  -8   1   49.24    3.10
   5   3  -1   45.98    6.70
  -8   3   1   44.15    5.61
   3  -8  -1   60.10    7.53
   8  -3  -1   36.94    7.47
  -3  -5  -1   51.00    7.67
   3  -8  -1   55.74    6.37
   8  -5  -2  427.28   18.26
  -8   5   2  411.00   19.04
  -8   3  -2  443.10   16.63
  -5   8   2  417.84   20.73
  -3   8  -2  430.00   20.55
   3   5  -2  313.97   10.10
   3   5  -2  462.11   19.07
   5   3   2  472.26   22.16
   8  -3   2  435.51   24.25
   5  -8  -2  410.04   11.29
  -3  -5   2  406.05   21.28
   3  -8   2  408.35   18.94
  -8   3  -2  363.19   16.69
  -8   3  -5 3183.41   44.88
  -5   8   5 3134.94   57.81
  -8   5   5 3133.63   54.74
  -3   8  -5 3107.52   56.43
   8  -3   5 2848.05   51.93
   3   5  -5 2736.00   36.02
   8  -5  -5 3204.13   64.97
   5   3   5 3311.52   58.55
   5  -8  -5 3049.57   34.73
  -3  -5   5 3027.90   54.19
  -5  -3  -5 3088.58   63.68
  -8   3  -5 2788.33   48.90
  -3  -5   5 2924.47   56.39
   5  -8  -5 3210.91   41.85
   3  -8   5 2993.12   51.19
  -5   8   8  347.45   19.92
  -8   5   8  340.69   18.37
   8  -3   8  278.14   15.73
  -3  -5   8  365.12   18.31
  -8   3  -8  346.57   15.16
   3   5  -8  302.26   12.95
  -3   8  -8  338.75   19.07
   5   3   8  359.50   19.13
   5  -8  -8  377.84   13.58
   8  -5  -8  357.64   21.80
  -5  -3  -8  350.06   21.04
  -3  -5   8  351.96   18.13
   5  -8  -8  379.76   14.22
  -8   3  -8  345.01   17.50
  -3  -5   8  367.11   19.91
   3  -8   8  378.38   18.12
   3  -8  11   22.92    4.37
  -3  -5  11   22.60    4.96
  -3  -5  11   19.45    5.04
   8  -5 -11   27.37    4.87
   8  -3  11   21.79    4.72
  -5  -3 -11   20.03    4.74
  -8   3 -11   16.06    4.24
  -3   8 -11   19.19    4.70
   3   5 -11   15.18    3.38
  -5   8  11   23.12    5.08
  -8   5  11   14.82    4.01
  -3   8 -11   17.12    3.43
   5  -8 -11   23.29    3.60
  -3  -5  11   23.63    4.70
   5   3  11   18.45    4.28
  -8   3 -11   22.23    4.68
   8  -5 -11   18.87    5.02
   3  -8  14   31.57    5.28
   8  -3  14   29.83    5.40
  -3  -5  14   29.62    5.35
  -5  -3 -14   30.47    6.24
  -3  -5  14   30.44    5.67
  -3   8 -14   30.33    6.08
   3   5 -14   31.88    4.82
  -8   3 -14   26.76    4.61
  -5   8  14   28.38    5.74
   5  -8 -14   31.85    4.38
   8  -5 -14   34.37    5.64
  -3  -5  14   31.04    5.48
   8  -5 -14   33.38    6.53
   5  -8 -14   29.45    4.22
   5   3  14   33.28    5.82
  -8   3 -14   26.10    4.98
   8  -3  17  330.97   18.93
  -5   8  17  350.75   21.37
  -3  -5  17  362.91   19.09
  -3   8 -17  339.15   20.83
  -8   3 -17  324.46   17.63
   3   5 -17  325.57   16.74
   8  -5 -17  345.29   21.06
   5   3  17  333.49   17.67
   5  -8 -17  364.51   15.97
   5  -8 -17  370.93   15.06
   8  -5 -17  345.87   17.24
  -5  -3 -17  355.39   20.95
  -8   3 -17  364.39   19.09
  -3  -5  17  363.47   18.85
  -3  -5  17  379.12   19.53
   8  -3  20  236.83   16.77
  -3  -5  20  228.50   15.78
  -5   8  20  219.79   17.24
  -3   8 -20  229.72   17.81
  -8   3 -20  222.71   15.51
   3   5 -20  219.49   14.36
   5   3  20  225.95   14.25
   5  -8 -20  243.97   13.75
   8  -5 -20  237.58   14.70
   5  -8 -20  249.35   12.10
   8  -5 -20  222.47   17.09
  -8   3 -20  240.61   16.03
  -5  -3 -20  232.46   16.44
  -3  -5  20  239.37   14.91
   8  -3  23 1856.26   49.48
  -3  -5  23 1804.62   44.73
   3   5 -23 1726.23   42.62
  -3   8 -23 1828.26   51.71
  -8   3 -23 1729.27   46.31
   5  -8 -23 1717.07   37.87
   8  -5 -23 1753.34   41.89
   5   3  23 1948.30   42.55
   8  -5 -23 1822.46   48.39
  -8   3 -23 1676.72   43.40
  -5  -3 -23 1641.41   43.95
  -3  -5  23 1724.09   38.89
  -5  -3 -23 1812.05   48.35
   8  -3  26  994.80   37.87
  -3  -5  26  921.18   33.29
   3   5 -26  869.46   31.74
  -3   8 -26  938.75   38.71
  -8   3 -26  860.73   34.60
   5  -8 -26  871.85   27.90
   8  -5 -26  957.64   35.21
   8  -5 -26  909.36   30.97
  -8   3 -26  895.86   32.34
  -5  -3 -26  827.25   30.67
  -3  -5  26  880.44   26.79
  -5  -3 -26  885.30   33.81
  -3  -5  29   37.27    6.35
   8  -3  29   44.28    8.01
  -5  -3 -29   31.46    5.87
  -8   3 -29   36.58    6.96
   3   5 -29   41.62    6.94
  -3   8 -29   40.90    8.31
   5  -8 -29   34.45    5.56
   8  -5 -29   39.65    6.68
   8  -5 -29   33.09    6.65
  -8   3 -29   33.33    6.46
  -5  -3 -29   34.95    6.64
  -3  -5  32  103.72   11.85
   8  -3  32  105.85   13.44
   3   5 -32   94.32   11.56
  -3   8 -32  105.05   13.76
  -8   3 -32   87.43   11.39
   5  -8 -32   87.74    9.57
   8  -5 -32   93.99   11.05
   8  -5 -32   92.05   10.21
  -5  -3 -32   92.44   10.72
  -5  -3 -32   87.28    9.66
  -8   5  35 1206.57   33.20
  -3   8 -35 1287.14   48.47
   3   5 -35 1125.21   40.19
  -8   3 -35 1183.83   43.12
   5  -8 -35 1157.96   35.37
   8  -5 -35 1223.92   38.00
   8  -5 -35 1246.03   42.95
  -5  -3 -35 1124.63   34.18
  -5  -3 -35 1184.03   38.34
   3   5 -38 1043.09   39.49
  -3   8 -38 1095.98   44.30
  -8   3 -38 1028.67   40.98
   8  -5 -38 1163.10   41.85
   5  -8 -38 1035.51   34.11
   8  -5 -38 1097.57   36.63
  -5  -3 -38  984.61   33.56
  -5  -3 -38 1032.48   32.08
   8  -3  41  392.29   26.51
  -8   3 -41  338.63   24.21
  -3   8 -41  360.30   25.95
   3   5 -41  364.23   23.90
   3   5 -41  332.82   19.41
   5  -8 -41  328.81   19.63
   8  -5 -41  339.59   20.94
  -5  -3 -41  291.81   17.52
   8  -3  44    1.73    0.82
  -8   3 -44   -3.06    3.63
   3   5 -44    4.48    3.39
  -3   8 -44    1.88    0.66
   8  -5 -44    3.42    1.52
   3   5 -44    1.36    2.18
   5  -8 -44    2.91    1.75
  -5  -3 -44    2.02    1.09
   8  -3  47   17.62    5.25
   3   5 -47    6.39    1.88
  -3   8 -47    9.46    5.36
  -8   3 -47    7.37    4.57
   8  -5 -47   19.79    5.26
   5  -8 -47   11.86    3.52
   3   5 -47   13.87    2.73
  -5  -3 -47   11.65    3.54
   8  -3  50   82.25   11.73
   3   5 -50   73.32   12.01
  -8   3 -50   64.76   10.72
  -3   8 -50   57.70   10.44
  -5  -3 -50   53.88    7.65
   5  -8 -50   62.31    9.48
   8  -5 -50   72.86   10.63
   3   5 -50   62.66    9.17
  -8   3 -50   59.47    8.08
  -5  -3 -50   53.18    7.12
   8  -3  53  886.05   40.11
  -3   8 -53  768.01   39.25
  -8   3 -53  665.42   34.99
   3   5 -53  775.85   39.46
   5  -8 -53  733.72   31.49
   8  -5 -53  768.07   33.76
  -5  -3 -53  594.64   27.15
  -8   3 -53  591.51   25.18
  -5  -3 -53  544.71   22.65
   8  -3  56  109.77   13.98
   8  -5 -56   93.18   11.11
   5  -8 -56   91.12   10.37
  -5  -3 -56   75.18    9.49
  -3   8 -56   81.61   12.15
   3   5 -56  100.93   14.12
   8  -3  59   29.96    8.13
  -3   8 -59   18.96    6.61
   3   5 -59   18.74    7.00
   5  -8 -59   15.09    4.33
  -5  -3 -59   12.03    4.70
   8  -5 -59   24.34    6.18
  -8   6 -62   21.31    5.07
   6   2 -62   21.01    6.11
  -6   8 -59    5.41    5.09
  -8   6 -59    6.42    6.64
   2  -8 -59    2.97    5.35
   6   2 -59    1.78    3.13
  -2  -6 -59   11.60    4.84
   8  -2 -59    8.90    4.39
  -6   8 -56  156.94   19.01
  -8   6 -56  134.14   17.78
   2  -8 -56  127.81   13.06
  -2  -6 -56  150.60   16.23
   8  -2 -56  138.17   14.33
   6   2 -56  145.88   15.27
  -8   6 -53   -0.94    3.88
  -6   8 -53   11.28    7.47
   2  -8 -53    1.36    2.43
   8  -2 -53    9.02    3.29
  -2  -6 -53    2.93    2.04
   6   2 -53    3.58    2.59
  -8   2  50   71.59    9.35
   6   2 -50   62.61    6.94
  -6   8 -50   78.46   13.05
  -8   6 -50   78.09   13.65
  -2  -6 -50   87.51   13.35
   2  -8 -50   75.47    9.84
   6   2 -50   65.08    9.87
   8  -2 -50   73.56   10.42
  -2  -6 -50   62.09    7.65
  -6  -2  47   98.52   11.91
  -8   2  47   96.41   11.42
   6   2 -47   92.40   12.54
  -6   8 -47   96.83   15.07
  -8   6 -47  103.81   14.91
   2  -8 -47   87.10   10.38
   6   2 -47   92.68   11.73
   8  -2 -47   92.08   11.15
  -2  -6 -47  109.85   13.52
  -2  -6 -47   74.28    8.32
  -6  -2  44   93.12   11.86
  -8   2  44   75.67    9.32
  -6   8 -44   73.26   12.05
   6   2 -44   59.78    8.71
  -8   6 -44   68.81   11.96
  -2  -6 -44  100.23   12.81
   2  -8 -44   79.14    9.80
   6   2 -44   78.91   10.67
   8  -2 -44   77.23    9.66
  -2  -6 -44   74.41    8.91
  -8   2  41   25.47    5.07
  -2  -6 -41   27.05    4.79
   2  -8 -41   23.93    4.56
  -6  -2  41   27.74    7.36
   6   2 -41   25.04    0.96
  -6   8 -41   21.16    4.81
  -8   6 -41   26.24    7.73
   6   2 -41   18.76    5.04
   2  -8 -41   19.56    2.65
   8  -2 -41   23.89    5.48
  -2  -6 -41   20.90    3.59
   2  -8 -38   17.92    4.35
  -8   2  38   12.50    4.52
  -6  -2  38   11.47    3.60
  -2  -6 -38   14.30    2.89
  -6   8 -38   19.38    6.73
  -8   6 -38   16.35    6.16
   6   2 -38   11.28    2.58
   6   2 -38   16.95    4.28
   8  -2 -38   16.34    3.80
   2  -8 -38   15.88    3.74
  -2  -6 -38   15.51    3.88
  -6  -2  35   79.37   10.34
  -8   2  35   74.42    9.07
   6   2 -35   76.35   11.52
  -8   6 -35   73.38   12.67
  -6   8 -35   73.62   12.40
   6   2 -35   79.70   10.19
   2  -8 -35   80.69    8.93
   8  -2 -35   70.76    9.34
   8  -2 -35   67.87   10.14
  -2  -6 -35   85.40   10.00
  -2  -6 -35   77.24    9.55
   2  -8 -35   85.09    9.14
   2  -8 -32   18.62    4.01
  -6  -2  32   21.36    5.71
  -2  -6 -32   18.93    4.11
   6   2 -32   16.21    1.78
  -6   8 -32   18.51    5.25
  -8   6 -32   14.11    5.08
   8  -2 -32   16.73    5.59
   8  -2 -32   18.82    4.29
   2  -8 -32   17.41    4.07
   2  -8 -32   22.31    3.83
  -2  -6 -32   18.09    4.37
  -6  -2  29   80.55    9.42
  -8   6 -29  105.65   13.28
   6   2 -29  123.68   14.16
  -6   8 -29   99.41   13.00
   8  -2 -29  109.68   13.40
   8  -2 -29  104.21   11.37
   2  -8 -29   90.05    9.53
  -2  -6 -29   92.21   10.19
   2  -8 -29   92.08    9.55
  -6  -2  29   93.26    9.49
   2  -8 -29  106.25    9.89
  -2  -6 -29  102.87   11.36
  -6  -2  26   30.24    6.22
  -2  -6 -26   41.20    6.89
   6   2 -26   21.24    4.85
  -8   6 -26   22.96    5.85
  -6   8 -26   30.13    6.81
   8  -2 -26   32.76    6.37
   8  -2 -26   24.74    5.96
   2  -8 -26   37.64    5.97
   2  -8 -26   48.47    7.44
  -6  -2  26   40.96    6.33
   2  -8 -23    6.22    1.84
  -2  -6 -23    7.25    2.96
  -6   8 -23    6.83    4.54
  -8   6 -23    3.92    2.43
  -2   8  23    5.85    1.45
   6   2 -23    6.81    2.86
   6   2 -23   11.47    3.63
   8  -2 -23    4.86    0.82
   2  -8 -23    5.95    2.01
  -6  -2  23    3.67    2.06
   8  -2 -23    7.31    4.01
   2   6  20  188.21   11.30
  -2   8  20  202.23   14.40
  -8   6 -20  204.60   16.53
  -6   8 -20  200.31   17.08
   6   2 -20  204.59   15.50
   6   2 -20  197.28   16.63
   8  -2 -20  199.55   16.86
   2  -8 -20  190.35   12.39
  -2  -6 -20  188.05   14.49
   2  -8 -20  200.06   14.27
  -6  -2  20  190.38   13.24
  -2   8  17  238.17   15.87
   2   6  17  222.59   11.57
  -8   6 -17  242.52   17.45
  -6   8 -17  241.74   18.02
   6   2 -17  238.63   17.93
   8  -2 -17  235.25   18.39
  -6  -2  17  253.99   15.65
   2  -8 -17  256.57   16.26
  -2  -6 -17  236.83   16.43
   2   6  14  110.88    7.83
  -2   8  14  117.06   10.98
  -8   6 -14  107.11   12.50
  -6   8 -14  113.95   12.48
  -6   8 -14  116.51   12.47
  -8   6 -14  112.89   11.54
   2   6  14  129.00    7.11
   6   2 -14  119.57   12.28
   8  -2 -14  115.28   13.16
   2  -8 -14  116.52   10.87
  -6  -2  14  112.40   10.20
  -2  -6 -14  107.60   10.94
   2  -8 -11   15.05    4.05
  -2  -6 -11   11.62    2.12
   2   6  11    6.55    1.99
  -8   6 -11    6.69    2.50
  -6   8 -11    7.04    1.87
  -2   8  11    5.21    2.54
   6   2 -11    7.78    3.81
   8  -2 -11    8.78    3.20
  -2   8   8  371.62   18.54
  -6   8  -8  369.51   20.74
   2   6   8  366.91   13.58
  -8   6  -8  351.89   18.95
   8  -2  -8  374.24   24.03
   6   2  -8  370.15   21.40
  -2  -6  -8  363.38   20.01
   2  -8  -8  383.24   19.63
  -8   6  -5    8.41    2.92
  -6   8  -5    8.91    3.37
  -8   2   5   11.05    2.87
  -2   8   5    7.33    2.40
   2   6   5   11.79    2.56
   2  -8  -5    9.98    2.38
  -2  -6  -5   10.89    3.30
   2  -8  -5    8.34    2.13
   8  -2  -5   12.69    5.20
   6   2  -5   15.30    5.37
   2   6   2   40.50    4.61
   2   6   2   34.80    4.18
  -8   6  -2   34.90    5.78
  -6   8  -2   32.85    5.59
  -2   8   2   35.61    5.95
  -8   2   2   35.28    4.59
  -2  -6  -2   37.69    6.65
   8  -2  -2   38.62    7.64
   2  -8  -2   35.13    5.26
   2  -8  -2   43.06    6.46
   6   2  -2   37.07    6.57
  -8   2  -1  212.62   10.57
  -8   6   1  188.48   13.96
  -2  -6   1  205.20   12.40
  -2   8  -1  215.10   14.27
  -6   8   1  203.35   14.62
   2   6  -1  216.81   10.91
   6  -8  -1  196.28    7.55
   6   2   1  234.78   16.94
   8  -2   1  209.50   17.27
   2  -8   1  200.65   13.63
  -2  -6   1  205.71   14.06
  -2  -6   1  206.09   15.15
   2  -8   1  187.80   12.33
  -8   6   4  289.84   17.27
  -8   2  -4  321.87   12.87
  -6   8   4  324.08   18.76
   8  -2   4  356.71   21.96
  -2  -6   4  347.83   16.53
  -2   8  -4  336.76   18.30
   2   6  -4  332.97   14.82
   6   2   4  322.25   20.17
   8  -2   4  272.63   18.86
   6  -8  -4  329.78   11.25
  -2  -6   4  367.54   19.92
   2  -8   4  362.99   18.00
  -2  -6   4  341.59   18.11
   2  -8   4  350.42   17.32
  -8   2  -4  321.71   18.17
   8  -6  -7   77.07    7.84
  -6   8   7   61.03    8.45
  -8   2  -7   58.00    5.36
   8  -2   7   51.94    7.56
  -2  -6   7   63.15    7.26
  -8   6   7   59.63    8.24
  -2   8  -7   58.79    7.61
   2   6  -7   49.58    5.51
  -2   8  -7   55.18    7.63
   6   2   7   51.85    7.65
   8  -6  -7   64.58    9.57
   6  -8  -7   59.35    5.38
   2  -8   7   57.17    7.13
  -2  -6   7   64.99    8.43
  -2  -6   7   59.59    7.72
  -8   2  -7   48.28    6.67
   6  -8  -7   63.64    5.58
  -2  -6  10    4.87    0.12
   2  -8  10    5.13    1.32
   8  -6 -10    7.77    3.09
   8  -2  10    5.79    2.88
  -2  -6  10    8.60    3.26
  -8   2 -10    5.40    1.73
  -2   8 -10    4.75    2.35
  -8   6  10    3.81    1.31
  -6   8  10    7.32    3.41
   2   6 -10    4.46    2.51
   6  -8 -10    7.31    2.05
   8  -6 -10    2.84    1.48
   6  -8 -10    7.96    1.53
  -8   2 -10    6.06    1.80
   8  -6 -10    3.19    2.52
   6   2  10    4.16    0.62
  -2  -6  10   16.03    5.48
   8  -2  13   38.93    6.13
   8  -6 -13   78.06    7.74
  -2  -6  13   50.13    6.55
  -8   6  13   45.69    8.05
  -2   8 -13   46.60    6.65
  -8   2 -13   40.55    5.51
  -6   8  13   48.04    7.48
   2   6 -13   50.28    6.63
   6  -8 -13   53.91    6.82
   8  -6 -13   49.02    6.33
   6  -8 -13   59.69    6.25
  -8   2 -13   55.70    7.52
   2  -8  13   58.62    7.17
   8  -6 -13   43.51    7.61
   6   2  13   38.34    6.63
  -2  -6  13   52.87    7.00
  -2  -6  13   58.74    7.99
  -6   8  16  129.93   13.62
  -2  -6  16  139.31   11.20
   8  -2  16  113.16   10.41
  -2   8 -16  135.83   12.99
  -8   2 -16  128.95   10.76
   2   6 -16  135.11   11.31
   6   2  16  123.67   11.62
   8  -6 -16  130.69   12.80
   6  -8 -16  131.56   10.49
   8  -6 -16  140.53   11.00
   6  -8 -16  139.53   10.12
  -2  -6  16  149.19   12.37
  -6  -2 -16  137.57   12.82
  -8   2 -16  129.29   11.41
   2  -8  16  145.53   10.99
  -2  -6  16  138.27   11.51
  -6   8  19  143.52   15.08
   8  -2  19  105.97   11.41
  -2  -6  19  122.86   11.09
  -2   8 -19  130.78   13.07
  -8   2 -19  117.35   10.85
   2   6 -19  137.42   12.04
   8  -6 -19  128.14   12.68
   6  -8 -19  134.45   10.24
   6   2  19  135.05   12.29
   8  -6 -19  122.83   10.85
   6  -8 -19  117.35    9.50
  -8   2 -19   93.12    9.84
   2  -8  19  129.36   10.28
  -6  -2 -19  118.95   11.58
  -2  -6  19  125.99   10.64
   2  -8  22   75.51    7.91
  -2  -6  22   61.36    8.35
   8  -2  22   42.51    6.79
  -8   2 -22   52.18    8.08
  -2   8 -22   57.57    9.08
  -6   8  22   45.02    8.47
   2   6 -22   45.00    7.22
   6  -8 -22   60.95    6.90
   8  -6 -22   68.05    8.34
   6  -8 -22   50.90    6.23
   8  -6 -22   44.58    7.17
  -6  -2 -22   55.72    8.02
  -8   2 -22   59.36    7.34
  -6  -2 -22   56.09    8.90
  -2  -6  22   61.73    7.15
  -2  -6  25   20.93    5.17
   8  -2  25   20.92    5.78
  -6  -2 -25   21.16    4.64
  -2  -6  25   19.79    3.71
  -8   2 -25   23.95    5.24
   2   6 -25   24.35    5.70
  -2   8 -25   26.48    6.78
   6  -8 -25   18.20    3.98
   8  -6 -25   24.81    4.80
   8  -6 -25   22.77    5.33
  -8   2 -25   12.12    3.24
  -6  -2 -25   19.40    4.41
   8  -2  28  173.21   15.25
  -2  -6  28  172.04   14.21
   2   6 -28  171.57   14.74
  -2   8 -28  182.83   17.29
  -8   2 -28  160.83   14.06
   6  -8 -28  153.82   11.68
   8  -6 -28  184.30   15.33
   8  -6 -28  165.96   13.25
  -8   2 -28  113.12   10.81
  -6  -2 -28  159.19   13.46
  -6  -2 -28  168.63   14.59
   8  -2  31   94.71   11.61
   2   6 -31  106.12   12.16
  -2   8 -31  113.94   13.87
  -8   2 -31   91.44   11.11
   6  -8 -31   89.63    9.14
   8  -6 -31   98.33   10.77
   8  -6 -31  106.15   11.75
  -8   2 -31   69.23    8.48
  -6  -2 -31   83.14    9.58
  -6  -2 -31   96.01   11.16
   8  -2  34   36.31    7.99
  -6  -2 -34   30.18    5.12
   2   6 -34   28.09    6.72
  -2   8 -34   29.41    6.75
  -8   2 -34   30.72    7.77
   8  -6 -34   33.01    6.27
   6  -8 -34   30.06    5.41
   8  -6 -34   29.30    6.42
  -8   2 -34   25.29    5.40
  -6  -2 -34   34.20    6.30
   8  -2  37   10.28    5.84
  -6  -2 -37    8.23    2.45
   2   6 -37    9.61    1.29
  -2   8 -37   10.48    4.24
  -8   2 -37    5.69    1.88
   8  -6 -37   11.55    2.79
   6  -8 -37   12.33    3.56
   8  -6 -37    6.02    3.15
  -8   2 -37    8.72    3.74
  -6  -2 -37    7.02    2.70
   8  -2  40  231.39   19.26
  -2   8 -40  209.23   19.27
  -8   2 -40  197.88   17.28
   2   6 -40  205.22   18.66
   6  -8 -40  196.65   14.66
   8  -6 -40  213.01   16.44
  -6  -2 -40  172.54   13.59
   8  -2  43    6.64    1.90
   2   6 -43    7.55    3.25
  -2   8 -43    6.22    1.90
   8  -6 -43    9.00    3.61
   6  -8 -43    6.34    3.18
   2   6 -43    5.90    2.42
  -6  -2 -43    9.70    2.83
   8  -2  46   35.83    7.64
  -2   8 -46   34.20    6.89
   2   6 -46   35.35    8.30
   6  -8 -46   30.68    6.65
   8  -6 -46   29.93    6.36
  -6  -2 -46   20.15    4.10
   8  -2  49   65.35   11.19
   2   6 -49   59.41   11.36
  -2   8 -49   53.18   10.48
   8  -6 -49   49.87    8.01
   6  -8 -49   54.36    8.46
  -6  -2 -49   41.21    6.58
   8  -2  52   53.39    9.67
  -2   8 -52   45.82   10.18
   2   6 -52   38.73    8.25
  -8   2 -52   39.70    6.90
  -6  -2 -52   49.77    7.35
   8  -6 -52   63.57   10.47
   6  -8 -52   52.71    7.64
  -6  -2 -52   40.74    6.31
   8  -2  55   -0.42    2.63
   6  -8 -55    3.48    2.43
   8  -6 -55    2.97    1.89
  -8   2 -55    1.29    2.07
  -6  -2 -55   -2.62    3.23
  -2   8 -55   -1.79    4.54
   2   6 -55    5.43    0.77
   8  -2  58   -0.59    4.40
   8  -6 -58    5.28    0.88
   6  -8 -58    5.10    1.22
  -8   2 -58    1.63    1.56
  -6  -2 -58    1.10    2.81
   2   6 -58    5.07    2.61
   7   1 -60   14.94    3.74
  -8   7 -60   19.17    7.43
   1  -8 -57  281.63   21.47
  -1  -7 -57  292.35   23.43
   7   1 -57  277.23   21.00
   8  -1 -57  274.08   20.79
  -7   8 -57  314.29   27.04
  -8   7 -57  274.74   25.69
   1  -8 -54  159.38   15.56
  -1  -7 -54  174.26   17.21
   7   1 -54  167.22   16.40
   8  -1 -54  167.55   16.43
  -8   7 -54  172.89   20.48
  -7   8 -54  171.11   20.30
  -8   1  51  182.86   16.12
   7   1 -51  170.72   16.13
   1  -8 -51  198.63   17.32
  -1  -7 -51  200.74   18.72
   8  -1 -51  176.43   15.65
  -7   8 -51  171.64   19.36
  -8   7 -51  180.93   19.67
  -8   1  48  102.59   12.12
  -7  -1  48  109.46   13.23
  -8   7 -48  110.12   15.20
  -7   8 -48  112.70   15.90
   1  -8 -48   99.25   11.51
   7   1 -48  106.89   12.60
  -1  -7 -48  114.87   13.56
   8  -1 -48  100.97   12.50
  -8   1  45   42.75    8.12
  -7  -1  45   39.70    7.68
  -7   8 -45   42.72   10.32
  -8   7 -45   41.75   10.41
   7   1 -45   48.39    8.37
   1  -8 -45   37.41    6.95
   8  -1 -45   32.58    6.57
  -1  -7 -45   43.44    8.79
  -1  -7 -45   40.03    6.38
  -7  -1  42  469.36   26.34
  -8   1  42  441.29   24.35
  -8   7 -42  487.83   32.15
  -7   8 -42  513.36   33.17
   1  -8 -42  429.32   23.66
   7   1 -42  462.70   26.17
   8  -1 -42  432.50   24.51
  -1  -7 -42  482.40   27.67
   1  -8 -42  447.56   22.05
  -1  -7 -42  487.16   23.48
  -1  -7 -42  433.65   21.55
  -7  -1  39  590.24   28.84
  -8   1  39  574.22   27.21
  -7   8 -39  591.91   35.04
  -8   7 -39  630.06   35.54
   7   1 -39  622.87   29.70
   1  -8 -39  589.23   26.89
   8  -1 -39  585.72   28.11
  -1  -7 -39  652.64   31.55
   1  -8 -39  632.29   26.13
  -1  -7 -39  616.92   26.65
  -1  -7 -39  634.52   26.55
  -7  -1  36   23.36    4.20
  -1  -7 -36   27.04    5.01
  -8   1  36   23.21    5.12
   1  -8 -36   27.08    5.21
  -8   7 -36   23.94    6.40
  -7   8 -36   30.81    6.42
   7   1 -36   27.49    4.63
   8  -1 -36   28.72    6.16
   1  -8 -36   23.42    5.11
  -7  -1  36   26.03    5.57
   1  -8 -36   20.83    4.27
  -1  -7 -36   30.59    5.36
  -8   1  33   85.64   10.00
  -7  -1  33   81.00   10.34
  -7   8 -33   82.27   12.59
  -8   7 -33   91.79   12.96
   8  -1 -33   95.79   12.79
   8  -1 -33  105.65   12.29
   1  -8 -33   86.99    9.54
   1  -8 -33   94.63   10.09
  -1  -7 -33   88.74   10.02
   1  -8 -33   97.13    9.63
  -7  -1  33   89.73    8.83
  -1  -7 -33   94.22   10.21
  -7  -1  30   91.30   11.12
  -7   8 -30   91.40   13.27
  -8   7 -30  100.86   13.03
   8  -1 -30   85.22   11.93
   8  -1 -30  105.11   11.83
   1  -8 -30   98.99   10.61
   1  -8 -30  102.84    9.88
   1  -8 -30  103.66   10.49
  -1  -7 -30  105.66   11.08
  -1  -7 -30   92.71   10.16
  -7  -1  30   98.32    9.85
  -7  -1  27  134.69   12.48
  -1   8  27  147.67   12.71
  -7   8 -27  151.01   16.54
  -8   7 -27  156.88   16.08
   7   1 -27  156.10   15.77
   8  -1 -27  152.14   15.65
   1  -8 -27  142.37   12.12
  -1  -7 -27  147.61   12.91
  -7  -1  27  160.17   12.08
   1  -8 -27  161.79   13.19
   1   7  24  129.57   10.40
  -1   8  24  121.11   10.99
  -7   8 -24  130.03   14.56
  -8   7 -24  140.95   14.88
   7   1 -24  136.91   14.15
   8  -1 -24  134.35   14.21
  -7  -1  24  125.43   10.61
   1  -8 -24  126.80   11.79
  -1  -7 -24  123.12   11.68
  -8   1  24  136.91   10.13
  -1   8  21  825.96   28.61
   1   7  21  851.79   26.31
  -7   8 -21  868.26   36.71
  -8   7 -21  885.17   35.77
   7   1 -21  856.17   35.62
   8  -1 -21  888.09   36.11
   1  -8 -21  934.06   31.78
  -1  -7 -21  906.51   31.77
  -7  -1  21  960.83   30.14
   1   7  18  277.34   14.29
  -1   8  18  302.33   17.33
  -8   7 -18  291.65   20.16
  -7   8 -18  295.57   20.68
   7   1 -18  304.25   20.62
   8  -1 -18  295.87   20.94
   1  -8 -18  399.95   20.82
  -1  -7 -18  376.16   20.58
  -7  -1  18  358.22   18.85
  -1   8  15  108.72    9.64
   1   7  15  106.80    8.63
  -7   8 -15  106.82   12.02
  -8   7 -15  100.40   11.16
  -7   8 -15  107.47   11.96
  -8   7 -15  105.18   12.25
   7   1 -15  108.08   12.36
   8  -1 -15  114.95   12.89
  -1  -7 -15   98.45   10.58
   1  -8 -15  106.21   10.58
   1   7  12    8.20    2.49
  -8   7 -12    7.03    3.51
  -1   8  12    6.54    2.55
  -7   8 -12    5.88    2.67
   1  -8 -12   12.62    3.97
  -1  -7 -12    6.56    2.49
   7   1 -12    8.00    2.43
   8  -1 -12    5.57    2.35
  -1   8   9  900.89   28.05
  -7   8  -9  910.43   33.06
  -8   7  -9  903.74   31.99
  -1  -7  -9 1000.17   23.77
   1   7   9  895.82   24.24
   7   1  -9  867.83   34.61
   8  -1  -9  916.78   37.78
  -1  -7  -9  927.31   32.67
   1  -8  -9  935.00   31.89
  -1   8   6 1405.41   34.73
  -1  -7  -6 1453.24   29.24
  -7   8  -6 1387.01   39.48
  -8   7  -6 1367.64   37.90
   1   7   6 1363.82   29.99
   8  -1  -6 1477.97   47.74
   7   1  -6 1401.26   44.12
  -1  -7  -6 1355.69   39.44
   1  -8  -6 1375.98   38.05
  -1   8   3  333.20   16.94
  -7   8  -3  328.60   19.02
   1   7   3  328.87   14.95
  -1  -7  -3  353.25   14.88
  -8   7  -3  314.34   17.84
  -8   1   3  359.38   13.97
   8  -1  -3  344.90   22.76
   7   1  -3  339.95   21.83
  -1  -7  -3  374.14   20.45
   1  -8  -3  328.26   16.98
   1  -8  -3  357.47   19.26
  -7  -1   0  134.24    4.81
  -1   8   0  175.80   12.64
  -8   7   0  158.30   12.94
  -1  -7   0  160.55   10.55
  -7   8   0  165.10   13.47
  -8   1   0  164.67    8.32
   1   7   0  163.32   10.11
   1   7   0  158.29   10.42
   7   1   0  163.75   15.20
   8  -1   0  182.91   16.40
  -1  -7   0  167.08   12.74
   1  -8   0  160.09   11.86
  -1  -7   0  160.92   13.45
   1  -8   0  167.70   13.05
  -1  -7   3   79.98    7.72
  -8   7   3   71.79    8.94
  -7   8   3   78.09    9.41
  -1   8  -3   75.08    8.15
  -8   1  -3   78.58    5.33
   1   7  -3   74.68    7.39
   7  -8  -3   75.74    5.52
   7   1   3   69.52   10.20
   8  -1   3   79.09   10.75
  -1  -7   3   76.64    9.28
   1  -8   3   79.59    8.77
   1  -8   3   76.41    8.29
  -1  -7   3   75.84    8.53
  -8   7   6  854.72   31.52
  -1  -7   6  778.84   24.27
  -7   8   6  842.92   31.79
  -1   8  -6  812.16   27.05
   1   7  -6  798.86   25.04
  -8   1  -6  760.46   16.08
  -1   8  -6  818.83   27.53
   8  -1   6  779.97   32.29
   7   1   6  819.06   32.26
   7  -8  -6  753.10   18.70
  -1  -7   6  805.37   29.47
   1  -8   6  741.94   26.24
  -1  -7   6  839.39   29.05
   1  -8   6  776.30   26.89
  -8   7   9 1256.69   38.27
  -7   8   9 1343.53   40.72
  -1  -7   9 1261.30   31.99
  -8   1  -9 1116.75   24.81
  -1   8  -9 1241.83   35.36
   1   7  -9 1287.69   33.71
   7  -8  -9 1266.93   26.37
   8  -7  -9 1308.40   41.23
   8  -1   9 1114.34   38.06
   8  -7  -9 1245.77   28.70
   7   1   9 1185.61   37.92
  -1  -7   9 1341.68   37.15
  -8   1  -9 1222.93   38.34
  -1  -7   9 1402.07   38.43
   1  -8   9 1302.40   34.13
  -1  -7  12   51.24    6.58
   8  -1  12   36.83    6.59
  -8   1 -12   44.70    5.37
   1   7 -12   49.84    7.16
  -1   8 -12   42.89    6.83
  -8   7  12   42.20    7.16
  -7   8  12   43.16    7.19
   8  -7 -12   50.68    6.07
   7  -8 -12   46.45    7.27
   7  -8 -12   55.64    6.05
  -8   1 -12   52.73    7.41
   1  -8  12   48.81    6.67
  -1  -7  12   51.62    7.11
  -1  -7  12   54.78    7.15
   7   1  12   37.31    6.70
   8  -7 -12   44.05    6.96
  -7   8  15   88.21   11.62
  -8   7  15   70.02   10.18
  -1  -7  15   70.00    7.92
   8  -1  15   64.01    8.15
  -1   8 -15   75.35    9.28
  -8   1 -15   83.53    7.77
   1   7 -15   85.59    9.82
   7   1  15   74.60    9.61
   8  -7 -15   84.43   10.01
   8  -7 -15   75.89    8.02
   7  -8 -15   83.78    9.20
   7  -8 -15   75.66    7.51
  -1  -7  15   78.39    8.51
   1  -8  15   73.96    7.80
  -8   1 -15   60.50    8.57
  -1  -7  18    6.54    2.65
   8  -1  18    5.44    2.18
   1  -8  18    9.25    2.82
  -1  -7  18    5.76    2.62
   1   7 -18    5.34    1.99
  -8   1 -18    8.65    3.07
  -7   8  18    4.39    1.15
  -1   8 -18    8.41    2.58
  -8   7  18   14.01    4.73
   7  -8 -18    9.48    2.68
   8  -7 -18   10.37    1.85
  -8   1 -18    8.90    2.97
   8  -7 -18    8.35    3.35
   7  -8 -18    8.08    2.71
  -7  -1 -18    5.50    1.53
  -7   8  21  389.51   24.55
  -1   8 -21  387.38   23.19
  -8   1 -21  378.66   18.65
   1   7 -21  437.52   24.58
   8  -7 -21  411.66   19.49
   7  -8 -21  406.09   18.21
   8  -7 -21  368.59   20.86
   7  -8 -21  386.70   19.19
  -1  -7  21  378.36   17.07
  -7  -1 -21  375.45   22.19
   1  -8  21  409.24   18.09
  -8   1 -21  341.43   20.62
   8  -1  24   79.63    9.58
   1   7 -24  103.14   11.86
  -1   8 -24   96.81   11.75
   7  -8 -24  101.09    9.73
   8  -7 -24   89.73   10.01
   8  -7 -24   85.19    9.08
   7  -8 -24   89.15    8.72
  -7  -1 -24   94.80   10.68
   1  -8  24   94.36    8.69
  -1  -7  24   82.88    7.79
  -8   1 -24   69.20    9.16
  -7  -1 -24   76.62    9.78
   8  -1  27  548.17   25.57
   7   1  27  504.05   23.36
  -1   8 -27  716.04   33.37
   1   7 -27  782.27   34.55
   8  -7 -27  666.26   27.98
   8  -7 -27  694.53   26.76
   7  -8 -27  651.98   24.45
  -7  -1 -27  673.49   28.06
  -8   1 -27  531.14   23.94
  -7  -1 -27  664.87   29.68
   8  -1  30  223.15   17.08
   7   1  30  192.59   14.59
   1   7 -30  293.89   21.74
  -1   8 -30  273.04   21.03
   8  -7 -30  268.70   17.96
   8  -7 -30  287.27   17.51
   7  -8 -30  274.42   16.29
  -7  -1 -30  287.67   18.49
  -8   1 -30  215.83   14.86
  -7  -1 -30  268.12   18.62
  -7  -1 -33   43.66    7.37
   8  -1  33   49.83    8.30
   7   1  33   36.88    6.80
  -1   8 -33   40.18    8.51
   1   7 -33   54.20    9.56
   8  -7 -33   39.86    6.27
   7  -8 -33   40.30    6.58
   8  -7 -33   53.11    8.00
  -8   1 -33   30.56    5.69
  -7  -1 -33   34.76    6.03
   8  -1  36   27.36    5.21
   7   1  36   24.15    4.77
  -7  -1 -36   34.97    6.38
  -1   8 -36   26.16    6.32
   1   7 -36   32.18    7.67
   8  -7 -36   32.22    5.76
   7  -8 -36   31.47    5.26
  -8   1 -36   23.33    4.82
  -7  -1 -36   28.39    5.53
   8  -1  39  293.24   21.23
   7   1  39  243.56   17.86
   1   7 -39  339.51   25.41
  -1   8 -39  280.55   21.52
   8  -7 -39  301.38   19.12
   7  -8 -39  297.74   18.39
  -8   1 -39  209.86   14.35
  -7  -1 -39  255.63   16.59
   8  -1  42  534.16   28.87
   7   1  42  466.85   25.55
   1   7 -42  567.01   32.82
  -1   8 -42  502.24   29.04
   8  -7 -42  497.36   24.89
   7  -8 -42  459.92   23.65
  -8   1 -42  337.04   17.82
  -7  -1 -42  387.97   20.22
   8  -1  45  168.10   16.84
   7   1  45  156.84   14.91
  -1   8 -45  157.54   16.05
   1   7 -45  181.29   18.76
   8  -7 -45  152.40   14.18
   7  -8 -45  147.98   13.62
  -7  -1 -45  123.74   11.13
   8  -1  48   35.77    8.17
   7   1  48   30.99    6.04
  -1   8 -48   29.76    7.27
   1   7 -48   31.14    8.07
   8  -7 -48   22.98    5.85
   7  -8 -48   24.10    4.75
  -7  -1 -48   21.16    4.52
   7   1  51   50.14    9.09
   8  -1  51   54.10    9.85
   8  -7 -51   46.90    8.76
   7  -8 -51   53.39    8.75
  -1   8 -51   32.15    6.61
   1   7 -51   44.18    8.70
   8  -1  54  163.52   17.06
   7  -8 -54  130.73   13.84
  -8   1 -54   87.94    9.92
  -7  -1 -54   82.72    9.25
   8  -7 -54  124.67   13.48
  -1   8 -54  132.39   15.28
   1   7 -54  130.39   15.67
   8  -1  57  242.91   21.43
  -8   1 -57  137.16   11.98
  -7  -1 -57  139.09   12.57
   8  -7 -57  202.98   17.54
   7  -8 -57  198.00   17.33
  -1   8 -57  175.90   18.16
   1   7 -57  182.20   18.66
  -8   1 -60   13.88    1.95
  -7  -1 -60   18.52    3.11
   8   0 -58   -0.15    3.29
  -8   8 -58   13.25    9.14
   8   0 -55    1.21    2.37
   0  -8 -55   -4.55    5.57
  -8   8 -55   -1.52    5.71
  -8   0  52   32.65    8.06
   8   0 -52   24.58    6.87
   0  -8 -52   33.31    6.60
  -8   8 -52   14.17    6.17
  -8   0  49   -1.62    4.53
   8   0 -49   -1.25    3.60
   0  -8 -49   -0.15    1.59
  -8   8 -49    2.31    4.93
  -8   0  46  112.02   12.76
   0  -8 -46  112.15   12.75
   8   0 -46  112.82   12.81
  -8   8 -46   94.27   13.99
  -8   0  43    1.89    1.54
   0  -8 -43   -1.40    1.34
  -8   8 -43    0.01    1.27
   8   0 -43    1.05    0.31
  -8   0  40  225.43   17.91
  -8   8 -40  230.67   21.57
   8   0 -40  225.43   18.27
   0  -8 -40  236.72   18.26
   0  -8 -40  234.08   16.08
   0  -8 -40  240.22   16.45
   0  -8 -37    0.30    3.38
  -8   0  37    0.37    1.52
  -8   8 -37    3.14    4.23
   8   0 -37    5.10    1.05
   0  -8 -37   -2.56    3.94
   0  -8 -37    2.30    2.06
  -8   0  34  146.78   14.31
  -8   8 -34  165.42   18.07
   0  -8 -34  158.85   14.63
   0  -8 -34  160.27   13.22
   0  -8 -34  144.32   13.00
   0  -8 -31    2.86    2.68
  -8   0  31    4.42    2.98
  -8   8 -31    0.71    1.14
   8   0 -31    1.50    2.50
   0   8  28   80.78    9.13
  -8   8 -28   83.14   12.48
   8   0 -28   86.49   11.86
   0  -8 -28   88.05   10.03
  -8   0  28   85.51    9.19
   0  -8 -25    0.64    1.41
  -8   8 -25    0.72    2.31
   0   8  25    1.46    1.21
  -8   0  25    3.98    0.37
   0   8  22   49.11    7.33
  -8   8 -22   58.59   10.87
   8   0 -22   60.71   10.40
  -8   0  22   85.56    8.92
  -8   8 -19    4.07    3.21
   0   8  19    2.43    0.48
   0  -8 -19    2.87    1.95
   8   0 -19    1.42    2.50
  -8   8 -16   26.98    5.44
   0   8  16   25.10    4.84
  -8   8 -16   18.68    5.53
   0  -8 -16   29.43    6.06
   8   0 -16   23.23    6.13
   0   8  13    2.92    2.04
  -8   8 -13    0.34    2.92
   0  -8 -13    2.80    2.05
   8   0 -13    4.79    3.00
   0   8  10    9.89    2.82
  -8   8 -10   14.00    4.73
   0  -8 -10   20.41    5.00
   8   0 -10   12.14    4.24
  -8   8  -7   -0.75    1.24
   0   8   7    2.27    1.78
   0  -8  -7    1.08    0.96
   0  -8  -7    1.39    1.55
   8   0  -7    0.62    0.94
   0  -8  -4  114.70    8.35
  -8   8  -4   70.46    9.22
   0   8   4   79.08    7.98
   8   0  -4   72.05   10.86
   0  -8  -4  127.56   12.50
  -8   8  -1    3.88    2.42
   0   8   1    2.09    0.21
   0  -8  -1    1.49    0.35
   0  -8  -1    1.22    1.01
   0  -8  -1    1.73    0.50
   8   0  -1    4.65    2.20
  -8   8   2  355.89   20.03
   0  -8   2  406.99   16.89
   0   8  -2  362.37   17.10
   0   8  -2  354.54   17.40
   8   0   2  350.99   22.62
   0  -8   2  373.40   19.26
   0  -8   2  422.86   22.05
   0   8  -5    3.21    0.78
  -8   8   5    2.33    2.65
   0  -8   5    1.65    0.54
   0  -8   5    1.67    1.32
   0  -8   5    1.82    1.49
   8   0   5    3.80    1.02
  -8   8   8  416.99   23.35
   0   8  -8  418.85   20.09
   8  -8  -8  386.05   14.71
   8   0   8  396.11   23.13
   0  -8   8  429.78   21.29
   0  -8   8  444.22   21.43
   0  -8  11    0.46    1.32
   0   8 -11    2.12    2.45
  -8   8  11    0.92    2.11
   8  -8 -11    0.35    0.86
   0  -8  11    2.84    2.05
   8   0  11    0.56    1.86
   8  -8 -11    6.39    2.96
  -8   8  14  357.17   22.51
   0   8 -14  371.19   20.39
   8   0  14  371.87   21.96
   8  -8 -14  332.20   15.75
   8  -8 -14  384.69   21.77
   0  -8  14  324.80   17.25
  -8   0 -14  350.16   21.98
   0  -8  17    0.30    0.86
  -8   8  17    0.31    2.43
   0   8 -17    1.80    2.16
   8  -8 -17    0.88    1.22
  -8   0 -17    0.86    0.83
   8  -8 -17    3.81    0.65
   8   0  20   33.33    5.53
   0   8 -20   48.14    7.80
  -8   8  20   50.74    9.33
   8  -8 -20   48.82    6.36
   8  -8 -20   45.34    7.26
  -8   0 -20   46.26    7.46
   0  -8  20   43.28    5.91
   0  -8  23    0.95    0.09
   8   0  23    0.44    1.68
   0   8 -23    0.71    1.88
  -8   8  23    2.44    2.07
   8  -8 -23    1.96    0.44
   8  -8 -23    0.38    0.12
  -8   0 -23   -0.29    2.89
   0   8 -26  164.32   15.87
   8  -8 -26  158.57   12.83
   8  -8 -26  194.04   13.79
  -8   0 -26  186.70   15.66
   8   0  29   -1.46    0.51
   0   8 -29    1.07    3.44
   8  -8 -29    0.24    1.91
  -8   0 -29    3.66    0.49
   8   0  32   10.12    3.27
  -8   0 -32   14.88    3.68
   0   8 -32   20.09    5.12
   8  -8 -32   16.03    3.82
  -8   0 -32   15.58    4.67
   8   0  35    2.50    2.59
  -8   0 -35    0.74    1.69
   0   8 -35    1.47    2.24
   8  -8 -35    3.91    2.11
  -8   0 -35    4.71    1.51
   8   0  38   18.84    4.35
   0   8 -38   22.31    5.73
   8  -8 -38   22.57    5.99
  -8   0 -38   18.12    4.56
   8   0  41   -1.64    3.17
   0   8 -41    4.35    4.83
   8  -8 -41    1.65    1.76
  -8   0 -41    3.31    0.97
   8   0  44  104.03   12.56
   0   8 -44   98.66   13.40
   8  -8 -44  122.22   12.40
  -8   0 -44   96.70    9.96
   8   0  47    2.68    2.27
   0   8 -47    0.90    2.04
   8  -8 -47    3.13    1.49
  -8   0 -47   -0.61    1.48
   8   0  50   89.87   12.50
   8  -8 -50   91.38   11.50
   0   8 -50   78.30   11.46
   8   0  53   -3.24    3.97
   8  -8 -53   -2.43    1.34
   0   8 -53   -0.62    0.94
   8   0  56  247.21   20.33
   8  -8 -56  222.82   18.11
   0   8 -56  205.07   19.59
  -8   0 -59    0.46    1.35
   9  -5  59   39.20    9.16
   5   4 -59   23.95    6.26
  -9   5 -59   18.34    5.36
   5   4 -59   24.08    4.34
   5   4 -56    6.68    5.02
  -9   5 -56    0.03    3.34
  -5   9 -56    1.63    4.72
   4  -9 -56    7.31    1.18
   5   4 -56    3.14    2.55
   9  -4 -56    6.15    3.47
  -4  -5 -56    4.50    2.50
  -4  -5 -56    7.28    2.56
  -9   5 -53   98.17   13.87
  -5   9 -53  118.15   16.40
   5   4 -53  112.62   15.43
   4  -9 -53   85.90   10.77
  -4  -5 -53   75.44    9.55
   5   4 -53  104.94   12.56
   9  -4 -53  103.67   12.85
  -4  -5 -53   80.60    8.94
   5   4 -50   19.75    7.14
  -5   9 -50   23.37    7.56
  -9   5 -50   15.91    2.75
  -4  -5 -50   16.50    4.88
   4  -9 -50   15.52    4.31
   5   4 -50   16.01    4.47
   9  -4 -50   21.24    5.59
  -4  -5 -50   16.09    4.18
   5   4 -47  422.05   28.56
  -5   9 -47  426.83   30.52
  -9   5 -47  399.63   28.10
   4  -9 -47  363.79   22.27
   9  -4 -47  394.69   23.68
  -4  -5 -47  337.97   19.09
   5   4 -44  486.41   29.53
  -5   9 -44  491.89   31.89
  -9   5 -44  432.03   28.92
   4  -9 -44  442.59   23.86
   9  -4 -44  457.25   24.89
  -4  -5 -44  429.66   22.31
  -5  -4  41   30.05    6.01
  -4  -5 -41   24.60    4.74
  -9   4  41   24.86    5.60
  -5   9 -41   28.08    7.77
  -9   5 -41   19.74    5.54
   5   4 -41   27.41    6.90
   9  -4 -41   25.39    5.67
   4  -9 -41   20.32    4.12
  -4  -5 -41   21.08    4.72
  -9   4  38   83.90   10.05
  -5  -4  38   97.35   12.30
   5   4 -38  100.48   12.81
  -5   9 -38  104.57   14.86
  -9   5 -38   86.91   12.17
   9  -4 -38  101.91   12.97
   4  -9 -38   90.12   10.22
   9  -4 -38   89.27   10.54
  -4  -5 -38  108.59   12.19
  -4  -5 -38   91.29   10.87
  -5  -4  35   42.90    6.84
  -4  -5 -35   48.89    8.61
  -9   4  35   36.02    5.06
  -9   5 -35   41.66    8.23
   5   4 -35   47.48    9.00
  -5   9 -35   37.38    8.38
   9  -4 -35   45.43    8.86
   4  -9 -35   43.61    7.04
   9  -4 -35   39.57    6.40
  -4  -5 -35   44.82    7.35
  -5  -4  32  460.51   25.28
  -5   9 -32  485.23   30.38
  -9   5 -32  478.33   27.63
   5   4 -32  549.96   28.37
   9  -4 -32  499.56   28.05
   4  -9 -32  456.79   22.13
   9  -4 -32  460.53   23.60
  -4  -5 -32  483.74   24.95
  -4  -5 -32  563.90   29.68
   4  -9 -29 1017.74   33.07
  -5  -4  29  987.49   36.41
  -5   9 -29 1062.27   43.30
  -9   5 -29  992.30   38.50
   5   4 -29 1157.42   39.98
   4  -9 -29 1003.78   32.11
   9  -4 -29 1052.27   39.79
   9  -4 -29 1023.14   34.55
  -4  -5 -29 1074.57   38.45
  -5  -4  29 1007.09   34.43
  -4  -5 -29 1196.51   43.29
  -5  -4  26   15.64    4.85
  -5  -4  26   18.68    4.75
  -4  -5 -26   20.11    3.85
   4  -9 -26   21.07    4.10
   5   4 -26   13.79    4.28
  -5   9 -26   11.13    3.50
  -9   5 -26   10.01    2.90
  -4   9  26    9.91    2.45
   4  -9 -26   18.53    4.55
   9  -4 -26   19.13    4.87
  -5  -4  26   20.35    4.48
   9  -4 -26   10.92    2.37
   4  -9 -23  388.62   20.32
  -4   9  23  408.59   23.09
  -5  -4  23  375.41   21.68
  -9   5 -23  381.06   22.44
  -5   9 -23  437.44   26.66
   5   4 -23  471.60   23.70
   4  -9 -23  396.21   18.99
   9  -4 -23  403.83   21.45
   9  -4 -23  416.85   24.99
  -5  -4  23  380.02   21.33
  -4  -5 -23  454.24   27.14
  -5  -4  23  371.04   19.99
  -5  -4  20   12.30    2.60
   4  -9 -20   14.32    3.92
  -4  -5 -20   15.54    4.44
  -5  -4  20    8.68    0.48
   5   4 -20   15.57    4.61
  -5   9 -20   12.11    3.94
  -9   5 -20    9.82    2.83
  -4   9  20   11.52    3.63
   9  -4 -20   10.74    2.68
   4  -9 -20   15.18    3.13
   9  -4 -20   12.77    4.22
  -5  -4  20   11.32    3.10
  -4   9  17  148.52   13.67
  -5  -4  17  138.03   12.30
   4  -9 -17  146.74   12.23
  -9   5 -17  145.07   12.85
   5   4 -17  169.87   12.99
  -5   9 -17  149.57   14.80
   4  -9 -17  151.39   10.56
   9  -4 -17  151.60   15.32
  -4  -5 -17  151.39   15.41
  -5  -4  17  143.02   13.74
  -5  -4  17  135.51   11.55
   4  -9 -14  375.93   20.24
  -4   9  14  391.98   22.14
  -9   5 -14  380.46   20.59
  -5   9 -14  367.14   22.04
   5   4 -14  418.51   18.53
  -9   5 -14  366.84   18.77
  -5   9 -14  374.40   22.71
   5   4 -14  405.20   22.35
   9  -4 -14  380.47   24.43
   4  -9 -14  380.07   16.38
   4   5  14  428.84   17.67
  -5  -4  14  370.18   22.66
  -4  -5 -14  382.29   24.34
  -5  -4  14  341.53   18.94
  -4   9  11  662.76   28.19
  -9   5 -11  655.16   25.10
  -9   4  11  602.35   25.98
   4  -9 -11  618.86   25.53
   5   4 -11  677.04   21.36
  -5   9 -11  645.16   28.36
   5   4 -11  647.68   27.51
   9  -4 -11  596.22   30.66
   4  -9 -11  673.11   20.52
   4   5  11  666.81   22.20
  -5  -4  11  636.67   30.49
  -9   4  11  535.76   17.28
  -4  -5 -11  672.73   31.77
  -5  -4  11  648.65   26.73
   9  -5   8  144.41   12.58
  -9   4   8  120.51   10.90
  -5   9  -8  133.98   12.81
  -9   5  -8  130.63   11.28
  -4   9   8  127.27   12.21
   4  -9  -8  148.27   12.49
   5   4  -8  137.16   12.49
   4  -9  -8  147.91    9.19
   4   5   8  130.19   10.09
   9  -4  -8  121.70   13.55
  -9   5  -8  145.13   11.49
  -4  -5  -8  150.41   15.24
  -9   4   8  120.70    8.51
  -5  -4   8  139.76   15.17
   4  -9  -8  148.78   10.40
   9  -4  -5  991.43   33.67
  -9   5  -5  831.88   27.52
   9  -5   5  719.26   25.63
   4  -9  -5  755.19   27.83
  -9   4   5  866.40   28.49
  -4   9   5  832.62   30.66
  -5   9  -5  815.84   31.17
   5   4  -5  837.54   29.46
   4   5   5  844.85   25.97
   4  -9  -5  854.73   20.28
   9  -4  -5  818.37   35.43
  -9   5  -5  807.43   25.65
  -5  -4   5  874.72   37.57
  -4  -5  -5  793.11   33.81
  -9   4   5  728.35   22.68
   4  -9  -5  782.92   24.00
   9  -5   2  314.71   16.48
  -5   9  -2  352.55   19.87
   9  -4  -2  452.20   24.48
  -9   5  -2  355.58   17.45
   4  -9  -2  369.04   19.22
  -4   9   2  361.18   20.07
  -9   4   2  346.98   16.85
   9  -4  -2  323.19   22.07
   4   5   2  357.84   17.33
   4  -9  -2  408.87   12.81
   5   4  -2  367.92   19.41
  -9   5  -2  375.12   16.90
  -9   4   2  376.12   17.73
  -4  -5  -2  369.24   23.10
  -5  -4   2  429.06   27.18
   4  -9  -2  357.33   16.48
   9  -4   1  796.71   30.57
   4  -9   1  662.12   25.67
  -9   4  -1  699.83   23.36
   9  -5  -1  715.32   25.72
  -4   9  -1  714.62   28.29
  -5   9   1  715.60   28.72
  -9   5   1  720.07   25.29
   4   5  -1  729.28   25.48
   4  -9   1  758.94   15.54
   5   4   1  751.59   27.52
   9  -4   1  696.84   32.38
   5  -9  -1  719.20   14.87
  -9   5   1  719.03   22.46
  -9   4  -1  725.18   25.93
  -4  -5   1  705.94   31.35
  -4   9  -4 1670.70   43.78
  -9   4  -4 1655.76   36.32
  -5   9   4 1640.47   43.98
   4  -9   4 1581.86   39.72
   9  -4   4 1448.64   36.88
  -9   5   4 1676.12   40.42
   5  -9  -4 1661.98   25.97
   4   5  -4 1675.57   40.10
   9  -5  -4 1684.95   49.65
   5   4   4 1781.74   41.99
  -9   5   4 1803.29   33.56
  -4  -5   4 1604.14   46.68
   5  -9  -4 1654.70   33.59
  -9   4  -4 1780.10   42.86
  -9   5   7   74.06    8.79
   9  -4   7   60.20    7.31
   9  -5  -7   97.02   10.55
  -5   9   7   81.64    9.89
  -4   9  -7   71.65    9.31
  -9   4  -7   69.74    7.71
   4   5  -7   72.77    6.21
   4   5  -7   77.10    9.03
   5  -9  -7   78.87    6.30
   5   4   7   70.52    8.51
   9  -5  -7   79.49   11.23
   5  -9  -7   79.33    6.97
  -9   5   7   89.03    7.11
  -5  -4  -7   97.32   13.30
  -9   4  -7   86.20    9.55
  -4  -5   7   72.69    9.82
  -4  -5   7   77.19    8.71
  -5   9  10  230.15   17.06
   9  -4  10  181.93   13.19
  -9   4 -10  210.86   13.52
  -9   5  10  188.98   15.00
   4   5 -10  214.71   11.53
  -4   9 -10  208.52   16.01
  -4   9 -10  204.54   16.03
   5  -9 -10  206.70   10.87
   9  -5 -10  197.01   17.53
   5   4  10  237.62   15.34
  -9   5  10  236.05   10.51
  -9   4 -10  240.30   17.17
  -5  -4 -10  222.53   19.23
  -4  -5  10  209.03   14.36
  -4  -5  10  190.59   15.67
  -9   5  13  264.53   18.45
  -4  -5  13  274.44   17.48
   9  -4  13  253.52   16.21
  -5   9  13  291.45   19.72
  -9   4 -13  293.59   17.33
  -4   9 -13  292.31   19.34
   4   5 -13  292.57   14.64
  -4   9 -13  284.55   18.88
   5  -9 -13  278.32   13.49
   9  -5 -13  276.44   20.61
   5   4  13  341.05   18.09
  -9   4 -13  316.99   20.30
  -5  -4 -13  287.28   21.05
  -4  -5  13  265.89   18.23
  -4  -5  13  286.45   17.09
   9  -4  16  329.24   19.49
  -4  -5  16  322.54   18.99
  -5   9  16  351.61   21.53
  -9   4 -16  340.48   18.79
  -4   9 -16  356.89   21.86
   4   5 -16  347.00   17.01
   9  -5 -16  327.47   22.01
   5   4  16  394.11   19.31
   5  -9 -16  337.21   15.69
  -9   4 -16  394.02   23.43
  -4  -5  16  316.07   19.82
  -5  -4 -16  342.03   22.32
  -4  -5  16  313.70   18.31
   9  -4  19 1398.48   42.92
  -5   9  19 1397.07   43.24
  -4  -5  19 1272.77   38.56
  -4   9 -19 1368.69   44.03
  -9   4 -19 1245.70   36.92
   4   5 -19 1360.24   35.55
   5  -9 -19 1341.73   32.72
   5   4  19 1515.54   37.50
   9  -5 -19 1324.29   36.34
   9  -5 -19 1275.85   43.02
  -4  -5  19 1270.90   36.99
  -9   4 -19 1540.81   46.30
  -4  -5  19 1256.36   38.28
  -5  -4 -19 1259.83   42.12
  -4  -5  22   72.77    9.44
  -5   9  22   58.23    9.06
   9  -4  22   70.35    9.64
   4   5 -22   64.38    7.84
  -9   4 -22   57.71    7.82
  -4   9 -22   62.94    9.43
   5  -9 -22   67.97    7.54
   9  -5 -22   68.95    8.74
   9  -5 -22   62.62    9.61
  -4  -5  22   67.64    8.70
  -9   4 -22   80.02   11.02
  -4  -5  22   65.53    8.34
  -5  -4 -22   61.17    9.18
  -4  -5  25  150.64   13.95
  -5   9  25  181.93   16.49
   9  -4  25  186.36   17.65
  -4   9 -25  168.38   16.57
  -9   4 -25  151.49   14.27
   4   5 -25  152.26   12.99
   5  -9 -25  157.63   11.83
   9  -5 -25  150.53   14.81
   9  -5 -25  157.70   13.49
  -9   4 -25  167.80   15.26
  -4  -5  25  148.88   13.59
  -4  -5  25  144.23   12.26
  -5  -4 -25  141.80   13.53
  -5  -4 -28    8.90    3.21
   9  -4  28   12.04    3.20
  -4  -5  28   10.10    3.17
   4   5 -28   10.30    2.50
  -4   9 -28   11.78    4.40
  -5   9  28    9.02    4.45
  -9   4 -28    9.70    3.79
   5  -9 -28   12.65    4.14
   9  -5 -28   13.24    4.37
  -5  -4 -28   20.69    5.74
   9  -5 -28   12.61    5.07
  -4  -5  31    8.55    2.25
  -5  -4 -31   11.13    3.14
   9  -4  31   15.22    3.81
   4   5 -31   10.78    3.49
  -9   4 -31   12.13    5.07
  -4   9 -31    8.67    2.57
   9  -5 -31   13.74    5.52
   9  -5 -31   11.59    3.06
   5  -9 -31    8.81    0.44
  -5  -4 -31   12.11    4.02
  -4  -5  34  141.45   14.18
   9  -4  34  174.83   18.29
  -9   4 -34  124.79   14.23
  -4   9 -34  141.06   15.74
   4   5 -34  131.19   13.63
   5  -9 -34  124.13   11.75
   9  -5 -34  151.26   15.41
   9  -5 -34  129.71   12.52
  -5  -4 -34  137.52   13.59
  -5  -4 -34  121.27   11.94
  -4  -5  37  516.35   28.22
  -4   9 -37  526.28   32.23
   4   5 -37  485.02   26.52
  -9   4 -37  444.49   26.52
   9  -5 -37  508.03   28.85
   5  -9 -37  438.79   22.62
   9  -5 -37  476.28   24.46
  -5  -4 -37  486.57   25.70
  -5  -4 -37  428.58   21.87
   9  -4  40  108.88   14.89
  -4   9 -40   97.87   13.83
   4   5 -40   98.68   12.29
  -9   4 -40   85.68   11.52
   9  -5 -40  103.43   13.40
   5  -9 -40   86.59    9.63
   9  -5 -40   92.94   11.18
  -5  -4 -40   88.52   10.81
  -5  -4 -40   84.52    9.52
   9  -4  43  178.69   18.37
  -4   9 -43  158.79   17.37
   4   5 -43  144.10   15.44
  -9   4 -43  134.07   15.48
   5  -9 -43  139.38   12.68
   9  -5 -43  135.66   13.66
  -5  -4 -43  121.20   11.95
   9  -4  46  143.71   17.02
  -9   4 -46   93.99   12.64
  -4   9 -46  117.92   15.28
   4   5 -46  111.22   13.82
   5  -9 -46  101.88   11.10
   9  -5 -46  105.33   12.04
  -5  -4 -46   90.13    9.94
   9  -4  49  179.81   18.68
  -9   4 -49  134.51   15.49
  -4   9 -49  167.41   18.35
   4   5 -49  162.34   16.98
   5  -9 -49  146.05   14.32
   9  -5 -49  157.53   15.28
  -5  -4 -49  125.21   11.47
   9  -4  52  561.45   33.64
   4   5 -52  477.79   30.15
  -4   9 -52  452.54   30.47
   5  -9 -52  403.43   23.47
   4   5 -52  471.35   25.54
   9  -5 -52  466.79   26.29
  -5  -4 -52  305.77   19.07
  -5  -4 -52  353.03   19.08
   9  -4  55   84.81   12.92
   4   5 -55   68.90   12.34
  -4   9 -55   75.89   12.49
   5  -9 -55   65.03    9.94
   9  -5 -55   68.39    9.80
  -5  -4 -55   51.02    7.78
  -5  -4 -55   52.50    7.03
   9  -4  58   61.99   10.93
   5  -9 -58   46.42    9.27
  -5  -4 -58   39.60    6.68
   4   5 -58   56.76   10.46
   9  -4  61  105.67   14.15
  -9   6 -60    7.95    5.55
   6   3 -60   13.02    4.26
  -6   9 -57   71.15   11.25
  -9   6 -57   56.07   10.02
   3  -9 -57   53.96    8.92
   6   3 -57   63.78    9.83
   9  -3 -57   56.66    9.22
  -3  -6 -57   49.73    8.78
   6   3 -54    0.16    9.35
  -6   9 -54   21.59    7.14
  -9   6 -54    0.70    0.91
   9  -3 -54    8.63    3.24
   3  -9 -54   13.33    2.90
   6   3 -54   10.56    3.94
  -3  -6 -54    7.19    2.88
  -3  -6 -54    8.02    2.12
   6   3 -51   -2.63    7.73
  -9   6 -51    7.59    2.64
  -6   9 -51    1.07    4.42
   6   3 -51   14.52    4.70
   3  -9 -51   10.10    3.32
   9  -3 -51   13.33    4.03
  -3  -6 -51   15.01    4.20
  -9   6 -48   22.83    5.57
  -6   9 -48   28.40    7.73
   6   3 -48   26.59    5.43
  -3  -6 -48   17.63    3.99
   3  -9 -48   27.24    6.01
   6   3 -48   27.87    5.34
   9  -3 -48   20.44    4.88
  -3  -6 -48   20.03    3.80
  -6  -3  45   65.16    9.96
  -9   3  45   66.57    9.44
  -6   9 -45   58.01   10.52
   6   3 -45   63.26   11.20
  -9   6 -45   49.89    9.98
   9  -3 -45   61.24    9.36
   3  -9 -45   56.84    7.18
  -3  -6 -45   57.28    8.05
  -9   3  42   26.24    4.42
  -6  -3  42   29.14    6.42
  -3  -6 -42   43.23    8.10
   6   3 -42   23.91    7.63
  -6   9 -42   22.46    7.43
  -9   6 -42   15.61    3.46
   3  -9 -42   32.04    5.58
   9  -3 -42   22.86    5.24
  -3  -6 -42   33.00    6.22
  -6  -3  39   67.23    9.28
   3  -9 -39   66.86    8.30
  -9   3  39   63.68    9.32
  -6   9 -39   61.98   11.07
  -9   6 -39   65.42   10.13
   6   3 -39   80.85   13.15
   3  -9 -39   57.43    8.08
   9  -3 -39   62.04    8.75
  -3  -6 -39   70.95    9.93
  -3  -6 -39   63.18    8.68
   3  -9 -36  120.17   11.38
  -9   3  36   99.46   10.79
  -6  -3  36  104.55   12.36
   6   3 -36  107.30   14.10
  -6   9 -36   99.98   13.97
  -9   6 -36   91.42   12.86
   9  -3 -36  110.23   13.63
   3  -9 -36  110.20   10.92
   9  -3 -36  103.26   10.96
  -3  -6 -36  132.32   13.07
  -3  -6 -36  103.87   11.36
  -6  -3  36  104.84   11.03
  -6  -3  33   67.00    9.83
   3  -9 -33   82.01    9.19
   6   3 -33   48.90    9.31
  -6   9 -33   48.42    9.38
  -9   6 -33   46.77    9.67
   9  -3 -33   51.52    8.70
   9  -3 -33   53.55    8.02
   3  -9 -33   62.28    8.06
  -6  -3  33   70.47    9.49
  -3  -6 -33   85.25   10.50
  -3  -6 -33   53.05    7.93
  -6  -3  30  481.43   25.60
  -3   9  30  492.69   26.19
  -6   9 -30  500.36   30.15
  -9   6 -30  454.78   27.37
   6   3 -30  558.33   30.11
   9  -3 -30  495.41   27.58
   3  -9 -30  464.41   22.09
   9  -3 -30  495.82   24.90
   3  -9 -30  548.21   24.55
  -3  -6 -30  531.12   26.95
  -6  -3  30  502.54   23.19
  -3  -6 -30  520.28   26.06
  -6  -3  27  218.93   17.11
  -3   9  27  258.86   18.22
  -6   9 -27  250.24   20.89
  -9   6 -27  246.66   19.29
   6   3 -27  304.84   21.61
   9  -3 -27  253.34   17.64
   9  -3 -27  258.59   19.83
   3  -9 -27  237.33   15.18
   3  -9 -27  241.56   16.34
  -3  -6 -27  252.54   18.74
  -6  -3  27  228.88   15.14
  -3   9  24  383.90   21.73
  -6  -3  24  369.92   22.10
  -6   9 -24  434.38   26.46
  -9   6 -24  417.87   24.45
   6   3 -24  489.21   26.13
   9  -3 -24  413.94   25.16
   3  -9 -24  403.02   19.37
  -6  -3  24  386.78   20.06
   3  -9 -24  423.14   21.66
  -3  -6 -24  422.95   23.86
  -3   9  21   74.68    9.45
  -6   9 -21   81.66   11.10
  -9   6 -21   81.04   10.84
   6   3 -21   86.56   10.32
   6   3 -21   86.19   11.43
   9  -3 -21   76.65   11.05
   3  -9 -21   82.38    8.61
   3  -9 -21   87.15    9.74
  -3  -6 -21   86.62   10.69
  -6  -3  21   79.74    8.80
  -3   9  18  100.50   10.91
  -9   6 -18   93.26   11.50
  -6   9 -18   96.92   11.84
   6   3 -18  100.73   10.22
   6   3 -18   91.12   11.03
   9  -3 -18   92.24   12.17
   3  -9 -18   90.27    8.31
  -3  -6 -18   86.78   10.73
  -6  -3  18   86.40   10.49
   3  -9 -18   84.24    9.69
  -3   9  15  142.37   13.16
  -9   6 -15  127.18   12.66
  -6   9 -15  137.39   13.72
  -9   6 -15  118.72   11.99
   6   3 -15  122.41   10.49
  -6   9 -15  128.23   13.48
   3  -9 -15  166.62   11.25
   6   3 -15  126.07   13.35
   9  -3 -15  128.21   15.18
  -3  -6 -15  166.16   14.56
   3  -9 -15  188.82   14.51
  -6  -3  15  153.81   13.18
  -3   9  12   37.54    6.68
  -9   6 -12   32.66    6.61
  -6   9 -12   37.99    6.65
   6   3 -12   32.39    6.64
   3   6  12   41.94    5.04
   3  -9 -12   56.41    6.55
  -6  -3  12   58.32    7.75
   3  -9 -12   68.01    8.65
  -3  -6 -12   62.15   10.10
   9  -3 -12   40.10    8.00
  -3   9   9  179.89   14.01
  -6   9  -9  160.04   14.41
  -9   3   9  164.36   12.85
  -9   6  -9  173.91   13.50
   3   6   9  189.76   10.82
   9  -3  -9  162.20   16.80
   6   3  -9  190.91   15.25
   3  -9  -9  173.78   10.46
  -3  -6  -9  152.72   14.23
   3  -9  -9  150.47   12.64
  -9   6  -6   78.15    9.40
  -9   3   6   82.85    8.78
  -3   9   6   90.68    9.91
  -6   9  -6   81.49   10.50
   3   6   6  100.63    8.24
   6   3  -6   87.51   10.62
   9  -3  -6   76.83   11.35
  -3  -6  -6   96.02   10.80
   3  -9  -6  103.24   10.37
   3  -9  -6   93.26    8.99
  -3   9   3  105.07   10.86
  -6   9  -3   97.31   10.68
  -9   3   3   89.14    8.15
  -9   6  -3   89.00    9.55
   6   3  -3   95.36   10.70
   9  -3  -3   87.67   11.67
  -9   3   3  102.35    9.38
   3  -9  -3  107.81    9.99
   3  -9  -3  127.78   11.91
  -3  -6  -3  117.91   12.29
  -9   3   0   36.99    4.96
  -3  -6   0   35.54    6.96
   9  -3   0   48.34    7.79
   3  -9   0   43.55    6.40
  -9   6   0   31.48    6.17
  -6   9   0   39.98    6.98
  -3   9   0   33.72    5.84
   6   3   0   50.81    8.23
  -9   3   0   32.30    5.23
   3  -9   0   41.41    5.54
   9  -3   0   36.56    7.79
   9  -6  -3   71.86    7.67
  -3   9  -3   74.74    9.01
   9  -3   3   81.13   10.46
  -6   9   3   72.47    9.27
  -9   3  -3   71.69    6.85
  -9   6   3   63.41    8.52
   3   6  -3   49.23    4.44
   9  -3   3   58.34    8.87
   6  -9  -3   71.01    4.97
   6   3   3   73.83    9.67
  -3  -6   3   69.27    8.47
  -3  -6   3   69.82    9.42
   3  -9   3   76.01    8.68
  -9   3  -3   60.25    7.50
   3  -9   3   68.86    7.92
   9  -6  -6  192.37   13.93
   9  -3   6  117.89   11.00
  -6   9   6  137.64   13.34
  -3   9  -6  140.33   12.86
  -9   3  -6  137.87    9.62
  -9   6   6  138.15   12.52
  -3  -6   6  150.21   12.00
   3   6  -6  116.82    7.98
   9  -6  -6  132.59   13.95
   6  -9  -6  158.67    8.62
   6   3   6  135.38   13.05
   3  -9   6  161.39   12.56
  -9   3  -6  129.38   11.12
  -3  -6   6  146.78   13.35
  -3  -6   6  157.09   12.61
  -6  -3  -6  141.30   14.05
   6  -9  -6  163.22    9.77
  -3  -6   9  357.47   19.16
   9  -3   9  280.68   16.39
  -9   6   9  334.37   20.33
  -6   9   9  383.29   22.66
  -3   9  -9  356.48   20.25
   3   6  -9  316.64   13.95
  -9   3  -9  347.32   15.40
  -3   9  -9  355.72   20.24
   6   3   9  385.86   21.26
   9  -6  -9  367.39   23.64
   6  -9  -9  330.54   13.44
  -9   3  -9  306.39   17.50
  -6  -3  -9  333.17   21.27
   3  -9   9  346.61   18.42
  -3  -6   9  338.47   20.38
  -3  -6   9  349.73   19.12
   6  -9  -9  417.89   15.47
  -6   9  12  246.22   18.66
   9  -3  12  193.03   13.67
  -9   6  12  226.13   17.14
  -3  -6  12  262.79   16.51
  -9   3 -12  227.07   13.74
  -3   9 -12  239.81   16.82
   3   6 -12  221.04   12.53
   6   3  12  237.21   16.69
   9  -6 -12  258.88   19.49
   6  -9 -12  245.16   12.30
  -6  -3 -12  228.00   17.21
  -3  -6  12  250.50   17.25
  -9   3 -12  223.27   14.81
   3  -9  12  257.03   15.69
  -3  -6  12  250.54   16.39
  -3  -6  15  118.61   11.71
  -6   9  15   95.07   11.41
   9  -3  15   88.72    9.46
  -9   6  15   94.74   11.24
   3  -9  15  143.91   11.91
  -3   9 -15  105.52   11.88
  -9   3 -15   91.11    9.08
   3   6 -15   88.01    8.67
   6  -9 -15  130.32    9.65
   9  -6 -15  113.95   10.13
   9  -6 -15   91.65   11.34
   6   3  15   87.34    9.90
   6  -9 -15   89.91    8.60
  -6  -3 -15  114.50   12.35
  -9   3 -15  119.52   10.86
  -3  -6  15  120.44   11.64
  -3  -6  15  125.03   11.84
   9  -3  18  574.01   25.20
   3  -9  18  689.96   25.61
  -6   9  18  674.22   30.67
  -3  -6  18  671.66   27.11
  -3   9 -18  661.44   29.88
  -9   3 -18  566.41   23.65
   3   6 -18  623.04   23.56
   6  -9 -18  646.85   21.91
   9  -6 -18  636.43   29.99
   6   3  18  660.87   26.26
   9  -6 -18  638.51   24.59
  -6  -3 -18  637.60   29.06
  -9   3 -18  533.67   23.09
  -3  -6  18  673.71   27.37
  -3  -6  18  676.95   27.80
  -3  -6  21   63.54    8.39
  -6   9  21   83.97   11.02
   9  -3  21   71.41    9.46
  -3   9 -21   73.20   10.30
  -9   3 -21   63.22    8.26
   3   6 -21   71.28    8.26
   6  -9 -21   70.78    7.75
   9  -6 -21   66.37    8.06
   6   3  21   75.00    9.02
   9  -6 -21   74.46   10.12
  -3  -6  21   73.17    8.92
  -3  -6  21   68.33    8.27
  -6  -3 -21   62.65    9.16
  -9   3 -21   43.97    6.83
   9  -3  24  508.16   26.29
  -3  -6  24  534.40   25.23
  -6   9  24  547.26   29.04
   3   6 -24  506.16   23.48
  -3   9 -24  514.43   28.18
  -9   3 -24  450.63   22.85
   9  -6 -24  512.63   23.39
   6  -9 -24  483.14   20.41
   9  -6 -24  508.49   26.05
  -6  -3 -24  458.23   23.73
  -6  -3 -24  537.23   27.45
  -3  -6  24  511.42   22.39
  -9   3 -24  411.30   20.45
   9  -3  27  161.30   15.46
  -6   9  27  159.12   16.22
  -3  -6  27  167.93   14.45
   3   6 -27  146.01   13.38
  -3   9 -27  163.59   16.39
  -9   3 -27  135.57   13.17
   6  -9 -27  159.39   12.20
   9  -6 -27  149.51   14.23
   9  -6 -27  154.54   13.49
  -6  -3 -27  142.37   13.34
  -9   3 -27  136.33   11.90
  -6  -3 -27  142.85   14.19
  -6  -3 -30   48.28    7.33
  -3  -6  30   57.93    8.58
   9  -3  30   66.24   10.14
  -9   3 -30   50.61    8.32
   3   6 -30   60.75    8.42
  -3   9 -30   59.24    9.97
   9  -6 -30   63.36    9.38
   6  -9 -30   54.75    7.34
   9  -6 -30   53.53    7.80
  -9   3 -30   46.22    6.55
  -6  -3 -30   64.11    9.40
  -3  -6  33   11.96    4.28
  -6  -3 -33    7.18    2.10
   9  -3  33    4.94    0.85
  -3   9 -33    8.29    6.00
  -9   3 -33    6.58    0.44
   3   6 -33    9.42    3.42
   9  -6 -33    3.92    1.93
   6  -9 -33    7.07    1.50
   9  -6 -33   12.78    3.66
  -6  -3 -33    8.07    2.86
  -9   3 -33   10.58    1.81
   9  -3  36   11.41    4.07
  -6  -3 -36   13.72    3.33
  -3   9 -36    6.84    1.64
   3   6 -36   11.29    4.40
  -9   3 -36    8.45    3.64
   9  -6 -36   16.40    6.04
   6  -9 -36   14.74    4.08
   9  -6 -36   11.32    3.49
  -6  -3 -36   12.98    4.10
   9  -3  39   59.82   10.41
  -6  -3 -39   39.00    6.28
  -3   9 -39   44.30    9.17
   3   6 -39   48.15    7.95
   6  -9 -39   43.65    6.72
   9  -6 -39   48.81    8.01
   9  -6 -39   47.89    7.32
  -6  -3 -39   46.01    7.89
   9  -3  42   64.82   10.56
   3   6 -42   51.03    8.66
  -3   9 -42   40.57    9.04
   6  -9 -42   53.55    7.75
   9  -6 -42   53.90    8.81
  -6  -3 -42   45.64    7.63
   9  -3  45   36.46    8.30
   3   6 -45   24.50    6.60
  -3   9 -45   25.19    7.22
   6  -9 -45   34.39    6.48
   9  -6 -45   38.98    6.36
  -6  -3 -45   33.73    6.18
   9  -3  48   11.37    4.73
   3   6 -48   11.43    3.96
  -3   9 -48   10.32    4.69
   6  -9 -48    8.47    1.77
   9  -6 -48   14.54    5.38
  -6  -3 -48    8.95    3.39
   9  -3  51    2.81    4.51
   3   6 -51    5.02    0.87
  -3   9 -51    4.85    2.20
  -9   3 -51    1.32    2.67
   6  -9 -51    7.11    2.55
   9  -6 -51    7.79    3.26
  -6  -3 -51    4.66    2.04
   9  -3  54   32.37    7.50
  -3   9 -54   29.38    7.87
   3   6 -54   25.94    6.47
  -6  -3 -54   18.34    4.64
   6  -9 -54   19.99    5.85
   9  -6 -54   25.60    5.46
  -6  -3 -54   14.70    3.50
   9  -3  57   53.90   10.26
   9  -6 -57   50.20    9.36
   6  -9 -57   38.51    7.31
  -6  -3 -57   27.77    5.47
   3   6 -57   43.83    9.42
  -3   9 -57   38.70    8.46
   9  -3  60  151.34   17.25
  -9   7 -58    3.73    1.42
   7   2 -58   -0.79    1.42
  -7   9 -55    6.94    2.33
  -9   7 -55    6.17    2.21
   9  -2 -55    8.48    1.38
   7   2 -55    8.43    2.89
   2  -9 -55    9.73    3.77
  -2  -7 -55    8.75    4.02
  -7   9 -52  484.63   33.12
  -9   7 -52  472.95   31.99
   2  -9 -52  442.80   25.46
   9  -2 -52  445.94   25.94
   7   2 -52  485.54   28.32
  -2  -7 -52  419.59   25.92
  -9   2  49   69.44    9.41
  -7  -2  49   71.65   10.28
  -7   9 -49   60.09   11.49
  -9   7 -49   75.93   12.00
   2  -9 -49   78.93   10.40
   7   2 -49   68.43   10.49
   9  -2 -49   74.80   10.67
  -2  -7 -49   79.70   10.79
  -2  -7 -49   67.96    8.46
  -9   2  46   12.19    4.48
  -7  -2  46    8.63    3.26
  -7   9 -46    5.05    2.27
  -9   7 -46    6.64    3.67
   2  -9 -46    6.30    2.02
   7   2 -46    9.34    3.63
   9  -2 -46    5.99    3.33
  -2  -7 -46    8.33    3.58
  -2  -7 -46    9.08    3.39
  -9   2  43  254.89   18.52
  -7  -2  43  257.73   19.86
   2  -9 -43  281.26   17.54
  -9   7 -43  241.98   22.10
  -7   9 -43  283.36   24.69
   2  -9 -43  250.92   17.93
   9  -2 -43  243.26   18.62
  -2  -7 -43  254.41   20.17
  -2  -7 -43  254.88   17.38
  -2  -7 -43  303.41   19.87
  -9   2  40   90.64   11.59
  -7  -2  40   83.09   10.99
  -9   7 -40   89.68   13.35
  -7   9 -40   96.66   14.70
   9  -2 -40   78.89   10.47
   2  -9 -40   73.01    9.11
  -2  -7 -40   86.14   10.70
   2  -9 -40   81.22    9.58
  -2  -7 -40   87.81   10.56
  -9   2  37  101.08   11.55
  -7  -2  37  106.92   12.47
  -7   9 -37  123.03   15.00
  -9   7 -37  107.51   14.38
   9  -2 -37  119.16   15.01
   9  -2 -37  106.84   12.05
   2  -9 -37  106.27   11.13
   2  -9 -37  114.66   11.16
  -2  -7 -37  121.54   12.13
  -2  -7 -37  117.90   12.29
  -7  -2  37  105.71    9.90
  -7  -2  34  257.03   18.91
  -9   2  34  244.03   17.61
  -7   9 -34  265.70   22.79
  -9   7 -34  264.72   21.62
   9  -2 -34  258.79   21.86
   2  -9 -34  263.26   16.99
   9  -2 -34  272.85   19.47
  -2  -7 -34  272.86   18.12
  -2  -7 -34  295.03   19.65
  -7  -2  34  272.88   16.71
   2  -9 -34  285.80   17.86
  -7  -2  31    9.79    3.54
  -2  -7 -31    6.36    2.06
   2  -9 -31    5.57    1.10
  -2   9  31    9.06    3.52
  -7   9 -31    4.96    3.89
  -9   7 -31    8.32    3.29
   9  -2 -31    8.61    4.12
   9  -2 -31    8.11    3.46
   2  -9 -31    6.34    2.77
  -7  -2  31    8.45    0.28
  -2  -7 -31    8.28    3.62
  -2  -7 -28   47.87    7.49
  -7  -2  28   43.52    7.00
   2  -9 -28   55.33    7.78
  -2   9  28   51.17    7.67
  -9   7 -28   57.85    9.81
  -7   9 -28   57.94    9.38
   9  -2 -28   51.98    9.38
   2  -9 -28   45.99    6.55
  -7  -2  28   51.59    7.49
  -2   9  25  231.69   16.22
  -7   9 -25  264.38   20.97
  -9   7 -25  259.76   20.32
   7   2 -25  251.24   20.23
   9  -2 -25  247.59   19.69
   2  -9 -25  277.04   16.47
   2  -9 -25  314.30   19.11
  -2  -7 -25  294.65   19.12
  -7  -2  25  275.95   16.95
  -2  -7 -22   15.15    4.42
   2  -9 -22   18.52    3.61
  -2   9  22   18.54    4.42
  -7   9 -22   22.89    6.34
  -9   7 -22   19.57    5.51
   2  -9 -22   25.74    5.21
   7   2 -22   21.09    5.76
  -7  -2  22   16.68    4.42
   9  -2 -22   22.12    6.53
  -2   9  19  400.96   21.16
  -9   7 -19  388.22   23.43
  -7   9 -19  409.16   24.93
   7   2 -19  395.78   24.22
   9  -2 -19  394.89   24.70
  -2  -7 -19  414.60   22.73
   2  -9 -19  461.48   22.97
  -7  -2  19  427.36   21.44
  -2   9  16 1320.70   37.46
  -9   7 -16 1281.53   41.85
  -7   9 -16 1294.23   43.09
  -9   7 -16 1339.29   40.54
  -7   9 -16 1340.01   42.92
   7   2 -16 1279.19   42.69
   9  -2 -16 1308.49   45.39
  -2  -7 -16 1298.17   40.48
   2  -9 -16 1370.20   39.89
  -7  -2  16 1405.98   39.57
  -2   9  13  213.57   14.80
   2   7  13  203.83   11.24
  -9   7 -13  210.50   15.95
  -7   9 -13  203.78   16.69
   7   2 -13  207.01   16.94
   9  -2 -13  200.38   18.51
  -2  -7 -13  219.80   16.76
   2  -9 -13  242.83   16.77
  -2   9  10   73.35    8.65
   2   7  10   72.64    6.75
  -7   9 -10   69.50    9.85
  -9   7 -10   70.66    9.28
   9  -2 -10   64.82   10.89
   7   2 -10   69.35   10.17
   2  -9 -10   95.73   10.46
  -2  -7 -10   90.44   10.62
  -7   9  -7   43.52    7.57
  -9   2   7   40.49    5.84
  -9   7  -7   46.30    7.50
  -2   9   7   47.53    7.09
  -2  -7  -7   47.61    7.90
   2   7   7   44.24    5.21
   2  -9  -7   53.88    7.81
   7   2  -7   43.62    8.08
   9  -2  -7   45.09    8.82
  -7   9  -4 1193.90   38.12
  -2  -7  -4 1348.73   32.77
  -9   2   4 1308.65   30.53
  -9   7  -4 1205.35   35.83
  -2   9   4 1243.35   35.37
   2   7   4 1186.71   27.20
   9  -2  -4 1182.32   43.43
   7   2  -4 1256.74   41.44
  -2  -7  -4 1216.19   38.87
   2  -9  -4 1251.82   37.55
   2  -9  -4 1226.14   34.02
  -9   2   1  314.77   13.41
  -2  -7  -1  347.34   16.69
  -9   7  -1  302.63   18.14
  -2   9   1  324.91   18.24
  -7   9  -1  324.94   19.60
   2   7   1  332.57   14.11
   9  -2  -1  289.28   21.30
   7   2  -1  331.10   21.54
  -2  -7  -1  327.75   19.98
   2  -9  -1  351.37   19.60
   2  -9  -1  309.85   16.56
  -2  -7   2  123.34   10.18
  -2   9  -2  125.15   11.43
  -9   7   2  117.76   11.55
  -7   9   2  128.30   12.56
  -9   2  -2  130.16    8.42
   2   7  -2  132.21    9.41
   9  -2   2  106.84   12.88
   7   2   2  115.63   13.29
   2  -9   2  125.95   11.71
  -2  -7   2  122.93   11.47
  -2  -7   2  124.86   12.44
   2  -9   2  110.25    9.91
  -2   9  -5  710.40   27.88
  -7   9   5  681.34   29.65
  -2  -7   5  693.25   24.56
  -9   2  -5  667.65   18.80
  -9   7   5  669.33   27.95
   2   7  -5  577.42   19.25
   7   2   5  627.24   29.54
   9  -2   5  584.63   29.26
   7  -9  -5  660.62   16.89
  -2  -7   5  688.23   27.19
  -9   2  -5  633.61   26.96
  -2  -7   5  709.21   29.60
   2  -9   5  708.11   27.20
   2  -9   5  684.05   25.61
   9  -2   8  207.42   15.90
  -7   9   8  225.70   17.64
   9  -7  -8  247.13   14.20
  -9   7   8  201.35   15.92
  -2  -7   8  197.38   13.37
  -2   9  -8  207.02   15.12
   2   7  -8  175.49   10.78
  -9   2  -8  184.88    9.45
  -2   9  -8  210.50   15.21
   7   2   8  210.44   16.73
   9  -7  -8  218.52   18.32
   9  -2   8  190.67   16.77
   7  -9  -8  190.01   10.20
  -2  -7   8  211.62   15.13
  -2  -7   8  209.73   15.97
  -9   2  -8  165.90   13.45
   2  -9   8  189.68   14.11
  -9   7  11   55.06    8.43
  -2  -7  11   61.38    7.56
   9  -2  11   51.43    7.74
  -9   2 -11   52.60    5.87
  -2   9 -11   62.72    8.65
  -7   9  11   54.29    8.54
   2   7 -11   53.12    6.42
   7   2  11   53.72    8.36
   9  -7 -11   63.06    6.97
   7  -9 -11   68.38    6.42
  -9   2 -11   60.72    8.21
   2  -9  11   74.89    8.82
   9  -7 -11   55.80    8.95
  -2  -7  11   69.27    9.31
  -2  -7  11   67.96    8.77
  -7   9  14  422.55   24.01
   9  -2  14  299.45   17.15
  -2  -7  14  420.45   20.48
  -9   7  14  373.60   22.94
  -2   9 -14  416.36   22.57
  -9   2 -14  343.99   16.08
   2   7 -14  406.20   19.39
   7  -9 -14  435.41   21.15
   9  -7 -14  410.79   23.97
   9  -7 -14  413.94   18.44
   7   2  14  373.42   21.58
   7  -9 -14  432.18   17.21
   2  -9  14  440.04   20.70
  -9   2 -14  398.62   21.73
  -2  -7  14  441.72   22.21
  -2  -7  14  438.35   22.35
  -7  -2 -17   13.66    4.10
  -2  -7  17   15.28    3.59
   9  -2  17   14.20    3.66
   2  -9  17   19.87    4.37
  -2  -7  17   18.39    4.36
   2   7 -17   19.13    5.21
  -2   9 -17   20.17    4.92
  -7   9  17   22.14    6.06
  -9   2 -17   15.47    3.57
  -9   7  17   17.06    5.53
   7  -9 -17   16.05    3.72
   9  -7 -17   15.70    3.69
   7   2  17   14.84    2.73
  -2  -7  17   19.80    4.91
   9  -7 -17   20.12    5.43
   7  -9 -17   16.44    3.77
  -9   2 -17   12.44    4.24
   9  -2  20   93.25   10.10
  -9   7  20  120.84   14.24
  -7   9  20  125.94   14.04
  -2  -7  20  113.16   11.14
  -2   9 -20  127.13   13.55
   2   7 -20  120.08   11.12
   9  -7 -20  117.82   12.73
   7   2  20  116.28   11.90
   7  -9 -20  132.39   11.03
   9  -7 -20  113.66   10.39
   7  -9 -20  111.11    9.41
  -2  -7  20  127.71   12.57
  -2  -7  20  110.88   10.63
  -7  -2 -20  123.05   12.47
   2  -9  20  127.07   10.74
  -9   2 -20   92.02   10.13
  -7  -2 -20  113.12   12.76
   9  -2  23  324.09   19.43
  -7   9  23  417.49   25.98
  -2  -7  23  389.52   21.16
  -2   9 -23  387.37   24.17
   2   7 -23  381.77   21.02
   9  -7 -23  375.62   22.14
   7   2  23  330.05   18.35
   9  -7 -23  396.86   20.34
   7  -9 -23  389.99   18.48
  -2  -7  23  360.33   18.06
  -9   2 -23  301.74   17.78
  -7  -2 -23  397.76   22.68
   2  -9  23  419.30   19.72
  -7  -2 -23  388.82   23.16
  -2  -7  26   10.90    3.77
   9  -2  26    9.50    2.44
  -7  -2 -26   11.15    3.70
   2   7 -26   15.05    3.87
  -7   9  26   12.62    5.52
  -2   9 -26   15.24    3.98
   7  -9 -26   10.93    2.17
   9  -7 -26   14.19    3.67
   9  -7 -26   11.21    4.12
  -9   2 -26    9.30    2.46
  -7  -2 -26    8.08    1.70
   9  -2  29  188.40   16.14
  -2   9 -29  200.81   18.09
   2   7 -29  190.93   16.13
   9  -7 -29  193.90   15.96
   9  -7 -29  214.42   15.99
   7  -9 -29  198.65   14.20
  -9   2 -29  165.93   13.10
  -7  -2 -29  199.01   15.78
  -7  -2 -29  200.92   16.75
   9  -2  32  672.38   31.38
   2   7 -32  704.72   31.54
  -2   9 -32  731.44   35.75
   9  -7 -32  708.85   30.70
   9  -7 -32  689.64   28.64
   7  -9 -32  639.75   25.99
  -7  -2 -32  687.80   31.43
  -7  -2 -32  645.40   28.09
   9  -2  35  135.58   14.78
  -2   9 -35  136.01   15.65
   2   7 -35  123.47   13.52
   9  -7 -35  131.27   13.30
   9  -7 -35  147.51   13.44
   7  -9 -35  141.42   12.60
  -9   2 -35  114.16   10.64
  -7  -2 -35  143.89   13.55
  -7  -2 -35  135.20   12.34
   9  -2  38   33.05    7.18
  -7  -2 -38   30.47    5.27
   2   7 -38   26.05    6.12
  -2   9 -38   22.90    5.43
   7  -9 -38   27.68    5.61
   9  -7 -38   27.33    5.67
  -9   2 -38   27.57    4.57
  -7  -2 -38   28.52    5.25
   9  -2  41   56.20    9.09
   2   7 -41   67.87   10.88
  -2   9 -41   69.88   11.10
   9  -7 -41   53.86    7.91
   7  -9 -41   55.85    8.67
  -7  -2 -41   48.55    7.57
   9  -2  44  348.12   24.10
   2   7 -44  328.17   23.73
  -2   9 -44  296.26   23.12
   9  -7 -44  322.39   20.78
   7  -9 -44  293.83   19.26
  -7  -2 -44  261.53   17.20
   9  -2  47   91.71   12.73
  -2   9 -47   78.43   11.87
   2   7 -47   84.68   11.86
   9  -7 -47   77.78   10.20
   7  -9 -47   72.07    9.46
  -7  -2 -47   59.84    7.78
   9  -2  50   65.90   11.70
   2   7 -50   58.29   11.01
  -2   9 -50   48.70    9.16
   9  -7 -50   43.98    8.09
   7  -9 -50   48.90    7.92
  -7  -2 -50   34.19    5.71
   9  -2  53  124.78   15.48
  -2   9 -53  104.38   14.18
   2   7 -53  113.19   15.76
   9  -7 -53  111.71   12.62
   7  -9 -53  125.18   13.31
  -7  -2 -53   87.40    9.40
   9  -2  56   39.23    8.36
   9  -7 -56   42.73    7.86
  -7  -2 -56   25.24    5.38
   7  -9 -56   36.50    6.60
  -9   2 -56   25.62    5.20
   2   7 -56   39.32    9.45
  -2   9 -56   41.88    9.46
   9  -2  59    6.27    4.55
   8   1 -56   32.69    7.75
   9  -1 -56   25.74    5.77
   1  -9 -56   31.72    6.58
  -8   9 -56   27.50    9.55
  -9   8 -56   33.68    9.42
  -9   1  53  320.25   22.02
  -8  -1  53  317.35   22.72
   1  -9 -53  310.95   22.25
  -1  -8 -53  356.29   25.63
   8   1 -53  328.99   22.97
   9  -1 -53  305.78   21.63
  -8   9 -53  340.32   28.50
  -9   8 -53  329.54   27.01
  -8  -1  50   10.02    3.28
  -9   1  50    7.86    4.30
   9  -1 -50    6.06    2.77
   8   1 -50    6.81    1.19
   1  -9 -50    9.29    3.99
  -1  -8 -50   16.46    6.17
  -8   9 -50   16.91    5.33
  -9   8 -50    2.62    5.54
  -9   1  47   21.78    5.30
  -8  -1  47   20.86    4.75
  -8   9 -47   31.20    8.04
  -9   8 -47   18.87    5.80
   8   1 -47   21.11    5.79
   9  -1 -47   22.46    5.29
   1  -9 -47   26.81    6.24
  -1  -8 -47   28.84    5.64
  -9   1  44   58.18    8.90
  -8  -1  44   57.31    9.39
   1  -9 -44   60.37    8.21
  -8   9 -44   53.83   10.59
  -9   8 -44   51.25   10.08
   9  -1 -44   56.03    8.80
   1  -9 -44   61.75    9.17
  -1  -8 -44   62.68    9.92
  -1  -8 -44   71.65    9.42
  -9   1  41  100.15   12.06
  -8  -1  41  102.77   12.56
  -8   9 -41  130.41   16.58
  -9   8 -41  107.65   14.69
   1  -9 -41   98.69   11.01
   9  -1 -41  104.73   11.84
  -1  -8 -41  116.27   14.47
  -1  -8 -41  114.84   12.16
   1  -9 -41  107.01   10.95
  -1  -8 -41  121.66   12.33
  -9   1  38  474.69   25.91
  -8  -1  38  463.27   25.97
  -8   9 -38  522.60   32.02
  -9   8 -38  482.43   30.43
   9  -1 -38  523.01   27.67
   1  -9 -38  477.44   24.69
   1  -9 -38  525.88   25.04
  -1  -8 -38  526.10   25.41
  -1  -8 -38  516.59   24.97
  -9   1  35  489.78   25.60
  -8  -1  35  515.87   27.18
  -8   9 -35  527.97   32.47
  -9   8 -35  490.94   30.68
   9  -1 -35  517.99   30.94
   1  -9 -35  524.13   25.50
   1  -9 -35  563.20   25.81
  -1  -8 -35  563.92   26.28
  -1  -8 -35  557.95   26.05
  -1   9  32  120.75   11.96
  -8  -1  32  130.70   13.52
  -8   9 -32  152.24   17.46
  -9   8 -32  126.93   14.87
   9  -1 -32  144.40   16.29
   1  -9 -32  149.63   13.06
   1  -9 -32  149.13   13.13
   1  -9 -32  144.93   13.01
  -1  -8 -32  144.49   13.34
  -1  -8 -32  143.03   13.09
  -1   9  29   75.52    8.89
  -8  -1  29   77.80    9.98
  -8   9 -29  102.76   13.66
  -9   8 -29   75.98   11.37
   8   1 -29   74.50   11.78
   9  -1 -29   81.92   11.93
   1  -9 -29   81.32    9.79
   1  -9 -29   81.75    9.69
  -1  -8 -29   77.89    9.88
  -8  -1  29   83.66    9.20
  -1   9  26  233.87   15.81
  -8   9 -26  259.07   21.77
  -9   8 -26  252.60   20.57
   8   1 -26  256.63   21.13
   9  -1 -26  260.53   20.64
   1  -9 -26  261.26   17.74
  -1  -8 -26  251.37   17.81
  -8  -1  26  262.13   16.56
  -1   9  23  714.19   27.24
  -8   9 -23  752.34   35.27
  -9   8 -23  751.01   34.82
   8   1 -23  721.64   34.41
   9  -1 -23  779.32   34.99
   1  -9 -23  740.09   29.80
  -1  -8 -23  716.22   30.10
  -8  -1  23  776.42   28.58
  -1  -8 -20   45.03    7.34
   1  -9 -20   49.13    7.82
  -1   9  20   29.58    5.02
  -9   8 -20   32.44    6.87
  -8   9 -20   33.49    6.37
   1   8  20   30.76    5.09
   8   1 -20   28.43    6.26
   9  -1 -20   31.88    7.56
  -1   9  17  180.79   13.28
   1   8  17  177.73   11.79
  -9   8 -17  191.32   17.03
  -8   9 -17  195.10   17.56
  -8   9 -17  192.66   16.40
  -9   8 -17  183.33   16.18
   8   1 -17  188.81   17.21
   9  -1 -17  189.41   17.31
   1  -9 -17  216.02   16.03
  -1  -8 -17  215.14   16.45
  -1   9  14   21.17    4.65
   1   8  14   14.69    2.92
  -9   8 -14   15.50    4.74
  -8   9 -14   21.45    6.28
  -1  -8 -14   22.18    5.27
   1  -9 -14   25.03    5.66
   9  -1 -14   18.41    5.37
   8   1 -14   15.43    3.71
  -1   9  11    9.24    2.37
   1   8  11   14.61    3.51
  -9   8 -11   13.30    3.80
  -8   9 -11   13.54    4.82
  -1  -8 -11   13.63    3.90
   1  -9 -11   10.83    3.35
   9  -1 -11    7.72    4.11
   8   1 -11    9.68    4.84
  -1   9   8   92.60    9.22
  -1  -8  -8  125.01    9.04
   1   8   8   93.70    8.43
  -8   9  -8   87.49   10.93
  -9   8  -8   91.10   10.47
   8   1  -8   88.80   11.62
   9  -1  -8   90.78   12.26
   1  -9  -8  134.22   12.77
  -1  -8  -8  119.54   12.40
  -9   1   5 1583.05   32.28
  -1  -8  -5 1661.93   33.64
  -1   9   5 1512.99   37.76
   1   8   5 1561.41   34.68
  -9   8  -5 1486.49   41.41
  -8   9  -5 1516.00   43.16
   9  -1  -5 1500.08   50.21
   8   1  -5 1481.82   47.83
   1  -9  -5 1568.61   43.31
  -1  -8  -5 1583.74   44.78
  -1   9   2   56.41    7.22
  -1  -8  -2   51.93    7.98
  -8   9  -2   52.29    8.34
  -1  -8  -2   51.78    6.56
  -9   8  -2   48.78    7.60
   1   8   2   54.97    6.42
   1  -9  -2   51.95    7.07
   9  -1  -2   50.15    8.93
   8   1  -2   48.22    8.83
   1  -9  -2   57.22    8.62
   1   8  -1    4.03    1.79
  -9   8   1   -0.24    0.80
  -8   9   1    1.76    0.96
  -1   9  -1    4.64    3.03
   1   8  -1    1.73    1.23
  -1  -8   1    3.08    1.62
   1  -9   1    3.88    2.61
  -1  -8   1    2.73    2.36
  -1  -8   1    1.91    1.30
   1  -9   1    5.40    3.73
   9  -1   1    1.49    2.11
   8   1   1    3.99    2.34
  -1  -8   4  116.45    9.61
  -8   9   4  113.95   12.27
  -9   8   4  115.82   12.18
  -1   9  -4  114.99   10.62
   1   8  -4  111.82    9.63
  -1   9  -4  115.71   10.95
   8   1   4  106.67   12.68
   8  -9  -4  109.16    7.28
   9  -1   4   92.52   12.20
   1  -9   4  107.14   10.71
  -1  -8   4  115.40   11.86
  -1  -8   4  115.86   11.34
   1  -9   4  105.40   10.19
  -8   9   7  121.03   12.82
  -1  -8   7  126.06   10.59
  -9   8   7  107.51   12.40
  -1   9  -7  122.23   11.16
   1   8  -7  121.29   10.28
   8   1   7  110.92   12.34
   8  -9  -7  115.28    7.83
   9  -1   7   99.53   12.40
  -1  -8   7  125.69   12.21
  -1  -8   7  128.69   12.08
   1  -9   7  121.72   11.31
   1  -9   7  124.39   11.46
  -1  -8  10  842.50   27.66
  -9   8  10  807.47   32.13
  -8   9  10  835.19   33.85
  -1   9 -10  827.43   29.96
   1   8 -10  876.43   29.78
   9  -1  10  703.23   31.49
   9  -8 -10  867.14   35.28
   9  -8 -10  769.43   23.14
   8   1  10  734.76   31.39
   8  -9 -10  815.08   22.16
   1  -9  10  847.70   30.26
  -9   1 -10  826.32   33.69
   1  -9  10  819.25   29.04
  -1  -8  10  877.41   31.57
  -1  -8  10  860.74   31.22
  -9   8  13  960.66   36.05
  -8   9  13 1000.52   37.37
  -1  -8  13 1013.67   31.14
  -1   9 -13  999.97   33.82
   1   8 -13 1120.52   35.70
   8  -9 -13 1029.50   35.33
   9  -1  13  897.87   35.52
   8  -9 -13  984.32   26.14
   9  -8 -13  925.35   26.00
   8   1  13  919.49   34.44
   9  -8 -13 1027.03   38.02
   1  -9  13  952.21   30.57
  -1  -8  13  994.78   32.75
  -9   1 -13  900.23   33.83
  -1  -8  13 1026.60   34.51
  -9   8  16  133.58   13.84
   9  -1  16   96.31   10.07
  -1  -8  16  153.16   12.22
  -8   9  16  140.73   14.52
  -1   9 -16  141.98   13.60
   1   8 -16  155.17   13.80
   8   1  16  121.82   12.95
   8  -9 -16  138.40   12.53
   9  -8 -16  133.01   13.31
   9  -8 -16  146.68   11.07
   8  -9 -16  156.62   11.15
  -1  -8  16  160.63   13.93
   1  -9  16  147.81   11.87
  -1  -8  16  151.26   12.46
  -9   1 -16  147.74   14.16
  -8  -1 -16  142.65   14.29
   9  -1  19   87.02    9.46
  -9   8  19  112.63   13.72
  -8   9  19  112.25   13.27
  -1   9 -19  127.94   13.30
   1   8 -19  140.80   13.44
   9  -8 -19  119.35   12.59
   8  -9 -19  132.58   12.24
   8   1  19  125.30   13.14
   9  -8 -19  117.28   10.11
   8  -9 -19  125.17   10.20
  -1  -8  19  112.49   10.49
  -9   1 -19  107.87   12.11
   1  -9  19  122.15   10.71
  -8  -1 -19  121.38   13.28
  -9   8  22  441.45   27.04
   9  -1  22  294.60   17.81
  -8   9  22  433.20   26.30
  -1   9 -22  424.14   24.83
   1   8 -22  452.19   25.01
   8   1  22  311.08   17.24
   9  -8 -22  425.68   20.17
   8  -9 -22  438.63   19.83
   9  -8 -22  402.28   22.70
   8  -9 -22  409.00   21.07
  -9   1 -22  403.40   23.36
  -1  -8  22  395.29   18.79
  -8  -1 -22  414.85   24.13
   1  -9  22  431.47   19.79
  -8   9  25  380.73   25.87
  -1   9 -25  403.19   24.54
   1   8 -25  398.94   24.05
   9  -8 -25  383.32   19.79
   9  -8 -25  354.20   21.05
   8  -9 -25  385.61   18.90
  -8  -1 -25  430.17   24.38
  -9   1 -25  348.66   20.94
  -8  -1 -25  384.52   23.78
   9  -1  28   76.03    9.68
  -1   9 -28   96.84   12.71
   1   8 -28   92.42   11.51
   9  -8 -28   86.36   10.56
   9  -8 -28   83.22    9.28
   8  -9 -28   80.68    9.25
  -8  -1 -28   99.15   11.26
  -9   1 -28   69.03    8.87
  -8  -1 -28   82.06   10.57
   9  -1  31  113.38   11.93
   1   8 -31  161.57   15.87
  -1   9 -31  136.66   15.08
   9  -8 -31  137.15   12.30
   8  -9 -31  135.58   12.05
  -8  -1 -31  153.56   14.39
  -9   1 -31  110.47   11.38
  -8  -1 -31  128.81   13.13
  -8  -1 -34   14.45    3.60
   9  -1  34   15.49    4.56
  -1   9 -34   13.15    3.05
   1   8 -34   25.05    6.35
   9  -8 -34   14.42    3.95
   8  -9 -34   14.90    2.87
  -9   1 -34   14.48    4.13
  -8  -1 -34    9.00    1.92
  -8  -1 -37   27.61    6.12
   9  -1  37   23.24    6.39
  -1   9 -37   32.91    7.63
   1   8 -37   25.33    6.55
   9  -8 -37   25.10    5.78
   8  -9 -37   21.10    3.79
  -9   1 -37   17.12    4.51
  -8  -1 -37   21.62    5.92
   9  -1  40   69.81   10.25
   8   1  40   53.36    9.07
   1   8 -40   83.08   12.12
  -1   9 -40   68.64   10.83
   8  -9 -40   88.56   10.47
   9  -8 -40   88.51   10.32
  -9   1 -40   76.19    8.89
  -8  -1 -40   76.52    9.54
   9  -1  43  456.50   27.66
   8   1  43  402.41   24.19
   1   8 -43  472.71   30.02
  -1   9 -43  423.47   26.92
   9  -8 -43  437.25   23.65
   8  -9 -43  439.40   23.25
  -8  -1 -43  366.54   20.67
   9  -1  46   60.30   10.28
   8   1  46   52.23    8.98
   1   8 -46   53.42    9.29
  -1   9 -46   50.07    9.64
   9  -8 -46   49.63    8.42
   8  -9 -46   47.61    8.06
  -8  -1 -46   38.98    6.47
   9  -1  49    4.67    2.88
  -1   9 -49   -0.49    3.26
   1   8 -49    2.30    1.96
   9  -8 -49   -2.87    3.55
   8  -9 -49    4.49    3.57
  -8  -1 -49    3.67    2.72
   9  -1  52   40.71    8.54
  -1   9 -52   33.42    7.71
   1   8 -52   37.01    8.73
   9  -8 -52   30.27    6.17
   8  -9 -52   33.92    7.19
  -8  -1 -52   21.28    4.52
   9  -1  55   33.57    6.02
  -9   1 -55   24.19    4.73
   9  -8 -55   29.56    6.38
   8  -9 -55   35.15    7.78
   1   8 -55   24.46    7.07
  -1   9 -55   23.00    5.35
   9  -1  58  206.77   19.70
  -9   1 -58  115.09   11.15
  -9   0  54   -0.81    2.31
   9   0 -54    4.19    3.54
   0  -9 -54    1.68    0.54
  -9   9 -54    6.44    4.98
  -9   0  51   -7.20    5.43
   9   0 -51   -4.07    4.86
   0  -9 -51    4.84    3.66
  -9   9 -51    4.79    6.21
  -9   0  48   42.34    8.76
   0  -9 -48   48.76    8.83
  -9   9 -48   43.29   10.21
  -9   0  45    1.75    0.79
  -9   9 -45   -2.48    3.87
   0  -9 -45    1.15    3.14
  -9   0  42  383.44   23.45
  -9   9 -42  422.45   30.51
   0  -9 -42  421.14   24.99
   0  -9 -42  468.55   24.19
  -9   0  39    1.16    2.59
   0  -9 -39    0.00    0.85
  -9   9 -39   -1.17    0.69
   0  -9 -39   -0.18    2.49
   0  -9 -36   51.32    8.00
  -9   0  36   46.28    8.25
  -9   9 -36   68.11   11.45
   0  -9 -36   59.38    9.01
   0  -9 -36   58.81    8.26
  -9   0  33    0.76    3.02
   0  -9 -33   -0.76    3.27
  -9   9 -33    3.09    2.69
   9   0 -33   -0.03    3.01
   0  -9 -33    2.65    2.93
  -9   9 -30  132.90   16.17
   9   0 -30  147.45   16.26
   0  -9 -30  142.47   13.35
   0  -9 -27    1.72    2.28
  -9   9 -27   -1.34    4.17
   0   9  27   -0.46    1.57
   9   0 -27   -1.60    2.79
   0   9  24 1379.29   37.00
  -9   9 -24 1417.86   49.74
   9   0 -24 1459.58   49.01
   0  -9 -24 1354.89   40.99
   0  -9 -21    2.16    0.85
   0   9  21    0.76    1.11
   9   0 -21    1.69    1.13
   0   9  18  140.85   11.39
  -9   9 -18  148.43   15.94
   9   0 -18  162.37   16.71
   0  -9 -18  169.34   14.68
  -9   9 -15    6.08    3.52
   0   9  15    0.99    0.79
  -9   9 -15   -0.42    1.36
   0  -9 -15    1.73    2.16
   9   0 -15    1.93    1.54
   0   9  12 2262.75   44.26
  -9   9 -12 2366.71   57.32
   9   0 -12 2350.47   62.09
   0  -9 -12 2358.71   55.60
   0   9   9    2.10    0.82
  -9   9  -9    3.15    1.60
   0  -9  -9    1.48    1.34
   9   0  -9    2.51    2.31
   0   9   6  194.12   13.06
  -9   9  -6  175.94   15.95
   9   0  -6  175.13   17.29
   0  -9  -6  182.46   15.59
  -9   9  -3   -1.72    3.80
   0   9   3    2.77    2.49
   0  -9  -3    1.21    1.05
   0  -9  -3    3.81    2.76
   9   0  -3    5.44    1.91
   0   9   0  140.99   11.40
  -9   9   0  142.35   13.40
   9   0   0  128.17   14.65
   0  -9   0  128.00   12.68
   0  -9   0  128.26   11.91
   0   9  -3    1.06    1.88
  -9   9   3    1.64    1.84
   0   9  -3    3.26    1.96
   0  -9   3    0.61    0.34
   0  -9   3    3.09    2.01
   9   0   3    3.67    3.10
  -9   9   6 1183.26   40.51
   0   9  -6 1119.03   32.88
   0  -9   6 1075.90   34.22
   0  -9   6 1162.40   37.50
   0  -9   9    2.79    1.58
   0   9  -9   -1.27    1.91
  -9   9   9    0.77    3.11
   9  -9  -9    1.72    0.90
   0  -9   9    3.21    2.53
   9   0   9    1.98    2.07
  -9   9  12  229.72   18.55
   0   9 -12  238.80   16.47
   9  -9 -12  264.56   19.87
   9  -9 -12  229.03   12.70
   9   0  12  226.87   18.26
   0  -9  12  215.56   15.52
  -9   0 -12  220.94   17.63
   0  -9  12  232.45   16.48
   0  -9  15    4.30    3.15
   0   9 -15    1.44    1.98
  -9   9  15    1.01    1.50
   9  -9 -15    3.17    1.11
  -9   0 -15    3.57    1.45
   9  -9 -15    1.79    3.87
   9   0  15    1.65    2.10
   0  -9  15    4.14    2.03
  -9   9  18   81.90   12.08
   0   9 -18  114.14   12.12
   9  -9 -18   90.15   10.87
   9   0  18   83.85   10.86
   9  -9 -18  105.24    9.29
   0  -9  18  104.99   10.20
  -9   0 -18  102.08   11.92
   0  -9  21    3.43    2.44
   0   9 -21    2.25    2.57
  -9   9  21    1.12    3.05
   9  -9 -21    4.10    1.11
   9  -9 -21    0.70    2.40
  -9   0 -21    1.54    1.50
  -9   9  24 1740.52   54.87
   0   9 -24 1747.81   51.39
   9  -9 -24 1544.17   38.97
   9  -9 -24 1627.67   44.46
  -9   0 -24 1528.51   47.11
   9   0  27   -2.46    1.33
   0   9 -27   -2.17    2.59
  -9   9  27   -1.67    4.46
   9  -9 -27    2.61    2.48
  -9   0 -27   -1.03    3.00
   9   0  30   11.42    3.47
   0   9 -30   21.06    4.99
   9  -9 -30   22.44    4.30
  -9   0 -30   21.49    5.09
  -9   0 -33    0.84    1.03
   9   0  33    3.39    1.32
   0   9 -33    3.71    3.23
   9  -9 -33    1.52    1.33
  -9   0 -33    0.41    2.12
   9   0  36  676.77   30.24
   0   9 -36  839.78   37.63
   9  -9 -36  844.78   31.44
  -9   0 -36  719.45   29.81
   9   0  39   -1.95    2.28
   0   9 -39   -0.27    2.42
   9  -9 -39   -1.44    3.88
  -9   0 -39   -0.93    3.53
   9   0  42   75.02   10.78
   0   9 -42   69.18   11.32
   9  -9 -42   68.66    9.27
  -9   0 -42   51.20    7.60
   9   0  45   -1.65    2.28
   0   9 -45    1.88    2.24
   9  -9 -45   -2.86    3.90
  -9   0 -45    1.32    1.85
   9   0  48    1.22    4.09
   0   9 -48    5.51    3.18
   9  -9 -48    5.44    2.13
  -9   0 -48    1.69    2.54
   9   0  51    1.99    2.20
   9  -9 -51    2.74    0.94
   0   9 -51   -2.10    1.41
   9   0  54  171.87   16.81
   9  -9 -54  164.54   15.38
   0   9 -54  136.03   15.41
   9   0  57   -3.57    1.78
  -9   0 -57    1.93    3.13
  10  -5   0   37.54    6.01
  -5  -5   0   50.99   10.01
 -10   5   0   31.90    5.18
  -5  10   0   41.72    7.14
   5   5   0   34.15    5.97
   5 -10   0   47.17    5.79
  10  -5   0   37.32    7.86
  10  -5   3  757.14   26.53
  10  -5  -3 1205.84   40.67
  -5  10   3  919.34   33.85
 -10   5   3  898.33   29.88
  -5  10  -3  946.43   34.77
 -10   5  -3  902.46   28.51
  10  -5  -3  858.20   37.81
   5   5  -3  927.92   31.47
   5   5   3  909.32   29.89
 -10   5  -3  972.40   30.79
 -10   5   3  999.67   28.67
  -5  -5   3  975.94   40.74
  -5  -5  -3 1024.08   42.98
   5 -10  -3  902.80   26.87
  10  -5  -6  468.20   23.77
  -5  10   6  394.63   22.46
 -10   5  -6  392.05   19.27
  10  -5   6  345.72   18.17
 -10   5   6  392.58   20.46
  -5  10  -6  387.92   22.56
   5   5  -6  415.63   21.65
   5   5   6  406.43   19.96
  10  -5  -6  363.51   24.86
 -10   5  -6  509.89   23.32
  -5  -5   6  434.37   26.96
  -5  -5  -6  508.05   31.12
   5 -10  -6  413.32   17.64
 -10   5   6  501.80   19.42
  10  -5   9  100.81   10.10
 -10   5  -9  109.58   10.11
 -10   5   9  104.99   11.35
  -5  10   9  106.83   12.13
  -5  10  -9  112.20   12.71
   5   5  -9  114.89   11.78
   5 -10  -9  151.58    9.63
   5   5   9  108.18   10.38
  10  -5  -9   94.52   13.13
 -10   5  -9  170.30   13.71
  -5  -5   9  132.32   14.70
  -5  -5  -9  179.95   18.46
  -5  -5   9  129.68   13.02
   5 -10  -9  125.40   10.20
  10  -5  12   14.38    4.77
  -5  -5 -12   18.94    5.49
  -5  -5  12   14.52    4.47
  -5  10 -12   13.53    4.18
  -5  10  12   13.84    4.47
 -10   5  12   11.54    3.72
 -10   5 -12   12.88    3.36
  -5  10 -12   11.00    4.18
   5 -10 -12   15.02    3.39
  10  -5 -12    8.59    2.88
  -5  -5  12   14.86    4.35
   5   5  12   11.67    2.65
 -10   5 -12   15.57    4.22
  10  -5  15 1161.69   38.20
 -10   5  15 1163.88   39.88
  -5  -5  15 1202.05   38.98
  -5  10  15 1267.06   41.71
 -10   5 -15 1147.36   36.08
  -5  10 -15 1223.20   42.08
  10  -5 -15 1157.11   44.09
   5 -10 -15 1221.79   30.39
  -5  -5  15 1145.11   36.34
 -10   5 -15 1221.60   38.44
  -5  -5  15 1124.56   40.89
  -5  -5 -15 1341.16   48.59
  10  -5  18  467.13   25.71
  -5  10  18  422.77   23.99
  -5  -5  18  408.93   23.07
 -10   5 -18  396.93   21.55
  -5  10 -18  435.72   25.63
   5 -10 -18  436.39   18.83
  10  -5 -18  398.75   25.35
  -5  -5  18  406.33   24.28
  -5  -5 -18  448.80   27.11
  -5  -5  18  394.96   21.29
  10  -5  21  289.36   21.38
  -5  10  21  244.80   18.60
  -5  -5  21  270.96   18.74
 -10   5 -21  223.50   16.98
   5   5 -21  273.05   17.06
  -5  10 -21  257.56   20.52
   5 -10 -21  271.39   15.46
  10  -5 -21  243.95   19.81
  -5  -5 -21  269.07   20.47
  -5  -5  21  240.93   18.02
  -5  -5  21  255.75   17.46
  10  -5  24   80.63   12.73
  -5  -5  24   57.19    8.33
  -5  10  24   43.04    7.94
   5   5 -24   44.24    6.74
  -5  10 -24   42.50    9.26
 -10   5 -24   43.95    7.81
   5 -10 -24   66.93    8.00
  10  -5 -24   53.21    7.71
  -5  -5  24   61.28    8.91
  -5  -5  24   54.56    8.55
  -5  -5 -24   69.75   10.59
  10  -5 -24   40.16    7.65
  10  -5  27  158.34   17.79
  -5  10  27   96.20   12.10
  -5  -5  27  109.79   12.18
   5   5 -27  106.84   11.40
  -5  10 -27  110.15   14.22
 -10   5 -27   92.62   11.18
   5 -10 -27  124.28   11.39
  10  -5 -27   99.51   12.38
  10  -5 -27  113.73   11.78
  -5  -5 -27  112.40   12.54
  -5  -5  27  118.43   12.33
  -5  -5  30  246.03   18.53
  -5  10  30  278.35   20.97
  -5  10 -30  259.98   21.72
 -10   5 -30  229.33   18.07
   5   5 -30  282.85   19.51
  10  -5 -30  251.01   17.66
   5 -10 -30  238.88   15.98
  10  -5 -30  277.63   21.04
  -5  -5 -30  225.03   17.81
  -5  -5 -30  266.81   19.98
  -5  -5  30  254.02   18.06
  -5  10  33  856.75   37.38
  -5  -5  33  722.90   32.80
   5   5 -33  777.60   32.96
  -5  10 -33  776.83   38.18
 -10   5 -33  671.22   32.37
   5 -10 -33  721.06   28.66
  10  -5 -33  759.03   35.20
  10  -5 -33  702.51   29.77
  -5  -5  33  817.40   33.72
  -5  -5 -33  772.65   32.58
  -5  -5 -33  634.53   28.58
  -5  -5  36  106.74   12.57
  -5  10 -36   96.00   13.83
 -10   5 -36   95.01   12.91
   5   5 -36   93.66   12.17
   5 -10 -36  105.27   11.03
  10  -5 -36   93.85   13.12
  10  -5 -36  100.42   11.40
  -5  -5 -36  111.83   12.71
  -5  -5 -36  104.25   11.35
  10  -5  39   57.40   10.97
  -5  -5  39   39.69    7.80
  -5  -5 -39   44.65    6.81
  -5  10 -39   35.11    8.94
   5   5 -39   27.23    6.13
 -10   5 -39   38.67    8.31
  10  -5 -39   33.73    7.64
   5 -10 -39   42.30    7.22
  10  -5 -39   38.95    7.40
  -5  -5 -39   48.60    7.78
  10  -5  42  125.81   16.47
  -5  -5  42  109.27   13.75
   5   5 -42  100.02   12.14
  -5  10 -42  105.85   15.00
 -10   5 -42   84.43   11.54
   5 -10 -42  102.37   11.37
  10  -5 -42  102.37   12.18
  -5  -5 -42   97.57   10.56
  -5  -5 -42  105.98   12.04
  10  -5  45  256.95   23.61
   5   5 -45  203.21   18.58
 -10   5 -45  185.55   17.59
  -5  10 -45  209.36   20.96
   5 -10 -45  219.18   16.89
  10  -5 -45  221.95   17.60
  -5  -5 -45  203.49   15.80
  10  -5  48    7.13    3.91
   5   5 -48   12.52    4.52
  -5  10 -48    2.67    4.49
   5 -10 -48    6.02    2.27
  10  -5 -48    3.64    2.10
  -5  -5 -48    3.30    2.39
  10  -5  51  394.24   28.74
   5   5 -51  337.37   25.65
  -5  10 -51  352.90   27.91
   5 -10 -51  296.99   20.54
  10  -5 -51  328.47   22.25
  -5  -5 -51  274.56   17.59
   5   5 -54  187.38   19.40
  -5  10 -54  196.30   20.93
   5 -10 -54  195.12   16.93
  10  -5 -54  197.28   17.50
  -5  -5 -54  137.32   13.13
  -5  -5 -54  157.24   13.08
   5   5 -57   15.98    6.94
  10  -5  57   19.00    7.68
  -5  -5 -57   18.15    3.82
   6   4 -58   41.74    4.60
  -4  -6 -58   41.99    6.82
 -10   6 -55   22.88    7.31
   6   4 -55   14.63    4.95
  -6  10 -55   18.35    8.49
   4 -10 -55   18.19    5.02
  10  -4 -55   13.16    4.12
  -4  -6 -55   10.00    3.06
  -4  -6 -55   18.02    5.26
   6   4 -52   30.67    5.74
  -6  10 -52   35.37    7.39
 -10   6 -52   29.60    7.97
  -4  -6 -52   20.48    5.07
   4 -10 -52   28.60    6.07
  10  -4 -52   25.97    5.33
  -4  -6 -52   29.90    5.40
   6   4 -49   39.33    9.03
  -6  10 -49   46.54   10.96
 -10   6 -49   39.96    9.28
  -4  -6 -49   25.82    5.91
   4 -10 -49   35.29    6.78
  10  -4 -49   38.01    7.55
  -4  -6 -49   35.77    5.82
  -6  -4  46   14.23    4.17
  -6  10 -46   10.09    5.32
 -10   6 -46   18.67    6.19
   6   4 -46   13.48    6.41
   4 -10 -46   10.08    3.13
  10  -4 -46    9.47    3.30
  -4  -6 -46   13.13    4.13
  -6  -4  43   27.16    7.32
  -6  10 -43   22.78    5.39
 -10   6 -43   19.73    3.80
   6   4 -43   27.41    7.94
   4 -10 -43   30.62    5.74
  10  -4 -43   28.50    5.82
  -4  -6 -43   26.14    5.77
  -6  -4  40    7.69    3.78
  -4  -6 -40    9.37    3.94
 -10   4  40    2.89    1.27
  -6  10 -40    5.32    2.94
 -10   6 -40    8.90    5.45
   6   4 -40    7.68    4.50
   4 -10 -40    9.27    3.30
  10  -4 -40    5.57    2.54
  10  -4 -40    2.15    2.38
  -6  -4  40    4.31    4.39
  -4  -6 -40    6.92    2.20
  -6  -4  37   39.80    7.28
  -4  -6 -37   44.03    8.34
 -10   4  37   43.31    7.31
 -10   6 -37   41.26    8.34
   6   4 -37   49.48    9.80
  -6  10 -37   43.70   10.09
  10  -4 -37   41.40    8.66
   4 -10 -37   45.26    7.27
  10  -4 -37   38.23    7.16
  -6  -4  37   49.53    8.43
  -4  -6 -37   45.20    7.81
  -6  -4  34   11.20    4.22
  -4  -6 -34   19.67    5.72
   6   4 -34    9.78    3.94
  -4  10  34    7.68    3.75
  -6  10 -34    5.47    4.39
 -10   6 -34    7.68    2.67
  10  -4 -34    6.59    1.61
   4 -10 -34   14.22    3.61
  10  -4 -34    7.45    1.71
  -4  -6 -34    7.29    3.40
  -6  -4  34    7.35    2.62
  -4  10  31  138.62   14.15
  -6  -4  31  145.25   13.95
   4 -10 -31  161.28   13.76
   6   4 -31  180.22   16.82
  -6  10 -31  145.51   16.68
 -10   6 -31  130.08   14.05
  10  -4 -31  134.99   15.40
   4 -10 -31  154.67   12.47
  10  -4 -31  156.11   14.12
  -4  -6 -31  195.17   18.48
  -4  -6 -31  154.04   14.87
  -6  -4  31  157.89   13.68
  -6  -4  28   50.14    9.08
   4 -10 -28   67.42    8.70
   6   4 -28   44.24    7.81
  -4  10  28   41.16    7.89
  -6  10 -28   38.25    7.71
 -10   6 -28   34.88    7.56
  10  -4 -28   50.75    8.08
   4 -10 -28   56.70    7.54
  -6  -4  28   58.12    8.47
  10  -4 -28   35.07    8.46
  -4  -6 -28   78.09   12.17
   4 -10 -25   13.32    4.37
  -6  -4  25    7.04    3.38
  -4  -6 -25   11.72    5.05
  -6  -4  25   11.49    4.66
  -6  10 -25   11.42    4.29
   6   4 -25    7.28    3.55
 -10   6 -25    6.22    3.24
  -4  10  25    7.54    2.93
   4 -10 -25   11.34    3.92
  10  -4 -25    7.96    4.26
  -6  -4  25    8.80    3.42
  -6  -4  22  276.57   20.14
  -4  10  22  299.40   19.81
   4 -10 -22  327.51   19.60
  -6  10 -22  311.25   22.56
 -10   6 -22  286.62   20.03
   4 -10 -22  322.75   17.34
  10  -4 -22  282.39   21.86
  -6  -4  22  291.20   20.81
  -4  -6 -22  329.62   23.65
  -6  -4  22  295.42   18.24
  -6  -4  19  148.98   13.64
   4 -10 -19  155.16   13.57
  -4  10  19  161.45   14.62
 -10   6 -19  166.62   15.30
  -6  10 -19  178.17   17.16
   4 -10 -19  183.00   12.77
  10  -4 -19  166.18   16.75
  -4  -6 -19  176.72   17.26
  -6  -4  19  159.20   13.91
  -6  -4  19  168.43   16.37
   4 -10 -16  277.66   17.99
  -4  10  16  272.79   19.03
 -10   6 -16  235.28   17.78
  -6  10 -16  248.05   19.50
   6   4 -16  253.38   18.88
   4 -10 -16  281.18   15.16
  10  -4 -16  246.46   20.74
  -6  -4  16  261.39   20.92
  -4  -6 -16  269.59   21.08
  -6  -4  16  257.12   17.26
  -4  10  13  182.92   15.35
 -10   4  13  191.34   15.40
   4 -10 -13  240.70   16.89
  -6  10 -13  197.42   16.93
  -6  10 -13  190.33   16.27
 -10   6 -13  181.55   14.20
  10  -4 -13  172.43   17.43
   6   4 -13  189.73   15.98
   4 -10 -13  231.11   13.10
  -6  -4  13  230.16   20.58
  -6  -4  13  206.27   16.18
  -4  -6 -13  248.98   19.69
   4 -10 -10  487.22   24.00
 -10   6 -10  530.90   24.22
  -6  10 -10  527.71   27.60
  -4  10  10  529.37   25.82
 -10   4  10  513.44   23.82
   6   4 -10  536.76   26.22
   4   6  10  548.04   20.01
  10  -4 -10  483.40   29.07
   4 -10 -10  546.79   19.19
  -6  -4  10  570.52   33.65
  -4  -6 -10  488.36   27.95
   4 -10  -7  118.27   11.95
  -6  10  -7  122.66   12.86
  10  -6   7  126.17   12.12
  -4  10   7  138.31   12.88
 -10   4   7  120.45   11.69
 -10   6  -7  127.51   11.77
   4   6   7  136.52   10.28
   6   4  -7  128.45   12.58
   4 -10  -7  138.52    9.10
  10  -4  -7  117.73   14.30
  -4  -6  -7  116.81   13.80
  -6  -4   7  157.57   17.71
 -10   4   7   94.76    8.17
   4 -10  -7  138.37   11.11
 -10   6  -4   54.19    7.73
  10  -6   4   46.60    6.46
  -6  10  -4   53.56    8.68
  -4  -6  -4   54.44    8.89
   4 -10  -4   56.57    7.83
  -4  10   4   53.88    7.86
 -10   4   4   54.71    7.46
  -6  -4   4   74.42   11.86
   4   6   4   67.14    7.69
   6   4  -4   69.65    9.09
  10  -4  -4   56.82    9.97
   4 -10  -4   55.07    6.77
 -10   4   4   48.06    6.16
  10  -6   1  251.25   15.19
  -6  10  -1  274.07   19.01
  -4  10   1  294.76   18.83
 -10   4   1  289.05   15.47
  10  -4  -1  338.87   21.45
   4 -10  -1  281.11   17.77
 -10   6  -1  278.67   16.95
  10  -4  -1  275.61   20.98
   4   6   1  310.68   16.81
   6   4  -1  314.34   19.36
  -6  -4   1  320.40   24.32
  -4  -6  -1  266.11   19.97
 -10   4   1  260.55   15.14
   4 -10  -1  274.46   15.24
  -4  10  -2   23.55    5.70
 -10   6   2   23.32    5.17
 -10   4  -2   20.13    4.86
  -6  10   2   25.25    5.62
   4 -10   2   35.78    6.18
  10  -6  -2   24.55    4.46
  10  -4   2   24.18    5.31
  -4  -6   2   27.87    5.96
  -6  -4  -2   26.72    6.40
   4 -10   2   24.85    4.37
   6   4   2   25.45    5.56
  10  -4   2   20.69    5.42
  10  -6  -2   17.08    6.25
 -10   4  -2   30.07    5.68
  10  -4   5  103.73   10.53
  -6  10   5  116.92   12.47
   4 -10   5  144.76   12.71
 -10   6   5  120.04   12.01
  -4  10  -5  121.73   12.58
 -10   4  -5  116.89    9.89
  10  -6  -5  107.26   13.31
   6   4   5  128.11   11.89
  -6  -4  -5  127.61   14.46
 -10   4  -5  133.52   11.56
  -4  -6   5  134.71   14.10
   6 -10  -5  130.67    9.63
  -6  10   8   36.63    6.89
 -10   4  -8   36.22    5.44
  -4  10  -8   30.20    6.48
 -10   6   8   30.71    6.38
   4 -10   8   34.66    5.54
  10  -4   8   28.24    4.94
  10  -6  -8   49.01    8.00
  -6  -4  -8   41.13    8.27
  -4  -6   8   26.91    6.30
  -4  -6   8   28.82    4.01
  -4  -6   8   31.84    6.44
   6 -10  -8   39.93    5.53
   6   4   8   38.45    6.62
 -10   4  -8   28.61    5.07
  10  -6  -8   34.87    7.48
  10  -4  11   29.33    5.52
  10  -6 -11   54.41    7.43
  -6  -4 -11   41.55    8.36
  -4  -6  11   43.60    7.26
  -4  -6  11   44.90    7.37
  -4  10 -11   40.09    7.68
  -6  10  11   48.59    8.37
 -10   4 -11   39.51    5.67
  -4  10 -11   38.31    7.42
 -10   6  11   33.77    6.30
   6 -10 -11   45.52    5.33
  -4  -6  11   39.97    7.31
   6   4  11   46.39    6.68
  10  -6 -11   35.24    8.10
 -10   4 -11   38.40    6.16
  -6  -4 -14   16.20    4.83
  10  -4  14   14.90    4.43
  -4  -6  14   17.08    5.06
  -4  -6  14   22.49    5.65
 -10   4 -14   12.80    3.53
  -4  10 -14   15.15    4.57
 -10   6  14   15.56    5.27
  -6  10  14   19.80    5.55
   6 -10 -14   18.65    3.28
  -4  -6  14   15.09    2.28
   6   4  14   16.24    4.30
  10  -6 -14   17.28    4.92
 -10   4 -14   17.07    4.54
  10  -4  17  280.10   18.23
 -10   6  17  297.31   21.11
  -6  10  17  286.18   20.34
  -4  -6  17  301.21   19.07
  -4  10 -17  298.37   20.98
 -10   4 -17  263.05   16.65
   4   6 -17  281.59   15.68
   6 -10 -17  312.03   15.42
   6   4  17  321.43   18.89
  10  -6 -17  272.86   21.03
 -10   4 -17  278.51   17.67
  -6  -4 -17  284.95   20.02
  -4  -6  17  300.53   19.91
  -4  -6  17  330.31   19.65
  10  -4  20  196.83   15.90
  -4  -6  20  215.22   16.62
  -6  10  20  193.97   16.83
  -4  10 -20  198.26   17.32
 -10   4 -20  167.88   13.23
   4   6 -20  180.03   13.19
   6 -10 -20  224.51   13.59
  10  -6 -20  203.91   14.98
  10  -6 -20  183.83   16.66
 -10   4 -20  215.07   15.28
  -4  -6  20  224.22   16.69
  -6  -4 -20  206.39   16.85
  -4  -6  20  211.38   16.60
  -4  -6  23    2.07    0.93
  -6  -4 -23    2.99    2.29
  10  -4  23    0.20    1.90
  -4  -6  23    2.08    3.14
 -10   4 -23    1.67    1.64
   4   6 -23    3.88    2.84
  -6  10  23    2.45    1.89
  -4  10 -23    1.54    2.31
   6 -10 -23    3.41    0.91
  10  -6 -23    6.44    2.89
  -4  -6  23    5.76    3.40
 -10   4 -23    2.51    1.75
  10  -6 -23    0.86    2.10
  -6  10  26  337.63   23.23
  10  -4  26  348.75   23.37
  -4  -6  26  329.65   21.16
  -4  10 -26  328.74   23.62
   4   6 -26  318.68   18.72
 -10   4 -26  268.70   18.35
   6 -10 -26  334.25   17.79
  10  -6 -26  322.14   19.04
  10  -6 -26  304.68   21.31
  -4  -6  26  348.80   21.61
  -6  -4 -26  329.86   21.63
 -10   4 -26  280.55   17.74
  -6  -4 -26  283.86   19.38
  10  -4  29  176.52   16.91
  -6  10  29  188.07   17.61
  -4  -6  29  156.51   14.55
  -4  10 -29  184.89   18.18
   4   6 -29  155.83   13.16
 -10   4 -29  143.63   13.78
   6 -10 -29  146.58   12.02
  10  -6 -29  163.73   15.37
  10  -6 -29  158.26   13.96
  -4  -6  29  151.44   14.53
  -6  -4 -29  128.57   12.76
  -6  -4 -29  161.45   15.09
  10  -4  32  251.11   20.46
  -4  -6  32  222.65   17.61
  -6  10  32  235.67   19.88
  -4  10 -32  209.80   19.84
   4   6 -32  201.13   15.64
 -10   4 -32  176.21   15.54
   6 -10 -32  198.34   14.23
  10  -6 -32  215.10   18.06
  10  -6 -32  211.53   16.30
  -6  -4 -32  213.81   17.58
  -6  -4 -32  178.98   14.87
  10  -4  35  152.12   16.78
  -4  -6  35  159.05   15.70
  -4  10 -35  141.73   16.99
   4   6 -35  125.58   13.17
   6 -10 -35  142.85   12.88
  10  -6 -35  130.18   14.27
  10  -6 -35  147.55   14.00
  -6  -4 -35  153.63   15.21
  -6  -4 -35  120.41   11.72
  10  -4  38  139.80   15.76
  -4  -6  38  136.95   15.57
  -4  10 -38  129.05   16.40
   4   6 -38  125.07   12.41
   6 -10 -38  114.15   11.60
  10  -6 -38  138.69   15.41
  10  -6 -38  114.95   12.31
  -6  -4 -38   92.28   10.49
  -6  -4 -38  132.92   14.04
  10  -4  41    8.63    1.61
  -6  -4 -41    5.02    1.71
   4   6 -41    8.96    4.02
  -4  10 -41    7.87    1.48
   6 -10 -41    7.84    3.23
  10  -6 -41    5.32    2.49
  10  -6 -41   11.56    3.72
  -6  -4 -41    5.32    1.92
  10  -4  44    8.36    3.72
   4   6 -44    5.33    3.05
  -4  10 -44    4.91    1.30
   6 -10 -44    3.87    2.89
  10  -6 -44    4.81    2.48
  -6  -4 -44    2.86    2.29
  10  -4  47  133.23   15.46
  -4  10 -47  116.31   15.32
   4   6 -47  108.78   13.20
   6 -10 -47  101.43   11.05
  10  -6 -47  111.50   12.66
  -6  -4 -47  103.34   11.23
  10  -4  50    1.48    4.30
  -4  10 -50    8.94    4.30
   4   6 -50    3.62    3.01
   6 -10 -50    5.60    3.10
  10  -6 -50    9.07    4.70
  -6  -4 -50    4.77    1.08
  10  -4  53   11.42    4.60
   4   6 -53   11.58    3.97
  -4  10 -53    8.40    2.89
   6 -10 -53   10.52    2.86
  10  -6 -53   19.32    6.37
  -6  -4 -53   10.99    3.75
  10  -4  56    2.75    3.13
   4   6 -56    8.39    5.11
   6 -10 -56   -2.35    4.53
  -6  -4 -56    1.79    0.44
 -10   7 -59   99.68   14.82
 -10   7 -56   34.78    8.24
  -7  10 -53   11.00    6.12
 -10   7 -53    6.15    3.49
   3 -10 -53    3.87    1.78
  10  -3 -53    8.51    2.35
  -3  -7 -53    1.90    1.80
  -7  -3  50  211.23   19.21
  -7  10 -50  219.12   22.13
 -10   7 -50  205.47   20.26
   3 -10 -50  198.93   16.47
  -3  -7 -50  160.35   14.57
  10  -3 -50  209.43   17.68
  -3  -7 -50  192.26   14.65
  -7  -3  47  647.12   32.56
 -10   7 -47  578.34   33.84
  -7  10 -47  634.93   37.83
   3 -10 -47  593.11   28.30
  10  -3 -47  604.47   29.52
  -3  -7 -47  501.87   25.81
  -3  -7 -47  622.58   27.54
 -10   3  44   52.39    8.03
  -7  -3  44   56.71    8.94
  -7  10 -44   69.70   12.32
 -10   7 -44   44.20    9.22
   3 -10 -44   62.12    8.65
  10  -3 -44   53.80    9.15
  -3  -7 -44   56.08    7.29
 -10   3  41   12.62    4.37
   3 -10 -41    8.41    3.01
  -7  -3  41    8.19    4.01
  -3  -7 -41   12.42    4.53
  -7  10 -41   14.13    5.99
 -10   7 -41    8.11    3.09
   7   3 -41   -2.84   10.06
  10  -3 -41    5.81    3.32
   3 -10 -41   11.04    4.03
  -3  -7 -41    9.25    4.11
 -10   3  38  590.46   28.10
  -3  10  38  666.79   32.63
   3 -10 -38  616.72   26.72
  -7  -3  38  595.26   30.29
  -7  10 -38  655.12   36.61
 -10   7 -38  618.02   33.55
   7   3 -38  684.46   38.10
  10  -3 -38  666.52   35.19
   3 -10 -38  582.82   26.34
  10  -3 -38  608.42   29.29
  -3  -7 -38  713.56   32.94
  -3  -7 -38  645.80   29.09
  -7  -3  38  601.04   27.33
  -7  -3  35   58.95    8.95
   3 -10 -35   67.37    8.44
  -3  10  35   66.80    9.22
   7   3 -35   71.02    9.45
  -7  10 -35   63.97   11.62
 -10   7 -35   64.60   10.49
  10  -3 -35   63.76   11.05
  10  -3 -35   65.85    9.30
   3 -10 -35   66.80    8.59
  -3  -7 -35   67.53    8.97
  -7  -3  35   63.98    8.59
  -3  -7 -35   79.04   11.01
   3 -10 -32   22.13    3.66
  -3  -7 -32   25.50    5.35
  -7  -3  32   19.10    5.63
  -3  10  32   10.28    4.51
  -7  10 -32   12.40    1.76
 -10   7 -32   11.40    3.41
   7   3 -32    7.63    5.82
  10  -3 -32    9.78    3.48
  10  -3 -32   21.98    6.29
   3 -10 -32   27.66    5.93
  -3  -7 -32   14.19    4.76
  -7  -3  32   21.48    4.99
  -7  -3  29 1435.48   45.53
  -3  10  29 1414.34   42.83
   7   3 -29 1697.75   54.42
  -7  10 -29 1537.74   53.71
 -10   7 -29 1475.37   49.07
  10  -3 -29 1532.02   50.39
   3 -10 -29 1512.78   40.11
   3 -10 -29 1634.77   44.50
  -3  -7 -29 1663.09   49.43
  -7  -3  29 1497.96   40.89
  -3  -7 -26   34.55    6.73
  -7  -3  26   30.61    6.52
   3 -10 -26   41.31    7.13
  -7  10 -26   46.65    8.87
 -10   7 -26   44.09    8.57
  -3  10  26   35.06    6.76
   3 -10 -26   39.07    6.22
  10  -3 -26   46.77    9.01
  -7  -3  26   34.40    5.39
  -7  -3  23    2.23    0.49
   3 -10 -23    2.85    1.38
  -3  10  23    5.07    0.64
  -7  10 -23    4.22    2.03
 -10   7 -23    4.71    2.89
   7   3 -23    3.48    0.93
   3 -10 -23    5.25    2.12
  10  -3 -23    7.86    5.61
  -7  -3  23    2.91    1.77
  -3  10  20  284.55   18.72
 -10   7 -20  291.25   20.92
  -7  10 -20  289.99   22.11
   7   3 -20  296.48   21.63
   3 -10 -20  297.86   16.38
  10  -3 -20  298.26   22.72
  -3  -7 -20  317.80   21.51
  -7  -3  20  295.91   18.63
   3 -10 -20  316.51   19.82
  -3  10  17 1009.06   35.35
 -10   7 -17  927.22   36.52
  -7  10 -17  985.85   39.01
   7   3 -17 1006.38   39.31
   3 -10 -17 1039.54   29.64
  10  -3 -17 1008.47   41.33
   3 -10 -17 1057.44   36.40
  -7  -3  17 1011.17   34.97
  -3  -7 -17 1004.78   38.10
  -7  10 -14   52.81    9.43
  -3  10  14   50.70    7.69
 -10   7 -14   45.48    6.96
  -7  10 -14   49.23    8.48
   3 -10 -14   60.55    7.01
   7   3 -14   45.48    8.29
  10  -3 -14   51.52    9.99
   3 -10 -14   72.07    9.03
  -3  -7 -14   56.74    9.23
  -7  10 -11  891.00   35.79
  -3  10  11  887.45   32.24
 -10   3  11  873.64   31.26
 -10   7 -11  893.42   32.87
  10  -3 -11  855.55   38.62
   7   3 -11  867.07   35.11
   3 -10 -11  921.87   26.33
   3 -10 -11  911.12   33.63
  -3  -7 -11  843.65   34.54
  -3  -7  -8    8.41    3.15
   3 -10  -8    8.27    3.68
 -10   3   8   11.82    3.39
  -3  10   8    8.74    2.75
 -10   7  -8   12.14    4.46
  -7  10  -8    9.78    1.78
   7   3  -8   12.47    3.55
  10  -3  -8    9.68    4.54
 -10   3   5   19.68    4.10
  -3  10   5   22.67    4.59
 -10   7  -5   18.47    3.60
  -7  10  -5   22.24    5.35
  -3  -7  -5   22.68    6.07
   3 -10  -5   26.89    6.06
   3 -10  -5   18.13    3.24
   7   3  -5   25.37    5.66
  10  -3  -5   18.18    5.62
 -10   3   2 1240.25   30.32
  -7  10  -2 1250.81   40.06
  -3  10   2 1262.94   38.15
 -10   7  -2 1226.72   36.67
  10  -3  -2 1147.30   43.07
   7   3  -2 1296.44   41.78
   3 -10  -2 1280.53   38.86
 -10   3   2 1067.65   32.81
  -3  -7  -2 1232.48   41.57
   3 -10  -2 1164.37   32.50
  10  -7  -1 1801.65   42.86
  -3  10  -1 1674.93   44.69
 -10   7   1 1542.82   42.50
  -3  -7   1 1787.08   42.84
 -10   3  -1 1620.53   33.59
  -7  10   1 1645.74   46.22
   7   3   1 1695.02   47.65
  10  -3   1 1435.41   48.11
   3 -10   1 1690.85   44.30
 -10   3  -1 1340.70   36.08
  -3  -7   1 1637.55   47.79
   3 -10   1 1552.48   38.66
  10  -7  -4  195.02   12.96
 -10   7   4  195.44   15.95
 -10   3  -4  204.23   11.69
  10  -3   4  238.56   19.44
  -3  10  -4  207.94   15.75
  -7  10   4  203.45   16.82
  -3  -7   4  201.84   14.52
  10  -3   4  173.12   16.74
   7   3   4  213.93   16.82
   3 -10   4  200.92   13.99
   3 -10   4  187.65   14.48
  -3  -7   4  199.35   15.35
  -3  -7   4  193.54   16.27
 -10   3  -4  148.73   12.32
  10  -7  -7  197.54   14.17
  -3  -7   7  155.28   13.02
  10  -3   7  142.00   12.52
  -7  10   7  156.31   15.12
 -10   7   7  155.22   14.13
  -3  10  -7  166.32   14.40
  10  -7  -7  160.82   16.53
  10  -3   7  138.32   14.84
   7   3   7  152.63   13.91
  -7  -3  -7  150.80   15.34
   3 -10   7  144.90   12.67
 -10   3  -7  119.78   11.62
  -3  -7   7  146.01   14.33
  -3  -7   7  154.26   13.45
  -7  10  10 1275.61   43.88
  10  -3  10  913.92   30.48
  -3  -7  10 1191.35   36.21
 -10   7  10 1140.41   38.16
  -3  10 -10 1181.95   38.68
  -3  10 -10 1168.15   38.52
 -10   3 -10 1138.78   30.67
   7   3  10 1212.37   38.88
  10  -7 -10 1204.79   44.40
  -3  -7  10 1180.44   37.82
   3 -10  10 1103.46   34.86
  -7  -3 -10 1183.18   41.33
 -10   3 -10 1009.19   33.36
  -3  -7  10 1155.43   39.68
  -3  -7  13   70.90    8.75
  10  -3  13   46.89    7.10
  -7  10  13   62.28    9.49
 -10   3 -13   54.57    6.89
  -3  10 -13   64.87    8.93
 -10   7  13   51.05    8.18
   3   7 -13   55.10    6.58
   7   3  13   59.97    8.60
  10  -7 -13   59.15   10.01
   7 -10 -13   76.89    6.90
  -7  -3 -13   69.44   10.29
 -10   3 -13   71.91    9.05
  -3  -7  13   79.67   10.06
  -3  -7  13   69.61   10.04
   3 -10  13   81.66    9.65
  -3  -7  16   21.96    4.82
  10  -3  16   11.97    2.38
  -7  -3 -16   17.25    5.06
  -3  -7  16   22.34    5.12
   3 -10  16   27.64    5.78
  -7  10  16   17.17    5.54
 -10   7  16   15.38    3.94
  -3  10 -16   22.24    5.04
   3   7 -16   14.41    4.10
   7 -10 -16   27.37    4.90
  10  -7 -16   18.87    3.17
 -10   3 -16   23.61    4.73
  10  -7 -16   15.03    4.17
  -3  -7  16   25.67    5.59
   7   3  16   14.16    3.29
  10  -3  19 1370.98   39.76
  -3  -7  19 1668.20   44.96
 -10   7  19 1769.67   52.11
   3 -10  19 1813.22   44.16
  -7  10  19 1693.98   51.02
  -3  10 -19 1717.28   49.80
   3   7 -19 1579.79   38.60
  10  -7 -19 1660.80   50.51
   7   3  19 1655.24   44.71
  10  -7 -19 1641.40   40.50
   7 -10 -19 1690.52   37.02
  -3  -7  19 1796.85   47.83
  -7  -3 -19 1730.22   49.86
 -10   3 -19 1293.66   36.99
  -3  -7  19 1662.95   45.37
  -3  -7  22   17.45    5.18
  -7  -3 -22   22.97    5.93
  10  -3  22   24.27    5.90
  -3  -7  22   21.83    4.54
  -7  10  22   21.94    5.93
  -3  10 -22   25.69    6.00
   3   7 -22   22.76    4.79
   7 -10 -22   21.31    5.09
  10  -7 -22   21.90    5.04
  -3  -7  22   25.92    5.12
  10  -7 -22   22.84    5.94
 -10   3 -22   18.69    4.90
  -3  -7  25    6.55    2.05
  10  -3  25    3.99    2.04
  -3  -7  25    4.15    1.92
  -7  -3 -25    3.55    1.02
  -3  10 -25    9.86    3.71
  -7  10  25    4.45    0.66
   3   7 -25    2.67    1.14
   7 -10 -25    6.56    2.84
  10  -7 -25    8.09    3.67
  -3  -7  25   10.03    3.81
  -7  -3 -25    4.25    1.45
  10  -7 -25    6.28    2.50
 -10   3 -25    7.93    3.01
  10  -3  28  268.15   19.53
  -7  10  28  308.56   23.11
  -3  -7  28  298.38   19.75
   3   7 -28  272.03   18.04
  -3  10 -28  291.41   22.09
  10  -7 -28  281.88   19.71
  10  -7 -28  292.16   18.65
   7 -10 -28  277.21   16.38
  -7  -3 -28  282.82   20.04
 -10   3 -28  217.96   15.07
  -7  -3 -28  265.14   19.08
  10  -3  31  342.25   23.61
  -7  10  31  345.19   25.59
  -3  -7  31  382.64   23.69
   3   7 -31  301.23   19.68
  -3  10 -31  350.91   25.08
  10  -7 -31  310.48   21.23
  10  -7 -31  390.83   21.98
   7 -10 -31  383.29   19.91
 -10   3 -31  304.32   17.80
  -7  -3 -31  363.98   21.36
  -7  -3 -31  389.74   23.41
  10  -3  34   37.81    7.23
  -7  -3 -34   36.69    6.48
  -3  10 -34   31.99    8.79
   3   7 -34   28.89    5.74
   7 -10 -34   32.67    5.17
  10  -7 -34   32.06    6.86
  10  -7 -34   40.11    7.42
 -10   3 -34   27.47    4.62
  -7  -3 -34   39.64    7.34
  10  -3  37  640.96   33.44
   3   7 -37  579.72   28.44
  -3  10 -37  634.39   34.57
  10  -7 -37  616.10   30.76
  10  -7 -37  606.01   28.05
   7 -10 -37  547.05   25.04
  -7  -3 -37  579.72   29.05
  -7  -3 -37  528.04   25.14
  10  -3  40    3.10    1.61
  -7  -3 -40    6.78    1.20
  -3  10 -40    6.59    2.63
   3   7 -40    5.62    1.44
   7 -10 -40    3.54    0.96
  10  -7 -40    2.00    2.43
  -7  -3 -40    3.05    2.43
  10  -3  43   10.26    4.32
  -3  10 -43   10.40    2.53
   3   7 -43   12.79    5.02
   7 -10 -43    9.76    3.89
  10  -7 -43    9.53    4.01
  -7  -3 -43    4.98    2.56
  10  -3  46  601.01   33.79
   3   7 -46  546.65   29.63
  -3  10 -46  528.77   31.72
  10  -7 -46  554.21   27.95
   7 -10 -46  518.45   26.00
  -7  -3 -46  462.15   23.90
  10  -3  49  449.48   29.26
  -3  10 -49  391.41   27.64
   3   7 -49  383.98   25.59
  10  -7 -49  441.14   25.43
   7 -10 -49  418.84   23.90
  -7  -3 -49  350.42   20.63
  10  -3  52   82.68   12.31
   3   7 -52   74.97   10.96
  -3  10 -52   65.45   11.51
   7 -10 -52   68.75   10.12
  10  -7 -52   72.29   10.01
  -7  -3 -52   54.97    8.01
  10  -3  55  113.00   14.83
  -3  10 -55   98.26   14.41
   3   7 -55   94.78   13.26
  10  -7 -55   95.44   12.68
   7 -10 -55   89.32   11.26
  -7  -3 -55   72.77    8.99
  10  -3  58  250.13   23.24
 -10   8 -57  157.55   18.91
   2 -10 -54    4.19    3.46
  -2  -8 -54    1.14    3.15
  -8  10 -54    4.75    4.13
 -10   8 -54   12.15    6.19
  -8  -2  51  276.09   21.51
   2 -10 -51  243.25   18.96
  -2  -8 -51  218.76   17.77
  10  -2 -51  251.54   19.63
  -8  10 -51  302.00   26.25
 -10   8 -51  279.18   24.72
 -10   2  48   91.89   11.69
  -8  -2  48   88.82   11.04
  -8  10 -48  103.16   14.97
 -10   8 -48   89.68   13.31
   2 -10 -48   90.25   11.28
  10  -2 -48   90.12   11.80
  -2  -8 -48   79.33   10.78
   2 -10 -45   71.10    9.05
 -10   2  45   56.14    8.86
  -8  -2  45   59.50    9.26
  -8  10 -45   49.76    9.97
 -10   8 -45   51.42   10.16
  -2  -8 -45   57.23    8.47
  10  -2 -45   58.99    9.39
   2 -10 -45   61.70    8.65
  -2  -8 -45   53.48    7.34
 -10   2  42   28.49    5.83
  -8  -2  42   32.14    7.96
   2 -10 -42   30.56    6.36
  -2  -8 -42   32.85    6.96
  -8  10 -42   35.10    8.46
 -10   8 -42   25.90    6.62
  10  -2 -42   30.10    6.56
   2 -10 -42   26.19    5.74
  -2  -8 -42   29.04    6.28
  -8  -2  39  189.90   16.81
 -10   2  39  198.62   16.82
  -2  10  39  230.71   18.42
  -8  10 -39  218.57   21.60
 -10   8 -39  194.01   19.82
  10  -2 -39  218.44   20.88
   2 -10 -39  194.70   15.59
   2 -10 -39  210.66   15.93
  -2  -8 -39  222.67   16.78
  -2  -8 -39  227.84   17.62
  -8  -2  36    4.09    0.89
 -10   2  36    8.01    1.64
  -2  -8 -36   12.77    4.30
   2 -10 -36   14.65    3.86
  -8  10 -36    7.30    1.71
  -2  10  36    7.09    4.54
 -10   8 -36    2.04    2.22
  10  -2 -36   11.79    4.52
   2 -10 -36   10.44    3.18
  -2  -8 -36    7.98    3.00
  -8  -2  33  845.20   35.35
  -2  10  33  920.94   34.03
  -8  10 -33  952.96   43.43
 -10   8 -33  963.12   41.98
  10  -2 -33  998.84   42.93
   2 -10 -33  863.97   31.76
  -2  -8 -33  993.67   35.54
   2 -10 -33  911.31   33.72
  -8  -2  33  891.25   31.23
  -2  -8 -33  940.81   36.62
  -2  10  30  376.39   21.11
  -8  -2  30  367.55   23.47
  -8  10 -30  413.08   28.01
 -10   8 -30  400.84   26.46
  10  -2 -30  418.76   27.05
   2 -10 -30  375.36   20.03
   2 -10 -30  393.16   22.11
  -2  -8 -30  372.39   22.98
  -8  -2  30  397.65   20.92
  -2  10  27  180.95   14.42
  -8  -2  27  169.52   15.75
  -8  10 -27  193.75   18.71
 -10   8 -27  190.49   17.91
   8   2 -27  198.89   19.07
  10  -2 -27  202.13   18.58
   2 -10 -27  167.20   13.44
   2 -10 -27  176.24   14.90
  -2  -8 -27  169.05   15.26
  -8  -2  27  191.30   14.62
  -2  10  24  599.77   26.29
  -8  10 -24  679.56   34.41
 -10   8 -24  647.22   33.04
   8   2 -24  667.32   33.89
  10  -2 -24  645.40   33.08
   2 -10 -24  641.34   25.65
  -2  -8 -24  628.15   29.51
  -8  -2  24  670.19   27.90
   2 -10 -24  676.64   29.52
  -2  -8 -21    4.41    0.59
   2 -10 -21   10.21    3.66
 -10   8 -21    2.29    2.15
  -8  10 -21    6.73    1.43
  -2  10  21    4.28    2.87
   2 -10 -21    6.76    2.99
   8   2 -21    3.93    2.93
  -8  -2  21    7.71    4.58
  10  -2 -21   10.34    5.85
  -2  10  18  622.09   26.49
 -10   8 -18  634.29   30.73
  -8  10 -18  591.81   31.16
  10  -2 -18  600.73   32.38
   8   2 -18  612.62   31.23
  -2  -8 -18  556.39   27.89
   2 -10 -18  587.71   27.45
  -2  10  15 1421.65   39.53
  -8  10 -15 1417.47   46.98
 -10   8 -15 1469.78   44.63
  -8  10 -15 1494.19   46.97
 -10   8 -15 1438.78   45.93
   8   2 -15 1436.96   47.82
  10  -2 -15 1448.08   49.90
  -2  -8 -15 1363.86   43.33
   2 -10 -15 1443.42   43.49
  -2  10  12    5.59    2.99
 -10   8 -12    3.94    1.36
  -8  10 -12    6.90    2.96
   2 -10 -12    6.52    3.73
  -2  -8 -12    9.12    3.41
  10  -2 -12    4.77    2.96
   8   2 -12    6.41    3.59
  -8  10  -9  874.62   35.32
 -10   8  -9  895.96   34.13
 -10   2   9  927.02   29.62
  -2  -8  -9 1003.03   28.51
  -2  10   9  895.33   31.02
  10  -2  -9  886.81   40.04
   8   2  -9  908.35   37.56
   2 -10  -9  887.11   33.89
  -2  -8  -9  834.26   34.00
  -2  10   6   43.65    6.76
 -10   8  -6   37.52    7.13
  -8  10  -6   36.06    6.92
  -2  -8  -6   48.63    8.53
  -2  -8  -6   52.69    6.48
   8   2  -6   38.18    7.45
  10  -2  -6   38.23    8.47
   2 -10  -6   52.95    8.66
  -8  10  -3  424.09   23.93
  -2  10   3  450.50   22.30
 -10   8  -3  403.15   22.28
  -2  -8  -3  462.21   20.19
  10  -2  -3  406.82   26.44
   8   2  -3  433.84   25.65
  -2  -8  -3  411.92   24.00
   2 -10  -3  447.95   23.67
   2 -10  -3  415.14   20.43
  -2  10   0  186.98   14.67
  -2  -8   0  187.85   12.81
  -8  10   0  187.30   15.85
 -10   8   0  173.84   15.18
  10  -2   0  156.55   16.60
   8   2   0  188.61   16.85
  -2  -8   0  188.37   16.15
   2 -10   0  167.05   12.99
   2 -10   0  176.73   14.56
 -10   8   3  348.28   21.65
  -8  10   3  357.30   22.18
  -2  -8   3  364.89   18.35
  -2  10  -3  360.97   20.67
  10  -2   3  296.66   22.05
   8   2   3  324.57   22.22
  -2  -8   3  352.27   20.67
  -2  -8   3  348.09   22.01
   2 -10   3  365.19   20.66
 -10   2  -3  304.45   19.15
   2 -10   3  334.18   18.54
  -2  10  -6    9.40    3.26
 -10   8   6    5.32    1.39
  -8  10   6    6.54    2.79
  -2  10  -6    6.86    2.42
  -2  -8   6    7.81    3.08
  -2  -8   6   12.64    4.77
   2 -10   6    9.90    4.46
 -10   2  -6    6.24    2.64
   2 -10   6   10.17    3.83
  -2  -8   6    7.48    1.82
   8   2   6    7.29    1.61
  10  -2   6    2.79    2.22
  10  -8  -9 1170.57   31.86
  -8  10   9 1050.76   40.67
  -2  -8   9  990.31   31.68
 -10   8   9  991.94   36.14
  -2  10  -9  999.58   34.86
   2   8  -9  807.74   23.82
  10  -8  -9 1034.64   41.01
   8   2   9  930.38   36.08
  10  -2   9  869.91   36.66
   2 -10   9  957.46   32.62
 -10   2  -9  844.86   32.06
  -2  -8   9  989.72   36.64
   2 -10   9  948.08   32.76
  -2  -8   9 1056.60   36.44
  -2  -8  12   59.10    7.84
  10  -2  12   40.38    6.67
  -2  10 -12   61.01    8.64
   2   8 -12   50.98    6.13
  -8  10  12   53.55    9.27
 -10   8  12   45.67    8.33
  10  -2  12   49.16    9.58
   8 -10 -12   59.77    6.57
   2 -10  12   58.74    8.05
  -2  -8  12   60.72    9.34
  -2  -8  12   60.98    9.03
   8   2  12   49.45    7.78
  10  -8 -12   44.40    8.86
 -10   2 -12   51.99    8.21
  -8  10  15 1655.83   49.28
  -2  -8  15 1629.19   42.44
 -10   8  15 1584.50   47.92
  -2  10 -15 1676.23   46.84
   2   8 -15 1584.41   39.14
  10  -8 -15 1565.98   36.46
   8   2  15 1551.80   44.76
  10  -8 -15 1636.98   50.12
   8 -10 -15 1668.87   35.40
   8 -10 -15 1773.23   45.74
  -2  -8  15 1659.33   45.53
   2 -10  15 1635.37   41.91
 -10   2 -15 1476.06   44.04
  -2  -8  15 1621.87   44.72
 -10   8  18  552.73   30.19
  -2  -8  18  580.07   25.48
  -8  10  18  601.70   30.43
  -2  10 -18  589.95   28.53
   2   8 -18  555.74   23.86
  10  -8 -18  557.69   29.35
  10  -8 -18  533.69   21.79
   8   2  18  576.23   27.11
   8 -10 -18  578.45   21.66
  -8  -2 -18  625.12   30.37
   2 -10  18  567.38   24.28
  -2  -8  18  561.01   25.56
 -10   2 -18  485.68   25.12
  -2  -8  18  564.56   26.86
   2 -10  21   12.53    3.81
  -2  -8  21   12.07    3.61
  10  -2  21    8.29    2.70
  -8  -2 -21   20.55    6.61
  -2  -8  21   12.11    3.63
 -10   8  21    3.98    1.34
   2   8 -21    8.96    3.20
  -8  10  21    6.13    2.54
  -2  10 -21   13.36    3.64
   8 -10 -21   14.06    4.15
  10  -8 -21   14.98    3.48
  -8  -2 -21   17.90    5.83
  10  -8 -21   11.51    4.27
   8   2  21   10.78    3.58
  -2  -8  21   11.43    4.08
 -10   2 -21   10.06    2.45
  10  -2  24  335.29   20.17
 -10   8  24  485.69   28.93
  -8  10  24  468.49   28.71
  -2  -8  24  443.70   23.14
  -2  10 -24  451.45   26.51
   2   8 -24  445.11   22.99
   8   2  24  329.21   18.69
  10  -8 -24  415.24   20.71
  10  -8 -24  427.64   24.24
   8 -10 -24  419.13   19.88
  -2  -8  24  466.68   25.55
  -8  -2 -24  465.54   25.91
  -2  -8  24  401.29   20.07
 -10   2 -24  367.16   21.06
  -8  -2 -24  420.36   24.85
  10  -2  27   72.48    9.75
  -8  10  27   87.94   12.59
  -2  10 -27   83.96   11.52
   2   8 -27   87.51   10.43
  10  -8 -27   71.56    8.91
  10  -8 -27   76.94   10.34
   8 -10 -27   75.09    8.82
  -8  -2 -27   84.80   11.92
 -10   2 -27   57.17    7.94
  -8  -2 -27   76.62   10.80
  10  -2  30  434.04   24.85
  -8  10  30  548.35   32.10
  -2  10 -30  505.64   29.20
   2   8 -30  486.29   25.45
  10  -8 -30  478.69   25.51
  10  -8 -30  493.56   23.84
   8 -10 -30  478.16   21.95
  -8  -2 -30  516.69   26.89
  -8  -2 -30  485.35   27.08
  10  -2  33 1264.84   43.96
   2   8 -33 1320.28   43.24
  -2  10 -33 1375.22   49.45
  10  -8 -33 1303.50   39.44
   8 -10 -33 1246.63   37.05
  -8  -2 -33 1384.01   43.51
  -8  -2 -33 1316.50   45.16
  10  -2  36   11.47    5.97
  -8  -2 -36    9.89    4.03
   2   8 -36    7.32    3.57
  -2  10 -36    7.68    4.69
   8 -10 -36    7.71    3.39
  10  -8 -36   12.86    3.12
  -8  -2 -36   10.24    3.40
 -10   2 -36    9.27    3.37
  10  -2  39  332.26   23.78
   2   8 -39  313.40   22.22
  -2  10 -39  308.55   23.29
  10  -8 -39  306.24   19.69
   8 -10 -39  294.41   18.91
  -8  -2 -39  294.36   19.88
 -10   2 -39  219.86   15.21
  -8  -2 -39  314.54   19.82
  10  -2  42   67.73   11.24
   2   8 -42   60.39    9.45
  -2  10 -42   55.43   10.07
   8 -10 -42   48.48    8.22
  10  -8 -42   53.09    8.18
  -8  -2 -42   48.69    8.18
 -10   2 -42   32.33    5.37
  10  -2  45   51.71    9.43
   2   8 -45   48.43    9.27
  -2  10 -45   47.99   10.20
   8 -10 -45   53.96    7.55
  10  -8 -45   50.97    8.09
  -8  -2 -45   46.27    7.66
  10  -2  48   66.33   10.14
  -2  10 -48   55.68   10.19
   2   8 -48   62.07    9.93
   8 -10 -48   58.87    8.38
  10  -8 -48   56.39    8.68
  -8  -2 -48   54.02    8.32
  10  -2  51  278.90   23.52
  -2  10 -51  234.35   21.29
   2   8 -51  246.67   21.12
  10  -8 -51  226.47   18.22
   8 -10 -51  227.00   18.00
  -8  -2 -51  185.23   14.63
  10  -2  54   -2.28    2.80
  -2  10 -54   -2.85    3.54
   2   8 -54    5.09    4.18
   8 -10 -54   -1.65    2.79
  10  -8 -54    5.85    1.85
  -8  -2 -54   -0.84    2.85
  10  -2  57  275.22   23.49
  -9  -1  55   66.47   10.40
 -10   9 -55   80.41   13.73
 -10   1  52   86.65   11.92
  -9  -1  52   83.24   11.24
   1 -10 -52   82.23   11.41
  -1  -9 -52   89.62   12.29
  -9  10 -52   95.36   14.75
 -10   9 -52   90.90   13.17
  -9  -1  49  259.24   20.46
 -10   1  49  262.38   20.49
   1 -10 -49  264.90   20.10
  -1  -9 -49  298.13   23.32
  -9  10 -49  295.79   25.51
 -10   9 -49  269.15   25.09
 -10   1  46  460.97   26.28
  -9  -1  46  464.69   27.33
   1 -10 -46  500.20   27.16
  -1  -9 -46  553.72   31.34
  -9  10 -46  529.39   34.19
 -10   9 -46  490.32   32.59
 -10   1  43   65.65   10.45
  -9  -1  43   56.53    8.55
  -1  -9 -43   68.08    9.34
   1 -10 -43   61.97    8.74
  -9  10 -43   65.60   12.08
 -10   9 -43   68.27   12.42
   1 -10 -43   53.35    8.49
  -1  -9 -43   66.61   10.28
 -10   1  40   16.79    5.00
  -9  -1  40    8.76    3.19
   1 -10 -40   12.34    4.23
  -1  -9 -40    9.95    2.57
 -10   9 -40   12.31    4.31
  -9  10 -40   15.38    5.89
  -1  -9 -40   14.41    3.18
   1 -10 -40   15.54    4.16
  -1  -9 -40   13.52    0.82
 -10   1  37  430.97   25.04
  -9  -1  37  427.23   25.71
  -9  10 -37  517.69   32.76
 -10   9 -37  484.90   31.13
  10  -1 -37  523.67   31.96
   1 -10 -37  448.82   24.45
  -1  -9 -37  499.37   25.19
   1 -10 -37  469.60   24.53
  -1  -9 -37  455.60   24.64
  -1  -9 -34   34.65    6.92
 -10   1  34   26.31    6.63
   1 -10 -34   32.95    6.14
  -9  -1  34   26.04    6.96
  -9  10 -34   19.18    6.35
 -10   9 -34   28.77    7.96
  10  -1 -34   26.85    7.57
   1 -10 -34   29.75    6.83
  -1  -9 -34   27.88    6.03
  -9  -1  31  206.67   17.00
  -1  10  31  170.88   14.03
  -9  10 -31  204.02   19.85
 -10   9 -31  197.14   19.82
   9   1 -31  218.95   20.53
  10  -1 -31  206.94   19.78
   1 -10 -31  232.02   16.91
  -1  -9 -31  243.67   18.07
   1 -10 -31  250.77   17.98
  -1  10  28  285.61   17.83
  -9  10 -28  296.38   23.53
 -10   9 -28  303.20   23.61
   9   1 -28  321.88   24.65
  10  -1 -28  304.42   23.43
   1 -10 -28  298.75   19.59
  -1  -9 -28  291.71   19.93
   1 -10 -25   37.63    6.83
  -1  -9 -25   40.92    7.28
  -9  10 -25   35.24    8.52
 -10   9 -25   37.68    9.10
  -1  10  25   38.42    6.38
  10  -1 -25   40.83    8.62
   9   1 -25   42.80    8.62
   1 -10 -22    3.84    1.85
  -1  -9 -22   10.73    3.95
 -10   9 -22    8.42    4.18
  -9  10 -22    9.60    4.34
  -1  10  22    6.15    3.02
   9   1 -22    5.77    1.50
  10  -1 -22    8.68    3.72
  -1  10  19 1219.67   35.32
 -10   9 -19 1272.62   45.12
  -9  10 -19 1279.77   45.72
   9   1 -19 1283.42   47.03
  10  -1 -19 1321.71   47.97
   1 -10 -19 1219.02   40.28
  -1  -9 -19 1175.61   40.49
 -10   9 -16   24.39    7.22
  -9  10 -16   16.10    6.23
  -1  10  16   23.37    4.42
 -10   9 -16   21.98    4.66
  -9  10 -16   18.77    5.15
   1 -10 -16   30.73    6.24
  -1  -9 -16   28.03    5.44
   9   1 -16   20.53    6.03
  10  -1 -16   21.34    6.23
  -1  10  13   24.54    5.06
 -10   9 -13   27.99    6.15
  -9  10 -13   22.65    6.59
  -1  -9 -13   44.50    7.92
   1 -10 -13   44.97    8.07
   9   1 -13   28.41    7.10
  10  -1 -13   25.55    6.51
  -9  10 -10  892.58   36.68
 -10   9 -10  934.09   36.41
  -1  10  10  920.00   30.61
   9   1 -10  955.94   39.61
  10  -1 -10  915.87   41.03
  -1  -9 -10  897.96   35.69
   1 -10 -10  892.11   34.62
   1   9   7   71.44    7.45
  -1  10   7   71.97    8.43
  -9  10  -7   73.04   10.40
 -10   9  -7   58.93    9.34
   9   1  -7   79.91   11.52
  10  -1  -7   68.20   11.09
   1 -10  -7   80.89   10.35
  -1  -9  -7   67.67    9.73
   1   9   4  321.58   16.66
 -10   9  -4  280.83   19.41
  -9  10  -4  311.19   20.54
  -1  10   4  305.55   17.84
  -1  -9  -4  330.56   16.39
  10  -1  -4  301.70   23.53
   9   1  -4  308.80   22.58
  -1  -9  -4  306.09   20.70
   1 -10  -4  304.13   19.99
   1 -10  -4  312.94   18.86
  -1  10   1 1104.83   34.39
  -1  -9  -1 1176.24   31.19
  -9  10  -1 1086.77   38.58
 -10   9  -1 1086.79   37.75
   1   9   1 1088.03   30.62
  10  -1  -1 1006.10   42.03
   9   1  -1 1061.68   41.60
   1 -10  -1 1105.81   37.96
  -1  -9  -1 1107.63   39.40
   1 -10  -1 1094.20   35.06
 -10   9   2 1280.01   41.95
  -9  10   2 1286.88   42.94
  -1  -9   2 1395.73   35.18
  -1  10  -2 1323.71   38.25
   9   1   2 1178.91   43.03
  10  -1   2 1191.64   44.37
   1 -10   2 1316.45   41.06
  -1  -9   2 1352.44   43.11
   1 -10   2 1244.63   36.65
  -1  -9   2 1331.98   40.33
 -10   9   5   57.69    9.97
  -9  10   5   68.93   10.60
  -1  -9   5   67.44    7.98
  -1  10  -5   68.20    8.41
   1   9  -5   68.69    8.21
  -1  10  -5   66.45    8.45
   9   1   5   61.31   10.41
  10  -1   5   57.59    9.77
  -1  -9   5   61.73    9.27
   1 -10   5   63.41    8.52
   1 -10   5   59.40    8.57
  -1  -9   5   66.94   10.24
  -9  10   8    9.69    5.16
 -10   9   8    4.71    1.25
  -1  10  -8    4.76    2.12
   1   9  -8    7.70    2.30
  -1  -9   8    9.41    3.77
  -1  -9   8    8.51    3.50
   1 -10   8    9.90    3.32
 -10   1  -8   10.72    4.03
  -1  -9   8    8.42    1.82
   1 -10   8    4.01    1.57
   9   1   8    4.80    2.16
  10  -1   8    3.71    3.24
  10  -9  -8    3.48    0.43
  -9  10  11  559.65   28.90
  -1  -9  11  565.91   23.95
 -10   9  11  556.76   27.96
  -1  10 -11  581.92   26.30
   1   9 -11  612.63   26.43
  10  -9 -11  577.89   30.57
   9   1  11  487.57   26.79
  10  -1  11  509.80   28.10
   1 -10  11  540.64   24.84
  -1  -9  11  564.66   27.04
 -10   1 -11  508.84   26.56
  -1  -9  11  532.86   25.59
   1 -10  11  550.21   25.60
  -1  -9  14   13.73    4.15
  -1  -9  14   21.42    4.43
   1 -10  14   14.59    3.23
  -1  10 -14   16.05    5.19
 -10   9  14   15.35    5.00
   1   9 -14   17.40    3.51
  -9  10  14   10.76    3.37
  10  -9 -14   18.80    3.98
   9 -10 -14   18.11    3.35
   9   1  14   14.73    4.78
  -1  -9  14   19.33    3.48
   1 -10  14   20.10    4.57
   9 -10 -14   13.81    5.05
  10  -1  14    8.54    2.09
  10  -9 -14   15.06    5.38
 -10   1 -14   15.35    4.86
 -10   9  17  513.40   28.05
  -9  10  17  495.42   28.17
  -1  10 -17  536.90   27.06
   1   9 -17  529.03   25.26
  10  -9 -17  503.68   27.22
  10  -1  17  396.17   22.59
   9 -10 -17  552.28   26.79
  10  -9 -17  502.95   20.62
   9 -10 -17  534.93   21.03
   9   1  17  445.78   25.96
   1 -10  17  504.31   23.04
 -10   1 -17  498.54   26.64
  -1  -9  17  502.13   24.08
  -9  -1 -17  516.64   28.01
  -1  -9  17  550.50   27.44
  -9  10  20  467.49   28.47
 -10   9  20  517.21   29.34
  -1  10 -20  509.71   27.45
   1   9 -20  542.85   26.68
   9   1  20  439.05   24.82
  10  -9 -20  514.79   27.25
  10  -9 -20  475.78   21.23
   9 -10 -20  470.91   20.92
  -1  -9  20  518.95   26.65
  -9  -1 -20  470.50   26.14
 -10   1 -20  457.36   25.98
  -1  -9  20  458.81   22.10
   1 -10  20  449.74   21.60
  10  -1  23   80.92    8.97
 -10   9  23  111.98   14.69
  -9  10  23  123.08   14.27
  -1  10 -23  114.68   12.74
   1   9 -23  122.15   12.37
   9   1  23   78.59    8.74
  10  -9 -23   99.81   10.11
   9 -10 -23  109.03   10.06
  10  -9 -23  105.83   12.05
 -10   1 -23   99.16   11.83
  -9  -1 -23  109.10   13.15
  -1  -9  23   92.82    9.58
  10  -1  26    6.74    2.70
  -9  -1 -26    2.12    1.71
  -1  10 -26    7.08    4.07
   1   9 -26    5.68    0.73
 -10   9  26    9.24    5.20
  -9  10  26    5.69    2.53
   9 -10 -26    6.87    2.82
  10  -9 -26    4.61    2.58
  10  -9 -26    5.76    2.39
   9   1  26    5.11    2.94
 -10   1 -26    7.13    3.04
  -9  -1 -26    0.63    3.69
  10  -1  29  839.56   32.51
 -10   9  29 1206.16   48.87
  -9  10  29 1239.58   48.14
  -1  10 -29 1166.60   44.14
   1   9 -29 1156.71   41.69
  10  -9 -29 1077.19   34.82
   9 -10 -29 1068.37   33.54
  -9  -1 -29 1236.59   42.46
 -10   1 -29  946.78   35.45
  -9  -1 -29 1123.74   42.22
  -9  -1 -32   63.12    9.86
  10  -1  32   41.69    7.32
  -1  10 -32   58.48   10.37
   1   9 -32   64.46   10.03
  -9  10  32   60.27   11.76
   9 -10 -32   49.32    7.66
  10  -9 -32   52.72    8.17
  -9  -1 -32   55.27    9.61
 -10   1 -32   45.40    7.64
  10  -1  35   25.39    6.84
  -9  -1 -35   33.63    7.76
  -1  10 -35   23.02    5.82
   1   9 -35   31.70    8.26
   9 -10 -35   28.46    5.89
  10  -9 -35   24.41    5.19
  -9  -1 -35   32.67    6.41
 -10   1 -35   25.89    5.89
  10  -1  38  602.10   30.38
   1   9 -38  685.61   34.45
  -1  10 -38  614.77   32.17
  10  -9 -38  596.20   27.24
   9 -10 -38  607.54   27.16
 -10   1 -38  467.10   24.07
  -9  -1 -38  737.26   32.00
  -9  -1 -38  547.21   27.38
  10  -1  41    9.10    5.84
   1   9 -41    5.87    3.10
  -1  10 -41    4.03    3.38
   9 -10 -41    8.04    4.65
  10  -9 -41    5.30    3.28
 -10   1 -41    1.90    1.24
  -9  -1 -41    1.63    2.35
  10  -1  44  114.89   13.86
   1   9 -44  114.15   14.40
  -1  10 -44  108.88   13.75
  10  -9 -44  100.19   11.55
   9 -10 -44  105.66   12.05
 -10   1 -44   73.64    9.03
  -9  -1 -44   88.05   10.55
  10  -1  47  543.95   30.73
  -1  10 -47  507.80   30.20
   1   9 -47  559.43   33.06
  10  -9 -47  512.10   26.70
   9 -10 -47  527.32   26.43
 -10   1 -47  358.50   19.38
  -9  -1 -47  417.40   22.61
  10  -1  50  211.09   19.60
  -1  10 -50  177.60   18.44
   1   9 -50  195.71   20.08
  10  -9 -50  188.44   16.48
   9 -10 -50  185.00   16.13
  -9  -1 -50  149.62   12.99
  10  -1  53   31.29    6.36
  -1  10 -53   22.99    4.37
   1   9 -53   31.55    8.19
  10  -9 -53   15.21    2.91
   9 -10 -53   21.01    5.90
  -9  -1 -53   12.63    2.29
  10  -1  56   44.87    9.08
 -10   0  56   57.61    9.73
 -10   0  53    5.59    0.68
 -10   0  50   -2.42    3.33
   0 -10 -50    2.52    2.36
 -10   0  47   -6.36    5.67
   0 -10 -47   -1.60    5.10
 -10  10 -47   -1.16    4.09
 -10   0  44    1.14    5.12
   0 -10 -44    4.80    1.56
   0 -10 -44    7.91    3.75
 -10  10 -44    3.49    1.45
   0 -10 -41    6.13    4.09
 -10  10 -41   -1.02    4.02
   0 -10 -41    7.69    3.69
 -10   0  38  207.15   18.14
 -10  10 -38  223.40   21.66
   0 -10 -38  206.04   17.64
   0 -10 -38  202.61   16.40
   0 -10 -35    1.45    1.46
 -10   0  35   -2.51    5.96
 -10  10 -35    0.98    3.29
   0 -10 -35   -2.04    4.54
  10   0 -35   -3.98    4.17
 -10  10 -32  211.19   20.08
  10   0 -32  234.90   21.35
   0 -10 -32  214.10   16.98
   0 -10 -29    4.28    2.05
 -10  10 -29    4.49    2.18
  10   0 -29    1.54    2.19
 -10  10 -26  483.88   30.31
  10   0 -26  476.32   29.41
   0 -10 -26  437.12   24.31
   0 -10 -23    3.56    2.39
 -10  10 -23   -0.85    2.84
  10   0 -23    3.61    3.90
 -10  10 -20   82.01   11.90
  10   0 -20   73.45   11.67
   0 -10 -20   99.87   11.67
 -10  10 -17    1.98    2.49
 -10  10 -17    1.96    3.03
   0 -10 -17    4.35    2.11
  10   0 -17   -1.86    3.23
   0  10  14   21.11    4.55
 -10  10 -14   14.81    4.38
   0 -10 -14   24.40    5.63
  10   0 -14   14.80    6.25
   0  10  11    3.12    1.62
 -10  10 -11    3.81    3.03
   0 -10 -11    4.16    1.59
  10   0 -11    1.00    2.06
 -10  10  -8  176.86   16.68
   0  10   8  199.96   14.03
  10   0  -8  209.39   19.31
   0 -10  -8  199.22   16.78
 -10  10  -5    3.16    1.11
   0  10   5    1.54    0.59
   0 -10  -5    4.33    2.74
  10   0  -5    1.02    1.45
 -10  10  -2   24.44    5.82
   0  10   2   28.15    5.33
   0 -10  -2   36.01    6.70
  10   0  -2   20.20    6.69
   0  10  -1    2.19    1.01
 -10  10   1    2.03    2.23
   0  10  -1    3.41    1.46
   0 -10   1    2.26    1.05
   0 -10   1    2.82    1.55
  10   0   1   -0.10    2.18
   0  10  -4   17.02    4.13
 -10  10   4   18.49    5.50
   0 -10   4   15.71    4.56
   0 -10   4   13.03    4.11
  10   0   4   12.11    4.30
   0  10  -7    2.15    2.20
 -10  10   7   -0.24    0.55
   0 -10   7    1.31    2.02
  10   0   7    1.80    0.63
   0 -10   7   -1.62    2.32
 -10  10  10  908.25   36.82
   0  10 -10  906.18   32.48
  10 -10 -10  963.72   39.32
  10   0  10  819.25   35.72
   0 -10  10  825.72   32.14
   0 -10  10  846.72   32.62
 -10  10  13   -0.26    4.33
   0  10 -13    1.90    2.88
   0 -10  13    2.70    2.32
 -10   0 -13    6.87    2.73
   0 -10  13    3.70    2.66
  10   0  13   -2.31    1.32
  10 -10 -13    1.02    1.79
 -10  10  16  253.62   20.42
   0  10 -16  302.54   20.16
  10 -10 -16  275.45   15.10
  10 -10 -16  297.73   21.11
  10   0  16  268.01   20.83
 -10   0 -16  270.41   19.97
   0 -10  16  283.58   19.14
   0 -10  16  249.27   16.67
   0 -10  19    2.42    2.38
   0  10 -19    2.00    2.79
 -10  10  19    2.43    1.23
  10 -10 -19    2.81    1.54
   0 -10  19    3.92    2.91
  10   0  19   -0.36    0.33
  10 -10 -19    0.60    0.83
 -10   0 -19    5.27    3.35
 -10  10  22  424.59   27.40
   0  10 -22  439.95   25.48
  10 -10 -22  396.77   19.78
   0 -10  22  354.79   19.19
 -10   0 -22  389.91   24.57
   0  10 -25   -0.80    1.65
 -10  10  25   -0.11    3.97
  10 -10 -25   -0.02    1.62
  10   0  25    0.97    1.00
 -10   0 -25   -4.27    4.32
   0  10 -28   25.76    6.07
 -10  10  28   20.72    6.48
  10 -10 -28   28.82    4.60
 -10   0 -28   34.14    7.07
 -10   0 -31   -3.92    3.61
   0  10 -31    2.15    1.22
 -10  10  31    3.22    3.74
  10 -10 -31    0.31    1.84
 -10   0 -31   -1.30    3.08
 -10   0 -34   12.06    3.33
   0  10 -34    7.85    4.14
 -10  10  34    6.03    4.93
  10 -10 -34   13.31    3.38
 -10   0 -34   13.51    3.79
 -10   0 -37    2.27    1.82
   0  10 -37    4.42    0.99
  10 -10 -37   -3.23    3.35
 -10   0 -37    0.11    2.87
   0  10 -40   34.25    7.95
  10 -10 -40   28.98    5.62
 -10   0 -40   21.09    4.99
   0  10 -43   -2.63    2.72
  10 -10 -43   -2.64    1.76
 -10   0 -43   -1.85    2.80
   0  10 -46   10.23    4.21
  10 -10 -46    9.87    1.83
 -10   0 -46   11.64    4.47
   0  10 -49   -0.64    2.70
  10 -10 -49    3.63    1.21
 -10   0 -49    0.39    1.74
   0  10 -52   21.04    6.80
  10 -10 -52   17.18    2.67
   6   5 -56  215.35   20.46
  -5  -6 -56  174.74   14.29
  11  -6  53   27.47    8.64
   6   5 -53   11.76    4.91
   5 -11 -53   16.67    4.91
  -5  -6 -53   16.64    3.43
  11  -6  50   23.46    9.19
  -6  11 -50    9.51    4.90
   6   5 -50   17.98    5.85
   5 -11 -50   10.73    3.87
  11  -5 -50   11.37    4.42
  -5  -6 -50   12.51    3.11
  11  -6  47    3.68    5.27
  -6  11 -47   -2.50    3.78
   6   5 -47    5.31    2.98
   5 -11 -47    1.99    2.12
  11  -5 -47   -1.45    2.94
  -6  -5  47   -0.87    4.22
  -5  -6 -47    5.15    1.63
  11  -6  44   19.46    8.39
  -6  -5  44    6.94    1.43
  -6  11 -44   12.58    5.35
   6   5 -44    8.55    4.67
  -5  11  44    2.02    5.89
   5 -11 -44   11.31    3.89
  11  -5 -44   12.48    5.63
  -5  -6 -44    9.53    3.17
  -6  -5  44   11.75    3.65
  -6  -5  41   47.95    8.98
  11  -6  41   59.80   11.53
  -5  -6 -41   45.39    7.54
  -6  11 -41   49.59   10.64
 -11   6 -41   35.22    7.18
  -5  11  41   36.42    8.55
  11  -5 -41   38.16    8.74
   5 -11 -41   49.38    7.58
  11  -5 -41   43.46    7.54
  -6  -5  41   51.66    8.40
  -5  -6 -41   46.44    8.32
  -6  -5  38  137.71   14.82
  -5  11  38  145.56   15.44
  -6  11 -38  135.41   16.25
 -11   6 -38  112.90   13.53
  11  -5 -38  144.41   16.64
   5 -11 -38  137.53   13.17
  11  -5 -38  144.75   14.26
  -5  -6 -38  123.22   13.08
  -5  -6 -38  145.98   14.18
  -6  -5  38  145.02   14.45
  -6  -5  35    3.43    2.84
  -5  -6 -35    2.82    0.54
 -11   6 -35    7.10    4.17
  -5  11  35    1.38    3.13
  -6  11 -35   -2.56    3.80
  11  -5 -35   -1.81    2.49
   5 -11 -35   -1.06    3.46
  11  -5 -35    4.52    1.92
  -5  -6 -35    6.01    1.01
  -6  -5  35   -0.01    2.78
  -6  -5  32   -2.26    4.33
  -5  -6 -32    3.61    2.10
  -5  11  32    2.38    2.08
  -6  11 -32    4.42    4.82
 -11   6 -32    9.12    5.20
   5 -11 -32    2.16    2.82
  11  -5 -32    1.40    1.05
  11  -5 -32   -1.09    2.98
  -5  -6 -32    3.59    0.72
  -6  -5  32    4.37    2.75
  -6  -5  29   16.77    2.07
  -5  -6 -29   21.12    6.03
  -5  11  29   26.84    6.01
  -6  11 -29   22.90    6.55
 -11   6 -29   17.75    4.32
   5 -11 -29   19.60    4.29
  -6  -5  29   27.37    5.89
  11  -5 -29   20.84    4.87
  -6  -5  26    9.83    4.99
  -5  -6 -26    5.90    1.82
  -6  -5  26    7.35    3.66
  -5  11  26    5.75    2.72
  -6  11 -26   10.84    4.00
 -11   6 -26    6.00    2.69
   5 -11 -26    9.82    3.41
  -6  -5  26    9.69    2.62
  11  -5 -26    7.20    1.33
  -6  -5  23   39.98    7.97
  11  -6  23   47.26   10.07
  -6  -5  23   32.18    6.29
  -5  -6 -23   42.75    7.60
  -6  11 -23   27.93    6.63
 -11   6 -23   25.80    6.16
  -5  11  23   33.25    6.96
   5 -11 -23   37.64    6.47
  -6  -5  23   42.13    7.83
  11  -5 -23   26.40    6.65
  11  -6  20  898.70   38.72
  -6  -5  20  750.69   33.17
  -5  11  20  753.74   32.67
  -6  11 -20  767.86   35.88
 -11   6 -20  723.97   31.46
   5 -11 -20  821.40   27.42
  11  -5 -20  723.49   35.26
  -5  -6 -20  884.07   40.44
  -6  -5  20  766.30   35.88
  -6  -5  20  750.01   31.00
  -6  -5  17    7.17    3.53
  11  -6  17    7.60    4.99
  -6  -5  17    6.33    3.92
  -5  -6 -17   12.80    4.16
 -11   6 -17    2.32    2.33
  -6  11 -17    4.84    0.94
 -11   5  17    5.73    1.36
  -5  11  17    6.44    2.61
   5 -11 -17    7.51    3.73
  -6  -5  17    2.32    1.16
  11  -5 -17    2.41    2.19
  11  -6  14  526.29   26.10
  -5  11  14  561.51   28.83
 -11   5  14  501.67   26.76
 -11   6 -14  496.27   25.48
  -6  11 -14  535.24   28.85
 -11   6 -14  502.55   23.53
  -6  11 -14  534.00   28.40
  11  -5 -14  509.37   30.22
  -6  -5  14  562.42   32.10
  -5  -6 -14  641.01   36.28
  -6  -5  14  524.92   26.11
  11  -6  11  105.82   10.93
  -5  11  11  114.51   12.69
 -11   6 -11  101.60   10.49
 -11   5  11  105.67   12.45
  -6  11 -11  107.67   12.65
   6   5 -11  102.96   11.27
  11  -5 -11   98.59   13.25
  -6  -5  11  119.37   15.44
  -5  -6 -11  137.82   16.70
  11  -6   8  889.04   31.03
  -6  11  -8 1043.11   38.83
 -11   6  -8 1016.01   33.43
 -11   5   8 1019.20   34.15
  -5  11   8 1044.00   38.25
   6   5  -8 1017.52   36.37
   5   6   8 1035.41   30.53
  11  -5  -8  978.48   41.41
  -6  -5   8 1145.25   48.11
  -5  -6  -8 1111.19   46.48
   5 -11  -8 1129.80   31.63
  11  -6   5   23.46    4.63
  -5  -6  -5   28.47    7.33
  -6  -5   5   31.52    9.04
  -5  11   5   22.78    5.50
 -11   5   5   25.25    5.35
 -11   6  -5   26.15    6.20
  -6  11  -5   22.56    5.81
   6   5  -5   30.54    5.77
   5   6   5   27.39    4.97
   5 -11  -5   28.18    5.39
  11  -5  -5   26.92    6.96
  11  -6   2    7.08    2.95
  11  -5  -2   10.48    1.29
  -6  -5   2   13.41    6.14
  -5  -6  -2    9.29    1.78
 -11   5   2    9.06    3.47
 -11   6  -2    5.64    1.88
  -5  11   2    3.26    2.82
  -6  11  -2    7.04    3.51
   6   5  -2    4.32    2.55
   5   6   2    8.27    2.83
   5 -11  -2    4.31    2.24
  11  -5  -2    5.94    3.67
 -11   5   2    9.07    3.50
  11  -6  -1    5.02    2.34
  11  -5   1    3.28    0.96
  -6  -5  -1    6.88    1.61
  -5  -6   1    5.72    3.00
 -11   6   1    3.90    2.30
 -11   5  -1    8.01    2.60
  -6  11   1    5.06    3.27
  -5  11  -1   11.67    4.79
   5   6  -1    5.15    3.25
   6   5   1    5.39    2.27
   5 -11   1    7.63    2.32
   6 -11  -1   10.59    2.63
  11  -5   1    2.88    1.16
 -11   5  -1    4.64    0.95
  11  -6  -1    5.92    3.92
 -11   6   4   61.46    8.52
 -11   5  -4   52.57    7.20
  -5  11  -4   61.69    9.60
  11  -5   4   49.76    7.02
  11  -6  -4   79.79   10.80
  -6  11   4   58.75    9.33
   5   6  -4   55.36    7.78
   6   5   4   64.72    8.37
 -11   5  -4   91.54   10.76
  -6  -5  -4   76.85   12.93
  -5  -6   4   68.63   10.65
  11  -6  -4   50.33    9.24
  11  -5   4   44.29    8.57
   6 -11  -4   64.64    7.66
  11  -5   7   74.67    8.74
  -5  11  -7  100.12   12.23
 -11   5  -7   91.37    9.31
  11  -6  -7  108.78   11.78
 -11   6   7   86.87   10.20
  -6  11   7  102.42   11.97
   6   5   7   90.99   10.28
  11  -6  -7   83.38   12.47
 -11   5  -7  134.91   13.10
  -6  -5  -7  110.42   14.03
   6 -11  -7  101.09    9.19
  -5  -6   7   98.96   13.02
  11  -5  10  314.56   17.97
  -6  11  10  434.17   25.64
 -11   6  10  401.11   22.78
 -11   5 -10  391.93   19.43
  -5  11 -10  405.93   24.77
  11  -6 -10  376.08   26.15
   6   5  10  436.47   21.50
 -11   5 -10  512.99   26.20
  -6  -5 -10  436.80   27.77
  -5  -6  10  399.50   25.52
  -5  -6  10  420.90   23.28
 -11   5 -13   16.90    5.30
  -5  11 -13   19.15    5.09
 -11   6  13   13.20    4.50
  -6  11  13   15.66    5.65
  -5  11 -13   14.07    3.94
  -6  -5 -13   11.61    4.24
  11  -5  13   10.83    3.08
  -5  -6  13   12.41    3.22
  -5  -6  13   13.08    4.67
  -5  -6  13   20.13    5.13
  11  -6 -13   10.36    3.24
 -11   5 -13   14.22    4.38
 -11   5 -16    6.55    1.96
  -5  11 -16   10.94    5.09
 -11   6  16    7.41    3.02
  -6  11  16   10.32    3.31
  11  -5  16    5.55    1.03
  -6  -5 -16   14.77    4.59
  -5  -6  16   18.39    4.77
  -5  -6  16   10.32    2.40
  -5  -6  16   13.95    4.67
 -11   5 -16   20.40    5.77
  11  -6 -16    9.56    4.26
  -5  -6  19   34.06    6.99
  11  -5  19   22.85    5.43
  -5  -6  19   21.30    5.16
  -6  -5 -19   16.26    3.08
  -5  11 -19   23.75    6.05
 -11   5 -19   15.81    3.31
 -11   6  19   23.95    6.01
  -6  11  19   22.98    6.52
   6 -11 -19   23.95    4.68
  -5  -6  19   29.09    6.59
  11  -6 -19   25.24    6.62
 -11   5 -19   26.40    5.41
  -5  -6  22   72.87    9.52
  11  -5  22   78.51   10.88
  -6  11  22   77.15   10.90
  -5  11 -22   76.82   11.16
 -11   5 -22   60.34    8.38
   6 -11 -22   74.25    8.23
  11  -6 -22   66.69   10.91
  -5  -6  22   75.19   10.57
  -6  -5 -22   62.79    9.53
  -5  -6  22   74.35   10.31
  -5  -6  25   47.53    8.07
  11  -5  25   52.73    9.63
  -6  -5 -25   43.91    7.89
  -5  -6  25   45.63    8.65
  -5  11 -25   47.24    9.02
  -6  11  25   32.71    6.92
 -11   5 -25   37.29    6.71
   6 -11 -25   50.99    6.75
  11  -6 -25   44.46    7.05
  -5  -6  25   53.99    7.86
  11  -6 -25   40.35    7.96
  11  -5  28  631.02   33.33
  -5  -6  28  562.20   28.72
  -6  11  28  580.16   30.81
  -5  11 -28  597.73   33.25
   6 -11 -28  579.44   24.62
  11  -6 -28  563.74   29.82
  11  -6 -28  572.32   26.92
  -6  -5 -28  602.62   29.52
  -6  -5 -28  509.93   26.75
  -5  -6  28  589.43   28.57
  -5  -6  31    8.22    4.21
  11  -5  31   10.21    2.28
  -6  -5 -31    7.83    3.68
  -6  11  31    6.93    3.59
  -5  11 -31    3.81    2.80
   6 -11 -31    6.70    2.11
  11  -6 -31    2.78    1.36
  -6  -5 -31    5.78    2.71
  -5  -6  31    8.30    4.29
  11  -6 -31    5.24    1.99
  11  -5  34  480.35   30.22
  -6  11  34  431.92   27.58
  -5  -6  34  436.44   26.68
  -5  11 -34  432.10   29.01
   6 -11 -34  414.96   22.05
  11  -6 -34  386.74   25.35
  11  -6 -34  416.80   23.40
  -6  -5 -34  413.66   24.51
  -6  -5 -34  361.98   21.59
  -5  -6  34  454.89   26.29
  -5  -6  37   35.04    4.91
  -6  -5 -37   28.97    5.46
  11  -5  37   41.03    7.23
  -5  11 -37   32.51    7.90
   5   6 -37   40.46    7.30
  -6  11  37   32.82    7.53
   6 -11 -37   37.57    6.75
  11  -6 -37   35.30    6.53
  11  -6 -37   37.87    8.17
  -5  -6  37   44.27    8.72
  -6  -5 -37   34.84    7.40
  11  -5  40  289.93   24.23
  -6  11  40  269.32   22.74
  -5  -6  40  253.25   20.35
  -5  11 -40  259.44   23.56
   5   6 -40  227.14   18.62
   6 -11 -40  248.19   17.41
  11  -6 -40  258.36   21.15
  11  -6 -40  248.18   18.53
  -5  -6  40  304.29   22.47
  -6  -5 -40  267.97   20.08
  -6  -5 -40  221.24   16.27
  11  -5  43    6.61    3.48
  -5  11 -43    1.53    0.73
  -6  11  43    3.73    0.55
   5   6 -43    4.77    4.55
   6 -11 -43    3.23    0.94
  11  -6 -43   -2.24    2.41
  11  -6 -43    3.69    1.92
  -5  -6  43    3.63    4.02
  -6  -5 -43    4.62    1.71
  11  -5  46   10.25    3.02
  -5  11 -46    7.49    3.18
   5   6 -46    7.55    4.17
   6 -11 -46    8.58    4.37
  11  -6 -46    1.02    4.73
  -6  -5 -46    6.02    2.99
  11  -5  49   -2.56    5.43
  -5  11 -49    1.07    6.09
   5   6 -49    0.03    2.42
   6 -11 -49    0.13    1.32
  11  -6 -49    2.17    2.16
  -6  -5 -49    0.67    2.09
  11  -5  52   12.99    5.45
   5   6 -52   24.58    7.62
  -5  11 -52   17.62    6.38
   6 -11 -52   15.87    5.24
  11  -6 -52   11.36    2.99
  -6  -5 -52    8.21    1.14
   5   6 -55   28.90    8.65
   6 -11 -55   18.17    2.87
  -6  -5 -55   20.08    4.41
   4 -11 -54   17.12    3.89
  -4  -7 -54   14.01    3.51
  -7  11 -51  142.53   18.05
 -11   7 -51  128.82   15.27
   4 -11 -51  138.82   14.36
  11  -4 -51  135.46   14.26
  -4  -7 -51  105.69   11.64
  -4  -7 -51  142.10   13.18
  -7  -4  48  176.15   17.45
  -7  11 -48  181.10   20.38
 -11   7 -48  167.45   17.35
   4 -11 -48  165.76   14.70
  11  -4 -48  169.88   15.77
  -4  -7 -48  163.26   14.60
  -7  -4  45   15.25    1.98
  -7  11 -45   20.82    7.08
 -11   7 -45   14.10    5.37
  -4  11  45   12.19    3.85
   4 -11 -45   18.16    5.29
  11  -4 -45   14.05    4.37
  -4  -7 -45   11.76    1.31
  -4  -7 -42    4.55    0.71
  -7  -4  42    0.62    2.11
 -11   4  42    4.88    2.32
  -7  11 -42    7.20    5.07
 -11   7 -42    6.31    4.35
  -4  11  42    5.04    4.16
   4 -11 -42    5.36    3.46
  11  -4 -42   -1.81    2.64
  11  -4 -42   -1.66    4.23
  -4  -7 -42    0.84    1.52
  -7  -4  42    0.49    2.86
  -7  -4  39   10.26    4.05
  -4  -7 -39    8.90    3.07
 -11   4  39    6.47    0.50
 -11   7 -39   11.14    5.41
  -4  11  39    7.10    3.28
  -7  11 -39    3.12    1.22
  11  -4 -39   13.85    4.98
  11  -4 -39   11.07    3.71
   4 -11 -39    7.74    1.66
  -7  -4  39   14.73    4.30
  -4  -7 -39   11.89    3.74
  -4  11  36  480.76   26.95
  -7  -4  36  426.37   25.44
  -7  11 -36  464.44   31.33
 -11   7 -36  414.59   26.11
  11  -4 -36  473.33   29.46
   4 -11 -36  423.65   22.63
  11  -4 -36  430.47   24.68
  -4  -7 -36  466.24   27.80
  -4  -7 -36  452.56   24.69
  -7  -4  36  434.30   23.80
  -4  11  33  299.41   21.15
   4 -11 -33  324.85   20.08
  -7  -4  33  282.12   20.81
  -7  11 -33  320.72   25.21
 -11   7 -33  275.40   21.37
  11  -4 -33  329.10   24.06
   4 -11 -33  312.35   19.08
  -4  -7 -33  326.94   21.23
  -4  -7 -33  366.78   25.66
  -7  -4  33  314.25   19.88
  -4  -7 -30   11.16    5.48
   4 -11 -30    8.48    3.61
  -7  -4  30    1.78    3.44
 -11   7 -30    4.41    2.81
  -4  11  30    4.48    1.62
  -7  11 -30    5.99    3.41
  11  -4 -30    0.96    1.89
   4 -11 -30   10.45    3.66
  -7  -4  30    8.46    3.06
   4 -11 -27  202.17   15.98
  -4  11  27  164.66   14.92
  -7  -4  27  173.50   16.42
  -7  11 -27  194.43   19.57
 -11   7 -27  166.62   16.40
   4 -11 -27  196.10   14.57
  11  -4 -27  181.74   17.94
  -4  -7 -27  235.91   20.75
  -7  -4  27  195.70   17.35
  -7  -4  27  191.05   15.53
   4 -11 -24  288.27   19.31
  -7  -4  24  256.32   19.73
  -4  11  24  257.38   18.56
  -7  11 -24  274.08   22.63
 -11   7 -24  269.19   20.10
   4 -11 -24  273.12   16.64
  11  -4 -24  274.23   21.56
  -7  -4  24  295.22   22.39
  -4  -7 -24  279.26   22.62
  -7  -4  24  255.07   18.05
   4 -11 -21   63.25    8.69
  -4  -7 -21   67.98   10.77
  -7  -4  21   53.64    9.25
  -7  -4  21   40.95    7.30
  -7  11 -21   41.23    8.33
 -11   7 -21   42.56    7.30
  -4  11  21   38.74    7.10
   4 -11 -21   56.58    7.72
  -7  -4  21   58.95    8.44
  11  -4 -21   42.61    8.82
  -4  11  18  184.14   16.22
   4 -11 -18  187.29   15.51
 -11   7 -18  160.78   14.84
  -7  11 -18  162.69   17.23
   7   4 -18  178.17   16.60
   4 -11 -18  184.55   12.94
  11  -4 -18  165.86   17.52
  -7  -4  18  202.18   19.71
  -4  -7 -18  182.23   17.76
  -7  -4  18  174.37   14.69
   4 -11 -15   59.94    7.98
  -4  11  15   64.14    9.12
  -7  -4  15   70.66   12.22
  -4  -7 -15   60.88    9.79
 -11   7 -15   72.00   10.48
  -7  11 -15   57.55    9.27
 -11   4  15   52.19    9.16
 -11   7 -15   49.96    7.66
  -7  11 -15   61.38    9.52
   7   4 -15   62.36    9.59
   4 -11 -15   68.22    7.50
  11  -4 -15   60.35   10.93
  -4  11  12  148.71   14.04
 -11   4  12  142.73   13.47
 -11   7 -12  156.61   14.28
  -7  11 -12  141.90   15.35
  11  -4 -12  130.35   15.56
   7   4 -12  148.59   14.96
  -7  -4  12  179.81   20.82
  -4  -7 -12  146.15   15.91
   4 -11 -12  149.96   14.01
 -11   4   9  263.47   17.37
 -11   7  -9  278.90   18.73
  -4  11   9  268.33   18.95
  -7  11  -9  249.02   19.59
   7   4  -9  287.02   20.04
  11  -4  -9  259.52   21.69
  -7  -4   9  318.17   25.70
  -4  -7  -9  259.63   20.78
   4 -11  -9  266.13   18.57
  11  -7   6   55.98    8.07
  -7  -4   6   55.59   10.91
 -11   4   6   52.03    7.64
  -4  -7  -6   53.94    9.80
  -4  11   6   54.52    8.05
 -11   7  -6   46.28    7.46
  -7  11  -6   50.34    8.58
   7   4  -6   58.28    8.54
   4 -11  -6   55.73    7.38
   4 -11  -6   59.91    8.81
  11  -4  -6   48.27    9.26
 -11   4   6   36.86    5.38
  11  -7   3  379.80   19.53
 -11   4   3  401.90   19.31
  -4  11   3  419.20   23.38
  -7  11  -3  411.54   24.46
 -11   7  -3  391.69   21.27
   7   4  -3  415.67   23.82
  11  -4  -3  373.61   25.67
  -7  -4   3  469.01   29.02
 -11   4   3  371.85   18.15
  -4  -7  -3  447.28   26.72
   4 -11  -3  480.08   24.63
   4 -11  -3  388.55   19.41
  -7  11   0  895.99   35.53
 -11   7   0  872.56   32.05
 -11   4   0  835.65   26.44
   4 -11   0  859.42   33.02
  11  -7   0  799.29   27.70
  -4  11   0  901.04   34.65
   7   4   0  912.84   35.02
  11  -4   0  799.83   37.19
  -7  -4   0  895.80   39.09
 -11   4   0  754.71   27.10
  -4  -7   0  863.35   37.26
   4 -11   0  852.80   29.11
 -11   7   3   37.34    6.28
  -7  11   3   34.64    6.84
  -4  11  -3   33.00    6.21
  11  -7  -3   41.65    6.66
  11  -4   3   39.78    7.20
   4 -11   3   48.17    7.70
  -7  -4  -3   41.91    8.06
  -4  -7   3   42.40    8.40
   4 -11   3   42.43    6.60
   7   4   3   39.22    6.99
 -11   4  -3   49.30    7.11
  11  -4   3   30.03    7.80
  11  -7  -3   34.25    8.45
 -11   7   6   10.10    4.04
  -7  11   6   14.14    3.97
  -4  11  -6   14.54    3.92
   4 -11   6   16.27    4.36
  -7  -4  -6   15.76    5.02
  -4  -7   6   14.89    3.34
  11  -7  -6   22.41    5.35
  11  -4   6   12.05    3.12
  -4  -7   6   13.46    1.52
   4 -11   6   11.14    2.43
  11  -7  -6   12.60    5.07
  11  -4   6   12.75    5.77
 -11   4  -6   18.00    4.54
   7   4   6   12.48    3.81
  -4  11  -9   48.02    9.06
 -11   7   9   36.62    7.80
  -7  11   9   43.67    8.12
  -4  11  -9   42.63    8.04
   4 -11   9   45.48    7.78
  11  -7  -9   61.43    8.90
  -4  -7   9   43.38    8.50
  11  -4   9   33.76    5.85
  -4  -7   9   45.66    8.63
  -7  -4  -9   43.51    8.40
  -4  -7   9   39.66    7.11
  11  -7  -9   38.35    8.99
 -11   4  -9   39.98    6.78
   7   4   9   48.73    7.72
  -7  11  12  683.86   33.52
  11  -4  12  488.23   22.53
  -4  -7  12  637.61   28.09
 -11   7  12  592.44   29.11
   4 -11  12  631.82   27.70
  -4  11 -12  650.82   30.58
  -4  11 -12  664.33   30.75
  11  -7 -12  623.82   33.07
   7   4  12  674.09   28.94
  -4  -7  12  653.39   29.16
  -7  -4 -12  657.87   32.60
 -11   4 -12  502.15   22.71
  -4  -7  12  617.45   30.66
  -7  11  15  239.83   19.51
  11  -4  15  213.29   15.53
  -4  -7  15  252.92   17.90
 -11   7  15  242.05   18.99
  -4  11 -15  252.11   19.58
  11  -7 -15  253.13   20.85
   7   4  15  250.36   17.81
  -7  -4 -15  249.82   19.80
 -11   4 -15  205.29   14.84
  -4  -7  15  252.19   17.93
  -4  -7  15  246.57   19.42
  -4  11 -18   22.06    6.10
 -11   7  18   12.83    4.66
  -7  11  18   18.19    4.33
  -4  -7  18   20.70    5.09
  11  -4  18   14.08    3.98
  -7  -4 -18   24.02    5.41
  -4  -7  18   25.68    6.24
  -4  -7  18   25.03    5.07
  11  -7 -18   21.17    6.34
 -11   4 -18   19.99    5.05
  11  -4  21   85.35   10.49
 -11   7  21   95.62   13.80
  -4  -7  21  106.34   11.88
  -7  11  21   95.34   12.36
  -4  11 -21   96.46   12.33
  11  -7 -21   88.38   12.27
   7 -11 -21  111.08    9.94
 -11   4 -21   90.73    9.95
  -7  -4 -21  101.61   12.70
  -4  -7  21  110.14   12.61
  -4  -7  21  105.30   11.83
  -7  11  24  189.19   17.55
  11  -4  24  171.88   15.15
  -4  -7  24  182.45   15.98
  -4  11 -24  185.76   17.52
  11  -7 -24  174.15   14.23
  11  -7 -24  178.43   17.08
   7 -11 -24  171.78   12.43
  -4  -7  24  174.03   15.53
 -11   4 -24  132.42   11.95
  -7  -4 -24  168.44   15.56
  -4  -7  24  186.10   16.13
  -4  -7  27   57.99    8.42
  11  -4  27   50.00    8.55
  -7  11  27   41.65    8.68
  -4  11 -27   50.22    8.90
   7 -11 -27   61.02    7.25
  11  -7 -27   51.80    7.79
  -7  -4 -27   49.71    9.04
  -4  -7  27   66.22    9.86
 -11   4 -27   52.48    7.48
  -7  -4 -27   59.93    9.30
  11  -7 -27   36.50    7.61
  11  -4  30  176.04   17.58
  -4  -7  30  179.35   15.56
  -7  11  30  186.12   18.13
  -4  11 -30  168.02   17.72
   7 -11 -30  167.36   12.80
  11  -7 -30  166.07   15.79
  11  -7 -30  167.22   14.59
 -11   4 -30  129.03   11.46
  -7  -4 -30  149.16   14.27
  -7  -4 -30  154.76   15.00
  -4  -7  30  179.43   16.46
  -4  -7  33   84.41   10.73
  11  -4  33   97.68   13.13
  -7  11  33  101.73   13.46
  -7  -4 -33   66.99    9.07
   4   7 -33   84.36   10.35
  -4  11 -33   86.85   12.43
   7 -11 -33   72.75    8.65
  11  -7 -33   82.59   10.99
  11  -7 -33   79.89   10.04
  -4  -7  33   89.74   10.81
  -7  -4 -33   84.51   11.27
  11  -4  36  102.98   13.72
  -4  -7  36   95.33   12.51
  -7  11  36   95.92   13.39
   4   7 -36   86.01   10.94
  -4  11 -36   95.21   13.73
   7 -11 -36   90.53   10.20
  11  -7 -36   84.95   11.95
  11  -7 -36   89.30   11.37
  -7  -4 -36   97.02   12.31
  -7  -4 -36   79.18   10.66
  -4  -7  36  103.14   12.91
  11  -4  39   89.48   13.06
  -4  11 -39   77.58   13.38
   4   7 -39   78.82   10.69
  -7  11  39   85.29   12.63
   7 -11 -39   74.77    9.56
  11  -7 -39   81.00   11.69
  11  -7 -39   85.98   11.00
  -7  -4 -39   76.95   11.06
  -7  -4 -39   69.33    9.61
  11  -4  42   27.40    6.73
   4   7 -42   23.39    5.32
  -4  11 -42   24.96    6.96
  -7  11  42   23.58    5.60
   7 -11 -42   24.60    5.10
  11  -7 -42   25.52    5.59
  -7  -4 -42   26.28    5.22
  11  -4  45  127.98   16.53
   4   7 -45  100.68   12.32
  -4  11 -45  105.97   14.69
  11  -7 -45  115.74   12.57
   7 -11 -45  112.00   12.14
  -7  -4 -45  100.54   11.00
  11  -4  48  310.35   25.24
   4   7 -48  237.43   19.65
  -4  11 -48  254.39   22.67
  11  -7 -48  260.40   19.89
   7 -11 -48  242.93   18.19
  -7  -4 -48  225.40   16.87
[truncated: 264,111 more chars]
